# Supplementary material for: The Vast, Conserved Mammalian lincRNome
Source: PLoS Comput Biol. 2013 Feb 28;9(2):e1002917. doi: 10.1371/journal.pcbi.1002917 (PMC3585383; doi:10.1371/journal.pcbi.1002917)
Supplement: Table S1 — Comprehensive information on the human and mouse lincRNA sets. (XLS) [file pcbi.1002917.s001.xls]

## Sheet: hs
DATA	Comprehensive information on all human lincRNAs and their putative orthologs
	ort_suffix denotes the putative ortholog data fields (hg19/mm9 genome coordinates)
	chr=chromosome, start = lincRNA gene start, end = lincRNA gene end, strand = DNA strand, length = lincRNA gene length
	Raw RNAseq read counts are available for each lincRNA at ftp://ftp.ncbi.nlm.nih.gov/pub/koonin/num_lincRNA/lincRNA_exp.xls
	ORFs were analyzed in human lincRNAs, ORF length less than 90 nt is given as 0
name	chr	start	end	strand	length	ort_chr	ort_start	ort_end	ort_strand	ort_length	exon_length	ort_exon_length	indel	ORF_length	RPKM	ort_RPKM
XLOC_000007	chr1	752750	755214	+	2464						1944			0	0.14768
XLOC_000008	chr1	756055	758975	+	2920						1422			0	1.36666
XLOC_000010	chr1	840486	841186	+	700						578			0	0.180617
XLOC_000015	chr1	1210338	1215800	+	5462						777	1848	0.408	306	0.80615
XLOC_000021	chr1	2357418	2362089	+	4671	chr4	154428573	154433343	-	4770	371	344	0.03776	0	0.600501	0.080135
XLOC_000022	chr1	2482414	2486841	+	4427						4267			0	0.392283
XLOC_000026	chr1	2693738	2695364	+	1626						875			0	0.073305
XLOC_000027	chr1	2730631	2734321	+	3690						686			126	1.88325
XLOC_000031	chr1	4036188	4069751	+	33563						585			174	2.40915
XLOC_000033	chr1	4472110	4484744	+	12634	chr4	153025914	153031500	-	5586	2234	690	0.52804	168	0.274543	0.044693
XLOC_000036	chr1	5058061	5080898	+	22837	chr4	152544522	152569037	-	24515	843	446	0.30799	102	0.541797	0.303088
XLOC_000037	chr1	5550601	5551645	+	1044						951			0	0.246995
XLOC_000041	chr1	6784696	6790072	+	5376	chr4	151283675	151290523	-	6848	2127	1031	0.34706	0	0.288354	0.1278
XLOC_000043	chr1	8268731	8275270	+	6539	chr4	150079975	150084333	-	4358	497	187	0.45322	111	0.435749	7.22267
XLOC_000044	chr1	8938893	8939953	+	1060	chr4	149609542	149611214	-	1672	456	1011	0.37832	0	5.09391	0.133305
XLOC_000051	chr1	11418036	11424587	+	6551	chr4	147750635	147753969	-	3334	717	136	0.68113	0	0.304158	0.217522
XLOC_000052	chr1	11432761	11438744	+	5983	chr4	147739918	147742064	-	2146	1923	621	0.51179	0	0.469652	0.108838
XLOC_000053	chr1	11669587	11673412	+	3825						1285			99	0.528075
XLOC_000054	chr1	11824461	11826573	+	2112	chr4	147445508	147447148	-	1640	726	657	0.04989	0	1.04253	0.082052
XLOC_000055	chr1	12587485	12588702	+	1217	chr4	144547163	144548568	-	1405	960	1171	0.09901	120	0.191888	0
XLOC_000062	chr1	16679039	16679908	+	869	chr4	140703247	140703764	-	517	382	198	0.31724	0	0.341611	0.524653
XLOC_000068	chr1	17516277	17524112	+	7835	chr4	140408595	140415537	-	6942	4676	6052	0.12826	0	0.034567	0.008823
XLOC_000082	chr1	20525483	20529294	+	3811	chr4	138265637	138268883	-	3246	1348	865	0.21826	0	0.348504	0.078137
XLOC_000083	chr1	20569587	20571148	+	1561	chr4	138232767	138233801	-	1034	480	121	0.59734	189	0.299052	0
XLOC_000086	chr1	21744781	21746509	+	1728						228			0	0.731439
XLOC_000087	chr1	21912964	21917680	+	4716	chr4	137291122	137293918	-	2796	821	229	0.56381	111	0.207337	0.233177
XLOC_000090	chr1	22582819	22584588	+	1769	chr4	136738671	136740198	-	1527	775	733	0.02785	0	0.084191	0
XLOC_000094	chr1	23908136	23919157	+	11021	chr4	135667439	135675971	-	8532	218	423	0.31981	0	0.538743	0.252831
XLOC_000095	chr1	24348318	24350190	+	1872						263			0	0.496181
XLOC_000098	chr1	24526729	24538183	+	11454	chr4	135214294	135223052	-	8758	1850	89	0.9082	0	0.063484	2.72348
XLOC_000099	chr1	25367663	25373839	+	6176						1015			108	0.012857
XLOC_000100	chr1	25534629	25535360	+	731						420			0	0
XLOC_000101	chr1	25907968	25916875	+	8907	chr4	134281323	134290517	-	9194	528	275	0.31507	102	2.28362	1.74755
XLOC_000105	chr1	27364504	27391197	+	26693	chr4	132998862	133014826	-	15964	4939	149	0.94143	0	0.289623	4.30662
XLOC_000116	chr1	30464331	30465136	+	805	chr4	130859521	130860206	+	685	503	442	0.06455	0	0.518869	0
XLOC_000122	chr1	31333697	31335492	+	1795						941			0	0.208016
XLOC_000123	chr1	31984035	31989846	+	5811						2741			138	0.058969
XLOC_000147	chr1	38607364	38628221	+	20857	chr4	124228769	124245553	-	16784	429	398	0.03748	0	0.395441	0.217398
XLOC_000152	chr1	39508263	39509883	+	1620						285			0	6.32118
XLOC_000153	chr1	39512711	39514128	+	1417	chr4	123382529	123382936	-	407	726	210	0.55128	0	1.11373	0.256707
XLOC_000155	chr1	40289923	40303684	+	13761	chr4	122737279	122753615	-	16336	842	908	0.03771	117	0.696867	1.50107
XLOC_000166	chr1	45282504	45283445	+	941						883			0	1.10414
XLOC_000167	chr1	45672403	45683543	+	11140	chr4	116535857	116549687	-	13830	320	278	0.07023	0	5.85292	0.88742
XLOC_000170	chr1	46921494	46948147	+	26653	chr4	115620931	115645623	-	24692	354	88	0.60181	0	1.58512	1.82037
XLOC_000175	chr1	47644289	47645982	+	1693	chr4	114769161	114770800	-	1639	1495	1480	0.00504	0	0.693751	0.020346
XLOC_000180	chr1	48283737	48285909	+	2172	chr4	114234955	114236853	-	1898	1807	1667	0.0403	96	0.122768	0.388479
XLOC_000184	chr1	50723328	50723876	+	548	chr4	109811844	109812398	-	554	314	297	0.02782	0	0.166236	0.118797
XLOC_000190	chr1	51443232	51479174	+	35942	chr4	109307959	109330466	-	22507	4535	437	0.82422	0	1.45342	9.04185
XLOC_000194	chr1	53656724	53657133	+	409						314			114	0.043206
XLOC_000197	chr1	53793904	53802890	+	8986	chr4	107468841	107474706	-	5865	1276	116	0.83333	0	0.41133	2.39732
XLOC_000198	chr1	53905437	53923449	+	18012	chr4	107359932	107379891	-	19959	346	340	0.00875	0	1.73491	4.35733
XLOC_000207	chr1	56289439	56333921	+	44482	chr4	105491819	105507106	-	15287	838			0	1.32364
XLOC_000208	chr1	56336185	56345756	+	9571	chr4	105480113	105487121	-	7008	1099	63	0.89157	102	0.439339	3.22422
XLOC_000209	chr1	56410759	56415792	+	5033	chr4	105420133	105425915	-	5782	453	419	0.03899	0	0.28807	0.221232
XLOC_000213	chr1	56700767	56703535	+	2768	chr4	105140627	105143890	-	3263	417	391	0.03218	0	0.194755	0
XLOC_000214	chr1	56880634	56881638	+	1004	chr4	104980738	104981727	-	989	728	758	0.02019	0	0.559067	0.086914
XLOC_000218	chr1	59180599	59184660	+	4061	chr4	94659954	94662843	+	2889	889	389	0.39124	0	0.391849	0.137269
XLOC_000221	chr1	59613312	59615760	+	2448						486			0	0.698124
XLOC_000222	chr1	60238466	60254499	+	16033	chr4	95603243	95614582	+	11339	526	788	0.19939	0	0.819442	0.615706
XLOC_000224	chr1	60580546	60615351	+	34805	chr4	96492227	96526738	+	34511	810	556	0.18594	0	0.315953	0.259366
XLOC_000225	chr1	60708562	60724248	+	15686	chr4	96657779	96673097	+	15318	218	619	0.47909	120	0.432509	0.057
XLOC_000232	chr1	63662011	63664798	+	2787	chr4	99237648	99240142	+	2494	803	729	0.0483	93	0.390024	0.075628
XLOC_000236	chr1	67987995	67998015	+	10020	chr6	67111335	67117782	-	6447	581	60	0.81279	198	2.29516	12.4772
XLOC_000246	chr1	71172135	71252214	+	80079						2228	603	0.574	90	0.538058
XLOC_000247	chr1	71303919	71304747	+	828	chr3	157394099	157394521	-	422	740	422	0.27367	0	0.182021	0.328219
XLOC_000253	chr1	73020892	73023568	+	2676	chr3	156035946	156039398	-	3452	214	1364	0.72877	0	0.189749	0.043377
XLOC_000256	chr1	73771634	73820934	+	49300	chr3	155482812	155522498	-	39686	4872	1958	0.42665	138	0.270527	0.090099
XLOC_000262	chr1	77533604	77544167	+	10563	chr3	152471866	152479672	-	7806	497	407	0.09956	0	1.81795	2.40795
XLOC_000263	chr1	77685226	77686969	+	1743						520	101	0.67472	0	0.492158
XLOC_000264	chr1	78689325	78759574	+	70249	chr3	151665655	151726214	-	60559	2207	295	0.76419	0	0.823921	1.99109
XLOC_000266	chr1	79735991	79871942	+	135951	chr3	150736519	150875103	-	138584	1275	994	0.12384	180	1.77065	1.12394
XLOC_000268	chr1	81001439	81112834	+	111395	chr3	149722242	149814532	-	92290	1070	914	0.07863	0	6.00466	1.39176
XLOC_000269	chr1	83368865	83632498	+	263633	chr3	147312717	147572566	-	259849	1878	715	0.44852	189	1.42706	4.98824
XLOC_000271	chr1	83982444	84039951	+	57507	chr3	146935898	146998232	-	62334	617	86	0.75533	0	0.899439	2.36193
XLOC_000274	chr1	85463021	85463597	+	576	chr3	145812724	145813062	-	338	479	250	0.31413	0	0.141289	0.415525
XLOC_000278	chr1	86093301	86094050	+	749	chr3	145278193	145278870	-	677	437	284	0.21221	0	0.345267	0.379637
XLOC_000280	chr1	88425114	88427536	+	2422	chr3	143254164	143256898	-	2734	511	489	0.022	0	0.787379	0.138218
XLOC_000283	chr1	89510012	89512879	+	2867						896			0	0.664938
XLOC_000290	chr1	90224275	90227625	+	3350	chr5	106078982	106082861	+	3879	288	82	0.55676	0	3.12646	9.76783
XLOC_000292	chr1	90254472	90256051	+	1579	chr5	106101188	106103857	+	2669	509	2117	0.61234	111	0.126015	0.049999
XLOC_000293	chr1	91316659	91320704	+	4045	chr5	107003461	107007215	+	3754	1773	1578	0.05819	0	0.154563	0.096543
XLOC_000301	chr1	94792783	94808287	+	15504	chr3	121578012	121593785	-	15773	660	480	0.15789	0	0.652478	0.643725
XLOC_000303	chr1	95143553	95155440	+	11887	chr3	121329955	121340048	-	10093	3102	955	0.52921	0	0.178346	0.184727
XLOC_000304	chr1	95392853	95433017	+	40164	chr3	121086461	121129283	-	42822	2335	2020	0.07233	0	7.62517	2.71781
XLOC_000309	chr1	95940292	95944912	+	4620	chr3	120619572	120621551	-	1979	2755	467	0.71012	0	0	0.114342
XLOC_000312	chr1	96403456	96488437	+	84981	chr3	120116338	120193317	-	76979	1301	1221	0.03172	219	2.09635	2.86298
XLOC_000313	chr1	96979645	96989651	+	10006	chr3	119649089	119657672	-	8583	467	415	0.05896	0	0.412555	0.643343
XLOC_000316	chr1	101121834	101171700	+	49866	chr3	115850328	115880512	-	30184	2386	2128	0.05716	0	1.64277	0.162721
XLOC_000318	chr1	101616108	101641117	+	25009	chr3	115468411	115483035	-	14624	9285	474	0.90286	0	0.580998	2.97745
XLOC_000329	chr1	106993264	107028330	+	35066	chr3	110691883	110720311	-	28428	902	245	0.5728	198	0.115739	0.68968
XLOC_000332	chr1	108593041	108594976	+	1935	chr3	109053625	109056037	-	2412	360	935	0.44402	0	0.521587	0
XLOC_000339	chr1	110370976	110414058	+	43082	chr3	107603888	107626816	-	22928	476	322	0.19298	99	1.38657	1.67922
XLOC_000340	chr1	110624851	110652861	+	28010	chr3	107359059	107388357	-	29298	2079	1753	0.08507	132	0.208367	0.098765
XLOC_000348	chr1	113392649	113420493	+	27844						587	515	0.06534	111	1.04485
XLOC_000350	chr1	113673732	113674746	+	1014	chr3	104258019	104258727	-	708	911	531	0.26352	0	5.84385	0.170121
XLOC_000357	chr1	115642292	115645279	+	2987	chr3	102527363	102528083	-	720	491	80	0.71979	0	1.68173	0
XLOC_000360	chr1	116461996	116468528	+	6532	chr3	101767595	101771995	-	4400	1395	1156	0.09369	0	1.21378	0.026729
XLOC_000364	chr1	117838141	117863958	+	25817	chr3	100532765	100561219	-	28454	528	300	0.27536	123	0.519016	4.06252
XLOC_000367	chr1	118738865	118749628	+	10763						721	311	0.39729	93	0.452481
XLOC_000369	chr1	119805546	119818393	+	12847	chr3	98798553	98823048	-	24495	604	1047	0.26832	93	0.628919	1.763
XLOC_000370	chr1	119870798	119873438	+	2640	chr3	98741201	98743774	-	2573	442	307	0.18024	0	0.213319	0.330238
XLOC_000373	chr1	120612585	120638073	+	25488	chr3	97790638	97817202	-	26564	699	962	0.15834	0	3.61229	26.5642
XLOC_000375	chr1	121138613	121204983	+	66370	chr13	117897496	117974012	+	76516	4158	480	0.79301	0	1.1249	6.65617
XLOC_000377	chr1	142618768	142625251	+	6483						1347			0	0.248911
XLOC_000379	chr1	143188827	143189695	+	868	chr3	35905888	35910228	+	4340	470	3413	0.75792	126	0.518591	0.041781
XLOC_000380	chr1	143231331	143232085	+	754						269			0	0.482068
XLOC_000385	chr1	146644349	146648626	+	4277						1611			0	1.67542
XLOC_000387	chr1	147249688	147267415	+	17727	chr3	96814141	96832315	-	18174	3152	4147	0.13632	99	0.940136	0.142672
XLOC_000390	chr1	148556022	148558168	+	2146	chr5	108296581	108298028	-	1447	980	780	0.11364	0	1.2983	0.69729
XLOC_000391	chr1	148852392	148853717	+	1325	chr11	78951495	78959394	+	7899	408	6797	0.88675	93	0.08218	0.635977
XLOC_000393	chr1	149230538	149232553	+	2015						1411			99	0.145466
XLOC_000398	chr1	149615885	149616885	+	1000						576			0	0.066897
XLOC_000403	chr1	150504636	150509813	+	5177	chr3	95503916	95506248	-	2332	2034	183	0.83491	0	0.67586	3.91654
XLOC_000421	chr1	155961180	155971578	+	10398						401	840	0.35375	0	1.96265
XLOC_000424	chr1	156481486	156483108	+	1622	chr3	87931730	87932338	-	608	1239	320	0.58948	0	0.240339	0
XLOC_000451	chr1	166304120	166308626	+	4506	chr1	168783767	168790180	-	6413	913	942	0.01563	150	0.20565	0.229609
XLOC_000455	chr1	168756178	168762120	+	5942	chr1	166685987	166689527	-	3540	949	1016	0.0341	0	0.16501	0.079589
XLOC_000457	chr1	169073361	169074145	+	784	chr1	166389823	166390792	-	969	568	544	0.02158	0	4.69538	0.778915
XLOC_000462	chr1	171584010	171595732	+	11722	chr1	164584593	164589626	-	5033	625	483	0.12816	0	0.237065	10.3236
XLOC_000468	chr1	173991646	173992123	+	477	chr1	162836142	162836389	-	247	335	144	0.39875	126	0.89594	0
XLOC_000471	chr1	176176783	176198485	+	21702	chr1	161141353	161162003	-	20650	663			144	2.04817
XLOC_000477	chr1	180528109	180535654	+	7545	chr1	157338139	157342228	-	4089	1940	1894	0.012	99	0.207392	0.034065
XLOC_000478	chr1	180864245	180869874	+	5629						1817			273	0.278336
XLOC_000483	chr1	182055685	182059247	+	3562	chr1	156023507	156027449	-	3942	1145	991	0.0721	99	0.100959	0.161647
XLOC_000485	chr1	182376755	182383948	+	7193	chr1	155709700	155716713	-	7013	738	520	0.17329	0	0.3006	0.300004
XLOC_000486	chr1	182681804	182683733	+	1929	chr1	155472975	155474721	-	1746	470	169	0.47105	0	0.88848	0.199966
XLOC_000490	chr1	184090199	184091540	+	1341	chr1	154172131	154173499	-	1368	805	1111	0.15971	90	0.211458	0
XLOC_000492	chr1	184632074	184634810	+	2736	chr1	153692486	153694611	-	2125	1896	1431	0.13977	183	0.159158	0.111944
XLOC_000494	chr1	185339833	185344123	+	4290	chr1	153133430	153136191	-	2761	794	1106	0.16421	0	0.262963	0.049849
XLOC_000495	chr1	185527510	185590112	+	62602	chr1	152918113	152951921	-	33808	672	656	0.01205	0	5.76744	0.851518
XLOC_000497	chr1	187061973	187329455	+	267482	chr1	151226313	151556223	-	329910	858	675	0.11937	0	0.677854	12.5665
XLOC_000505	chr1	190447355	190463427	+	16072	chr1	148321879	148342451	-	20572	2202	2635	0.08952	0	0.586229	0.064126
XLOC_000506	chr1	191190288	191197597	+	7309	chr1	147567879	147572871	-	4992	299			0	0.043644
XLOC_000508	chr1	193273874	193335083	+	61209	chr1	145329359	145397786	-	68427	1515	1150	0.13696	0	0.346441	1.14848
XLOC_000511	chr1	195450555	195469368	+	18813	chr1	143119643	143139368	-	19725	221			0	0.444199
XLOC_000515	chr1	200380828	200447421	+	66593	chr1	138470521	138520209	-	49688	2360	1790	0.13735	0	0.689831	11.35
XLOC_000523	chr1	201508267	201557780	+	49513	chr1	137536676	137584698	-	48022	886	741	0.08912	219	2.38303	0.936798
XLOC_000527	chr1	202779995	202781186	+	1191	chr1	136452495	136453661	-	1166	878	832	0.0269	0	5.1574	0
XLOC_000529	chr1	203343729	203369257	+	25528	chr1	135887220	135904507	-	17287	4410	3730	0.08354	0	3.04966	0.430084
XLOC_000542	chr1	208132708	208134955	+	2247	chr1	196708948	196712141	-	3193	834	1020	0.10032	0	0.243444	0.058098
XLOC_000545	chr1	208901289	208910106	+	8817	chr1	195983888	195989805	-	5917	2511	729	0.55	144	0.342999	0.042385
XLOC_000547	chr1	209498776	209501877	+	3101	chr1	195433315	195436466	-	3151	519	496	0.02266	117	0.477729	0
XLOC_000550	chr1	211849015	211863445	+	14430	chr1	193637682	193645339	-	7657	3380	395	0.79073	0	0.42469	15.9889
XLOC_000554	chr1	212719035	212729407	+	10372						332	38	0.79459	0	4.91324
XLOC_000556	chr1	212840986	212848586	+	7600	chr1	192942551	192948127	-	5576	620	69	0.79971	150	0.420953	55516.6
XLOC_000564	chr1	218338444	218340185	+	1741	chr1	188656137	188657801	-	1664	362	351	0.01543	0	0.448689	0.084282
XLOC_000565	chr1	219092181	219098202	+	6021	chr1	188093076	188096804	-	3728	1168			0	0.770907
XLOC_000566	chr1	219391857	219500273	+	108416	chr1	187811376	187910764	-	99388	1545	1332	0.07404	0	3.60911	0.641411
XLOC_000567	chr1	219616119	219618818	+	2699	chr1	187708355	187710933	-	2578	1178	1052	0.0565	0	0.903584	0.027416
XLOC_000570	chr1	220605799	220608985	+	3186	chr1	186905873	186906752	-	879	202			0	0.333405
XLOC_000576	chr1	222763272	222766374	+	3102	chr1_random	359516	362194	-	2678	1344			105	1.39817
XLOC_000579	chr1	223317390	223318296	+	906	chr1	184883153	184883689	-	536	613	327	0.30426	0	0.285894	0
XLOC_000584	chr1	224954057	224967057	+	13000	chr1	183412611	183433312	+	20701	1150	666	0.26652	90	1.23912	0.158932
XLOC_000585	chr1	225657546	225660157	+	2611	chr1	183816103	183817334	+	1231	2269	1231	0.29657	126	0.62185	0.028129
XLOC_000587	chr1	225888414	225904316	+	15902	chr1	183988551	183998584	+	10033	1414	1300	0.042	0	0.756224	0.110098
XLOC_000600	chr1	228688982	228697976	+	8994						874	375	0.39952	135	0.714136
XLOC_000604	chr1	230138431	230142912	+	4481	chr8	126720517	126722010	+	1493	702	286	0.42105	177	0.320977	0
XLOC_000614	chr1	232295836	232321389	+	25553	chr8	127831504	127843392	+	11888	818	128	0.72939	105	0.031906	0.270524
XLOC_000617	chr1	232853816	232862099	+	8283						584	132	0.63128	0	0.290487
XLOC_000618	chr1	232979122	233033391	+	54269	chr8	128214658	128235030	+	20372	1155	314	0.5725	255	0.813479	0.538126
XLOC_000620	chr1	233860044	233866505	+	6461						1113			114	0.996597
XLOC_000623	chr1	234765056	234770524	+	5468						2268			0	0.241153
XLOC_000633	chr1	237070343	237091621	+	21278	chr13	12261460	12271094	-	9634	7452	6549	0.0645	135	0.797113	0.202478
XLOC_000639	chr1	244080673	244210617	+	129944	chr1	179252963	179371279	+	118316	1827	1786	0.01135	183	0.761611	2.43874
XLOC_000642	chr1	246846452	246855175	+	8723						924	1181	0.12209	93	0.58338
XLOC_000643	chr1	246938404	246956015	+	17611	chr1	181627848	181641789	+	13941	4752	3185	0.19743	0	0.304737	0.277402
XLOC_000647	chr1	247496211	247556961	+	60750						1372	868	0.225	0	6.1056
XLOC_000649	chr1	247537324	247538837	+	1513						1000			204	0
XLOC_000650	chr1	247802917	247803681	+	764	chr14	61792763	61793107	+	344	661	330	0.33401	0	0.927881	0
XLOC_000653	chr1	249153362	249158995	+	5633	chr11	58119218	58120538	-	1320	462	27	0.88957	0	0.706196	1.30677
XLOC_000670	chr1	852249	855072	-	2823						1813			0	0.539872
XLOC_000675	chr1	1944651	1946969	-	2318	chr4	154775183	154776106	+	923	2138	732	0.4899	0	0.227397	0.192802
XLOC_000676	chr1	1980668	1981566	-	898	chr4	154735830	154736027	+	197	769	197	0.59213	0	0.135756	0
XLOC_000677	chr1	2143609	2152175	-	8566	chr4	154601527	154610019	+	8492	612	595	0.01408	183	1.58113	1.3558
XLOC_000678	chr1	2481358	2485684	-	4326						2803			0	0.597171
XLOC_000682	chr1	2976094	2978596	-	2502	chr4	154017715	154018880	+	1165	1996	1106	0.28691	0	3.7453	0.024924
XLOC_000683	chr1	3539428	3541333	-	1905	chr4	153535013	153535994	+	981	973	222	0.62845	141	0.639718	0
XLOC_000684	chr1	4007208	4009040	-	1832						937			0	0.125343
XLOC_000686	chr1	5058061	5058786	-	725						277			0	0.423993
XLOC_000695	chr1	8062788	8067529	-	4741	chr4	150244931	150248279	+	3348	3082	2347	0.13538	0	1.50985	0.153957
XLOC_000697	chr1	9474621	9489003	-	14382	chr4	149228556	149241936	+	13380	1765	1925	0.04336	0	0.889907	0.443823
XLOC_000699	chr1	9561150	9563530	-	2380	chr4	149172968	149173340	+	372	708	231	0.50799	0	1.54162	0
XLOC_000702	chr1	11433556	11434764	-	1208						897			0	0.654138
XLOC_000708	chr1	14548385	14549613	-	1228	chr4	142379575	142380928	+	1353	282	272	0.01805	0	0.416143	0.544667
XLOC_000709	chr1	14609148	14630936	-	21788	chr4	142313291	142321596	+	8305	288	275	0.02309	0	1.22242	3.87882
XLOC_000711	chr1	14717204	14746458	-	29254	chr4	142234771	142252114	+	17343	1035			207	2.89939
XLOC_000721	chr1	16123396	16126839	-	3443						282	522	0.29851	0	0.298383
XLOC_000724	chr1	18335985	18337010	-	1025	chr4	139883586	139884483	+	897	710	636	0.05498	123	0.349213	0
XLOC_000730	chr1	20686293	20757727	-	71434	chr4	138060805	138119958	+	59153	5706	3095	0.29667	0	0.219551	0.246138
XLOC_000731	chr1	20738796	20739746	-	950	chr4	138070106	138071770	+	1664	376	259	0.18425	0	0	0
XLOC_000732	chr1	22350486	22352724	-	2238	chr4	136943609	136946042	+	2433	1176	877	0.14564	0	0.542806	1.06606
XLOC_000733	chr1	22744725	22745435	-	710	chr4	136630936	136631444	+	508	321	272	0.08263	111	0.376018	0
XLOC_000734	chr1	23608314	23610576	-	2262	chr4	135911801	135914769	+	2968	1381	1771	0.12373	90	2.45233	0.034894
XLOC_000735	chr1	23875629	23877406	-	1777	chr4	135710119	135710492	+	373	456	331	0.15883	0	0.915758	0.322643
XLOC_000736	chr1	23877740	23878134	-	394	chr4	135708163	135708485	+	322	230	158	0.18557	0	0.80178	0
XLOC_000741	chr1	24523478	24526136	-	2658	chr4	135223377	135226418	+	3041	1388	2109	0.20618	156	0.009402	0.322621
XLOC_000743	chr1	24822804	24829143	-	6339	chr4	134989963	134993941	+	3978	1013	778	0.13121	168	0.665663	0.116111
XLOC_000744	chr1	24863137	24882323	-	19186	chr4	134954363	134970483	+	16120	1692	609	0.47066	0	37.3545	51.8158
XLOC_000746	chr1	25579797	25594376	-	14579						3683	94	0.95023	93	1.98933
XLOC_000751	chr1	26325874	26331040	-	5166						582	352	0.24625	0	0.992847
XLOC_000757	chr1	28567779	28573670	-	5891	chr4	132071712	132084565	+	12853	1769			0	1.04527
XLOC_000762	chr1	29196994	29203848	-	6854	chr4	131645031	131661505	+	16474	1159	1247	0.03658	153	1.09932	1.62603
XLOC_000767	chr1	30882406	30884485	-	2079	chr4	130634394	130635928	+	1534	507	294	0.26592	93	0	0
XLOC_000768	chr1	31168511	31181236	-	12725	chr4	130516169	130519193	+	3024	726	66	0.83333	183	0.106123	0.436993
XLOC_000778	chr1	33183334	33190838	-	7504	chr4	128940961	128946494	+	5533	395	159	0.42599	0	0.297332	5.49201
XLOC_000782	chr1	35606940	35611998	-	5058						2356			0	0.52816
XLOC_000787	chr1	37920479	37940012	-	19533	chr4	124805189	124823016	+	17827	1395	1221	0.06651	0	1.69252	0.262771
XLOC_000788	chr1	38674705	38680439	-	5734	chr4	124183007	124188075	+	5068	3554	3106	0.06727	0	0.106482	0.008875
XLOC_000789	chr1	38765780	38777050	-	11270	chr4	124100588	124105646	+	5058	455	365	0.10976	0	0.478989	0.278255
XLOC_000794	chr1	40623423	40626915	-	3492						251	150	0.25187	102	0.259951
XLOC_000808	chr1	43820354	43824390	-	4036	chr4	118110141	118114811	+	4670	874	1612	0.29686	0	0.552441	2.69802
XLOC_000812	chr1	44410041	44412223	-	2182	chr4	117588011	117589345	+	1334	557	147	0.58239	0	0.874823	0.726496
XLOC_000814	chr1	44498209	44499602	-	1393	chr4	117504835	117506920	+	2085	476	465	0.01169	0	0.107801	0.134195
XLOC_000818	chr1	46912344	46915376	-	3032	chr4	115651251	115653772	+	2521	1129	1021	0.05023	0	0.088702	0.104748
XLOC_000819	chr1	47638526	47640990	-	2464						947			0	0.327139
XLOC_000822	chr1	47846386	47874257	-	27871	chr4	114606301	114631213	+	24912	1327	1315	0.00454	0	2.07382	0.719889
XLOC_000828	chr1	48727014	48730430	-	3416	chr4	111526544	111540207	+	13663	342	320	0.03323	0	1.23046	0.096368
XLOC_000830	chr1	50717181	50723876	-	6695	chr4	109811844	109825768	+	13924	339	345	0.00877	123	0.500425	0.111346
XLOC_000831	chr1	50731520	50745851	-	14331	chr4	109792192	109806875	+	14683	886	824	0.03626	0	0.206201	0.123256
XLOC_000832	chr1	50782664	50786833	-	4169	chr4	109745759	109750619	+	4860	966	879	0.04715	0	2.06685	0.349617
XLOC_000835	chr1	53798052	53812604	-	14552	chr4	107455216	107469277	+	14061	1045	34	0.93698	0	0.539056	12.9214
XLOC_000836	chr1	53814159	53814905	-	746	chr4	107449744	107451908	+	2164	383	203	0.30717	0	0.102216	0
XLOC_000837	chr1	53832339	53833917	-	1578	chr4	107433542	107434306	+	764	850	209	0.60529	132	0.589086	0
XLOC_000840	chr1	54878380	54879139	-	759	chr4	106574863	106575185	+	322	454	226	0.33529	153	0.36733	0
XLOC_000843	chr1	56620355	56621430	-	1075						412			0	0.392318
XLOC_000844	chr1	56701943	56719436	-	17493	chr4	105131310	105142294	+	10984	569	696	0.1004	0	1.08761	0.306882
XLOC_000846	chr1	57093428	57110930	-	17502	chr4	104782560	104801194	+	18634	1257	1749	0.16367	0	0.519075	3.18471
XLOC_000851	chr1	59597608	59664293	-	66685	chr4	95068666	95143180	-	74514	1566	1421	0.04854	0	2.63324	1.07876
XLOC_000852	chr1	59760541	59762053	-	1512	chr4	95222712	95223896	-	1184	914	623	0.18933	0	0.533125	0.043265
XLOC_000854	chr1	60429955	60433906	-	3951	chr4	96360147	96362085	-	1938	666	318	0.35366	0	0.411473	0.499681
XLOC_000855	chr1	61005920	61106163	-	100243	chr4	96927524	97063558	-	136034	1840	550	0.53975	171	0.974899	19.3154
XLOC_000856	chr1	61125302	61291256	-	165954	chr4	97076835	97204149	-	127314	2344	187	0.85223	162	0.421976	2.85548
XLOC_000857	chr1	63466167	63478142	-	11975	chr4	99042756	99053780	-	11024	676	642	0.0258	201	0.328169	0.171753
XLOC_000863	chr1	65532309	65533420	-	1111	chr4	101028684	101029340	-	656	310	263	0.08202	0	0.611279	1.51044
XLOC_000869	chr1	71181615	71185972	-	4357	chr3	157445138	157448618	+	3480	432			0	0.155898
XLOC_000873	chr1	77223808	77244952	-	21144	chr3	152735790	152766403	+	30613	448	577	0.12585	0	0.09489	1.29561
XLOC_000879	chr1	79775129	79779074	-	3945	chr3	150841762	150845926	+	4164	326			0	0.360264
XLOC_000881	chr1	79789341	79790552	-	1211						686			0	0.475567
XLOC_000888	chr1	84464969	84466352	-	1383	chr3	146514001	146515204	+	1203	1141	994	0.06885	0	0.423167	0.101995
XLOC_000889	chr1	84542061	84543595	-	1534	chr3	146476042	146478871	+	2829	1296	2605	0.33555	0	0.687611	0.044239
XLOC_000892	chr1	84830647	84863576	-	32929	chr3	146260104	146294001	+	33897	1596	2149	0.14766	303	0.253469	0.217779
XLOC_000893	chr1	84920351	84924713	-	4362	chr3	146198443	146212259	+	13816	390	281	0.16244	0	0.065786	8.66061
XLOC_000895	chr1	85063634	85086673	-	23039						1127			153	0.922277
XLOC_000901	chr1	87818531	87837382	-	18851	chr3	143823738	143841892	+	18154	1733	1923	0.05197	0	0.715354	0.126048
XLOC_000902	chr1	88365591	88442197	-	76606	chr3	143240541	143313986	+	73445	946	693	0.15436	0	0.318989	0.849438
XLOC_000904	chr1	88937998	88939861	-	1863	chr3	142753625	142755640	+	2015	659	634	0.01933	0	0.356437	0.045491
XLOC_000905	chr1	88994517	88995833	-	1316	chr3	142680128	142681126	+	998	328	74	0.63184	0	0.556993	0
XLOC_000909	chr1	90076597	90098553	-	21956	chr5	105928150	105948327	-	20177	2131	1213	0.27452	0	2.2657	3.08304
XLOC_000910	chr1	90224687	90229610	-	4923	chr5	106080205	106084691	-	4486	1177	1031	0.06612	165	0.931319	0.932255
XLOC_000914	chr1	90976466	90999029	-	22563	chr5	106731755	106747637	-	15882	1050	348	0.50215	0	0.47227	0.580146
XLOC_000915	chr1	91248094	91317317	-	69223	chr5	106942392	107003890	-	61498	4779	3310	0.1816	180	1.33526	0.043241
XLOC_000916	chr1	91954576	91964760	-	10184						975	679	0.17896	0	0.776281
XLOC_000918	chr1	93770667	93811405	-	40738						4705	219	0.91105	0	3.40689
XLOC_000920	chr1	94784034	94790125	-	6091	chr3	121597426	121604134	+	6708	592	259	0.3913	0	0.250279	12.607
XLOC_000922	chr1	95081952	95089740	-	7788	chr3	121375033	121382241	+	7208	3304	3043	0.04112	0	0.346524	0.087738
XLOC_000927	chr1	95776483	95783970	-	7487	chr3	120795312	120806201	+	10889	736	728	0.00546	0	7.62406	0.310185
XLOC_000928	chr1	95816806	95817810	-	1004	chr3	120746159	120747773	+	1614	602	1210	0.33554	0	0.195093	0
XLOC_000933	chr1	98398901	98440557	-	41656	chr3	118217148	118251339	+	34191	1030	970	0.03	0	1.46487	2.91759
XLOC_000934	chr1	99891592	99895068	-	3476	chr3	116917731	116920636	-	2905	218	53	0.60886	0	0.473468	0
XLOC_000935	chr1	99937917	99999571	-	61654	chr3	116813015	116865503	+	52488	495	507	0.01198	93	0.991595	1.10177
XLOC_000939	chr1	100728862	100731676	-	2814	chr3	116211148	116212676	+	1528	2682	627	0.62103	0	0.519818	0.056272
XLOC_000940	chr1	101092604	101110754	-	18150	chr3	115884555	115894326	+	9771	407	356	0.06684	0	0.76118	0.599972
XLOC_000942	chr1	101701238	101702084	-	846	chr3	115418159	115419005	+	846	403	384	0.02414	0	3.05908	0.080307
XLOC_000943	chr1	102665294	102855186	-	189892	chr3	114249122	114442209	+	193087	1251	361	0.55211	0	0.56329	4.00719
XLOC_000944	chr1	103228877	103319398	-	90521	chr3	113930356	113999369	+	69013	931	269	0.55167	168	0.04205	0.397007
XLOC_000945	chr1	103820968	104068139	-	247171	chr3	113333355	113480028	+	146673	1175	190	0.72161	102	0.676345	176.252
XLOC_000947	chr1	106015902	106029242	-	13340						583			273	0.470053
XLOC_000948	chr1	106132314	106161581	-	29267						1941			0	1.36479
XLOC_000950	chr1	106590149	106615801	-	25652	chr3	111079736	111103975	+	24239	1585	1490	0.03089	0	1.01268	0.04736
XLOC_000951	chr1	109621257	109627542	-	6285	chr3	108370534	108372160	+	1626	451	404	0.05497	0	0.566155	0.095085
XLOC_000956	chr1	110751455	110752609	-	1154	chr3	107263349	107264534	+	1185	748	793	0.0292	0	0.575716	0.384223
XLOC_000957	chr1	110829000	110881793	-	52793	chr3	107136233	107179181	+	42948	2607	299	0.79422	135	0.870972	4.1075
XLOC_000966	chr1	113362791	113393265	-	30474						1909			111	0.437492
XLOC_000967	chr1	113554308	113615724	-	61416	chr3	104315916	104374914	+	58998	2456	2583	0.0252	0	3.3011	0.454799
XLOC_000971	chr1	115813552	115819102	-	5550	chr3	102334193	102337946	+	3753	508	20	0.92424	0	0.083772	1.76414
XLOC_000972	chr1	116463388	116466789	-	3401	chr3	101769724	101771995	+	2271	2366	881	0.45735	0	0.55268	0.268513
XLOC_000973	chr1	116783460	116784684	-	1224	chr3	101519443	101521848	+	2405	435	406	0.03448	0	0.569981	0.394563
XLOC_000974	chr1	116831855	116837107	-	5252	chr3	101483968	101488377	+	4409	839			0	0.886561
XLOC_000980	chr1	118139453	118148443	-	8990	chr3	100293363	100304138	+	10775	1366	1501	0.04709	0	0.229275	0.094025
XLOC_000982	chr1	119542966	119544028	-	1062	chr3	99044246	99045332	+	1086	687	714	0.01927	0	0.132965	0.071122
XLOC_000984	chr1	119860047	119860947	-	900						557			0	0.681988
XLOC_000986	chr1	120615907	120619716	-	3809	chr3	97809125	97812263	+	3138	2136	1936	0.04912	0	0.225797	0.805796
XLOC_000992	chr1	121484056	121485434	-	1378						1220			0	2.06746
XLOC_001002	chr1	146644429	146645134	-	705						604			0	1.09807
XLOC_001009	chr1	148933290	148951501	-	18211						317	62	0.67282	0	11.529
XLOC_001011	chr1	149590751	149591762	-	1011	chr13	117797342	117798733	+	1391	398	534	0.14592	0	0.033697	1.75081
XLOC_001013	chr1	149993002	149998813	-	5811	chr3	95894903	95899200	+	4297	345	749	0.36929	0	0.453898	0.082344
XLOC_001020	chr1	150507527	150508415	-	888	chr3	95503916	95504102	+	186	239	127	0.30601	0	0.697774	0
XLOC_001025	chr1	151120884	151123810	-	2926	chr3	94960139	94962154	+	2015	1722	1793	0.0202	0	0.431954	0
XLOC_001035	chr1	154442112	154445591	-	3479						1538	338	0.63966	0	2.16746
XLOC_001036	chr1	154671124	154675050	-	3926	chr3	89476123	89479616	+	3493	875	868	0.00402	147	15.1744	0.071195
XLOC_001043	chr1	155966113	155972355	-	6242	chr3	88397129	88407931	+	10802	429	233	0.29607	0	0.872164	23.2464
XLOC_001046	chr1	156584262	156587138	-	2876	chr3	87833931	87836141	+	2210	974	943	0.01617	0	0.946667	0.094263
XLOC_001048	chr1	156681158	156682982	-	1824	chr3	87746443	87747996	+	1553	1020	1103	0.0391	0	0.917875	0.731367
XLOC_001050	chr1	157019845	157021546	-	1701	chr3	87388761	87389311	+	550	451	143	0.51852	0	0.231478	0
XLOC_001052	chr1	157256917	157257785	-	868						392			0	0.240528
XLOC_001053	chr1	158096903	158098261	-	1358						1175			210	0.488664
XLOC_001054	chr1	158099403	158110443	-	11040						2139			90	0.55517
XLOC_001061	chr1	159746249	159749163	-	2914	chr1	174564974	174567598	+	2624	817	616	0.14027	0	0.628848	1.73236
XLOC_001064	chr1	160901528	160904170	-	2642						575			105	0.044877
XLOC_001070	chr1	161732645	161736000	-	3355	chr1	172798016	172799832	+	1816	884	591	0.19864	0	0.581841	0.152849
XLOC_001072	chr1	162530262	162531146	-	884	chr1	172105214	172105865	+	651	299	144	0.34989	0	0.698304	0.234683
XLOC_001075	chr1	164879221	164881715	-	2494	chr1	170025022	170028786	+	3764	329	341	0.01791	0	0.570695	0
XLOC_001079	chr1	166864947	166877317	-	12370	chr1	168255051	168267567	+	12516	562	164	0.54821	0	6.08538	33.0268
XLOC_001080	chr1	167145153	167165029	-	19876	chr1	167957218	167971304	+	14086	1375	338	0.60537	141	0.085347	0.199966
XLOC_001081	chr1	167498602	167502878	-	4276	chr1	167711132	167713954	+	2822	1269	1339	0.02684	0	0.572251	0.022488
XLOC_001083	chr1	168370066	168391894	-	21828	chr1	166980486	167003813	+	23327	1837	864	0.36024	0	0.162162	0.343167
XLOC_001084	chr1	168433451	168464882	-	31431	chr1	166930087	166943183	+	13096	519	152	0.54694	0	0.679641	0.702599
XLOC_001085	chr1	168732602	168743728	-	11126	chr1	166694953	166707212	+	12259	418	234	0.28221	0	0.515582	0.304694
XLOC_001087	chr1	170240546	170253349	-	12803	chr1	165531832	165540597	+	8765	1724	1573	0.0458	0	0.219511	0.242148
XLOC_001097	chr1	174966628	174968522	-	1894	chr1	162143468	162144111	+	643	983	639	0.21208	0	0.544285	0.046369
XLOC_001098	chr1	175172363	175173985	-	1622	chr1	161957261	161958805	+	1544	775	764	0.00715	0	0	0.092363
XLOC_001099	chr1	175873897	175889649	-	15752	chr1	161283383	161289222	+	5839	657	476	0.15975	96	1.53297	0.145492
XLOC_001102	chr1	177362422	177546084	-	183662	chr1	159892810	160071451	+	178641	798	759	0.02505	0	0.817701	2.18092
XLOC_001125	chr1	184638175	184641354	-	3179	chr1	153687975	153689991	+	2016	561	171	0.53279	0	0.395441	0.224644
XLOC_001126	chr1	185527501	185597659	-	70158	chr1	152913653	152951930	+	38277	1614	976	0.24633	102	1.73832	13.5943
XLOC_001128	chr1	188674753	188680011	-	5258						733			114	0.053409
XLOC_001133	chr1	192486768	192536347	-	49579	chr1	146108807	146177001	+	68194	396	352	0.05882	0	0.788074	29.1948
XLOC_001134	chr1	192904812	192924493	-	19681	chr1	145677790	145702084	+	24294	2761	2959	0.03462	0	1.007	0.106415
XLOC_001137	chr1	195727481	195732530	-	5049						1401			0	0.263256
XLOC_001147	chr1	198776621	198796345	-	19724	chr1	139887973	139905944	+	17971	942	213	0.63117	0	0.104212	0.250692
XLOC_001148	chr1	198867622	198906558	-	38936	chr1	139795165	139829679	+	34514	2280	2387	0.02293	0	0.316175	0.058026
XLOC_001164	chr1	204001574	204010392	-	8818	chr1	135349309	135362028	+	12719	2084	1654	0.11503	228	0.137759	1.13059
XLOC_001166	chr1	205251238	205264218	-	12980	chr1	134234324	134244071	+	9747	490	43	0.83865	0	0.414351	5.5014
XLOC_001171	chr1	206296384	206306131	-	9747	chr1	133536600	133553588	-	16988	548	348	0.22321	0	18.4306	180.2
XLOC_001178	chr1	207574927	207589566	-	14639	chr1	197036313	197047501	+	11188	572	233	0.42112	0	1.85997	0.217946
XLOC_001181	chr1	207978670	207980881	-	2211	chr1	196858932	196860798	+	1866	1613	1450	0.05322	0	0.813974	0.145998
XLOC_001186	chr1	209701799	209741018	-	39219	chr1	195210956	195250016	+	39060	1071	573	0.30292	141	0.143735	0.120862
XLOC_001188	chr1	210463515	210466574	-	3059	chr1	194624909	194628321	+	3412	666	948	0.17472	90	0.284529	2.24896
XLOC_001189	chr1	211431655	211432110	-	455	chr1	193962389	193962810	+	421	295	270	0.04425	0	0.486594	0.115557
XLOC_001191	chr1	212398618	212458414	-	59796	chr1	193221272	193274198	+	52926	866	811	0.0328	0	1.19835	8.65756
XLOC_001192	chr1	212603321	212606095	-	2774						619			0	0.400552
XLOC_001193	chr1	212640157	212641085	-	928	chr1	193119822	193120491	+	669	359	293	0.10123	0	0.399847	0.131106
XLOC_001194	chr1	212679673	212688157	-	8484	chr1	193081174	193087383	+	6209	451	33	0.86364	129	0.665498	2.62196
XLOC_001195	chr1	212800568	212811902	-	11334	chr1	192962747	192979101	+	16354	10898	6170	0.27701	153	0.489419	0.117856
XLOC_001197	chr1	213028818	213031480	-	2662						2069			0	0.635282
XLOC_001199	chr1	213990569	214089305	-	98736	chr1	192072261	192168844	+	96583	5632	4992	0.06024	204	0.570899	0.069365
XLOC_001200	chr1	214427428	214452637	-	25209	chr1	191747687	191763904	+	16217	9496	6213	0.20899	0	1.0663	0.069625
XLOC_001204	chr1	219086098	219089526	-	3428	chr1	188098913	188101199	+	2286	390			0	0.171945
XLOC_001208	chr1	219582616	219632787	-	50171	chr1	187694237	187734827	+	40590	2009	812	0.42432	240	0.925238	20.2563
XLOC_001209	chr1	219608493	219615984	-	7491	chr1	187711067	187715496	+	4429	681	52	0.85812	0	0	0
XLOC_001211	chr1	220658445	220660385	-	1940	chr1	186869560	186870729	+	1169	390	277	0.16942	96	0.334604	0
XLOC_001212	chr1	221728933	221736978	-	8045	chr1	185997092	186002809	+	5717	1238	1061	0.07699	417	0.432174	0.033254
XLOC_001214	chr1	222054322	222151865	-	97543	chr1	185699680	185733179	+	33499	998	708	0.16999	0	0.349052	0.977679
XLOC_001215	chr1	222215046	222238105	-	23059	chr1	185611720	185630508	+	18788	562	206	0.46354	141	0.417957	0.385676
XLOC_001219	chr1	223266593	223269136	-	2543						568			120	0.355711
XLOC_001220	chr1	223564508	223566572	-	2064	chr1	184679441	184680517	+	1076	1719	1076	0.23005	0	0.091096	0.099252
XLOC_001225	chr1	224396448	224400981	-	4533	chr1	184185282	184197559	+	12277	962	438	0.37429	0	0.200026	2.49719
XLOC_001227	chr1	224623156	224624723	-	1567	chr1	183142786	183144545	-	1759	638	822	0.12603	180	1.69767	1.80277
XLOC_001228	chr1	224795998	224803922	-	7924						4135	3666	0.06012	0	0.53517
XLOC_001229	chr1	225071655	225072471	-	816						407			0	0.352691
XLOC_001230	chr1	225634944	225653045	-	18101	chr1	183793787	183804405	-	10618	1037	700	0.19401	0	1.09806	0.100808
XLOC_001243	chr1	229228561	229230652	-	2091	chr8	126297628	126298153	-	525	599	458	0.1334	150	0.271161	0
XLOC_001249	chr1	230774213	230776446	-	2233	chr8	127039928	127044125	-	4197	1038	2695	0.44388	252	0.420605	0
XLOC_001257	chr1	231658133	231664321	-	6188	chr8	127533745	127535342	-	1597	1124	62	0.89545	129	2.72833	0.54507
XLOC_001259	chr1	232862999	232878755	-	15756	chr8	128161902	128166597	-	4695	2945	929	0.52039	177	0.753285	0.531711
XLOC_001265	chr1	235087870	235105809	-	17939	chr8	129346724	129362943	-	16219	8061	6873	0.07955	0	0.295055	0.054087
XLOC_001266	chr1	235108773	235116505	-	7732	chr8	129365608	129373565	-	7957	578	388	0.19669	0	1.97084	1.00029
XLOC_001272	chr1	238643685	238649317	-	5632						1529	641	0.40922	0	3.41805
XLOC_001275	chr1	240078738	240080255	-	1517						443			0	1.13075
XLOC_001277	chr1	240821423	240821840	-	417						303			0	0
XLOC_001278	chr1	240902676	240906911	-	4235						594	113	0.68034	120	3.69078
XLOC_001287	chr1	244232121	244256328	-	24207	chr1	179391924	179410195	-	18271	468	298	0.22193	0	0.151553	3.0823
XLOC_001293	chr1	246948951	246949406	-	455						305	103	0.4951	0	0.222405
XLOC_001300	chr2	196544	211224	+	14680	chr12	31652777	31671108	-	18331	7539	3052	0.42366	0	0.083085	0.040417
XLOC_001306	chr2	495730	496628	+	898						724			120	0.270364
XLOC_001308	chr2	557824	578145	+	20321	chr12	31331110	31344346	-	13236	1845	229	0.77917	153	0.332428	0.221753
XLOC_001309	chr2	663813	667014	+	3201	chr12	31278876	31280003	-	1127	3201	1127	0.47921	0	1.42455	0.030725
XLOC_001310	chr2	693210	697855	+	4645	chr12	31253317	31255634	-	2317	1144	152	0.76543	0	0.536127	0.189747
XLOC_001313	chr2	1556216	1558473	+	2257						867			156	22.3093
XLOC_001314	chr2	1562697	1567389	+	4692						1251			201	1.01705
XLOC_001317	chr2	1753645	1757701	+	4056						1729			0	0.381219
XLOC_001320	chr2	2875155	2876529	+	1374	chr12	29789310	29791191	-	1881	844	768	0.04715	0	0.123692	0.120698
XLOC_001323	chr2	3606021	3609462	+	3441						1449			168	1.87759
XLOC_001327	chr2	6072818	6142124	+	69306	chr12	27808551	27845318	-	36767	18992	12969	0.18845	99	1.73455	0.015662
XLOC_001329	chr2	7213466	7215379	+	1913						247			96	1.43423
XLOC_001331	chr2	7865832	7870836	+	5004	chr12	26507349	26511617	-	4268	430	117	0.57221	0	3.26052	0.603125
XLOC_001332	chr2	8279531	8283399	+	3868	chr12	26209150	26214903	-	5753	447	846	0.30858	102	0.42007	0.252831
XLOC_001338	chr2	9705798	9715751	+	9953	chr12	21385479	21389987	+	4508	1301	522	0.42732	102	0.494699	1.35958
XLOC_001339	chr2	9778900	9789568	+	10668	chr12	21432278	21444018	+	11740	832	1244	0.19846	252	0.221648	0.640212
XLOC_001342	chr2	10589125	10597755	+	8630	chr12	17546084	17550317	-	4233	4338	1329	0.53097	0	0.367	0.229262
XLOC_001349	chr2	11485210	11489408	+	4198	chr12	16896759	16901312	-	4553	831	949	0.06629	162	0.471103	0.211148
XLOC_001351	chr2	11547408	11561393	+	13985	chr12	16842054	16848826	-	6772	379			0	0.889599
XLOC_001352	chr2	11566018	11566997	+	979						870			90	0.368989
XLOC_001354	chr2	12246709	12271674	+	24965	chr12	16310425	16331412	-	20987	478	235	0.34081	0	0.136502	3.63557
XLOC_001356	chr2	13141014	13414889	+	273875	chr12	15336295	15551243	-	214948	1122	1465	0.13259	117	3.32295	2.23872
XLOC_001357	chr2	13424959	13430867	+	5908						512			165	0.209552
XLOC_001361	chr2	15703524	15713992	+	10468	chr12	13264069	13273437	-	9368	674	50	0.86188	0	0.154891	4.84779
XLOC_001362	chr2	15830905	15859085	+	28180	chr12	13145482	13166597	-	21115	1963	965	0.34085	0	0.312445	0.073125
XLOC_001363	chr2	15922617	15926006	+	3389	chr12	13095000	13099180	-	4180	1122	664	0.25644	129	0.193464	0.053689
XLOC_001364	chr2	16060520	16076286	+	15766	chr12	12957670	12973585	-	15915	1232	1165	0.02795	0	0.040823	1.84743
XLOC_001366	chr2	16383697	16385494	+	1797	chr12	12701898	12703743	-	1845	637	1215	0.3121	0	0	0.023738
XLOC_001368	chr2	16535523	16613970	+	78447	chr12	12512339	12579957	-	67618	477	66	0.75691	108	0.848084	13.3129
XLOC_001371	chr2	17349863	17351882	+	2019	chr12	11845639	11848729	-	3090	307	220	0.16509	0	0.231032	1.3825
XLOC_001374	chr2	18825463	19125152	+	299689	chr12	10035710	10315771	-	280061	310	256	0.09541	0	13.3681	161.132
XLOC_001376	chr2	19296230	19299842	+	3612	chr12	9889571	9892871	-	3300	708	265	0.45529	0	0.419559	0
XLOC_001377	chr2	19675210	19719465	+	44255	chr12	9404417	9465851	-	61434	1000	845	0.08401	186	0.260991	5.86062
XLOC_001378	chr2	19911475	19917337	+	5862	chr12	9212317	9219077	-	6760	443	759	0.2629	135	2.94572	0.477397
XLOC_001379	chr2	20068614	20084807	+	16193						4688	1096	0.62102	222	0.559788
XLOC_001386	chr2	21267100	21268881	+	1781	chr12	7982541	7984305	-	1764	1481	1663	0.05789	138	0.659555	0.020822
XLOC_001391	chr2	22421607	22422083	+	476	chr12	6821218	6821695	-	477	272	269	0.00555	0	0.095953	0
XLOC_001393	chr2	22759261	22762702	+	3441	chr12	6338384	6348528	-	10144	620	366	0.25761	0	0.63143	0.09461
XLOC_001398	chr2	25194980	25262561	+	67581	chr12	4040834	4082574	-	41740	5593	3773	0.19432	207	0.494637	0.621171
XLOC_001399	chr2	25427181	25432071	+	4890						466			0	0.120378
XLOC_001401	chr2	26521474	26529191	+	7717						2513			0	0.816765
XLOC_001406	chr2	27938768	27980489	+	41721	chr5	31873910	31905442	+	31532	4034	2584	0.2191	0	1.44286	0.641754
XLOC_001407	chr2	28582744	28585818	+	3074	chr5	32407142	32410101	+	2959	356	339	0.02446	135	0.327833	0
XLOC_001412	chr2	30555415	30583316	+	27901	chr17	73349854	73372530	+	22676	4118	2688	0.21011	0	2.99437	0.158921
XLOC_001414	chr2	31046572	31083082	+	36510	chr17	73761394	73802096	+	40702	1278	895	0.17625	0	0.428859	0.079663
XLOC_001417	chr2	32534099	32538803	+	4704						3273			0	5.64494
XLOC_001418	chr2	33050393	33171200	+	120807	chr17	75266340	75404171	+	137831	5400	4906	0.04793	0	0.617807	0.107877
XLOC_001425	chr2	35024916	35388178	+	363262	chr17	77091359	77376888	+	285529	580	50	0.84127	108	29.4705	50.1936
XLOC_001426	chr2	35041548	35042319	+	771						558			0	0
XLOC_001428	chr2	37552099	37553940	+	1841	chr17	79420273	79421955	+	1682	887	679	0.13282	0	0.794449	0.227532
XLOC_001430	chr2	37827039	37839573	+	12534	chr17	79685123	79691097	-	5974	1210	405	0.49845	156	1.32891	0
XLOC_001432	chr2	38095118	38099030	+	3912	chr17	79955750	79962611	+	6861	377	292	0.12706	0	0.204417	1.32572
XLOC_001435	chr2	38635913	38636326	+	413	chr17	80319120	80319334	+	214	299	87	0.54922	0	1.63345	0
XLOC_001436	chr2	38658395	38673752	+	15357	chr17	80336487	80351659	+	15172	738	606	0.09821	0	4.31361	3.20224
XLOC_001441	chr2	42103894	42121185	+	17291	chr17	83449582	83469914	+	20332	2522	2413	0.02209	0	0.444989	0.258304
XLOC_001446	chr2	43055062	43180319	+	125257	chr17	84266283	84377565	+	111282	1385	5891	0.6193	351	3.41063	0.519415
XLOC_001447	chr2	43160632	43167334	+	6702	chr17	84361172	84366992	+	5820	298	258	0.07194	132	0	0
XLOC_001448	chr2	43357102	43358647	+	1545	chr17	84514786	84516080	+	1294	481	460	0.02232	0	0.416402	1.12914
XLOC_001453	chr2	45396701	45402931	+	6230	chr17	86199918	86205828	+	5910	1022	701	0.1863	123	0.43598	3.70475
XLOC_001455	chr2	46656275	46671219	+	14944	chr17	87273137	87283785	+	10648	1188	849	0.16642	0	1.14238	0.081571
XLOC_001457	chr2	46874504	46877634	+	3130	chr17	87440536	87443694	+	3158	1222	1458	0.08806	0	1.16083	0.18164
XLOC_001458	chr2	47038721	47086145	+	47424	chr17	87572853	87611059	+	38206	2408	1910	0.11533	0	0.594983	0.145035
XLOC_001459	chr2	47043806	47050498	+	6692	chr17	87578230	87581302	+	3072	1742	805	0.36788	141	0	0
XLOC_001462	chr2	47452932	47466364	+	13432	chr17	87888941	87901982	+	13041	677	701	0.01742	123	0.151778	0.098793
XLOC_001464	chr2	48133220	48135298	+	2078	chr17	88464946	88467414	+	2468	1252	1607	0.12417	0	1.49049	2.39315
XLOC_001466	chr2	48996105	49003658	+	7553	chr17	89196764	89202564	+	5800	348	316	0.04819	0	6.05302	0.111655
XLOC_001473	chr2	54609064	54610925	+	1861	chr11	30268304	30271233	-	2929	403	315	0.12256	0	0.831991	1.19796
XLOC_001474	chr2	54659979	54661074	+	1095	chr11	30188915	30189759	-	844	218	87	0.42951	0	0.946936	5.8266
XLOC_001475	chr2	54662632	54673837	+	11205	chr11	30175763	30187312	-	11549	362	541	0.19823	0	2.31666	15.1462
XLOC_001477	chr2	54937396	54938672	+	1276	chr11	29948314	29948653	-	339	390			0	0.381769
XLOC_001478	chr2	54950820	54951863	+	1043	chr11	29924911	29925965	-	1054	272	259	0.02448	0	0.149288	0.10407
XLOC_001482	chr2	56750279	56816630	+	66351	chr11	28213773	28247354	+	33581	277	261	0.02974	0	0.416804	44.1176
XLOC_001483	chr2	57928210	57940316	+	12106	chr11	26904018	26926190	-	22172	954	295	0.52762	0	0.615545	0.343671
XLOC_001484	chr2	57947953	57953284	+	5331	chr11	26890983	26897095	-	6112	638	621	0.0135	0	0.327262	0.049756
XLOC_001486	chr2	59246797	59288575	+	41778	chr11	25447676	25501676	-	54000	754	1068	0.17234	0	0.844901	0.190193
XLOC_001493	chr2	62642328	62691205	+	48877	chr11	22510883	22529266	-	18383	660	253	0.44578	0	1.34114	3.37692
XLOC_001496	chr2	64501018	64550940	+	49922	chr11	20818113	20858259	-	40146	647	170	0.58384	153	3.94697	4.77943
XLOC_001498	chr2	64834108	64843614	+	9506	chr11	20565225	20573774	-	8549	1976	1259	0.22164	270	0.02625	0.214737
XLOC_001500	chr2	65257848	65278178	+	20330	chr11	20152224	20182903	-	30679	2348	369	0.72838	375	3.18115	20.24
XLOC_001501	chr2	65677486	65682831	+	5345	chr11	19803551	19806960	-	3409	445	557	0.11178	0	2.69789	1.53605
XLOC_001504	chr2	65952595	66016024	+	63429	chr11	19508290	19566484	-	58194	2606	1180	0.37665	93	0.38057	0.99697
XLOC_001505	chr2	66124755	66126649	+	1894	chr11	19391456	19394822	-	3366	426	726	0.26042	0	0.275695	0.041476
XLOC_001506	chr2	66305393	66312403	+	7010	chr11	19230391	19243585	-	13194	849	443	0.31424	0	0.078985	1.06799
XLOC_001508	chr2	66892906	66957289	+	64383	chr11	18615132	18717215	-	102083	3626	3547	0.01101	0	1.5885	0.130657
XLOC_001512	chr2	67313577	67523207	+	209630	chr11	17931882	18219154	-	287272	1479	1428	0.01754	90	1.49371	1.45776
XLOC_001515	chr2	67789198	67831420	+	42222	chr11	17643023	17668100	-	25077	1962	1077	0.29121	0	0.625208	0.054936
XLOC_001517	chr2	69059175	69064856	+	5681						683			0	2.06347
XLOC_001526	chr2	71923939	72005321	+	81382	chr6	84172278	84249402	+	77124	341	338	0.00442	0	1.73049	1.77458
XLOC_001531	chr2	74212258	74213470	+	1212	chr6	83405113	83406308	-	1195	390	387	0.00386	0	0.898735	0.198523
XLOC_001532	chr2	74375171	74378011	+	2840	chr6	83297920	83299377	-	1457	2639	1072	0.42226	0	1.8338	0.168534
XLOC_001537	chr2	75145003	75170618	+	25615	chr6	82612222	82652941	-	40719	9795	14855	0.20527	213	0.435651	0.172302
XLOC_001539	chr2	75572394	75575381	+	2987						1285			0	0.029986
XLOC_001542	chr2	78143032	78145135	+	2103	chr6	79550031	79552226	-	2195	662	227	0.48931	0	2.01066	0.127055
XLOC_001543	chr2	78315855	78354932	+	39077	chr6	79364197	79400687	-	36490	1282	418	0.50824	201	0.193402	0.36446
XLOC_001544	chr2	78769291	78793155	+	23864						355	116	0.50743	0	0.808705
XLOC_001545	chr2	81928461	81929613	+	1152	chr6	75777765	75778562	-	797	218	43	0.6705	0	0.538743	0
XLOC_001546	chr2	82049488	82077656	+	28168	chr6	75652229	75667304	-	15075	464	621	0.1447	0	0.091618	1.69172
XLOC_001550	chr2	85190234	85194331	+	4097						930			0	2.77605
XLOC_001556	chr2	85938745	85943145	+	4400	chr6	72224147	72227083	-	2936	950	101	0.8078	0	1.39629	0.669194
XLOC_001558	chr2	86116277	86144322	+	28045	chr6	72006514	72047451	-	40937	6714	4430	0.20495	0	1.71159	0.176075
XLOC_001560	chr2	88045925	88047354	+	1429	chr17	12568040	12571206	+	3166	315	198	0.22807	96	0.411671	0
XLOC_001562	chr2	88927346	88931337	+	3991	chr6	70789708	70794198	-	4490	1324	895	0.19333	99	1.70527	0.144175
XLOC_001564	chr2	89108796	89116314	+	7518	chr2	127530019	127534783	+	4764	1033	372	0.47046	93	2.49812	11.1525
XLOC_001574	chr2	95924700	95925721	+	1021						738			0	0.234794
XLOC_001583	chr2	97948298	97957475	+	9177	chr2	17507312	17512007	-	4695	2757	633	0.62655	192	0.910702	0.055739
XLOC_001587	chr2	99348117	99368056	+	19939	chr1	37598260	37616745	+	18485	315	71	0.63212	0	8.46617	3.97553
XLOC_001591	chr2	101355698	101363828	+	8130	chr1	39177987	39182089	+	4102	2129			216	0.619072
XLOC_001592	chr2	101768121	101771872	+	3751	chr1	39535811	39540240	+	4429	2476	3256	0.13608	156	0.399066	0.015596
XLOC_001593	chr2	102095851	102103284	+	7433	chr1	39788916	39793117	+	4201	390	243	0.23223	0	0	0.132754
XLOC_001595	chr2	102604264	102605462	+	1198	chr1	40136967	40137218	+	251	534	126	0.61818	129	0.841849	1.07283
XLOC_001596	chr2	102661124	102674449	+	13325	chr1	40207188	40220399	+	13211	737	750	0.00874	0	0.61583	0.47396
XLOC_001602	chr2	105050756	105129219	+	78463	chr1	42318618	42420384	+	101766	1934	1808	0.03367	0	3.01659	1.03369
XLOC_001603	chr2	105199609	105201812	+	2203	chr1	42497354	42501497	+	4143	451	702	0.21769	93	0.144674	0.15213
XLOC_001605	chr2	105320215	105321967	+	1752	chr1	42598226	42600017	+	1791	709	688	0.01503	0	0.2601	0
XLOC_001608	chr2	105720870	105721924	+	1054	chr1	42966741	42966867	+	126	528	126	0.61468	120	0.076906	0
XLOC_001609	chr2	105760570	105761882	+	1312	chr1	43010015	43011223	+	1208	1009	980	0.01458	0	0.083075	0.031529
XLOC_001612	chr2	107002768	107007850	+	5082	chr17	12574980	12581603	+	6623	699	458	0.2083	0	3.14421	0.221753
XLOC_001616	chr2	107318212	107417250	+	99038						659	145	0.6393	117	2.17823
XLOC_001619	chr2	108145942	108172782	+	26840	chr17	54778942	54804525	-	25583	1660	143	0.84138	0	2.6174	29.8371
XLOC_001625	chr2	112248849	112268567	+	19718	chr2	128251280	128261054	+	9774	2578	1095	0.40376	0	0.126249	5.01928
XLOC_001626	chr2	112365417	112370095	+	4678						792			0	0.972126
XLOC_001628	chr2	113436286	113438656	+	2370	chr2	129050044	129051604	+	1560	337	233	0.18246	0	0.294651	3.05125
XLOC_001631	chr2	114261181	114273062	+	11881	chr19	24958670	24970442	-	11772	2825	1715	0.24449	0	0.323352	0.088831
XLOC_001632	chr2	114334958	114336486	+	1528	chr6	121449466	121450734	+	1268	1289	866	0.19629	135	0.076816	0
XLOC_001634	chr2	114737145	114740835	+	3690						1155			0	6.92587
XLOC_001635	chr2	118421686	118424589	+	2903	chr1	123662274	123663688	-	1414	2790	1345	0.34946	210	0.070159	0
XLOC_001636	chr2	118593925	118596965	+	3040						2111	43	0.96007	99	0.774003
XLOC_001637	chr2	118802135	118816029	+	13894	chr1	123275958	123298712	-	22754	1177	2005	0.26021	123	0.133046	0.094105
XLOC_001640	chr2	121060713	121085769	+	25056	chr1	121341805	121359220	-	17415	400	28	0.86916	0	1.7377	43.8622
XLOC_001641	chr2	121334544	121345836	+	11292	chr1	121070124	121086355	-	16231	2165	3407	0.2229	0	0.621788	0.069464
XLOC_001642	chr2	121343386	121362263	+	18877	chr1	121049347	121073897	-	24550	1285	584	0.37507	159	0.474178	0.231468
XLOC_001644	chr2	121807049	121808265	+	1216						635			0	0.041101
XLOC_001646	chr2	122407225	122409245	+	2020	chr1	120284130	120285850	-	1720	1935	1639	0.08282	0	2.73507	0.087326
XLOC_001649	chr2	123223598	123229276	+	5678	chr1	100602612	100606178	+	3566	855	102	0.78683	243	0.091576	5.88047
XLOC_001655	chr2	124179063	124203757	+	24694	chr1	117024136	117056206	+	32070	525	361	0.1851	0	0.372844	1.48127
XLOC_001659	chr2	127475775	127511762	+	35987						707			222	1.6424
XLOC_001666	chr2	129622178	129626301	+	4123	chr1	35697320	35699908	-	2588	1086	1996	0.29526	0	0	0.013504
XLOC_001668	chr2	130345373	130351825	+	6452						6098			0	0.400175
XLOC_001669	chr2	130352022	130354693	+	2671						698			0	0.336522
XLOC_001674	chr2	132160449	132167680	+	7231	chr13	19739337	19740702	-	1365	4958	1365	0.56824	0	1.37655	0.07835
XLOC_001676	chr2	132301071	132310702	+	9631						715			0	0.235368
XLOC_001680	chr2	133092596	133096192	+	3596						808			0	1.00133
XLOC_001682	chr2	136770034	136774067	+	4033	chr1	130350408	130356988	+	6580	558	712	0.12126	0	0.323706	1.27494
XLOC_001683	chr2	136835461	136836083	+	622						469			0	0
XLOC_001684	chr2	136846225	136869280	+	23055	chr1	130457735	130481920	+	24185	901	1532	0.25935	0	0.796588	0.596649
XLOC_001686	chr2	138859453	138863475	+	4022	chr2	23724549	23725325	-	776	553	403	0.1569	0	0.046395	0.065715
XLOC_001690	chr2	140017508	140021549	+	4041						1003			0	0.234189
XLOC_001691	chr2	140123734	140136717	+	12983	chr2	39448320	39458577	+	10257	557	1102	0.32851	0	0.210855	1.21138
XLOC_001698	chr2	146672657	146688714	+	16057	chr2	46508429	46521466	+	13037	747	787	0.02608	0	0.017173	0.070054
XLOC_001701	chr2	150143467	150146685	+	3218	chr2	49867369	49869232	+	1863	883	504	0.27325	0	0.103451	0
XLOC_001703	chr2	150683557	150704743	+	21186	chr2	50409433	50423412	+	13979	447	3775	0.78825	123	0.210933	0.013452
XLOC_001704	chr2	151026009	151157594	+	131585	chr2	50720577	50810850	+	90273	588	158	0.57641	261	3.32245	6.42122
XLOC_001707	chr2	151468894	151492179	+	23285	chr2	51126114	51151307	+	25193	1683	1786	0.02969	105	1.08553	0.049691
XLOC_001710	chr2	153032564	153039439	+	6875	chr2	52601541	52603922	+	2381	628	695	0.05064	0	0.893521	0.085131
XLOC_001712	chr2	154168182	154189764	+	21582	chr2	53758568	53766017	+	7449	346			162	0.572347
XLOC_001715	chr2	156329467	156346085	+	16618	chr2	56033901	56043124	+	9223	1075	458	0.40248	0	0.048556	0.077037
XLOC_001719	chr2	157890361	157906713	+	16352	chr2	57661432	57679992	+	18560	1783	798	0.38164	171	0.673337	0.334571
XLOC_001720	chr2	158733218	158734099	+	881	chr2	58419918	58420824	+	906	276	295	0.03327	0	1.27508	0.089773
XLOC_001728	chr2	162101249	162105241	+	3992	chr2	61500227	61504062	+	3835	2057	2034	0.00562	0	4.38241	0
XLOC_001731	chr2	162949938	162951364	+	1426	chr2	62261913	62264809	+	2896	619	1895	0.50756	0	0.109333	0.018273
XLOC_001732	chr2	163175543	163176543	+	1000	chr2	62484604	62485563	+	959	300	277	0.03986	0	0.857246	0
XLOC_001738	chr2	166651360	166666520	+	15160	chr2	65963352	65977826	+	14474	779	668	0.07671	117	1.36682	0.159873
XLOC_001741	chr2	166931798	166938251	+	6453	chr2	66191936	66194193	+	2257	299			0	1.89205
XLOC_001743	chr2	169105103	169121783	+	16680	chr2	68311148	68319516	+	8368	247	77	0.52469	0	0.95098	3.957
XLOC_001744	chr2	169957252	169957720	+	468	chr2	69241431	69242096	+	665	307	265	0.07343	0	0.084052	0.111811
XLOC_001748	chr2	171627521	171638903	+	11382	chr2	70347441	70369889	+	22448	1758	3092	0.27505	108	2.32339	0.11411
XLOC_001749	chr2	171826455	171829764	+	3309						401			0	0.642811
XLOC_001755	chr2	172967733	172974710	+	6977	chr2	71384913	71389875	+	4962	950	559	0.25911	0	0.027162	0.053866
XLOC_001757	chr2	173162903	173232618	+	69715	chr2	71504080	71574036	+	69956	1270	928	0.1556	0	0.606239	0.421818
XLOC_001759	chr2	175190754	175195371	+	4617	chr2	73101531	73105822	+	4291	3435	3150	0.04328	0	0.040087	0.118661
XLOC_001763	chr2	177042908	177043737	+	829	chr2	74591034	74591806	+	772	658	606	0.04114	0	0.713958	0.049689
XLOC_001765	chr2	177502437	177520707	+	18270	chr2	74975561	74992623	+	17062	1380	1344	0.01322	0	0.633565	0.278112
XLOC_001767	chr2	177708258	177711096	+	2838	chr2	75181352	75186522	+	5170	224	153	0.18833	0	3.08762	0.698006
XLOC_001769	chr2	178417962	178424476	+	6514	chr2	75776875	75780639	+	3764	1050	56	0.89873	0	1.23039	0.636593
XLOC_001771	chr2	180138557	180150434	+	11877	chr2	77126191	77134364	+	8173	552	431	0.12309	105	0.327225	0.319796
XLOC_001772	chr2	180764786	180782371	+	17585	chr2	77695074	77713093	+	18019	395	289	0.15497	99	1.91895	0.493415
XLOC_001775	chr2	181940168	181941195	+	1027	chr2	78770125	78770793	+	668	360	312	0.07143	0	1.8731	0
XLOC_001776	chr2	181966658	182264280	+	297622	chr2	78796583	79046261	+	249678	2958	3014	0.00938	294	0.930343	0.689325
XLOC_001778	chr2	183982267	183983470	+	1203	chr2	80475428	80476294	+	866	239	81	0.49375	0	1.80182	0
XLOC_001780	chr2	186031528	186085106	+	53578	chr2	82338186	82370500	+	32314	950	524	0.28901	102	0.315937	0.660822
XLOC_001784	chr2	190405247	190406731	+	1484						553	83	0.73899	141	0.259575
XLOC_001787	chr2	192479790	192502235	+	22445	chr1	51571631	51594071	-	22440	729	559	0.13199	246	0.268509	0.215466
XLOC_001788	chr2	192559981	192563100	+	3119	chr1	51518320	51519434	-	1114	2784	1112	0.42916	0	2.43046	0.026646
XLOC_001789	chr2	192657514	192684976	+	27462	chr1	51382303	51412754	-	30451	832	683	0.09835	135	0.219584	0.723221
XLOC_001804	chr2	200704677	200708029	+	3352	chr1	57376516	57378611	+	2095	327	39	0.78689	150	0.620893	0.904688
XLOC_001809	chr2	202038290	202043285	+	4995						3375			0	2.06942
XLOC_001822	chr2	207731518	207733013	+	1495	chr1	63897770	63898927	+	1157	646	547	0.08298	0	0.311417	0.185344
XLOC_001823	chr2	207744135	207799719	+	55584	chr1	63916144	63947290	+	31146	1105	351	0.51786	0	1.03167	2.4595
XLOC_001824	chr2	208038357	208087514	+	49157	chr1	64175826	64237940	+	62114	554	558	0.0036	0	6.1479	1.36509
XLOC_001825	chr2	208091672	208093032	+	1360	chr1	64242481	64243643	+	1162	551	383	0.17987	0	0.093243	0
XLOC_001826	chr2	208104373	208110611	+	6238	chr1	64256114	64262852	+	6738	1204	1477	0.10183	129	0.355425	0.024136
XLOC_001833	chr2	213660044	213683988	+	23944	chr1	69389004	69407928	+	18924	1498	1309	0.06733	105	0.313608	0.058692
XLOC_001835	chr2	214032965	214039035	+	6070	chr1	69756123	69761426	+	5303	473	505	0.03272	108	0.2483	1.79754
XLOC_001836	chr2	215674994	215698897	+	23903	chr1	71149840	71184077	+	34237	347	306	0.06279	0	0.784784	0.565802
XLOC_001846	chr2	216318429	216328594	+	10165	chr1	71720889	71730514	+	9625	890	613	0.1843	0	0.703796	0.201226
XLOC_001848	chr2	216395169	216410249	+	15080	chr1	71801663	71815130	+	13467	503	644	0.12293	0	0	0.23656
XLOC_001849	chr2	216397855	216578618	+	180763	chr1	71803482	71985683	+	182201	2054	2293	0.05498	174	1.10546	1.01065
XLOC_001851	chr2	216582765	216584147	+	1382	chr1	71988225	71989799	+	1574	648	605	0.03432	111	0.401106	0
XLOC_001856	chr2	217374175	217394310	+	20135	chr1	72763079	72776399	+	13320	1002	623	0.23323	0	10.0298	1.48777
XLOC_001857	chr2	217398739	217443933	+	45194	chr1	72780179	72820534	+	40355	454	321	0.17161	0	0.997015	5.52893
XLOC_001864	chr2	218147406	218200843	+	53437	chr1	73438108	73489823	+	51715	637	564	0.06078	0	4.47407	0.119838
XLOC_001865	chr2	218851518	218858457	+	6939	chr1	74123937	74129301	+	5364	607	451	0.14745	207	3.99432	2.0513
XLOC_001866	chr2	219838968	219844350	+	5382	chr1	74921097	74926518	+	5421	3590	3293	0.04315	129	3.37326	0.021652
XLOC_001872	chr2	221495106	221498693	+	3587	chr1	76601329	76609229	+	7900	367	877	0.40997	0	0.274081	0.060887
XLOC_001874	chr2	221655797	221662613	+	6816	chr1	76774636	76779043	+	4407	512	448	0.06667	0	0.528729	0.078756
XLOC_001880	chr2	223605211	223642292	+	37081	chr1	78559679	78573188	+	13509	728	78	0.80645	0	1.46167	10.4039
XLOC_001892	chr2	229554324	229579362	+	25038	chr1	83733611	83754029	+	20418	438	197	0.37953	0	2.83038	1.95903
XLOC_001894	chr2	230989749	231032210	+	42461	chr1	87441459	87470658	+	29199	823	415	0.32956	0	22.4352	24.3482
XLOC_001897	chr2	231751214	231769231	+	18017	chr1	87814334	87832779	+	18445	2393	2693	0.05899	0	0.063051	0.128582
XLOC_001903	chr2	235591336	235632116	+	40780	chr1	90746470	90776347	+	29877	646	293	0.37593	99	0.020953	0.403863
XLOC_001904	chr2	236086539	236087549	+	1010						663			171	0.157461
XLOC_001907	chr2	238059251	238061515	+	2264						1026			102	0.158309
XLOC_001909	chr2	238130857	238134992	+	4135	chr1	92591864	92594514	+	2650	266	275	0.01664	0	0.289719	0.096302
XLOC_001910	chr2	238135862	238166293	+	30431	chr1	92595049	92617475	+	22426	365	214	0.26079	102	1.07542	3.08486
XLOC_001916	chr2	239463089	239469165	+	6076	chr1	93506459	93508611	+	2152	557	273	0.34217	345	3.74853	0
XLOC_001920	chr2	241625414	241628617	+	3203						1557			0	0.556371
XLOC_001922	chr2	242786531	242787188	+	657	chr1	95932056	95932534	+	478	571	383	0.19706	0	0.715308	0.465395
XLOC_001924	chr2	243001270	243002921	+	1651						575			0	1.00293
XLOC_001926	chr2	292147	293374	-	1227	chr12	31560089	31565737	+	5648	707	436	0.2371	0	0.812137	0.857299
XLOC_001927	chr2	305840	309379	-	3539						853	409	0.35182	204	0.351864
XLOC_001928	chr2	490844	492693	-	1849						670			0	2.05059
XLOC_001929	chr2	554474	559467	-	4993						920	462	0.3314	0	0.184396
XLOC_001932	chr2	724965	731224	-	6259						706			0	1.18296
XLOC_001933	chr2	739587	740177	-	590						473			0	0.524189
XLOC_001934	chr2	740303	741130	-	827						386			0	0.676143
XLOC_001935	chr2	747657	748673	-	1016						920			0	0.29787
XLOC_001936	chr2	779837	864112	-	84275						1520	343	0.63178	270	1.67412
XLOC_001937	chr2	895984	897649	-	1665	chr12	31098898	31101042	+	2144	383	157	0.41852	0	0.545151	0.489353
XLOC_001946	chr2	2838035	2842163	-	4128						574	260	0.3765	138	0.35048
XLOC_001950	chr2	3135352	3149551	-	14199	chr12	29588052	29592644	+	4592	952	631	0.20278	0	0.510687	0
XLOC_001952	chr2	3579404	3584463	-	5059						1530			0	1.27937
XLOC_001953	chr2	3616112	3622828	-	6716						2891	240	0.84669	0	0.585241
XLOC_001954	chr2	4004879	4021671	-	16792	chr12	29105190	29121110	+	15920	3675	4032	0.04632	0	2.07373	0.092197
XLOC_001956	chr2	4675756	4703812	-	28056	chr12	28810234	28821672	+	11438	3161	1481	0.36191	0	1.44078	0.210428
XLOC_001958	chr2	5741871	5831918	-	90047	chr12	28027972	28109369	+	81397	3170	967	0.53251	0	0.432241	0.44239
XLOC_001960	chr2	5950772	5952728	-	1956	chr12	27951475	27953496	+	2021	743	876	0.08215	0	0.351267	0.098033
XLOC_001961	chr2	6453085	6465778	-	12693	chr12	27562908	27568832	+	5924	579	482	0.09142	0	0.067614	0.070113
XLOC_001963	chr2	6766240	6775067	-	8827	chr12	27325133	27334308	+	9175	1718	875	0.32511	0	0.14432	0.174108
XLOC_001964	chr2	6775744	6791019	-	15275	chr12	27308531	27323654	+	15123	2037	2004	0.00817	126	1.57594	0.079936
XLOC_001966	chr2	6968644	6973662	-	5018						1791	417	0.62228	0	0.30602
XLOC_001971	chr2	8007543	8009432	-	1889	chr12	26401498	26401740	+	242	683	181	0.58102	114	0.382125	0
XLOC_001973	chr2	8062555	8418214	-	355659	chr12	26085754	26372668	+	286914	2728	249	0.83272	0	0.417886	1.0825
XLOC_001974	chr2	8147901	8523751	-	375850	chr12	26001178	26299116	+	297938	5303	1414	0.57898	102	0.760103	0.367331
XLOC_001979	chr2	9246671	9250451	-	3780	chr12	25428151	25431781	+	3630	889	799	0.05332	114	0.393936	0.037686
XLOC_001980	chr2	9344858	9346598	-	1740	chr12	24328763	24330432	+	1669	1456	1397	0.02068	0	0.994849	0.025518
XLOC_001983	chr2	10145572	10149991	-	4419	chr12	25308385	25312024	-	3639	951	278	0.5476	129	1.97604	0.126917
XLOC_001984	chr2	10174463	10177284	-	2821	chr12	25326930	25327682	-	752	699	334	0.35334	183	0.317371	0
XLOC_001990	chr2	12675861	12805597	-	129736	chr12	15884761	15991658	+	106897	283			0	1.55221
XLOC_001992	chr2	13106912	13147138	-	40226	chr12	15542865	15571880	+	29015	2381	2146	0.05191	0	0.443937	0.260296
XLOC_002002	chr2	16636334	16659842	-	23508	chr12	12452357	12485274	+	32917	417	291	0.17797	0	0.180116	3.66993
XLOC_002003	chr2	18604799	18606570	-	1771	chr12	10556822	10558597	+	1775	432	290	0.19668	0	0.089597	0
XLOC_002007	chr2	20251894	20254219	-	2325	chr12	8927789	8928387	+	598	535	400	0.14439	0	0.658576	0.413496
XLOC_002009	chr2	20678462	20680000	-	1538	chr12	8477061	8478971	+	1910	480	659	0.15716	0	0.33674	0.044962
XLOC_002010	chr2	20724741	20739937	-	15196	chr12	8435658	8451074	+	15416	3279	2902	0.06099	0	1.41087	0.132371
XLOC_002012	chr2	21316934	21319427	-	2493	chr12	7928017	7930759	+	2742	951	1086	0.06627	0	1.02713	0.825106
XLOC_002018	chr2	23240996	23421927	-	180931	chr12	5593766	5789880	+	196114	1690	1237	0.15477	0	0.770652	4.00601
XLOC_002021	chr2	23580386	23583247	-	2861	chr12	5410256	5412698	+	2442	533	522	0.01043	0	0.145238	0
XLOC_002022	chr2	23597677	23604170	-	6493	chr12	5387517	5394550	+	7033	1196	1067	0.057	96	0.21822	0
XLOC_002024	chr2	23957294	23958476	-	1182	chr12	5068353	5069056	+	703	257	92	0.47278	0	0.652631	0
XLOC_002026	chr2	25956628	25959457	-	2829	chr12	3507724	3510809	+	3085	265	193	0.15721	0	18.5951	1.05246
XLOC_002027	chr2	26894121	26897332	-	3211	chr5	30869932	30874017	-	4085	567	469	0.09459	105	0.070959	0.760111
XLOC_002032	chr2	28646220	28646862	-	642	chr5	32464915	32465647	-	732	248	233	0.03119	0	6.26508	0.36857
XLOC_002035	chr2	28931818	28959071	-	27253	chr5	32716536	32748912	-	32376	1509	1461	0.01616	0	0.929356	12.8923
XLOC_002040	chr2	30515649	30523357	-	7708	chr17	73319839	73325630	-	5791	1431	1141	0.11275	225	1.04029	0.077782
XLOC_002041	chr2	30566101	30627001	-	60900	chr17	73360526	73413897	-	53371	1839	400	0.6427	0	6.97014	6.33425
XLOC_002042	chr2	31935274	31990384	-	55110	chr17	74451774	74482378	-	30604	239	175	0.15459	0	0.928211	5.04071
XLOC_002043	chr2	31990951	31997991	-	7040	chr17	74483785	74486903	-	3118	254	161	0.2241	0	0.359633	3.83836
XLOC_002044	chr2	32018891	32029049	-	10158						418	60	0.74895	0	0.509043
XLOC_002048	chr2	36581892	36582644	-	752	chr17	78598595	78599321	-	726	646	644	0.00155	252	4.35984	0.262378
XLOC_002049	chr2	38053389	38103451	-	50062	chr17	79907788	79965704	-	57916	3072	2388	0.12527	177	0.370816	0.070759
XLOC_002054	chr2	38767122	38769283	-	2161	chr17	80423392	80426586	-	3194	1991	3000	0.20216	0	0.210505	0.011542
XLOC_002055	chr2	39010341	39012094	-	1753	chr17	80628589	80628982	-	393	1016	117	0.79347	135	2.38676	1.54417
XLOC_002059	chr2	42242764	42252442	-	9678	chr17	83588125	83596749	-	8624	346	328	0.02671	0	0.926901	0.108687
XLOC_002063	chr2	42615498	42652207	-	36709	chr17	83942901	83972716	-	29815	679	416	0.24018	135	2.94048	1.38102
XLOC_002066	chr2	43028633	43038968	-	10335	chr17	84255574	84261965	-	6391	1509	845	0.28207	0	2.73739	0.189577
XLOC_002067	chr2	43199537	43233380	-	33843	chr17	84395209	84414101	-	18892	1200	966	0.10803	0	0.962123	2.22244
XLOC_002070	chr2	43324883	43370236	-	45353	chr17	84494573	84523006	-	28433	1330	788	0.2559	93	0.767928	1.08421
XLOC_002071	chr2	43401091	43411668	-	10577	chr17	84544768	84550804	-	6036	300	231	0.12994	0	2.60065	3.2975
XLOC_002075	chr2	45148215	45166338	-	18123	chr17	85999414	86017770	-	18356	2522	2333	0.03893	0	0.154884	0.057767
XLOC_002076	chr2	45167292	45169012	-	1720	chr17	86018665	86020345	-	1680	1151	1149	0.00087	0	0.014565	0.522026
XLOC_002077	chr2	45240352	45240807	-	455	chr17	86091236	86091676	-	440	367	348	0.02657	162	0.154609	0.170017
XLOC_002078	chr2	45392008	45550518	-	158510	chr17	86195563	86323286	-	127723	4792	2959	0.23649	0	0.273986	0.523328
XLOC_002079	chr2	45536619	45538463	-	1844						1579			0	0
XLOC_002085	chr2	46726368	46727385	-	1017	chr17	87336080	87337253	-	1173	1017	1173	0.07123	0	0.205303	0.030391
XLOC_002087	chr2	46909763	46910666	-	903	chr17	87490114	87490632	-	518	587	512	0.06824	0	0.314156	0
XLOC_002089	chr2	47079158	47080635	-	1477	chr17	87604503	87605090	-	587	652	422	0.21415	0	0.10285	0
XLOC_002094	chr2	51559799	51571385	-	11586	chr17	91895474	91913295	-	17821	717	699	0.01271	0	0.215933	0.944433
XLOC_002095	chr2	52721825	52727890	-	6065	chr17	93032540	93034273	-	1733	639	215	0.49649	0	0.122531	0.16581
XLOC_002096	chr2	52918446	52925210	-	6764	chr17	93209412	93210560	-	1148	563			0	0.463572
XLOC_002098	chr2	55378212	55397546	-	19334	chr11	29479206	29514942	+	35736	347			0	0.93617
XLOC_002100	chr2	56301788	56317511	-	15723	chr11	28556139	28570524	+	14385	3469	2416	0.17893	0	0.011285	0.066305
XLOC_002102	chr2	57541337	57542640	-	1303						360			0	0.391976
XLOC_002108	chr2	60621991	60628362	-	6371	chr11	24112573	24117976	+	5403	2755	3312	0.09181	129	0.530611	0.00974
XLOC_002111	chr2	61367899	61372110	-	4211						3721			0	1.97444
XLOC_002113	chr2	61971121	61992046	-	20925	chr11	22968480	22992522	+	24042	2016	119	0.88852	0	0.75197	10.1065
XLOC_002116	chr2	62683441	62688910	-	5469	chr11	22514016	22518396	+	4380	747	658	0.06335	0	0.472201	0.79599
XLOC_002117	chr2	62801490	62889929	-	88439	chr11	22248664	22333907	+	85243	1936	880	0.375	102	2.9354	0.303395
XLOC_002120	chr2	64027395	64028724	-	1329						530			129	2.36369
XLOC_002123	chr2	64412214	64432619	-	20405	chr11	20932316	20952743	+	20427	3304	4443	0.14702	102	0.062797	0.022859
XLOC_002124	chr2	64503034	64503985	-	951	chr11	20855664	20856110	+	446	704	7	0.98031	0	0.408972	0
XLOC_002125	chr2	64530720	64568781	-	38061	chr11	20801495	20830841	+	29346	441			177	7.01126
XLOC_002130	chr2	65128973	65132271	-	3298	chr11	20314170	20329030	+	14860	2928	14860	0.67079	0	0.121118	0.036191
XLOC_002131	chr2	65196935	65197921	-	986						675			117	0.567413
XLOC_002132	chr2	65257860	65280151	-	22291	chr11	20152224	20182896	+	30672	1133	362	0.51572	0	6.69555	0.933544
XLOC_002133	chr2	65273703	65283317	-	9614						2513	475	0.68206	0	0.417977
XLOC_002136	chr2	65952595	65953735	-	1140	chr11	19565970	19566484	+	514	322	18	0.89412	0	0.243159	0
XLOC_002138	chr2	66653866	66660602	-	6736	chr11	18920615	18926807	+	6192	707	566	0.11076	0	0.526197	0.203609
XLOC_002140	chr2	66924256	66930359	-	6103	chr11	18645386	18651041	+	5655	765	741	0.01594	141	2.54889	0.432987
XLOC_002141	chr2	67148641	67149631	-	990	chr11	18397818	18398419	+	601	446	217	0.3454	0	0.468146	0
XLOC_002142	chr2	67350488	67442466	-	91978	chr11	18052082	18180646	+	128564	3201	3125	0.01201	0	0.252792	0.254855
XLOC_002145	chr2	68023185	68052694	-	29509	chr11	17388333	17398667	+	10334	725	227	0.52311	0	0.088581	0.364314
XLOC_002147	chr2	69059947	69064324	-	4377						1017			0	1.3088
XLOC_002151	chr2	70321028	70322418	-	1390	chr6	86466064	86468871	+	2807	910	1903	0.353	108	0.327354	3.83536
XLOC_002152	chr2	70351167	70369836	-	18669	chr6	86422422	86430995	+	8573	697	35	0.90437	0	1.89274	5.48774
XLOC_002158	chr2	73090669	73112750	-	22081						407			108	0.472788
XLOC_002161	chr2	73533089	73534993	-	1904						1064			0	2.99257
XLOC_002168	chr2	74634630	74635332	-	702						581			138	0.115419
XLOC_002172	chr2	77879538	77881794	-	2256	chr6	79839947	79841234	+	1287	284			0	0.331997
XLOC_002178	chr2	79146571	79158506	-	11935	chr6	78547138	78560379	+	13241	684	48	0.86885	0	0.629584	0.735059
XLOC_002182	chr2	81689818	81694070	-	4252						520	143	0.56863	0	1.45553
XLOC_002185	chr2	83094015	83095308	-	1293						1148			0	0.375118
XLOC_002186	chr2	84696980	84705149	-	8169						2068	211	0.81483	0	0.754111
XLOC_002192	chr2	86130445	86131926	-	1481	chr6	72032637	72032930	+	293	1052	293	0.56431	0	1.4925	0
XLOC_002194	chr2	86209698	86225242	-	15544	chr6	71940380	71959632	+	19252	1274	329	0.58952	108	0.297483	1.51699
XLOC_002196	chr2	88320096	88320452	-	356						262			0	0.39219
XLOC_002197	chr2	88436734	88438049	-	1315						282			117	6.39847
XLOC_002198	chr2	88986203	88991016	-	4813	chr6	70742343	70749772	+	7429	1782	1496	0.08725	0	0.585839	0.357445
XLOC_002204	chr2	92176818	92179491	-	2673						534			0	0.094183
XLOC_002209	chr2	96610861	96626412	-	15551	chr6	118499655	118502525	-	2870	473	181	0.44648	0	0.496204	0.212233
XLOC_002211	chr2	97193679	97198043	-	4364	chr1	36356505	36360526	-	4021	437	404	0.03924	0	0.237394	0.095085
XLOC_002214	chr2	97930722	97934697	-	3975						2001			0	0.064109
XLOC_002221	chr2	99378400	99388659	-	10259						2365	1456	0.2379	108	0.707325
XLOC_002223	chr2	101286353	101292500	-	6147	chr1	39113518	39122317	-	8799	562	612	0.04259	0	0.998454	0.057652
XLOC_002227	chr2	101802574	101807916	-	5342	chr1	39558399	39560667	-	2268	2260	475	0.65265	90	0.902523	0.449663
XLOC_002229	chr2	102168064	102184370	-	16306	chr1	39845349	39870334	-	24985	696	419	0.24843	0	0.374987	0.515191
XLOC_002236	chr2	104913937	104991859	-	77922	chr1	42183577	42267345	-	83768	689	89	0.77121	90	1.28791	10.7995
XLOC_002237	chr2	105028684	105030466	-	1782	chr1	42295073	42297035	-	1962	493	481	0.01232	93	5.39365	0
XLOC_002238	chr2	105104913	105136671	-	31758	chr1	42381421	42425714	-	44293	1459	1317	0.05115	93	2.88411	0.709895
XLOC_002239	chr2	105197278	105198348	-	1070	chr1	42492001	42493431	-	1430	437	69	0.72727	0	0.238893	5.41714
XLOC_002240	chr2	105363088	105374177	-	11089	chr1	42642762	42656785	-	14023	3758	3487	0.03741	0	0.312273	0.358586
XLOC_002241	chr2	105413577	105470027	-	56450	chr1	42693520	42752033	-	58513	1458	1389	0.02424	0	6.47358	3.23588
XLOC_002244	chr2	105810304	105813861	-	3557	chr1	43062665	43063552	-	887	1263	721	0.27319	183	0.165315	0.074769
XLOC_002245	chr2	105950390	105953445	-	3055	chr1	43152752	43155044	-	2292	2272	1593	0.17568	0	0.925987	0.0372
XLOC_002248	chr2	106575539	106578462	-	2923	chr1	43706962	43709912	-	2950	424	400	0.02913	0	0.369327	0.089123
XLOC_002250	chr2	107871146	107982329	-	111183	chr17	54999910	55117872	+	117962	1196	299	0.6	159	0.62245	2.57243
XLOC_002251	chr2	107998899	108001971	-	3072	chr17	54976431	54979950	+	3519	1639	377	0.62599	150	0.327314	0.584964
XLOC_002252	chr2	108002087	108159105	-	157018	chr17	54794097	54976317	+	182220	609	216	0.47636	102	9.15699	6.8664
XLOC_002253	chr2	108263407	108267421	-	4014						238			0	0.05483
XLOC_002254	chr2	108439519	108443285	-	3766						1913	2060	0.037	0	1.24834
XLOC_002255	chr2	108665655	108669211	-	3556	chr17	54362516	54363681	+	1165	388	239	0.23764	0	0.069431	0
XLOC_002258	chr2	108845323	108848661	-	3338						2698			0	0.36944
XLOC_002262	chr2	109684998	109686355	-	1357	chr10	58246191	58247707	-	1516	455	706	0.21619	108	0.315484	0
XLOC_002263	chr2	110969105	110980517	-	11412						2310	860	0.45741	414	2.67378
XLOC_002275	chr2	113399406	113403306	-	3900	chr2	129019603	129024330	-	4727	1566	1575	0.00287	135	0.866637	0.515875
XLOC_002277	chr2	113576773	113581878	-	5105						285	23	0.85065	0	0.661664
XLOC_002289	chr2	118515138	118561750	-	46612	chr1	123467428	123507225	+	39797	592	223	0.45276	0	0.286561	2.39451
XLOC_002293	chr2	120030213	120040231	-	10018	chr1	122105349	122108987	+	3638	954	278	0.5487	213	0.683989	1.79635
XLOC_002296	chr2	121300484	121301902	-	1418	chr1	121116331	121117102	+	771	528	115	0.6423	150	0.831963	0.280515
XLOC_002297	chr2	121311318	121315685	-	4367	chr1	121101559	121105925	+	4366	523	142	0.57293	0	0.027094	0.203109
XLOC_002301	chr2	123235689	123262687	-	26998						857	381	0.38449	0	3.59358
XLOC_002302	chr2	123561296	123567020	-	5724	chr1	100904292	100911140	-	6848	1490	139	0.82934	0	0.753196	0.222293
XLOC_002305	chr2	124597398	124671069	-	73671	chr1	117412865	117466843	-	53978	329			0	0.436307
XLOC_002307	chr2	126464386	126483468	-	19082						475			0	1.04397
XLOC_002308	chr2	126867675	126875562	-	7887						624			93	0.020913
XLOC_002309	chr2	128168765	128169824	-	1059	chrX	6679060	6680061	-	1001	780	583	0.14453	132	0.234223	0.046234
XLOC_002310	chr2	128193815	128228064	-	34249						445			0	4.60423
XLOC_002313	chr2	128456822	128458363	-	1541						252			0	0.35669
XLOC_002315	chr2	129821418	129829298	-	7880	chr1	35552753	35555928	+	3175	660			117	0.197721
XLOC_002317	chr2	130324222	130351825	-	27603						4164			0	1.1094
XLOC_002320	chr2	130680434	130691890	-	11456	chr14	26707890	26722445	-	14555	401	378	0.02953	261	3.5954	1.02675
XLOC_002322	chr2	131588550	131594567	-	6017	chr1	34731729	34735109	-	3380	2975	757	0.59432	0	0.157911	0.071213
XLOC_002323	chr2	132227280	132230483	-	3203	chr12	112559168	112559908	-	740	1069	249	0.62215	96	0.658413	0
XLOC_002326	chr2	132741509	132751734	-	10225	chr16	86499964	86503365	+	3401	840	448	0.30435	0	0.339284	0
XLOC_002329	chr2	133043367	133051950	-	8583						322			237	0.283686
XLOC_002331	chr2	134785345	134788845	-	3500	chr1	129031931	129037851	-	5920	1481	1381	0.03494	183	0.173649	0.020728
XLOC_002338	chr2	139667503	139674941	-	7438						972			0	0.174531
XLOC_002340	chr2	140861151	140889349	-	28198						444			0	0.146954
XLOC_002344	chr2	145281130	145282228	-	1098	chr2	44971956	44972987	-	1031	456	449	0.00773	0	1.57427	0.157162
XLOC_002352	chr2	150624019	150715705	-	91686	chr2	50349671	50428230	-	78559	2265	1854	0.09978	123	0.328399	0.692218
XLOC_002353	chr2	151008157	151022842	-	14685	chr2	50695243	50717544	-	22301	1436	750	0.31382	0	0.96365	0.381674
XLOC_002360	chr2	155328061	155345430	-	17369	chr2	54989598	55004423	-	14825	352	130	0.46058	0	2.86994	1.65872
XLOC_002368	chr2	160780449	160792478	-	12029	chr2	60246275	60253570	-	7295	4997	1316	0.58308	0	2.98772	0.205929
XLOC_002377	chr2	165509840	165522523	-	12683	chr2	64887059	64909573	-	22514	751			0	3.67873
XLOC_002383	chr2	169197716	169200862	-	3146						1152	173	0.73887	180	0.090622
XLOC_002384	chr2	169281144	169285565	-	4421	chr2	68659767	68661895	-	2128	1697	480	0.55903	0	0.315281	0.111245
XLOC_002390	chr2	172101202	172157685	-	56483	chr2	70733633	70782594	-	48961	603	123	0.66116	0	1.91705	11.8678
XLOC_002392	chr2	173188077	173190935	-	2858	chr2	71521042	71523013	-	1971	899	695	0.12798	357	0.537079	0.048625
XLOC_002399	chr2	175197324	175198448	-	1124	chr2	73107811	73108821	-	1010	628	591	0.03035	135	0.394811	0.096872
XLOC_002401	chr2	176748703	176749791	-	1088	chr2	74323355	74324599	-	1244	548	407	0.14764	0	0.220259	0
XLOC_002406	chr2	177370973	177372430	-	1457	chr2	74852715	74853152	-	437	494	184	0.45723	114	0.026416	0.183665
XLOC_002407	chr2	177389606	177396411	-	6805	chr2	74865476	74872746	-	7270	1116	1189	0.03167	0	0.050843	0.048514
XLOC_002408	chr2	177494321	177502659	-	8338	chr2	74967619	74975770	-	8151	1782	1439	0.10649	0	3.3466	0.122595
XLOC_002410	chr2	177695966	177708327	-	12361	chr2	75165494	75181123	-	15629	364	267	0.15372	108	0.573607	2.08306
XLOC_002411	chr2	177710720	177714156	-	3436	chr2	75186166	75189509	-	3343	646	635	0.00859	0	0.848423	0.047419
XLOC_002418	chr2	182286880	182290476	-	3596	chr2	79072491	79075251	-	2760	533	827	0.21618	102	0.146899	0.418707
XLOC_002419	chr2	182555106	182558142	-	3036	chr2	79316562	79320847	-	4285	985	751	0.13479	153	0.039745	0.237345
XLOC_002420	chr2	183536803	183539242	-	2439	chr2	80123441	80123776	-	335	826	217	0.58389	0	0.189582	0
XLOC_002424	chr2	186001934	186031910	-	29976	chr2	82294992	82315943	-	20951	718	941	0.13442	0	0.272623	0.143653
XLOC_002427	chr2	186815193	186817647	-	2454						458			0	0.256228
XLOC_002433	chr2	190202502	190305828	-	103326	chr1	45728416	45852003	-	123587	415	337	0.10372	0	3.06025	8.23941
XLOC_002440	chr2	192559714	192563971	-	4257	chr1	51517860	51519434	+	1574	3922	1572	0.42774	0	1.97119	0.035072
XLOC_002449	chr2	199164086	199239821	-	75735	chr1	55932355	56017826	-	85471	2966	458	0.73248	165	0.130002	2.95147
XLOC_002452	chr2	200527509	200715899	-	188390	chr1	57199720	57386501	-	186781	2925	2498	0.07874	0	4.93482	0.471306
XLOC_002455	chr2	200835632	200875929	-	40297	chr1	57479213	57522565	-	43352	1651	476	0.55242	0	1.86838	0.518865
XLOC_002461	chr2	201979496	201980387	-	891						791			0	0.663537
XLOC_002473	chr2	208041220	208124809	-	83589	chr1	64179639	64274517	-	94878	14271	12000	0.08645	135	0.256949	3.27763
XLOC_002476	chr2	214020529	214032436	-	11907	chr1	69737550	69755598	-	18048	1100	1051	0.02278	0	0.154222	0.603724
XLOC_002478	chr2	214131487	214148967	-	17480	chr1	69858473	69873406	-	14933	2532	291	0.79384	0	0.298924	1.04704
XLOC_002485	chr2	217719104	217719914	-	810						649			0	0.824394
XLOC_002486	chr2	217726273	217730405	-	4132	chr1	73064020	73067778	-	3758	878	679	0.12781	132	0.356708	0.13625
XLOC_002487	chr2	217731055	217732536	-	1481	chr1	73069066	73069556	-	490	429	180	0.40887	0	0.730045	0.183002
XLOC_002488	chr2	217927046	217931700	-	4654	chr1	73232789	73237850	-	5061	2188	2215	0.00613	0	0.357055	0.034686
XLOC_002498	chr2	221670538	221718382	-	47844	chr1	76787514	76839538	-	52024	6380	5320	0.0906	0	0.378376	0.047727
XLOC_002499	chr2	221747473	221802061	-	54588	chr1	76872100	76916716	-	44616	343	329	0.02083	0	2.4927	3.40835
XLOC_002514	chr2	231450742	231451708	-	966	chr1	87622891	87623362	-	471	652	242	0.45861	0	0.32635	0
XLOC_002515	chr2	231554953	231565244	-	10291	chr1	87671513	87682988	-	11475	2702	3108	0.06988	0	0.120455	0.363272
XLOC_002517	chr2	231849083	231860752	-	11669	chr1	87902645	87918433	-	15788	3874	2121	0.29241	0	1.18234	0.201693
XLOC_002523	chr2	235742958	235822028	-	79070	chr1	90879252	90934096	-	54844	1389	1127	0.10413	150	0.252411	0.281762
XLOC_002530	chr2	238199649	238203343	-	3694	chr1	92639784	92642370	-	2586	805	1187	0.19177	102	0.430504	0.128344
XLOC_002538	chr2	239697288	239698357	-	1069	chr1	93654891	93655977	-	1086	592	597	0.00421	0	0	0.935672
XLOC_002539	chr2	239840997	239847965	-	6968						3489			150	0.086025
XLOC_002542	chr2	241166976	241195452	-	28476	chr1	94588648	94613309	-	24661	647	465	0.16367	0	1.0251	0.873659
XLOC_002543	chr2	241320859	241327143	-	6284						3141			0	0.547279
XLOC_002548	chr2	241894037	241906868	-	12831	chr1	95101990	95113655	-	11665	2270	1066	0.36091	252	0.446681	2.87956
XLOC_002552	chr2	242483815	242492258	-	8443	chr1	95566759	95576254	-	9495	1139	298	0.58525	0	0.861878	2.57813
XLOC_002554	chr2	242671428	242673870	-	2442						1867			135	0.205144
XLOC_002558	chr2	242835751	242844846	-	9095						2101			162	1.07588
XLOC_002560	chr2	242989845	243026749	-	36904						2765			132	0.926424
XLOC_002561	chr2	243173848	243176661	-	2813						1998			120	0.085197
XLOC_002562	chr3	62253	66367	+	4114	chr6	103238211	103241890	+	3679	804	20	0.95146	0	0.762847	10.8146
XLOC_002563	chr3	95887	111980	+	16093	chr6	103269114	103290641	+	21527	1413	631	0.38258	0	0.175472	0.451971
XLOC_002565	chr3	898806	899774	+	968						497			0	0.311517
XLOC_002571	chr3	8121008	8154611	+	33603	chr6	111830448	111863807	+	33359	566	240	0.40447	0	0.592389	0.432839
XLOC_002573	chr3	9291437	9299191	+	7754	chr6	112897367	112905991	+	8624	744	349	0.36139	126	0.666961	0.265082
XLOC_002577	chr3	12512284	12518022	+	5738	chr6	115477907	115485056	+	7149	962	542	0.27926	219	0.250409	0.500004
XLOC_002581	chr3	14266505	14272302	+	5797						1475	388	0.58347	150	2.05556
XLOC_002587	chr3	16566328	16573120	+	6792	chr17	50347932	50355905	+	7973	767	436	0.27515	0	0.40833	1.37875
XLOC_002588	chr3	16577810	16582885	+	5075	chr17	50357312	50358893	+	1581	1529	1025	0.19734	0	1.11805	0.030439
XLOC_002590	chr3	17784427	17787157	+	2730	chr17	51318915	51319664	+	749	481	153	0.51735	0	1.27511	0.226321
XLOC_002593	chr3	18735378	18959184	+	223806	chr17	52270689	52561487	+	290798	1220	403	0.50339	0	1.26967	6.44425
XLOC_002595	chr3	20383959	20392420	+	8461						2283			0	0.034296
XLOC_002597	chr3	23635940	23643659	+	7719	chr14	19386564	19402653	-	16089	436	136	0.52448	102	1.33394	5.60144
XLOC_002601	chr3	25913583	26020527	+	106944	chr14	16836593	17008956	-	172363	1027	308	0.53858	0	0.876747	17.5657
XLOC_002602	chr3	27753780	27755870	+	2090	chr9	118396742	118398858	-	2116	1315	1258	0.02215	0	0.980504	0.282568
XLOC_002603	chr3	27844252	27932792	+	88540	chr9	118292843	118354142	-	61299	935	421	0.37906	105	0.572227	1.24769
XLOC_002606	chr3	30392213	30433637	+	41424	chr9	116214053	116235950	-	21897	690	386	0.28253	258	1.01071	1.20073
XLOC_002612	chr3	34200825	34604551	+	403726	chr9	112978148	113310839	-	332691	2262	1272	0.28014	0	1.10189	5.07743
XLOC_002615	chr3	38864385	38866793	+	2408	chr9	119634173	119640876	+	6703	1747	1600	0.04392	0	0.283848	0.042243
XLOC_002616	chr3	39219383	39223013	+	3630	chr9	119911301	119920853	+	9552	418	267	0.22044	0	1.34242	0.86324
XLOC_002618	chr3	39280588	39300798	+	20210						834			0	2.6267
XLOC_002619	chr3	39418963	39422626	+	3663						414			150	0.378248
XLOC_002620	chr3	39462166	39465596	+	3430						343			192	0.977529
XLOC_002622	chr3	40807697	40904117	+	96420						500			0	1.38325
XLOC_002624	chr3	42055123	42075359	+	20236	chr9	121206634	121229135	+	22501	516	317	0.2389	0	4.97586	12.2392
XLOC_002629	chr3	44040885	44059829	+	18944	chr9	122481681	122501041	+	19360	1368	3655	0.45531	0	2.69126	0.390142
XLOC_002630	chr3	44465601	44470995	+	5394	chr17	84897229	84897919	-	690	1025	138	0.76268	204	2.78815	0
XLOC_002636	chr3	47205719	47217364	+	11645	chr9	110431279	110434850	-	3571	1013	271	0.57788	108	1.64891	7.00005
XLOC_002639	chr3	47575528	47580118	+	4590	chr9	110189286	110190616	-	1330	1845	428	0.62341	129	0.084875	0
XLOC_002643	chr3	48885369	48893739	+	8370	chr9	108587516	108594410	-	6894	3586	2712	0.13877	0	0.329436	0.345137
XLOC_002647	chr3	50300397	50304841	+	4444	chr9	107509251	107512847	-	3596	416	536	0.12605	0	2.57917	8.2941
XLOC_002650	chr3	50706848	50709456	+	2608	chr9	107137293	107139507	-	2214	2414	2033	0.08568	0	0.370206	0.105061
XLOC_002652	chr3	52273279	52275113	+	1834	chr9	106104776	106105353	-	577	1095	143	0.76898	0	0.182913	0.249295
XLOC_002653	chr3	52279001	52279536	+	535	chr9	106101777	106102212	-	435	383	335	0.06685	0	0.494769	0.159395
XLOC_002664	chr3	55330227	55334766	+	4539	chr14	29516382	29522193	-	5811	1602	1975	0.10428	90	0.065166	0.078225
XLOC_002675	chr3	58419600	58470480	+	50880	chr14	9005543	9039179	+	33636	1108	1265	0.06616	96	1.07542	0.328478
XLOC_002680	chr3	61284243	61299032	+	14789						419	457	0.04338	93	0.560601
XLOC_002682	chr3	63132058	63134472	+	2414	chr14	13978141	13979780	+	1639	300	106	0.47783	0	2.10111	0.332857
XLOC_002685	chr3	64430906	64441739	+	10833	chr6	92655997	92669892	+	13895	1796	2329	0.12921	0	1.39505	0.24932
XLOC_002688	chr3	65160632	65179179	+	18547	chr6	93404982	93424779	+	19797	684	560	0.09968	102	0.362488	2.69416
XLOC_002690	chr3	66024756	66027673	+	2917	chr6	94234074	94238999	+	4925	1714	2340	0.15442	0	0.228405	0.013334
XLOC_002693	chr3	67891018	67939460	+	48442	chr6	95861018	95940030	+	79012	392	121	0.52827	0	1.72646	37.9837
XLOC_002695	chr3	69640491	69642272	+	1781	chr6	97632464	97633336	+	872	749	66	0.83804	0	0	0
XLOC_002696	chr3	70048727	70064449	+	15722	chr6	97998643	98011463	+	12820	2068	1146	0.28687	207	0.170376	0.046595
XLOC_002697	chr3	70216956	70221713	+	4757	chr6	98158322	98163038	+	4716	995	943	0.02683	138	0.275418	0.056625
XLOC_002698	chr3	70666964	70669429	+	2465	chr6	98543250	98546455	+	3205	959	1382	0.18069	105	0.816448	0.021788
XLOC_002701	chr3	71834485	71837924	+	3439	chr6	99676531	99680112	+	3581	1144	1050	0.04284	0	0.196963	0.033603
XLOC_002705	chr3	73857751	73952017	+	94266	chr6	101533489	101644755	+	111266	782	653	0.0899	204	0.414566	16.7658
XLOC_002708	chr3	74955610	74956762	+	1152	chr6	102923012	102925317	+	2305	303	108	0.47445	0	0	0.940397
XLOC_002712	chr3	75606116	75608433	+	2317						476			0	0.619855
XLOC_002713	chr3	78101913	78114598	+	12685	chr16	73474765	73485103	-	10338	517	194	0.45429	0	0.075723	0.535471
XLOC_002716	chr3	80813984	80838518	+	24534	chr16	71196635	71211020	-	14385	1221	229	0.68414	144	0.876383	0.233177
XLOC_002717	chr3	81042999	81146631	+	103632	chr16	71000313	71073666	-	73353	3244	5082	0.22075	258	2.98601	0.614084
XLOC_002719	chr3	81889697	81972012	+	82315	chr16	70102351	70200604	-	98253	735	657	0.05603	0	0.553327	136.993
XLOC_002721	chr3	83433606	83486868	+	53262	chr16	68844324	68869931	-	25607	692	41	0.88813	0	1.84806	17.34
XLOC_002722	chr3	84002800	84103276	+	100476	chr16	68351380	68405513	-	54133	7110	153	0.95787	0	0.890316	2.94217
XLOC_002725	chr3	86708205	86771837	+	63632	chr16	66074965	66113075	-	38110	1509	702	0.36499	135	0.821543	0.197305
XLOC_002726	chr3	87138429	87206685	+	68256	chr16	65637803	65695462	-	57659	5105	2457	0.35017	0	0.326676	1.66928
XLOC_002727	chr3	88387572	88517304	+	129732	chr16	64476899	64602195	-	125296	3690	3687	0.00041	171	1.14582	0.444769
XLOC_002730	chr3	96336028	96337039	+	1011	chrM	1139	2155	-	1016	872	878	0.00343	0	6.0686	0
XLOC_002732	chr3	97796998	97801489	+	4491						340			0	0.38381
XLOC_002733	chr3	97910048	97915894	+	5846						1126	177	0.72832	0	0.014889
XLOC_002735	chr3	98621202	98623886	+	2684	chr16	58405883	58408006	-	2123	309	303	0.0098	0	0.325527	0.114281
XLOC_002736	chr3	98699901	98701940	+	2039	chr16	58316896	58319194	-	2298	962	935	0.01423	0	0.070351	0.041085
XLOC_002741	chr3	101659702	101716770	+	57068	chr16	55711030	55749089	-	38059	2324	1578	0.19118	0	0.247776	1.35548
XLOC_002742	chr3	102444624	102446410	+	1786	chr16	54922288	54927610	-	5322	450	1048	0.3992	123	0.782973	0.029425
XLOC_002743	chr3	102636250	102871281	+	235031	chr16	54508226	54723064	-	214838	736	216	0.54622	159	2.66454	4.46689
XLOC_002745	chr3	104731559	104736840	+	5281	chr16	52796859	52801230	-	4371	498	157	0.52061	0	0.077723	0.188426
XLOC_002746	chr3	106959538	107045810	+	86272	chr16	50635420	50732850	-	97430	9656	10525	0.04306	0	1.74436	0.351595
XLOC_002749	chr3	107853893	107857879	+	3986	chr16	49786720	49790224	-	3504	3023	2422	0.11038	0	2.92765	0.063662
XLOC_002754	chr3	108897011	108904107	+	7096	chr16	48377209	48386746	-	9537	2523	2269	0.05301	207	0.170839	1.14683
XLOC_002760	chr3	112876554	112902095	+	25541	chr16	44599397	44626201	-	26804	1605	1906	0.08573	0	0.439051	0.248227
XLOC_002769	chr3	116638698	116651245	+	12547	chr16	41051764	41069153	-	17389	1783	1778	0.0014	0	0.578191	2.04658
XLOC_002770	chr3	116958057	116963238	+	5181	chr16	40757899	40763550	-	5651	959	785	0.09977	0	0.087407	1.30479
XLOC_002773	chr3	117438743	117447915	+	9172	chr16	40262492	40271813	-	9321	483	465	0.01899	0	0.999656	13.1543
XLOC_002774	chr3	117509519	117512612	+	3093	chr16	40188392	40192882	-	4490	510	375	0.15254	0	0.153524	2.65948
XLOC_002775	chr3	118207644	118215620	+	7976	chr16	39428841	39446141	-	17300	959	2291	0.40985	105	0.489869	0.015401
XLOC_002779	chr3	119813741	119855628	+	41887	chr16	38040607	38089155	-	48548	4092	1761	0.39826	174	0.589212	7.7221
XLOC_002780	chr3	120005000	120008319	+	3319	chr16	37914644	37915591	-	947	2195	947	0.3972	0	0.154573	0.032564
XLOC_002788	chr3	122998229	122999473	+	1244	chr16	35307195	35308266	-	1071	740	373	0.32974	0	0.368	0.189184
XLOC_002791	chr3	124780921	124782903	+	1982	chr16	33675756	33677554	-	1798	1481	1379	0.03566	90	0.374716	0.051703
XLOC_002793	chr3	125485333	125505694	+	20361	chr16	5306913	5316873	+	9960	355	324	0.04566	0	2.2043	36.6395
XLOC_002796	chr3	125934370	125966235	+	31865						532			0	1.83794
XLOC_002797	chr3	125985638	126010400	+	24762	chr6	90444924	90458957	-	14033	1311	320	0.6076	123	2.56857	3.12511
XLOC_002798	chr3	126011602	126013479	+	1877	chr6	90442137	90442652	-	515	682	515	0.13952	0	0.589957	0.121167
XLOC_002802	chr3	127208395	127209630	+	1235	chr6	88908820	88909409	-	589	697	286	0.41811	180	0.037445	0.310803
XLOC_002803	chr3	127256955	127259967	+	3012	chr6	88882648	88883508	-	860	1484	551	0.45848	258	0.035174	0.761106
XLOC_002808	chr3	128191834	128193950	+	2116	chr6	88160795	88166153	-	5358	703	73	0.81186	171	0.241315	5.85178
XLOC_002811	chr3	128774333	128777479	+	3146						1019			198	0.179287
XLOC_002813	chr3	128949392	128955149	+	5757						1150			0	0.391871
XLOC_002821	chr3	129869289	129872415	+	3126						287			0	0.994034
XLOC_002825	chr3	130236018	130279028	+	43010	chr9	105691468	105730393	-	38925	284	213	0.14286	0	0.505441	1.15953
XLOC_002840	chr3	141468728	141493540	+	24812	chr9	96352894	96368689	-	15795	573	198	0.48638	0	3.85073	0.809053
XLOC_002841	chr3	141570620	141580150	+	9530	chr9	96281914	96297033	-	15119	731	698	0.02309	138	0.058216	1.70608
XLOC_002845	chr3	142645516	142661376	+	15860	chr9	95480885	95504638	-	23753	3147	2256	0.16491	0	1.82355	2.60462
XLOC_002847	chr3	142802858	142803787	+	929						434			0	0.41831
XLOC_002857	chr3	147225697	147228122	+	2425	chr9	91143537	91147869	-	4332	883	2927	0.53648	0	0.227832	0.017349
XLOC_002859	chr3	147657791	147724874	+	67083	chr9	90649184	90723694	-	74510	3169	2645	0.09013	96	0.761788	0.500907
XLOC_002863	chr3	148658604	148673471	+	14867						219	78	0.47475	150	0.59587
XLOC_002865	chr3	148942374	148944127	+	1753	chr3	19853146	19854809	-	1663	826	524	0.2237	0	1.65888	0
XLOC_002866	chr3	149002729	149005632	+	2903						434			0	1.34037
XLOC_002867	chr3	149095952	149104368	+	8416	chr3	57099296	57108036	+	8740	541	468	0.07235	0	0.405423	9.04688
XLOC_002870	chr3	149756946	149758445	+	1499	chr3	57727234	57728903	+	1669	214	111	0.31692	0	0.243917	0.304453
XLOC_002871	chr3	149956305	149957996	+	1691	chr3	57976852	57978703	+	1851	609	277	0.37472	0	0.428557	0.183327
XLOC_002872	chr3	150180866	150184187	+	3321	chr3	58267957	58270683	+	2726	3188	2564	0.10848	90	2.68718	0.033493
XLOC_002874	chr3	150608646	150610167	+	1521	chr3	58614252	58614524	+	272	346	11	0.93838	231	0.188577	8.08087
XLOC_002878	chr3	152368257	152457738	+	89481	chr3	60628273	60716325	+	88052	3467	3203	0.03958	114	3.15273	65.2986
XLOC_002880	chr3	153069867	153091975	+	22108	chr3	61352276	61380937	+	28661	758			144	4.99535
XLOC_002881	chr3	153094619	153095351	+	732						382			0	1.77638
XLOC_002882	chr3	153101577	153108386	+	6809	chr3	61384465	61392876	+	8411	6581	4506	0.18716	0	0.521075	0.071102
XLOC_002884	chr3	153480917	153482081	+	1164						571			0	1.03154
XLOC_002886	chr3	154958731	154976547	+	17816	chr3	63245172	63261821	+	16649	1499	1369	0.04533	0	0.766085	0.120308
XLOC_002887	chr3	155008976	155011965	+	2989	chr3	63285449	63291600	+	6151	444	3760	0.78877	0	1.5328	0.096368
XLOC_002888	chr3	155572512	155581520	+	9008						1520	108	0.86732	165	0.480773
XLOC_002891	chr3	156799629	156806336	+	6707	chr3	65667366	65674744	+	7378	1497	1420	0.0264	132	0.862997	0.080635
XLOC_002892	chr3	156807551	156818926	+	11375	chr3	65675881	65689515	+	13634	1413	1005	0.16873	0	4.50841	1.82611
XLOC_002897	chr3	158586272	158602973	+	16701	chr3	67451450	67469983	+	18533	1524	664	0.39305	195	0.707949	0.178493
XLOC_002900	chr3	164169032	164405798	+	236766	chr3	72279136	72454336	+	175200	3139	316	0.81708	99	3.49706	4.862
XLOC_002903	chr3	166255714	166261364	+	5650						827			0	0.662734
XLOC_002907	chr3	167582636	167584402	+	1766	chr3	75500993	75502988	+	1995	560	510	0.04673	0	0.225385	0
XLOC_002908	chr3	167584422	167601170	+	16748	chr3	75503008	75526312	+	23304	1158	1021	0.06287	0	2.09624	0.052299
XLOC_002909	chr3	167613735	167641795	+	28060	chr3	75551987	75601238	+	49251	3265	9963	0.50635	0	0.61614	0.010194
XLOC_002912	chr3	168619732	168639784	+	20052	chr3	29664639	29693675	+	29036	745	848	0.06466	150	0.564724	0.630588
XLOC_002913	chr3	168720861	168723254	+	2393	chr3	29747330	29749337	+	2007	429	405	0.02878	0	0.304185	0
XLOC_002916	chr3	169683928	169684501	+	573	chr3	30691727	30692156	+	429	347	242	0.17827	0	1.31624	0.328303
XLOC_002919	chr3	170128299	170136403	+	8104	chr3	31037968	31048618	+	10650	664	419	0.22622	0	0.196529	0.958673
XLOC_002921	chr3	171185872	171187422	+	1550	chr3	28148412	28151517	-	3105	229	225	0.00881	0	0.710634	0.300394
XLOC_002924	chr3	172871526	173054755	+	183229	chr3	26311889	26530094	-	218205	470	224	0.35447	108	0.527535	4.1738
XLOC_002925	chr3	174156362	174455769	+	299407	chr3	24792718	25045126	-	252408	1838	1489	0.1049	93	3.55019	0.767801
XLOC_002926	chr3	176262493	176283222	+	20729	chr3	22793496	22829964	-	36468	979	368	0.4536	90	0.399884	0.313495
XLOC_002927	chr3	176411540	176431515	+	19975	chr3	22582111	22613069	-	30958	273	233	0.07905	0	0.286803	1.16032
XLOC_002931	chr3	177159730	177261010	+	101280	chr3	21633735	21753873	-	120138	291			0	1.72139
XLOC_002932	chr3	177483364	177484684	+	1320	chr3	21329854	21331505	-	1651	394	348	0.06199	114	1.23878	0
XLOC_002934	chr3	177534652	177617012	+	82360	chr3	21208623	21273787	-	65164	3005	77	0.95003	219	0.108104	86.5767
XLOC_002937	chr3	180131961	180220736	+	88775	chr3	33459268	33557258	+	97990	1046	868	0.093	0	1.26004	0.86125
XLOC_002938	chr3	180585946	180589258	+	3312	chr3	33888131	33889156	+	1025	1616	1025	0.22378	294	0.654093	0.187386
XLOC_002942	chr3	182082934	182086044	+	3110	chr3	35124375	35127825	+	3450	328	389	0.08508	0	0.477423	0
XLOC_002945	chr3	182699181	182704748	+	5567	chr3	35832176	35837005	+	4829	496	43	0.84045	0	1.18393	4.72386
XLOC_002948	chr3	184096017	184097565	+	1548	chr16	20730730	20732734	+	2004	1434	1928	0.14694	0	1.86376	1.72124
XLOC_002949	chr3	184119379	184168918	+	49539	chr16	20754536	20831219	+	76683	935	474	0.32718	411	0.439044	526.2
XLOC_002951	chr3	184429981	184433265	+	3284	chr16	21333563	21338582	+	5019	672	234	0.48344	0	0.498947	0.150781
XLOC_002952	chr3	184433379	184477461	+	44082	chr16	21338639	21376923	+	38284	2401	1634	0.19009	132	1.02049	0.741706
XLOC_002953	chr3	184491163	184494210	+	3047	chr16	21388516	21391077	+	2561	578	424	0.15369	0	0.234178	0
XLOC_002954	chr3	184880658	184898371	+	17713	chr16	21704564	21728122	+	23558	570	70	0.78125	171	0.159251	15.6253
XLOC_002958	chr3	186156943	186175019	+	18076	chr16	22724701	22734606	+	9905	3137	1404	0.38163	0	0.432628	0.05026
XLOC_002960	chr3	186210911	186212820	+	1909	chr16	22768298	22769731	+	1433	1109	1035	0.03451	0	0.470678	0
XLOC_002962	chr3	187166632	187167238	+	606						246			105	0.165447
XLOC_002966	chr3	187824883	187864808	+	39925	chr16	24353715	24388679	+	34964	696	340	0.34363	0	0.166836	16.9062
XLOC_002967	chr3	189846777	189847483	+	706	chr16	26119277	26119651	+	374	497	186	0.45534	0	0.135509	0
XLOC_002968	chr3	191274951	191309646	+	34695	chr16	27582486	27641078	+	58592	2951	1420	0.35026	0	1.15324	0.552312
XLOC_002969	chr3	191470956	191477492	+	6536	chr16	27806157	27812653	+	6496	358	409	0.06649	0	1.02064	0.169326
XLOC_002970	chr3	191747668	191754346	+	6678	chr16	28051100	28063631	+	12531	903	589	0.21046	0	0	1.29325
XLOC_002975	chr3	193788001	193826963	+	38962	chr16	30008195	30042595	+	34400	1528	1380	0.05089	105	0.427014	14.7779
XLOC_002976	chr3	193918478	193921896	+	3418	chr16	30115509	30120766	+	5257	2503	4336	0.26802	0	1.18969	0.136453
XLOC_002977	chr3	193965436	193976672	+	11236	chr16	30170460	30181653	+	11193	2306	907	0.43542	252	1.24136	0.305998
XLOC_002981	chr3	194426276	194427693	+	1417	chr16	30617796	30618365	+	569	556	450	0.10537	132	0	0
XLOC_002996	chr3	195367105	195377621	+	10516						6933	158	0.95544	102	0.792422
XLOC_002997	chr3	195435001	195438746	+	3745	chr16	32804842	32806944	-	2102	2252	1631	0.15993	369	3.43493	0.032739
XLOC_003002	chr3	195869506	195887761	+	18255	chr16	32537939	32543491	-	5552	2238	815	0.4661	237	0.342884	0.131037
XLOC_003007	chr3	196417083	196420127	+	3044						273	121	0.38579	0	1.23805
XLOC_003017	chr3	2139210	2139848	-	638	chr6	105626515	105627141	-	626	450	443	0.00784	0	0.691812	0
XLOC_003021	chr3	4521578	4534847	-	13269	chr6	108155139	108162895	-	7756	879	790	0.05333	0	2.16844	0.044662
XLOC_003027	chr3	5732229	5741025	-	8796						3620	465	0.77234	0	0.759031
XLOC_003031	chr3	7925433	7925857	-	424						287			0	0
XLOC_003038	chr3	9640111	9641370	-	1259						834			0	0.093882
XLOC_003044	chr3	10766606	10780748	-	14142	chr6	114013014	114015708	-	2694	1397			171	0.233528
XLOC_003045	chr3	10801168	10805877	-	4709	chr6	114040103	114044292	-	4189	2960	2603	0.06417	0	0.079355	0.013695
XLOC_003052	chr3	13691791	13695339	-	3548	chr6	91231371	91234145	-	2774	632	154	0.60814	0	0.516201	0.960486
XLOC_003057	chr3	14689700	14690939	-	1239	chr6	91823134	91826556	-	3422	446	467	0.023	0	0.32185	0.074148
XLOC_003062	chr3	16569682	16581074	-	11392						311			0	1.00704
XLOC_003063	chr3	19045196	19053734	-	8538	chr17	52620671	52633595	-	12924	351	272	0.12681	153	0.483317	0.56009
XLOC_003065	chr3	23236300	23244446	-	8146	chr14	19726370	19733531	+	7161	1022	306	0.53916	0	1.2641	0.230607
XLOC_003068	chr3	24141464	24144738	-	3274						2241			0	0.256216
XLOC_003069	chr3	25899292	25915488	-	16196						2733	32	0.97685	93	0.396309
XLOC_003070	chr3	26660820	26664181	-	3361	chr14	16271605	16273471	+	1866	454	430	0.02715	0	0.089441	0
XLOC_003071	chr3	27872378	27875627	-	3249	chr9	118330231	118331883	+	1652	2833	1652	0.26332	0	0.069094	0.017459
XLOC_003073	chr3	28179940	28182228	-	2288	chr9	118113153	118115321	+	2168	316	191	0.24655	126	0.412961	0
XLOC_003075	chr3	30553386	30567941	-	14555	chr9	116137572	116149458	+	11886	877			213	0.386874
XLOC_003077	chr3	33002604	33016096	-	13492						575	132	0.62659	0	1.28549
XLOC_003079	chr3	33839481	33840004	-	523						369	34	0.83127	0	0.806992
XLOC_003093	chr3	40644615	40646918	-	2303						717			0	0.537273
XLOC_003094	chr3	40758900	40762498	-	3598						436			0	0
XLOC_003095	chr3	41012031	41013069	-	1038	chr9	120684539	120685698	-	1159	670	872	0.131	0	0.019477	0
XLOC_003096	chr3	41203777	41210038	-	6261	chr9	120805430	120809456	-	4026	610	1473	0.41431	171	0.021393	0.041871
XLOC_003100	chr3	42716783	42724788	-	8005						6440	262	0.92181	144	0.43717
XLOC_003102	chr3	43392791	43394060	-	1269	chr9	122078942	122079163	-	221	1053	117	0.8	0	1.47823	2.02597
XLOC_003104	chr3	44462618	44465499	-	2881	chr9	122746764	122753136	-	6372	768	624	0.10345	0	3.99303	1.82853
XLOC_003111	chr3	46876674	46888307	-	11633	chr9	110683441	110698743	+	15302	1171	16	0.97304	0	9.48298	156.784
XLOC_003120	chr3	49838878	49839621	-	743	chr9	107889215	107889692	+	477	409	166	0.42261	336	0.127624	0
XLOC_003123	chr3	50304072	50304947	-	875	chr9	107509145	107510058	+	913	385	502	0.13191	0	0.740256	0.835398
XLOC_003135	chr3	55394470	55395857	-	1387	chr14	29443385	29448579	+	5194	384	352	0.04348	0	0	0.085544
XLOC_003145	chr3	64064036	64073039	-	9003	chr6	92314961	92317500	-	2539	2129	490	0.62581	0	0.183883	0
XLOC_003146	chr3	64438806	64448067	-	9261	chr6	92666284	92677238	-	10954	1874	1830	0.01188	0	1.30913	0.050654
XLOC_003147	chr3	64474646	64475112	-	466						228			0	0.057235
XLOC_003148	chr3	64875576	64878710	-	3134	chr6	93104339	93107601	-	3262	574	536	0.03423	105	0.454688	2.10644
XLOC_003149	chr3	64928164	64973762	-	45598	chr6	93170976	93216730	-	45754	528	288	0.29412	0	23.47	110.555
XLOC_003151	chr3	65151133	65160500	-	9367	chr6	93387687	93404384	-	16697	563	498	0.06126	90	0.370858	0.071585
XLOC_003153	chr3	67291604	67292386	-	782	chr6	95285867	95286134	-	267	553	191	0.48656	0	0.325084	0
XLOC_003156	chr3	70654584	70666843	-	12259	chr6	98535776	98543026	-	7250	978	625	0.22021	108	0.880645	0.085436
XLOC_003157	chr3	71834485	71835757	-	1272	chr6	99676531	99677702	-	1171	1160	1089	0.03157	123	0.123746	0.031032
XLOC_003160	chr3	72553956	72599703	-	45747	chr6	100296744	100344316	-	47572	866	802	0.03837	222	0.12055	1.33161
XLOC_003162	chr3	72712457	72713404	-	947	chr6	100455740	100457143	-	1403	585	463	0.11641	0	1.9407	0
XLOC_003164	chr3	75691157	75695597	-	4440						444			0	0.32127
XLOC_003165	chr3	78071948	78079091	-	7143	chr16	73512702	73522706	+	10004	292	956	0.53205	165	0.759734	0.144883
XLOC_003166	chr3	78087855	78095945	-	8090	chr16	73491040	73498811	+	7771	409	400	0.01112	0	0	0
XLOC_003167	chr3	80810190	80838114	-	27924	chr16	71196635	71212995	+	16360	1273			0	0.871337
XLOC_003168	chr3	81257343	81258065	-	722						553	39	0.86824	0	0.755128
XLOC_003169	chr3	81295729	81346496	-	50767	chr16	70771726	70835650	+	63924	1261	660	0.31286	114	0.133456	0.566337
XLOC_003171	chr3	82025721	82026638	-	917						730			273	1.30496
XLOC_003175	chr3	86254390	86271969	-	17579	chr16	66528444	66554746	+	26302	809	7169	0.79719	147	0.274218	0.028284
XLOC_003176	chr3	86313704	86316546	-	2842						740			0	1.92216
XLOC_003177	chr3	86954826	86959897	-	5071	chr16	65904805	65907157	+	2352	912	262	0.55366	120	0.915758	0.338736
XLOC_003181	chr3	96335998	96337060	-	1062	chrM	1112	2155	+	1043	1044	1025	0.00918	0	2.41137	0
XLOC_003187	chr3	97949909	97956219	-	6310	chr16	59028522	59029320	+	798	792	176	0.63636	96	1.40052	0
XLOC_003194	chr3	102379500	102392850	-	13350						2211	2004	0.04911	0	0.177063
XLOC_003198	chr3	106018136	106019880	-	1744	chr16	51586375	51587930	+	1555	507	428	0.08449	0	0.051478	0.082437
XLOC_003199	chr3	106086837	106146799	-	59962	chr16	51494925	51545595	+	50670	1491	1110	0.14648	0	1.98675	0.505953
XLOC_003200	chr3	106403339	106436193	-	32854	chr16	51170439	51222909	-	52470	1745	1608	0.04086	0	1.23933	1.30666
XLOC_003201	chr3	106469674	106489988	-	20314	chr16	51084901	51107953	+	23052	215	129	0.25	111	2.57317	10.7623
XLOC_003202	chr3	106527860	106562176	-	34316	chr16	51011925	51053762	+	41837	4301	4095	0.02454	165	0.666531	0.635505
XLOC_003203	chr3	106631984	106646828	-	14844	chr16	50962944	50970546	+	7602	567	77	0.76087	0	0.591345	0.693474
XLOC_003204	chr3	106827307	106959488	-	132181	chr16	50732918	50808092	+	75174	2768	2264	0.10016	0	3.06463	0.06729
XLOC_003208	chr3	107560507	107597182	-	36675	chr16	50103619	50154442	+	50823	2634	3640	0.16034	0	2.95275	1.41743
XLOC_003209	chr3	107732833	107758725	-	25892	chr16	49918474	49945940	+	27466	4526	5421	0.08998	120	1.23487	0.178852
XLOC_003210	chr3	108447295	108447928	-	633	chr16	48889469	48890130	+	661	446	612	0.1569	0	0.351109	0.264257
XLOC_003211	chr3	108462079	108464336	-	2257	chr16	60848327	60849074	-	747	440	157	0.47404	0	1.98501	0
XLOC_003217	chr3	112362184	112368458	-	6274	chr16	45077809	45090104	+	12295	416	418	0.0024	99	0.123349	0.989225
XLOC_003221	chr3	113432277	113433137	-	860						790			0	1.90961
XLOC_003222	chr3	117397473	117410046	-	12573	chr16	40307818	40318805	+	10987	984	858	0.0684	0	0.503946	0.041549
XLOC_003225	chr3	120084473	120086653	-	2180	chr16	37854595	37856971	+	2376	1185	1239	0.02228	0	0.022025	0.427492
XLOC_003226	chr3	120530351	120555220	-	24869	chr16	37453416	37479689	+	26273	1944	1970	0.00664	0	0.302073	1.37102
XLOC_003228	chr3	124788639	124798378	-	9739	chr16	33666731	33671661	+	4930	3524	200	0.89259	0	2.2047	0.154494
XLOC_003234	chr3	125984828	125994041	-	9213	chr6	90451799	90459561	+	7762	2229	1380	0.23525	0	1.35899	0.073596
XLOC_003235	chr3	126006729	126020383	-	13654	chr6	90440887	90445304	+	4417	6553	771	0.78946	0	0.910759	0.034349
XLOC_003239	chr3	127041150	127109513	-	68363	chr6	88981398	89017032	+	35634	1170	168	0.74888	189	0.661641	1.4428
XLOC_003240	chr3	127199532	127257825	-	58293	chr6	88890939	88911283	+	20344	9242	1357	0.74394	0	0.443363	0.169849
XLOC_003243	chr3	127752227	127763759	-	11532						733			156	0.193524
XLOC_003245	chr3	128719319	128720388	-	1069	chr6	87680131	87680821	-	690	597	425	0.1683	0	0.216114	0.063422
XLOC_003249	chr3	129832345	129839595	-	7250	chr16	5257632	5258864	-	1232	1324	84	0.88068	0	1.06321	0.704356
XLOC_003250	chr3	129985908	129995570	-	9662	chr9	105890226	105898408	+	8182	1072	438	0.41987	0	1.05906	4.67522
XLOC_003261	chr3	134042591	134059334	-	16743	chr9	102649544	102671688	+	22144	3531	3734	0.02794	0	0.548091	0.132139
XLOC_003262	chr3	134294593	134299804	-	5211	chr9	102473844	102480370	+	6526	943	3449	0.57058	0	0.451341	0.008959
XLOC_003263	chr3	134979869	135158671	-	178802	chr9	101645327	101823755	+	178428	1121	1296	0.0724	0	1.4656	8.96212
XLOC_003264	chr3	135551401	135559458	-	8057	chr9	101271818	101282876	+	11058	811	775	0.0227	0	0.45054	0.04468
XLOC_003273	chr3	147406752	147450204	-	43452	chr9	90933995	90954418	+	20423	230	125	0.29577	0	0.39716	31.6533
XLOC_003275	chr3	147913515	147997885	-	84370	chr9	90335339	90448873	+	113534	679	172	0.59577	0	0.999377	15.7952
XLOC_003280	chr3	149101965	149103587	-	1622	chr3	57105850	57107828	-	1978	1001	1169	0.07742	108	0.090224	0.060364
XLOC_003281	chr3	149735042	149740537	-	5495						959			0	0.80284
XLOC_003282	chr3	149919960	149942977	-	23017	chr3	57938407	57963579	-	25172	606	500	0.09584	0	0.581416	8.84536
XLOC_003284	chr3	150452162	150456770	-	4608	chr3	58466650	58477022	-	10372	1309	789	0.24786	0	1.00688	0.491903
XLOC_003286	chr3	151256967	151318744	-	61777	chr3	59189720	59259250	-	69530	409	252	0.23752	0	1.40386	529.005
XLOC_003289	chr3	151835961	151869513	-	33552	chr3	60134592	60168212	-	33620	554	184	0.50135	0	0.460895	7.16292
XLOC_003292	chr3	153102722	153105157	-	2435	chr3	61387487	61392876	-	5389	1958	4894	0.42849	99	0.477648	0.006153
XLOC_003298	chr3	154687071	154688012	-	941	chr3	62984998	62985848	-	850	521	335	0.21729	0	0.225424	0
XLOC_003303	chr3	156799456	156840791	-	41335	chr3	65667154	65727217	-	60063	2015	2998	0.19609	0	2.58243	0.259263
XLOC_003305	chr3	157734004	157806786	-	72782	chr3	66668482	66768722	-	100240	835	834	0.0006	0	0.046885	1.93453
XLOC_003310	chr3	161534696	161539696	-	5000	chr3	70172252	70187838	-	15586	483	460	0.02439	0	0.216142	0.420772
XLOC_003318	chr3	166641737	166643655	-	1918						363			0	0.359492
XLOC_003322	chr3	168746749	168749572	-	2823	chr3	29781006	29781538	-	532	335	204	0.24304	93	0	0
XLOC_003323	chr3	169672015	169684522	-	12507	chr3	30673626	30692173	-	18547	1737	2141	0.10418	0	0.533402	0.094706
XLOC_003326	chr3	171594141	171618530	-	24389	chr3	27729295	27760456	+	31161	427	337	0.1178	195	0.600858	16.0792
XLOC_003327	chr3	172278677	172313397	-	34720						3739	261	0.8695	90	0.093664
XLOC_003331	chr3	176321930	176354567	-	32637	chr3	22687787	22753520	+	65733	1291	479	0.45876	105	0.090973	0.668862
XLOC_003337	chr3	178819158	178865761	-	46603						346	28	0.85027	0	0.942887
XLOC_003338	chr3	179243601	179245572	-	1971	chr3	32567391	32568887	-	1496	227	40	0.70037	0	0.399883	3.4458
XLOC_003343	chr3	181091677	181160296	-	68619	chr3	34272506	34333929	-	61423	1766	1540	0.06836	0	1.85113	3.69308
XLOC_003345	chr3	181281326	181283447	-	2121	chr3	34407350	34409523	-	2173	469	459	0.01078	0	0.556484	0.233001
XLOC_003347	chr3	181867282	181895007	-	27725	chr3	34910472	34931307	-	20835	737	229	0.52588	0	0.19477	1.33052
XLOC_003350	chr3	182506062	182508355	-	2293	chr3	35647306	35650627	-	3321	255	700	0.46597	0	0.97232	1.73135
XLOC_003358	chr3	186172770	186211450	-	38680	chr16	22733493	22768810	-	35317	3350	1817	0.29669	0	0.159711	1.18853
XLOC_003361	chr3	186528668	186543310	-	14642	chr16	23128618	23137426	-	8808	1832	465	0.59512	0	0.36604	3.0666
XLOC_003370	chr3	190415711	190416637	-	926	chr16	26780011	26780278	-	267	526	267	0.32661	183	0	0
XLOC_003371	chr3	190500011	190500863	-	852	chr16	26861765	26882559	-	20794	367	189	0.32014	168	0.106672	0.373363
XLOC_003372	chr3	190506446	190511383	-	4937						335			96	0.233723
XLOC_003378	chr3	193551437	193555388	-	3951	chr16	29780560	29784846	-	4286	352	308	0.06667	0	1.37757	0.09294
XLOC_003380	chr3	193565531	193570323	-	4792	chr16	29794500	29798234	-	3734	2837	143	0.90403	0	0.248094	12.8943
XLOC_003383	chr3	193848404	193848990	-	586	chr16	30060198	30060806	-	608	430	447	0.01938	0	0.374188	0
XLOC_003384	chr3	193919494	193967942	-	48448	chr16	30116767	30172412	-	55645	2438	3492	0.17774	96	1.79881	11.0385
XLOC_003385	chr3	194006426	194030593	-	24167	chr16	30215296	30234352	-	19056	9870	3120	0.51963	0	0.33143	0.123458
XLOC_003386	chr3	194482846	194489441	-	6595	chr16	30673632	30678259	-	4627	725	271	0.45582	0	0.088979	0.249405
XLOC_003399	chr3	196358368	196359460	-	1092	chr16	32177339	32178229	+	890	350	187	0.30354	0	0.596551	0.571096
XLOC_003403	chr3	197177197	197183525	-	6328	chr16	31509310	31517181	+	7871	600	189	0.52091	0	0.391487	1.1444
XLOC_003410	chr3	197863215	197866338	-	3123						374			252	0.072382
XLOC_003411	chr4	570751	617100	+	46349	chr5	108797516	108815299	+	17783	5159	1365	0.58155	165	1.41032	1.60388
XLOC_003417	chr4	1031540	1045258	+	13718	chr5	109144741	109154839	+	10098	790			0	0.428337
XLOC_003422	chr4	1546984	1555291	+	8307	chr5	33859044	33863671	+	4627	8307	4627	0.28452	0	1.03653	0.518322
XLOC_003427	chr4	3546452	3550523	+	4071						1174	152	0.77074	0	0.077808
XLOC_003428	chr4	3578595	3592715	+	14120	chr5	35476861	35481251	+	4390	3079	1465	0.35519	324	0.752442	0
XLOC_003434	chr4	4922512	4935669	+	13157	chr5	38174049	38183752	-	9703	304	51	0.71268	0	1.9746	2.09402
XLOC_003441	chr4	6765263	6769333	+	4070	chr5	37108649	37110826	-	2177	335	289	0.07372	0	0.480301	0.381542
XLOC_003444	chr4	8321886	8325694	+	3808						841			0	1.84984
XLOC_003448	chr4	9173537	9174908	+	1371						424			105	0.060511
XLOC_003450	chr4	10409916	10411772	+	1856						322			0	0.176215
XLOC_003453	chr4	10739198	10751216	+	12018	chr5	39329995	39345589	+	15594	1243	1141	0.04279	0	1.80573	0.044506
XLOC_003454	chr4	10760724	10810544	+	49820	chr5	39358728	39416768	+	58040	347	451	0.13033	0	0.752136	3.75516
XLOC_003455	chr4	11315419	11352918	+	37499	chr5	39918512	39976097	+	57585	768	1144	0.19665	93	0.594706	0.211879
XLOC_003457	chr4	11466107	11815582	+	349475	chr5	40067580	40453184	+	385604	2420	1488	0.23849	162	2.2317	1.0781
XLOC_003461	chr4	13492920	13520604	+	27684	chr5	42110118	42131873	+	21755	491	437	0.05819	93	0.375579	1.22366
XLOC_003463	chr4	13990449	14094956	+	104507	chr5	42630834	42734325	+	103491	1335	1011	0.13811	204	1.06741	1.08187
XLOC_003469	chr4	16321721	16357365	+	35644	chr5	44716612	44745069	+	28457	345	184	0.30435	0	2.38106	4.1982
XLOC_003474	chr4	23781075	23784409	+	3334	chr5	51834702	51837704	+	3002	913	886	0.01501	126	1.90315	0.348057
XLOC_003479	chr4	26072412	26105853	+	33441	chr5	53790669	53819412	+	28743	1607	584	0.46691	0	0.088272	0.141608
XLOC_003480	chr4	26765708	26766256	+	548						329			0	0.196079
XLOC_003481	chr4	26784348	26784724	+	376	chr5	54317457	54317737	+	280	229	166	0.15949	0	0.796121	0
XLOC_003482	chr4	26789736	26790828	+	1092	chr5	54321175	54322303	+	1128	720	575	0.11197	147	0.522307	0.049784
XLOC_003483	chr4	26846789	26860575	+	13786	chr5	54374055	54387946	+	13891	1181	1051	0.05824	96	1.53723	0.571967
XLOC_003485	chr4	27738267	27751818	+	13551	chr5	55239991	55249100	+	9109	248	110	0.38547	0	1.42072	1.12138
XLOC_003491	chr4	29119794	29204392	+	84598	chr5	56657192	56722096	+	64904	929			0	0.716391
XLOC_003493	chr4	31172765	31213297	+	40532	chr5	58554416	58593206	+	38790	507	123	0.60952	153	0.231464	4.34126
XLOC_003498	chr4	32226644	32230663	+	4019						1059	209	0.67035	117	0.468573
XLOC_003499	chr4	32352659	32354842	+	2183	chr5	59724504	59724833	+	329	849	329	0.44143	0	0.399633	0
XLOC_003506	chr4	37003463	37020620	+	17157	chr5	63806860	63815574	+	8714	735	642	0.06754	132	0.248563	0.105278
XLOC_003508	chr4	38281623	38289952	+	8329	chr5	64857872	64868618	+	10746	893	1121	0.11321	0	0.248424	0.428704
XLOC_003511	chr4	38533852	38548334	+	14482	chr5	65076304	65080188	+	3884	454	164	0.46926	99	0.413593	3.09643
XLOC_003514	chr4	38749926	38754586	+	4660	chr5	65267358	65269209	+	1851	2176	1370	0.2273	183	0.319431	0.532752
XLOC_003515	chr4	39135532	39137228	+	1696	chr5	65571949	65573361	+	1412	455	302	0.20211	0	2.15118	0.089252
XLOC_003523	chr4	42240721	42253256	+	12535	chr5	67888101	67896397	+	8296	513	398	0.12623	246	0.553035	0
XLOC_003524	chr4	42708123	42709352	+	1229	chr5	68270736	68273142	+	2406	1128	2301	0.34208	0	0.103465	0.014687
XLOC_003526	chr4	43342429	43347617	+	5188	chr5	68846324	68851160	+	4836	990	807	0.10184	321	0.013181	0
XLOC_003527	chr4	43765514	43768276	+	2762	chr5	69142225	69149855	+	7630	2076	7511	0.56691	0	0.153433	0.009493
XLOC_003528	chr4	44018877	44024080	+	5203	chr5	69355787	69357017	+	1230	2823	1230	0.39304	0	1.33593	0.028983
XLOC_003536	chr4	52910970	52913124	+	2154						616			0	2.05488
XLOC_003538	chr4	53656160	53681631	+	25471						727	277	0.44821	234	0.66874
XLOC_003539	chr4	55199036	55224233	+	25197	chr5	75619094	75644737	+	25643	528	486	0.04142	159	1.14304	1.42502
XLOC_003541	chr4	55711733	55725407	+	13674	chr5	76144347	76157192	+	12845	465	98	0.65187	129	1.34705	2.59089
XLOC_003542	chr4	55809795	55822985	+	13190	chr5	76233204	76244235	+	11031	422	417	0.00596	0	0	0.426329
XLOC_003544	chr4	56244391	56254858	+	10467	chr5	76592843	76600447	+	7604	2930	101	0.93336	171	0.577893	5.9387
XLOC_003547	chr4	58017921	58071676	+	53755	chr5	77875510	77928488	+	52978	4066	3748	0.0407	177	0.268635	0.055433
XLOC_003548	chr4	58292037	58332152	+	40115	chr5	78214887	78248865	+	33978	1260	1408	0.05547	0	0.033739	0.072133
XLOC_003551	chr4	59849999	59912677	+	62678						749	217	0.55072	0	1.91649
XLOC_003554	chr4	62009373	62019680	+	10307	chr5	81358234	81373087	+	14853	829	807	0.01345	0	0.188896	0.692188
XLOC_003555	chr4	62999461	63027983	+	28522	chr5	82272690	82296689	+	23999	4417	1333	0.53635	171	2.54138	0.025977
XLOC_003557	chr4	64627274	64651637	+	24363	chr5	83401100	83417843	+	16743	639	307	0.35095	111	0.755608	0.689567
XLOC_003558	chr4	66535678	66559104	+	23426	chr5	84845745	84866473	+	20728	1177	1230	0.02202	0	1.2107	3.06796
XLOC_003559	chr4	66567919	66571271	+	3352	chr5	84882434	84883557	+	1123	385	139	0.46947	0	0.174178	0
XLOC_003561	chr4	66734675	66744701	+	10026	chr5	85025007	85046552	+	21545	542	314	0.26636	129	0	0.485173
XLOC_003567	chr4	70999320	71012421	+	13101	chr5	88246381	88253013	+	6632	432	336	0.125	219	0.302073	0.106099
XLOC_003572	chr4	74374519	74399845	+	25326	chr5	90991192	91007039	+	15847	3216	6942	0.3668	258	7.70298	0.085229
XLOC_003574	chr4	75806108	75808265	+	2157						925			105	1.89042
XLOC_003576	chr4	76279285	76287774	+	8489	chr5	92289060	92294565	+	5505	1306	1340	0.01285	162	0.021723	0.022471
XLOC_003577	chr4	76326404	76348233	+	21829	chr5	92328608	92335184	+	6576	800	831	0.01901	0	0.083821	0.084917
XLOC_003578	chr4	76744127	76746496	+	2369						311			0	0.37764
XLOC_003590	chr4	83206176	83218667	+	12491	chr5	100335317	100353977	+	18660	417	416	0.0012	102	0.71976	0.749144
XLOC_003603	chr4	89206093	89262948	+	56855						2147	110	0.90253	183	1.43674
XLOC_003604	chr4	89282460	89283590	+	1130						1026			0	0.368847
XLOC_003613	chr4	99064930	99090451	+	25521	chr3	138833610	138868328	-	34718	362	342	0.02841	96	0.744534	0.206332
XLOC_003615	chr4	99579917	99599748	+	19831	chr3	138386637	138405105	-	18468	2085	1906	0.04485	0	1.35082	0.046637
XLOC_003616	chr4	99884747	99885532	+	785						466			0	0.532063
XLOC_003629	chr4	104346198	104374914	+	28716	chr3	134669021	134700162	-	31141	816	121	0.74173	108	2.99265	6.17822
XLOC_003636	chr4	107354682	107378478	+	23796	chr3	132201738	132223851	-	22113	962	405	0.40746	96	0.067825	0.348472
XLOC_003640	chr4	109590008	109592299	+	2291	chr3	130395796	130397192	-	1396	1264	62	0.90649	0	0.291787	0
XLOC_003641	chr4	109592410	109602985	+	10575	chr3	130394231	130395605	-	1374	4819	878	0.69177	0	0.391502	0.070246
XLOC_003646	chr4	111288132	111291542	+	3410						580			171	1.13795
XLOC_003647	chr4	111715558	111718500	+	2942	chr3	128770577	128773462	-	2885	556	654	0.08099	0	0	0
XLOC_003648	chr4	112561650	112569964	+	8314	chr3	128032660	128042261	-	9601	610	1260	0.34759	0	0.694668	0.120908
XLOC_003649	chr4	112723102	112761042	+	37940	chr3	127873800	127888743	-	14943	1934	891	0.3692	0	0.310382	0.479439
XLOC_003650	chr4	113437963	113439635	+	1672	chr3	127333853	127335449	-	1596	915	842	0.04155	0	0.927018	0.032739
XLOC_003652	chr4	115379251	115412059	+	32808	chr3	125703691	125713378	-	9687	350			0	0.111853
XLOC_003657	chr4	117274142	117276371	+	2229	chr3	124231347	124233052	-	1705	1405	1705	0.09646	0	1.12262	0.059568
XLOC_003658	chr4	118281778	118294008	+	12230						893	114	0.77358	99	0.453008
XLOC_003662	chr4	119532090	119539356	+	7266						239			0	1.48382
XLOC_003665	chr4	119763228	119772488	+	9260						775			0	0.658932
XLOC_003666	chr4	119804940	119805840	+	900						789			312	0.042496
XLOC_003671	chr4	121560244	121571951	+	11707						552			93	0.366021
XLOC_003679	chr4	124247729	124249559	+	1830						470			0	0.524223
XLOC_003680	chr4	124411162	124448834	+	37672	chr3	37598663	37612766	+	14103	1548	77	0.90523	108	0.202319	11.85
XLOC_003682	chr4	124949080	124949446	+	366	chr3	37947551	37948271	+	720	262	270	0.01504	0	0.494947	0.098086
XLOC_003684	chr4	126991862	126993159	+	1297	chr3	39358691	39359753	+	1062	300	193	0.21704	0	0.956968	0
XLOC_003686	chr4	129575029	129581852	+	6823	chr3	41227516	41234496	+	6980	324	312	0.01887	108	0.878614	19.2056
XLOC_003690	chr4	132694456	132712637	+	18181	chr3	44152295	44157036	+	4741	1198	809	0.19382	0	1.41606	0.035651
XLOC_003691	chr4	133452274	133467632	+	15358	chr3	44634275	44639184	+	4909	311			108	0.33568
XLOC_003694	chr4	135548787	135561139	+	12352	chr3	46582678	46596087	+	13409	435			0	0.897972
XLOC_003695	chr4	135680553	135738444	+	57891						489	106	0.6437	0	0.20987
XLOC_003700	chr4	138114909	138119520	+	4611	chr3	49064530	49069922	+	5392	1575	1471	0.03414	117	0.28999	0
XLOC_003703	chr4	138586685	138601440	+	14755	chr3	49714280	49726256	+	11976	663	252	0.44918	159	0.098413	4.66169
XLOC_003704	chr4	138676240	138678728	+	2488	chr3	49805579	49808626	+	3047	2339	2899	0.10691	0	0.212006	0.011657
XLOC_003705	chr4	138728859	138737556	+	8697	chr3	49857518	49875844	+	18326	258			0	0
XLOC_003712	chr4	140489677	140499616	+	9939	chr3	51377844	51385023	+	7179	547	452	0.0951	0	0.524845	3.62802
XLOC_003714	chr4	143772644	143778965	+	6321	chr8	83851911	83857573	-	5662	741	639	0.07391	138	0.287153	0.04826
XLOC_003718	chr4	145772723	145795938	+	23215	chr8	82430329	82446130	-	15801	3023	2544	0.08604	0	0.600029	0.032508
XLOC_003719	chr4	146520213	146522021	+	1808	chr8	81830324	81832105	-	1781	767	596	0.12546	0	0.697564	0.426019
XLOC_003721	chr4	147032733	147034564	+	1831						756			0	1.17377
XLOC_003724	chr4	147555778	147559915	+	4137	chr8	80960660	80964699	-	4039	808	760	0.03061	0	0.339159	0.036272
XLOC_003729	chr4	149614150	149621313	+	7163	chr8	79137677	79144910	-	7233	589	297	0.32957	0	0.310176	3.186
XLOC_003734	chr4	152588375	152591654	+	3279	chr3	85458325	85461132	-	2807	2993	2577	0.07469	105	15.2176	0.418381
XLOC_003737	chr4	152877105	152890531	+	13426	chr3	85162316	85178461	-	16145	2714	3046	0.05764	0	1.39439	0.100891
XLOC_003738	chr4	153021905	153025789	+	3884	chr3	85008308	85011150	-	2842	1573	752	0.35312	159	2.53863	0.047406
XLOC_003739	chr4	153071425	153073566	+	2141	chr3	84966290	84967076	-	786	471	248	0.31015	0	0.166236	0
XLOC_003741	chr4	153602154	153602597	+	443	chr3	84468989	84469383	-	394	221	223	0.0045	102	0.064187	0.405085
XLOC_003749	chr4	156363958	156368776	+	4818	chr3	82121056	82137417	-	16361	568	176	0.52688	0	0.448618	1.34468
XLOC_003750	chr4	156436878	156438611	+	1733	chr3	82064996	82065738	-	742	519	340	0.20838	0	0.1749	0
XLOC_003756	chr4	157563417	157565001	+	1584	chr3	81134609	81135289	-	680	813	377	0.36639	90	1.05937	0
XLOC_003758	chr4	158493641	158497295	+	3654						1482			264	0.011312
XLOC_003764	chr4	163661819	163813536	+	151717	chr8	69629906	69760315	-	130409	797	63	0.85349	0	1.39666	16.104
XLOC_003765	chr4	164029936	164041790	+	11854	chr8	69417601	69432483	-	14882	2456	2015	0.09864	0	4.96693	0.452827
XLOC_003769	chr4	166420979	166424851	+	3872	chr8	67065036	67068403	-	3367	231	139	0.24865	0	24.2398	0.232081
XLOC_003771	chr4	169931531	169932431	+	900	chr8	63965545	63966387	-	842	756	842	0.05382	0	0.345226	0.076625
XLOC_003772	chr4	170833982	170862823	+	28841	chr8	63201640	63234737	-	33097	2626	248	0.82742	0	1.06177	6.81337
XLOC_003775	chr4	171147755	171204866	+	57111	chr8	62827036	62921532	-	94496	2185	868	0.43138	117	0.800293	1.09751
XLOC_003777	chr4	171961723	171980314	+	18591						3661			0	0.213869
XLOC_003780	chr4	174275060	174278723	+	3663						571			0	0.274246
XLOC_003782	chr4	174428626	174434499	+	5873	chr8	59816472	59821642	-	5170	4349	3824	0.06424	174	0.78548	0.261184
XLOC_003783	chr4	174438540	174439852	+	1312	chr8	59811284	59812530	-	1246	309	286	0.03866	0	0.665073	3.22357
XLOC_003784	chr4	174439876	174440761	+	885	chr8	59810440	59811260	-	820	717	680	0.02649	0	0.224409	0.112983
XLOC_003787	chr4	175444201	175451355	+	7154	chr8	58765677	58772803	-	7126	926	712	0.13065	0	0.471602	0.046265
XLOC_003789	chr4	175750818	175802532	+	51714	chr8	58387532	58418857	-	31325	2707	300	0.80047	114	0.42446	0.711967
XLOC_003791	chr4	177302225	177372087	+	69862	chr8	55521949	55574297	-	52348	447	354	0.1161	153	0.729894	1.05588
XLOC_003793	chr4	177796855	177801759	+	4904						691	399	0.26789	0	0
XLOC_003795	chr4	178514674	178544931	+	30257	chr8	54453144	54481876	-	28732	216			0	3.20198
XLOC_003797	chr4	178887796	178911876	+	24080	chr8	54084164	54110945	-	26781	557	416	0.14491	141	0.632564	0.770156
XLOC_003802	chr4	184393763	184400227	+	6464						243	289	0.08647	0	1.77216
XLOC_003803	chr4	184434392	184478022	+	43630	chr8	48722535	48752060	-	29525	303	206	0.19057	0	9.69532	20.326
XLOC_003809	chr4	185748077	185769013	+	20936	chr8	47531434	47553025	-	21591	4109	3443	0.08819	204	0.50867	0.341081
XLOC_003811	chr4	185882456	185883921	+	1465						254			0	4.43321
XLOC_003812	chr4	185910150	185926340	+	16190	chr8	47391530	47399238	-	7708	911	1412	0.21567	0	2.66139	0.163233
XLOC_003820	chr4	186936733	186940103	+	3370	chr8	46540634	46542556	-	1922	773	1150	0.19605	0	0.329644	0.02508
XLOC_003821	chr4	187137129	187137707	+	578						415			204	1.26582
XLOC_003824	chr4	187981252	187982084	+	832	chr8	45692307	45693527	-	1220	421	416	0.00597	0	0.277218	0
XLOC_003825	chr4	188123139	188135298	+	12159	chr8	45502915	45509066	-	6151	2837	1558	0.29101	189	0.271387	0.138553
XLOC_003826	chr4	188291801	188293075	+	1274	chr8	45313097	45314592	-	1495	498	512	0.01386	156	0	0.297548
XLOC_003829	chr4	188534085	188647874	+	113789	chr8	44934130	45039882	-	105752	3498	995	0.55709	0	1.07441	5.87846
XLOC_003832	chr4	189080967	189082293	+	1326	chr8	44210140	44210955	-	815	1230	815	0.20293	0	0.679001	0
XLOC_003834	chr4	189321889	189523060	+	201171	chr8	43764921	43961224	-	196303	4056	1408	0.48463	0	1.15235	0.721328
XLOC_003837	chr4	189717667	189718050	+	383						262			0	0.049807
XLOC_003838	chr4	190114253	190126031	+	11778	chr8	43227410	43240935	-	13525	465	202	0.3943	0	0.145543	0.264344
XLOC_003839	chr4	190197915	190198838	+	923						709			0	0.220083
XLOC_003840	chr4	190470756	190498185	+	27429	chr8	42884733	42914787	-	30054	2060	1378	0.19837	504	1.43799	0.284573
XLOC_003842	chr4	190598740	190600367	+	1627						966	186	0.67708	162	0.243159
XLOC_003843	chr4	190802232	190806061	+	3829						981	589	0.24968	0	2.48753
XLOC_003853	chr4	1573435	1582249	-	8814	chr5	33879923	33887624	-	7701	890	575	0.21502	369	1.92329	0.088316
XLOC_003854	chr4	2011390	2043486	-	32096						2641			0	1.28226
XLOC_003857	chr4	3051280	3064341	-	13061						326	153	0.36117	0	0.957293
XLOC_003861	chr4	3675320	3679582	-	4262	chr5	35540626	35541129	-	503	1032			0	0.083953
XLOC_003863	chr4	4562119	4577798	-	15679						1173	710	0.24588	120	1.45737
XLOC_003865	chr4	4923786	4924981	-	1195	chr5	38182270	38183313	+	1043	982	842	0.07675	123	0.863769	0
XLOC_003867	chr4	6305742	6309206	-	3464						275			0	0.787518
XLOC_003870	chr4	6672409	6675587	-	3178						731			129	1.91327
XLOC_003871	chr4	6689174	6692251	-	3077						1826			90	0.870645
XLOC_003872	chr4	7096297	7105186	-	8889	chr5	36793823	36795094	+	1271	2453	171	0.86966	0	0.49952	0
XLOC_003878	chr4	9376808	9388085	-	11277	chr7	13000733	13001992	-	1259	234	83	0.47634	0	0.694126	0
XLOC_003880	chr4	9682415	9693365	-	10950	chr16	5256399	5258866	+	2467	261	10	0.9262	0	1.96846	0
XLOC_003882	chr4	11742037	11771223	-	29186	chr5	40369649	40392672	-	23023	3197	1188	0.45815	0	0.858698	0.072832
XLOC_003889	chr4	13841059	13842697	-	1638	chr5	42448024	42449230	-	1206	468	324	0.18182	0	0.458507	0.110028
XLOC_003895	chr4	16115964	16122540	-	6576	chr5	44519684	44524528	-	4844	822	544	0.20351	102	0.301632	0.127306
XLOC_003897	chr4	17173380	17187680	-	14300	chr5	45497444	45510024	-	12580	1701	1773	0.02073	0	0.030687	0.597476
XLOC_003898	chr4	17460263	17462011	-	1748	chr5	45808666	45809021	-	355	701	270	0.44387	0	0.388436	0
XLOC_003904	chr4	22346155	22348426	-	2271	chr5	50313237	50316363	-	3126	292	205	0.17505	0	0.784188	0.743143
XLOC_003908	chr4	24473714	24474219	-	505	chr5	52506333	52506851	-	518	314	324	0.01567	0	0.394172	0.104303
XLOC_003909	chr4	25432809	25436119	-	3310						265			0	0.443193
XLOC_003910	chr4	25554573	25556581	-	2008	chr5	53371207	53373671	-	2464	737	733	0.00272	0	0.367628	0.242536
XLOC_003911	chr4	25866409	25871707	-	5298	chr5	53606457	53611754	-	5297	1536	1790	0.07637	0	0.489663	0.319618
XLOC_003912	chr4	26861427	26862250	-	823	chr5	54388838	54389596	-	758	617	549	0.05832	0	2.47455	0.056831
XLOC_003917	chr4	28345392	28395901	-	50509	chr5	55775396	55824356	-	48960	840	499	0.25467	0	0.854435	1.60513
XLOC_003926	chr4	38278023	38281503	-	3480	chr5	64854767	64857738	-	2971	444	456	0.01333	90	0.264518	0.07411
XLOC_003927	chr4	38422282	38524801	-	102519	chr5	64996422	65067841	-	71419	2059	1374	0.19953	0	0.358702	0.349765
XLOC_003932	chr4	39540663	39545555	-	4892						844			0	2.23431
XLOC_003934	chr4	41222114	41223379	-	1265	chr5	67017129	67018247	-	1118	277	208	0.14227	0	0.060522	0.148259
XLOC_003937	chr4	41874780	41884628	-	9848	chr5	67613110	67622963	-	9853	2359	1898	0.10829	0	0.272239	24.8058
XLOC_003940	chr4	43459543	43494560	-	35017						582	412	0.17103	0	0.156953
XLOC_003950	chr4	55702326	55711568	-	9242	chr5	76134714	76144164	-	9450	732	738	0.00408	105	0.802227	0.104104
XLOC_003959	chr4	58291142	58291939	-	797	chr5	78213799	78214510	-	711	471	390	0.09408	0	0.13853	0.069113
XLOC_003961	chr4	59390679	59431369	-	40690	chr5	79316091	79354613	-	38522	929	599	0.21597	102	0.491641	1.61076
XLOC_003962	chr4	59646790	59853878	-	207088						2273			114	0.866909
XLOC_003965	chr4	60633533	60657832	-	24299	chr5	80269865	80303791	-	33926	760	315	0.41395	0	0.055358	0.483633
XLOC_003967	chr4	63316227	63320355	-	4128	chr5	82548053	82553666	-	5613	232	217	0.03341	0	1.12496	0.468032
XLOC_003970	chr4	64328224	64359996	-	31772						4288			132	0.684953
XLOC_003971	chr4	65779999	65870218	-	90219	chr5	84133464	84197979	-	64515	4078	101	0.95166	0	0.176773	5.29444
XLOC_003973	chr4	69601915	69616639	-	14724						604			105	5.39675
XLOC_003975	chr4	70999320	71012421	-	13101	chr5	88246381	88253013	-	6632	432	336	0.125	0	0.060415	0
XLOC_003985	chr4	76103903	76105665	-	1762	chr5	92167486	92168565	-	1079	242	253	0.02222	0	0.389616	0.139458
XLOC_003991	chr4	77829329	77831274	-	1945	chr5	93479366	93480482	-	1116	1000	221	0.638	108	0.318528	6.97173
XLOC_003993	chr4	78075945	78077856	-	1911	chr5	93694296	93696077	-	1781	435	319	0.15385	0	0.346854	0.094393
XLOC_003999	chr4	83534266	83542590	-	8324	chr5	100631271	100639363	-	8092	950	519	0.2934	282	0.178573	0.800627
XLOC_004009	chr4	88183082	88187974	-	4892						257			0	0.240798
XLOC_004016	chr4	90459366	90472707	-	13341						1088			123	0.659674
XLOC_004019	chr4	95664950	95679011	-	14061	chr3	141832238	141841303	+	9065	876	741	0.08349	0	3.02404	0.137062
XLOC_004023	chr4	99706579	99708527	-	1948	chr3	138271642	138272907	+	1265	461	110	0.61471	0	0.271542	0
XLOC_004032	chr4	106058436	106061776	-	3340						549	307	0.28271	159	1.27689
XLOC_004045	chr4	111923365	111935138	-	11773	chr3	128540204	128546974	+	6770	284	127	0.382	90	0.321644	19.6608
XLOC_004049	chr4	115233101	115286113	-	53012	chr3	125762864	125808972	+	46108	718	201	0.56257	0	1.51298	6.29192
XLOC_004050	chr4	117410519	117436302	-	25783						406			354	0.867828
XLOC_004051	chr4	118235752	118281795	-	46043						746			126	0.279883
XLOC_004053	chr4	119584228	119596884	-	12656	chr1	178625876	178632661	+	6785	3358	75	0.95631	111	0.272028	1.80236
XLOC_004054	chr4	120038633	120049505	-	10872						2410			117	1.27435
XLOC_004057	chr4	120559332	120578304	-	18972	chr3	122418746	122427307	+	8561	318	184	0.26693	0	0.905396	0.550994
XLOC_004058	chr4	120720250	120725675	-	5425	chr18	49778196	49781532	+	3336	781	261	0.49904	318	0.116961	0.221008
XLOC_004059	chr4	122484905	122486182	-	1277						1039			126	1.00311
XLOC_004061	chr4	124945248	124949518	-	4270	chr3	37944296	37948339	-	4043	929	853	0.04265	105	0.432719	0.075637
XLOC_004064	chr4	125421096	125479589	-	58493	chr3	38228369	38270540	-	42171	1771	729	0.4168	0	0.376664	0.139318
XLOC_004065	chr4	127149785	127164167	-	14382						387	304	0.12012	192	0.346546
XLOC_004066	chr4	127964584	127998917	-	34333	chr3	40017438	40036174	-	18736	648	537	0.09367	0	0.062089	0.472825
XLOC_004067	chr4	128015585	128017878	-	2293	chr3	40042280	40043777	-	1497	684	275	0.42649	0	0.547015	0
XLOC_004072	chr4	129489126	129491599	-	2473	chr3	41136813	41147861	-	11048	1536	3527	0.39325	0	0.35077	0.029453
XLOC_004083	chr4	134792400	134931845	-	139445	chr3	45942035	46096846	-	154811	619	125	0.66398	0	1.05974	19.1142
XLOC_004084	chr4	135854043	135855286	-	1243	chr3	46829451	46830751	-	1300	646	703	0.04225	0	0	0
XLOC_004089	chr4	137499810	137503256	-	3446	chr3	48452312	48453315	-	1003	711			141	0.216967
XLOC_004090	chr4	137717876	138133953	-	416077	chr3	48603193	49087342	-	484149	1935	2781	0.17939	0	1.15961	2.86469
XLOC_004091	chr4	138533726	138672165	-	138439	chr3	49661036	49797197	-	136161	1452	1064	0.15421	0	0.539238	0.439856
XLOC_004096	chr4	139741110	139933800	-	192690	chr3	50862827	51023932	-	161105	834	265	0.51774	99	3.02676	12.917
XLOC_004099	chr4	140522356	140527570	-	5214	chr3	51406722	51416617	-	9895	543	158	0.54922	0	0.192259	1.12814
XLOC_004102	chr4	142161892	142199943	-	38051	chr8	85234904	85283964	+	49060	1037	307	0.54315	174	0.176175	3.6287
XLOC_004104	chr4	142489833	142497244	-	7411	chr8	84983427	84990046	+	6619	344			0	0.379348
XLOC_004105	chr4	143837530	143839844	-	2314	chr8	83802987	83805394	+	2407	511	496	0.0149	111	0.255373	0.058148
XLOC_004108	chr4	145122622	145134247	-	11625	chr8	82970186	82984935	+	14749	776	1053	0.15145	114	0.4513	0.557809
XLOC_004110	chr4	146117591	146124660	-	7069	chr8	82136495	82147539	+	11044	722	317	0.3898	0	0.415706	0.899665
XLOC_004118	chr4	149862092	149863530	-	1438	chr8	78909943	78910404	+	461	370	35	0.82716	0	0.141076	0
XLOC_004120	chr4	150068953	150071438	-	2485						540			177	0.386654
XLOC_004122	chr4	152326613	152330005	-	3392	chr3	85691668	85692965	+	1297	1194	754	0.22587	138	1.08828	0
XLOC_004123	chr4	152808694	152812415	-	3721	chr3	85239836	85245143	+	5307	406	377	0.03704	93	0.064284	1.14395
XLOC_004124	chr4	152812454	152849800	-	37346	chr3	85209658	85239800	+	30142	779	91	0.7908	0	1.95995	21.5392
XLOC_004127	chr4	153128572	153147022	-	18450	chr3	84897254	84911185	+	13931	787	482	0.24035	0	0.613512	0.316067
XLOC_004132	chr4	156127680	156129583	-	1903	chr3	82352236	82354125	+	1889	1568	1605	0.01166	0	0.183093	0.050382
XLOC_004134	chr4	157033787	157065044	-	31257	chr3	81605896	81617653	+	11757	561	328	0.26209	0	1.53524	2.07248
XLOC_004135	chr4	157545913	157563834	-	17921	chr3	81134912	81157149	+	22237	904	760	0.08654	120	0.505237	0.088932
XLOC_004155	chr4	170952928	170954179	-	1251	chr8	63105828	63106534	+	706	556	440	0.11647	147	1.33781	0.080188
XLOC_004156	chr4	171196395	171201364	-	4969	chr8	62829625	62831494	+	1869	613	1869	0.50604	0	1.46887	0.02717
XLOC_004157	chr4	171663619	171664869	-	1250						614			102	0.148773
XLOC_004158	chr4	172210625	172219418	-	8793						4949			0	0.008501
XLOC_004160	chr4	172523833	172577960	-	54127	chr8	61537580	61570960	+	33380	630	274	0.39381	0	0.724975	0.252753
XLOC_004161	chr4	174046339	174048952	-	2613	chr8	60173924	60175400	+	1476	214	206	0.01905	0	0.487834	0.287669
XLOC_004165	chr4	174264470	174291953	-	27483	chr8	59966736	59978224	+	11488	1800	888	0.33929	0	1.50563	7.48385
XLOC_004166	chr4	174374163	174442111	-	67948	chr8	59808881	59877193	+	68312	3118	2278	0.15567	0	2.17091	0.927472
XLOC_004167	chr4	174615437	174620132	-	4695	chr8	59646539	59657679	+	11140	3711	9570	0.44116	0	2.61649	0.022319
XLOC_004168	chr4	174798621	174834403	-	35782	chr8	59438389	59465144	+	26755	1230	831	0.1936	93	0.396813	0.488871
XLOC_004177	chr4	176366444	176372576	-	6132						243			0	0.530947
XLOC_004182	chr4	178134765	178222346	-	87581	chr8	54732266	54797386	+	65120	1198	39	0.93694	0	1.26356	2.73833
XLOC_004184	chr4	178607826	178612222	-	4396	chr8	54405698	54409572	+	3874	255	217	0.08051	0	0.055629	4.5565
XLOC_004188	chr4	181448688	181453970	-	5282	chr8	51507739	51511424	+	3685	792	759	0.02128	0	0.296581	0.334529
XLOC_004191	chr4	181985244	182080302	-	95058	chr8	50895048	51002608	+	107560	590	464	0.11954	0	0.454634	72.1094
XLOC_004192	chr4	182178897	182186252	-	7355	chr8	50789908	50798335	+	8427	4075	4372	0.03516	123	0.266581	0.100486
XLOC_004193	chr4	182741171	182751126	-	9955	chr8	50226550	50247836	+	21286	401	261	0.21148	0	0.195255	3.478
XLOC_004196	chr4	183994215	183998865	-	4650	chr8	49097994	49102413	+	4419	554	69	0.77849	0	0.25314	7.23318
XLOC_004198	chr4	184254594	184271991	-	17397						1771			216	0.433521
XLOC_004202	chr4	185192862	185198481	-	5619	chr8	48029731	48034396	+	4665	686	185	0.5752	0	0.57068	0.4677
XLOC_004203	chr4	185210995	185215360	-	4365	chr8	48013906	48016086	+	2180	949	598	0.22689	0	0.770048	0.059001
XLOC_004204	chr4	185261908	185275130	-	13222	chr8	47969833	47978940	+	9107	2353	150	0.88014	141	0.159822	1.01563
XLOC_004205	chr4	185286340	185303530	-	17190	chr8	47938187	47952718	+	14531	5423	5970	0.04801	102	1.31839	0.028303
XLOC_004206	chr4	185395885	185407002	-	11117	chr8	47816679	47824933	+	8254	1098	1047	0.02378	252	4.80596	8.79733
XLOC_004207	chr4	185427372	185458712	-	31340	chr8	47772411	47805746	+	33335	1304	1146	0.06449	129	1.95416	1.63164
XLOC_004208	chr4	185764499	185776836	-	12337	chr8	47515411	47535665	+	20254	2198	1996	0.04816	156	0.886353	0.108362
XLOC_004209	chr4	185814030	185820615	-	6585	chr8	47474779	47482711	+	7932	3281	4094	0.11024	0	5.15625	0.008255
XLOC_004215	chr4	187900643	187943127	-	42484	chr8	45726398	45765298	+	38900	474	681	0.17922	0	0.628464	1.86028
XLOC_004216	chr4	188119426	188123084	-	3658	chr8	45521729	45524556	+	2827	623	592	0.02551	0	0.502712	0.097438
XLOC_004217	chr4	188225236	188230836	-	5600	chr8	45402899	45404231	+	1332	2114	416	0.67115	174	0.09765	0
XLOC_004221	chr4	188534049	188534713	-	664	chr8	45039385	45039921	+	536	524	468	0.05645	0	0.348652	0
XLOC_004222	chr4	188866787	188881648	-	14861						412			0	0.380084
XLOC_004227	chr4	189698769	189739775	-	41006	chr8	43566328	43600125	+	33797	2663	575	0.64484	0	1.524	0.464326
XLOC_004228	chr4	189911868	189923229	-	11361	chr8	43408869	43417342	+	8473	646	367	0.27542	0	0.505014	0.283055
XLOC_004229	chr4	190200224	190201335	-	1111	chr8	43154446	43154713	+	267	1049	267	0.59422	0	0.365764	0
XLOC_004231	chr4	190598434	190600102	-	1668						1075	186	0.705	0	0.352035
XLOC_004234	chr4	191028241	191030033	-	1792						301			0	0.357996
XLOC_004238	chr5	524819	526709	+	1890	chr13	74256107	74258596	-	2489	442	175	0.43274	0	0.36569	0
XLOC_004243	chr5	1042042	1042914	+	872						320			0	2.18881
XLOC_004244	chr5	1043538	1047475	+	3937						2980			0	0.731342
XLOC_004250	chr5	1931104	2067530	+	136426	chr13	73286992	73365267	-	78275	2609			0	1.27841
XLOC_004252	chr5	2069054	2069531	+	477						305			0	0.37901
XLOC_004256	chr5	2917972	2935296	+	17324						6322	343	0.89707	111	0.090823
XLOC_004257	chr5	2940841	2967742	+	26901	chr13	72605485	72622894	-	17409	1071	863	0.10755	195	0.438641	0.43075
XLOC_004258	chr5	3036784	3043131	+	6347	chr13	72549594	72551644	-	2050	1518	1032	0.19059	135	0.679127	0
XLOC_004259	chr5	3178208	3181346	+	3138	chr13	72441712	72444633	-	2921	389	326	0.08811	0	3.3211	0.098955
XLOC_004260	chr5	3337722	3345371	+	7649						2128	123	0.89072	0	0.506079
XLOC_004263	chr5	3452929	3461774	+	8845	chr13	72211455	72220267	-	8812	779	350	0.37998	174	0.184268	0.096555
XLOC_004266	chr5	4640816	4648367	+	7551	chr13	71287184	71293346	-	6162	1011	1186	0.07965	0	0.219429	0.300584
XLOC_004267	chr5	4773619	4775065	+	1446	chr13	71207281	71208712	-	1431	862	844	0.01055	132	0.423884	0
XLOC_004268	chr5	4866625	4874872	+	8247						1311	172	0.76804	0	1.49308
XLOC_004269	chr5	5034471	5070109	+	35638	chr13	71012047	71025483	-	13436	2074	427	0.65854	150	0.276847	0.763299
XLOC_004270	chr5	5688510	5701975	+	13465						4105	372	0.83382	258	0.454123
XLOC_004271	chr5	6582286	6589334	+	7048						4231			156	4.04339
XLOC_004275	chr5	6868671	6886900	+	18229						553	73	0.76677	0	0.353966
XLOC_004276	chr5	7272907	7277834	+	4927	chr13	69206546	69208599	-	2053	740	262	0.47705	0	0.493767	0
XLOC_004277	chr5	7306621	7318373	+	11752	chr13	69196050	69202084	-	6034	779	754	0.01631	105	0.536054	0.081798
XLOC_004278	chr5	7326176	7326722	+	546						332			0	0.157224
XLOC_004280	chr5	7372698	7391998	+	19300	chr13	69141948	69160705	-	18757	2131	404	0.68126	0	0.306184	4.85166
XLOC_004284	chr5	8457803	8463208	+	5405						3239			93	1.64649
XLOC_004285	chr5	8525142	8580485	+	55343						1297			159	0.422576
XLOC_004286	chr5	8839843	8881632	+	41789						1036			0	0.582554
XLOC_004290	chr5	9854488	9890049	+	35561	chr15	31879081	31915740	-	36659	729	731	0.00137	0	1.57526	0.434743
XLOC_004293	chr5	10479482	10482421	+	2939	chr15	31352402	31352985	-	583	483	45	0.82955	0	0.614381	0.640923
XLOC_004297	chr5	13986054	13987341	+	1287	chr15	28103227	28104144	-	917	538	173	0.51336	0	0.175255	1.22368
XLOC_004299	chr5	14889631	14892615	+	2984	chr15	27374112	27375604	-	1492	266	97	0.46556	0	0.453767	0.367518
XLOC_004300	chr5	14971050	14993054	+	22004	chr15	27266288	27280071	-	13783	643	616	0.02145	114	0.588549	3.76626
XLOC_004303	chr5	16442342	16446407	+	4065	chr15	25930513	25937344	-	6831	428	407	0.02515	177	0.347874	0.510473
XLOC_004306	chr5	17063336	17089310	+	25974	chr15	25449118	25466869	-	17751	705	13	0.96379	0	1.02252	5.19913
XLOC_004308	chr5	17404004	17442654	+	38650	chr15	25154721	25194209	-	39488	2683	1171	0.39232	153	0.73107	1.08185
XLOC_004309	chr5	17444118	17485937	+	41819	chr15	25100494	25152592	-	52098	1198	549	0.37149	120	1.54648	14.5699
XLOC_004319	chr5	24880279	24882020	+	1741	chr15	18492236	18493339	-	1103	407	95	0.62151	0	0.22444	0
XLOC_004321	chr5	25188426	25306281	+	117855	chr15	18070332	18180137	-	109805	3301	2308	0.17704	0	0.573216	5.73199
XLOC_004323	chr5	27472390	27496506	+	24116	chr15	16243035	16263531	-	20496	5959	822	0.75756	93	0.11253	0.108138
XLOC_004325	chr5	29143615	29183428	+	39813	chr15	15026137	15036843	-	10706	2204	221	0.81773	159	1.43285	1.95739
XLOC_004327	chr5	30102584	30106518	+	3934	chr15	14282254	14283637	-	1383	307			231	0.637601
XLOC_004330	chr5	32947548	32962571	+	15023	chr15	11654549	11660410	-	5861	2006	595	0.54248	345	0.071558	0.72703
XLOC_004331	chr5	33009099	33025830	+	16731	chr15	11621061	11629783	-	8722	599	500	0.09008	0	1.02392	0.961155
XLOC_004336	chr5	34384487	34415455	+	30968						278			0	1.0327
XLOC_004337	chr5	35938923	35940095	+	1172	chr15	9365200	9365646	-	446	374	106	0.55833	0	2.19819	0
XLOC_004341	chr5	37840630	37874996	+	34366	chr15	7719527	7760137	-	40610	641	582	0.04824	0	2.96192	8.02731
XLOC_004346	chr5	38783603	38793270	+	9667	chr15	6878120	6884549	-	6429	1007	993	0.007	105	0.408515	0.066345
XLOC_004350	chr5	39520510	39524809	+	4299	chr15	6215486	6228721	-	13235	620	2065	0.53818	90	0.927392	0.017086
XLOC_004351	chr5	40052392	40053426	+	1034	chr15	5785900	5786483	-	583	562	365	0.21251	0	0.12607	0
XLOC_004353	chr5	40389128	40389924	+	796	chr15	5483541	5484756	-	1215	320	245	0.13274	0	0.244679	1.38729
XLOC_004361	chr5	42922835	42924839	+	2004						1193			474	0.178357
XLOC_004362	chr5	42950962	42960649	+	9687						8436			339	0.213554
XLOC_004363	chr5	42994638	42997566	+	2928						1961			120	1.05612
XLOC_004364	chr5	43024143	43024564	+	421						320			0	0.25379
XLOC_004366	chr5	43065089	43100664	+	35575						14265			0	1.23921
XLOC_004381	chr5	51585584	51621194	+	35610						647	27	0.91988	0	0.282371
XLOC_004382	chr5	52405686	52410950	+	5264	chr13	115605110	115608376	-	3266	2861	1227	0.39971	99	0.907676	0.025428
XLOC_004384	chr5	53939759	53942025	+	2266	chr13	114306311	114309261	-	2950	623	880	0.17099	150	0.670282	0
XLOC_004397	chr5	56869853	56913301	+	43448	chr13	111911566	111956927	-	45361	1411	629	0.38333	0	1.41388	0.254678
XLOC_004398	chr5	56946518	56976592	+	30074	chr13	111849788	111887998	-	38210	3310	67	0.96032	0	1.29929	9.20533
XLOC_004399	chr5	59783966	59843484	+	59518	chr13	109225885	109288767	-	62882	2700	1415	0.31227	0	5.12499	12.6509
XLOC_004405	chr5	61044432	61086886	+	42454	chr13	108277422	108321017	-	43595	1044	580	0.28571	171	1.10801	4.28269
XLOC_004408	chr5	65594230	65622820	+	28590	chr13	104410678	104443652	-	32974	1485	1367	0.04137	357	0.279967	1.28904
XLOC_004412	chr5	67483760	67501722	+	17962	chr13	102546445	102571482	-	25037	1146	707	0.23691	147	0.88819	0.112375
XLOC_004416	chr5	67975967	67976938	+	971	chr13	102046680	102047514	-	834	400	308	0.12994	135	0.163119	0.164875
XLOC_004418	chr5	70741442	70742396	+	954	chr15	21040259	21041263	-	1004	567	600	0.02828	0	0.437287	0.506915
XLOC_004419	chr5	70868035	70874285	+	6250						1962			246	0.984799
XLOC_004420	chr5	70958561	70966823	+	8262	chr13	100708073	100712789	-	4716	902	267	0.5432	150	0.419553	0.972186
XLOC_004421	chr5	71865287	71867520	+	2233	chr13	99915108	99916796	-	1688	618	610	0.00651	0	0.461163	0
XLOC_004423	chr5	72509773	72590761	+	80988	chr13	99287318	99361416	-	74098	1494	1301	0.06905	183	0.796712	0.493537
XLOC_004424	chr5	72633732	72634360	+	628	chr13	99246784	99247414	-	630	301	291	0.01689	0	0.043354	0
XLOC_004429	chr5	73617455	73636616	+	19161	chr13	98291654	98308970	-	17316	1973	1889	0.02175	147	0.529125	0.161296
XLOC_004430	chr5	74244126	74271554	+	27428	chr13	97741124	97753847	-	12723	217	197	0.04831	0	1.63426	0.58123
XLOC_004431	chr5	74902445	74906582	+	4137						770	610	0.11594	0	2.76558
XLOC_004433	chr5	76272215	76276874	+	4659						219	59	0.57554	0	1.48978
XLOC_004437	chr5	76446484	76449186	+	2702	chr13	96049003	96053258	-	4255	2107	3709	0.27545	0	0.242926	0.009336
XLOC_004439	chr5	77161613	77178536	+	16923	chr13	95445920	95458830	-	12910	423	279	0.20513	0	1.06537	0.248223
XLOC_004440	chr5	77253953	77254925	+	972	chr13	95377799	95378727	-	928	422	383	0.04845	0	1.02046	0.084228
XLOC_004441	chr5	79138490	79139170	+	680	chr13	93767471	93769018	-	1547	293	1171	0.59973	0	0.613555	0.023541
XLOC_004443	chr5	81190737	81196638	+	5901	chr13	91443405	91450406	-	7001	523	132	0.59695	222	0.245283	0.456233
XLOC_004445	chr5	81676935	81682335	+	5400	chr13	90940172	90951279	-	11107	2542	2540	0.00039	0	0.117331	0.032559
XLOC_004448	chr5	82683935	82694107	+	10172	chr13	89940110	89942898	-	2788	394	35	0.83683	231	0.430569	14.2681
XLOC_004450	chr5	85649620	85664672	+	15052	chr13	86578462	86585160	-	6698	581	107	0.68895	0	0.269526	0.583185
XLOC_004452	chr5	86042634	86045588	+	2954	chr13	86038799	86040216	-	1417	2093	374	0.6968	0	0.093523	0.092586
XLOC_004456	chr5	87564711	87566950	+	2239	chr13	84360293	84361868	-	1575	741	673	0.04809	0	2.28331	0.044742
XLOC_004457	chr5	87577113	87588399	+	11286	chr13	84337224	84357517	-	20293	3233	3586	0.05177	96	1.81233	0.534223
XLOC_004459	chr5	87686218	87732860	+	46642	chr13	84164534	84206192	-	41658	1406	1079	0.13159	0	4.69791	0.791807
XLOC_004467	chr5	89705871	89712311	+	6440	chr13	81919042	81922012	-	2970	3587	1245	0.48469	0	0.550928	0.047598
XLOC_004468	chr5	90608490	90621000	+	12510	chr13	81071191	81079562	-	8371	903	1144	0.11773	219	1.05357	0.120483
XLOC_004470	chr5	91378413	91815133	+	436720	chr13	79713126	80269713	-	556587	3453	4094	0.08493	195	0.37286	1.39557
XLOC_004471	chr5	91624959	91630803	+	5844	chr13	79941274	79953459	-	12185	1138	114	0.81789	0	0	0
XLOC_004474	chr5	92424508	92426530	+	2022	chr13	78940202	78942240	-	2038	547	521	0.02434	0	0.12819	0.067721
XLOC_004475	chr5	92906434	92910714	+	4280	chr13	78347323	78351321	-	3998	2246	2059	0.04344	0	0.732077	0.70691
XLOC_004478	chr5	95179751	95185762	+	6011	chr13	75942930	75954733	-	11803	1921	7039	0.57121	117	4.35826	0.18492
XLOC_004483	chr5	96840399	97006750	+	166351	chr17	16770992	16949206	-	178214	724	942	0.13085	0	1.1175	16.1969
XLOC_004484	chr5	97217123	97258399	+	41276	chr17	16631540	16657799	+	26259	829	136	0.71813	0	0.47224	23.6788
XLOC_004490	chr5	99737144	99756452	+	19308	chr1	97109895	97139190	+	29295	1240			0	0.505144
XLOC_004495	chr5	102001910	102058026	+	56116	chr1	100039769	100087118	-	47349	663	475	0.1652	93	1.29905	1.91107
XLOC_004497	chr5	104079735	104099084	+	19349	chr17	60252870	60270298	+	17428	261	121	0.36649	0	1.19996	0.875475
XLOC_004500	chr5	107728768	107753700	+	24932						421			0	2.26275
XLOC_004502	chr5	108804804	108812483	+	7679	chr17	64724989	64737881	+	12892	519	482	0.03696	102	0.628591	0.320527
XLOC_004504	chr5	109243258	109247966	+	4708	chr17	65137436	65142306	+	4870	613	487	0.11455	0	0.234168	0
XLOC_004509	chr5	111964132	111967797	+	3665	chr18	34289844	34292583	-	2739	950	492	0.31761	0	0.105882	0
XLOC_004511	chr5	113391702	113441459	+	49757	chr18	45428587	45487324	+	58737	620	609	0.00895	93	0.951771	48.1391
XLOC_004515	chr5	115074778	115092222	+	17444						1301	612	0.36017	129	2.23157
XLOC_004517	chr5	115292234	115297015	+	4781	chr18	46980021	47008790	+	28769	2127	537	0.59685	189	9.58009	2.5933
XLOC_004524	chr5	117260702	117601730	+	341028	chr18	48985637	49296632	+	310995	1319	822	0.23213	153	9.72041	3.21245
XLOC_004526	chr5	117911269	117917019	+	5750	chr18	49613877	49617883	+	4006	581	297	0.32346	159	0.186375	0.20277
XLOC_004528	chr5	120109040	120126473	+	17433	chr18	51545653	51579286	+	33633	1442	1334	0.0389	0	0.506779	0.532939
XLOC_004533	chr5	123731295	123736088	+	4793	chr18	54820422	54825325	+	4903	675	466	0.18317	0	0.124182	0.061892
XLOC_004535	chr5	124255639	124257291	+	1652	chr18	55303236	55304861	+	1625	204	200	0.0099	0	0.511747	0
XLOC_004536	chr5	124298626	124317909	+	19283	chr18	55342568	55352640	+	10072	2360	2999	0.11924	0	0.475535	0.035661
XLOC_004539	chr5	125515269	125531403	+	16134	chr18	56325302	56339778	+	14476	1992	1044	0.31225	0	0.275141	0.265342
XLOC_004540	chr5	126565032	126567810	+	2778	chr18	57244887	57249578	+	4691	344	391	0.06395	0	0.371128	0.082504
XLOC_004545	chr5	128679235	128729628	+	50393	chr18	58902730	58935560	+	32830	1516	1160	0.13303	153	1.03607	0.58391
XLOC_004546	chr5	130355645	130364020	+	8375	chr18	60320642	60338669	+	18027	284	158	0.28507	105	0.18068	8.79949
XLOC_004548	chr5	130588732	130593138	+	4406	chr11	54609956	54615497	-	5541	2504	2063	0.09656	0	0.260593	10.9936
XLOC_004549	chr5	131520568	131523063	+	2495	chr11	53955466	53957225	-	1759	288	80	0.56522	0	1.40308	0.411755
XLOC_004554	chr5	133135103	133156483	+	21380	chr11	52378950	52403542	-	24592	932	995	0.03269	156	0.196023	0.319141
XLOC_004559	chr5	133842304	133844920	+	2616	chr11	51688268	51690423	-	2155	1045	658	0.22725	246	0.545264	0.107243
XLOC_004562	chr5	134601126	134603585	+	2459	chr13	56126946	56128003	+	1057	1385	265	0.67879	0	0.234549	0
XLOC_004565	chr5	135148255	135162271	+	14016	chr13	56526816	56532459	+	5643	1718	1416	0.09636	0	0.497669	0.08506
XLOC_004569	chr5	136070615	136090375	+	19760	chr13	57343152	57351634	+	8482	564	263	0.36397	108	0.167176	0.271097
XLOC_004573	chr5	139123576	139125847	+	2271	chr18	36076165	36078379	+	2214	1624	1622	0.00062	0	0.216957	0.065936
XLOC_004574	chr5	139138174	139139292	+	1118	chr18	36092374	36093415	+	1041	540	491	0.04753	0	0.241658	0.060346
XLOC_004577	chr5	139541537	139553608	+	12071	chr18	36497348	36507318	+	9970	7469	5591	0.1438	186	1.17752	0.2966
XLOC_004584	chr5	141543139	141548174	+	5035	chr18	38635823	38642478	+	6655	4758	4999	0.0247	0	0.785593	0.007131
XLOC_004585	chr5	141615465	141616011	+	546	chr18	38691610	38691817	+	207	403	134	0.50093	0	0.064762	0
XLOC_004593	chr5	144809430	144830662	+	21232	chr18	41661933	41690858	+	28925	1099	957	0.06907	159	1.85489	0.106126
XLOC_004595	chr5	145780543	145786922	+	6379	chr18	42607001	42611270	+	4269	312	290	0.03654	0	0	0.107588
XLOC_004598	chr5	148786251	148808237	+	21986	chr18	61809089	61825339	-	16250	13862	9793	0.17201	0	3.19916	0.017538
XLOC_004609	chr5	153476605	153537442	+	60837	chr11	57390717	57428255	+	37538	352	194	0.28938	0	4.85793	2.20511
XLOC_004611	chr5	154258473	154263999	+	5526						1464			0	4.56095
XLOC_004612	chr5	154496131	154499168	+	3037	chr11	48420461	48424830	-	4369	362	198	0.29286	0	0.19593	0.178196
XLOC_004616	chr5	157912249	157922781	+	10532	chr11	45037257	45053376	-	16119	645	654	0.00693	126	0.384406	0.898123
XLOC_004621	chr5	159003427	159012901	+	9474	chr11	43981756	43991680	-	9924	607	644	0.02958	102	0.214984	0.123369
XLOC_004625	chr5	163151151	163158626	+	7475	chr11	40251107	40255028	-	3921	402	19	0.90974	0	0.746616	1.85699
XLOC_004626	chr5	163897275	163978193	+	80918	chr11	39365551	39433734	-	68183	891	802	0.05257	246	0.366149	1.22271
XLOC_004628	chr5	169758396	169762104	+	3708	chr11	33907305	33910956	-	3651	2973	3123	0.02461	0	0.109475	0.034196
XLOC_004631	chr5	171906348	171935321	+	28973	chr11	32202763	32221055	-	18292	1093			135	0.423414
XLOC_004632	chr5	171960624	171963089	+	2465	chr17	26490708	26491995	+	1287	626	171	0.57089	0	0.687916	0
XLOC_004635	chr5	172199210	172209337	+	10127	chr17	26646363	26658370	+	12007	1450	1235	0.08007	126	0.377987	0.218911
XLOC_004636	chr5	172243601	172252561	+	8960	chr17	26682108	26688557	+	6449	1549	1869	0.09362	147	0.151641	0.072326
XLOC_004637	chr5	172700825	172708051	+	7226	chr17	27019609	27020573	+	964	382			0	0.30745
XLOC_004640	chr5	172812058	172898212	+	86154	chr11	31325698	31430817	+	105119	4659	1042	0.63445	0	0.412542	1.84539
XLOC_004641	chr5	172923686	172951116	+	27430	chr11	31462149	31483345	+	21196	1339	295	0.63892	99	0.29315	0.344281
XLOC_004642	chr5	173005972	173012074	+	6102	chr11	31546516	31549910	+	3394	3363	1175	0.48215	0	0.66812	0.06068
XLOC_004643	chr5	173128537	173135199	+	6662	chr11	31635552	31640441	+	4889	618	435	0.17379	171	1.79271	2.91996
XLOC_004644	chr5	173205285	173220885	+	15600	chr11	31694845	31707680	+	12835	771	704	0.04542	312	8.30541	11.1762
XLOC_004645	chr5	173664896	173670279	+	5383						999			0	0.287378
XLOC_004649	chr5	174045166	174052778	+	7612	chr13	53649951	53659137	-	9186	659	566	0.07592	180	0.112689	0.209067
XLOC_004651	chr5	174247029	174253327	+	6298						287			0	0.40922
XLOC_004657	chr5	176170144	176170860	+	716	chr13	54988661	54989362	+	701	575	563	0.01054	102	0.320714	0
XLOC_004670	chr5	177389361	177390144	+	783	chr6	146351686	146351835	+	149	697	65	0.8294	147	0.388392	1.18197
XLOC_004672	chr5	177661603	177662081	+	478	chr11	51396531	51397145	-	614	370	491	0.14053	0	3.98747	6.53918
XLOC_004673	chr5	177663413	177664575	+	1162	chr11	51394648	51395688	-	1040	1004	637	0.22364	0	2.42668	6.48052
XLOC_004677	chr5	179084762	179095672	+	10910						1469			0	0.433061
XLOC_004678	chr5	179719194	179722253	+	3059	chr11	49657800	49660123	-	2323	680	464	0.18881	0	6.35032	1.06939
XLOC_004679	chr5	179868558	179870238	+	1680	chr11	49556974	49557540	-	566	806	311	0.44315	0	0.416194	0.11345
XLOC_004682	chr5	180111765	180113546	+	1781						1039			0	0.489829
XLOC_004685	chr5	180296861	180298361	+	1500						508			0	0.69276
XLOC_004691	chr5	26321	37720	-	11399						382			90	0.409934
XLOC_004692	chr5	269972	271631	-	1659	chr13	74454817	74455880	+	1063	522	550	0.02612	0	3.39988	0.368665
XLOC_004695	chr5	654143	654462	-	319						205			0	0.817786
XLOC_004697	chr5	858993	860350	-	1357	chr13	74100345	74100744	+	399	1261	291	0.625	123	0.287941	0.10166
XLOC_004698	chr5	985229	997432	-	12203						5556			0	1.12485
XLOC_004699	chr5	1002177	1003982	-	1805	chr13	73988861	73989830	+	969	842	409	0.34612	207	0.216976	0
XLOC_004700	chr5	1040857	1048427	-	7570						6942			0	0.582371
XLOC_004706	chr5	1856083	1856682	-	599	chr13	73423800	73424148	+	348	493	300	0.24338	0	0.158818	0
XLOC_004708	chr5	1963722	1967268	-	3546	chr13	73343692	73345651	+	1959	490	393	0.10985	162	0.183262	0
XLOC_004709	chr5	2303865	2312419	-	8554						516			120	0.101159
XLOC_004712	chr5	3417266	3536208	-	118942	chr13	72151204	72243343	+	92139	3265	572	0.70185	0	0.447642	0.252111
XLOC_004717	chr5	4974802	5034380	-	59578	chr13	71027528	71052813	+	25285	627	296	0.35861	165	0.083251	1.90718
XLOC_004724	chr5	6359188	6362527	-	3339	chr13	69960817	69963397	+	2580	231	195	0.08451	0	0.291549	0
XLOC_004727	chr5	7363062	7373626	-	10564	chr13	69160580	69167327	+	6747	1302	730	0.2815	99	0.440999	0.048835
XLOC_004730	chr5	9621488	9623718	-	2230	chr15	32114354	32115947	+	1593	389	191	0.34138	0	0.134186	0
XLOC_004734	chr5	10493402	10502840	-	9438						2315	651	0.56102	96	0.110549
XLOC_004735	chr5	10775169	10777174	-	2005	chr15	31124093	31125265	-	1172	342			0	0.305253
XLOC_004737	chr5	12837289	12862122	-	24833	chr15	29105712	29112097	+	6385	231			0	1.69475
XLOC_004738	chr5	12914179	13032998	-	118819	chr15	28998483	29044620	+	46137	270			0	0.848085
XLOC_004743	chr5	16373469	16440190	-	66721	chr15	25939211	26010919	+	71708	2309	2169	0.03126	108	0.339999	0.270803
XLOC_004746	chr5	17378025	17387419	-	9394	chr15	25207958	25215644	+	7686	3065	1528	0.33464	108	0.246941	0.168606
XLOC_004751	chr5	21138914	21172730	-	33816	chr15	22019477	22036219	+	16742	317	88	0.56543	0	0.864482	2.81929
XLOC_004752	chr5	21323944	21341484	-	17540	chr15	21864943	21871630	+	6687	5491	6687	0.09821	123	0.023616	0.005276
XLOC_004754	chr5	24352417	24353552	-	1135						487			0	0.053592
XLOC_004755	chr5	24835388	24840692	-	5304	chr15	18537625	18539614	+	1989	2314	469	0.66295	0	0.152264	0.144112
XLOC_004759	chr5	26382627	26399928	-	17301	chr15	17286122	17301645	+	15523	487	213	0.39143	153	0.143983	1.1111
XLOC_004761	chr5	27406638	27436518	-	29880	chr15	16295350	16337855	+	42505	1294	175	0.76174	0	0.45381	4.2718
XLOC_004762	chr5	28286495	28287772	-	1277						523			0	0.199611
XLOC_004764	chr5	29141836	29143508	-	1672						733			0	0.569694
XLOC_004765	chr5	29355911	29396100	-	40189						925	875	0.02778	0	2.62402
XLOC_004767	chr5	31175317	31176072	-	755	chr15	13120683	13121445	+	762	346	333	0.01915	0	0.217077	0.103985
XLOC_004787	chr5	37071722	37072811	-	1089	chr15	8233803	8234904	+	1101	736	635	0.07367	0	0.292817	0.218123
XLOC_004788	chr5	37899464	37920971	-	21507	chr15	7668687	7686760	+	18073	540	23	0.91829	0	0.821639	4.41578
XLOC_004789	chr5	37939466	37948057	-	8591	chr15	7637925	7646640	+	8715	442	901	0.34177	114	0.031728	0.158265
XLOC_004794	chr5	38710468	38720375	-	9907	chr15	6942143	6952508	+	10365	800	703	0.06454	0	0.368814	0.196063
XLOC_004799	chr5	41284856	41295239	-	10383	chr15	4552031	4573552	+	21521	1984	246	0.77937	177	0.973455	11.2776
XLOC_004800	chr5	42153042	42175444	-	22402	chr15	3675182	3699917	+	24735	4320	902	0.65454	0	12.7774	0.236796
XLOC_004801	chr5	42318255	42374527	-	56272	chr15	3561212	3609912	+	48700	234	200	0.07834	0	1.19863	475.776
XLOC_004803	chr5	42985139	42993435	-	8296						3120			0	3.76746
XLOC_004804	chr5	43012799	43019703	-	6904						4969			117	0.911964
XLOC_004805	chr5	43066161	43067888	-	1727						1587			0	0.972367
XLOC_004813	chr5	50154593	50155854	-	1261	chr13	117617274	117618407	+	1133	794	723	0.0468	0	0.07065	0.049307
XLOC_004815	chr5	50261452	50266021	-	4569	chr13	117494270	117498741	+	4471	1085	1112	0.01229	189	0.091259	0.024239
XLOC_004822	chr5	53955987	53999188	-	43201	chr13	114244654	114289145	+	44491	614	407	0.20274	141	0.433967	11.0482
XLOC_004823	chr5	54317121	54319997	-	2876	chr13	113971551	113973897	+	2346	809	529	0.20927	0	0.352642	0.152859
XLOC_004827	chr5	54913806	54916463	-	2657	chr13	113526437	113528366	+	1929	933	754	0.10611	102	0.265316	0.131063
XLOC_004829	chr5	55744361	55777773	-	33412	chr13	112890268	112918976	+	28708	3762	2337	0.23364	0	1.03621	0.173835
XLOC_004830	chr5	55807129	55828960	-	21831	chr13	112847245	112866023	+	18778	782	686	0.0654	159	0.964574	0.934067
XLOC_004831	chr5	55828976	55832351	-	3375	chr13	112842977	112845621	+	2644	466	432	0.03786	0	0.265601	0.076251
XLOC_004832	chr5	55832409	55841007	-	8598	chr13	112838775	112842854	+	4079	1089	262	0.61214	0	0.27388	0
XLOC_004837	chr5	57403458	57418168	-	14710	chr13	111440297	111461204	+	20907	1213	1668	0.15793	96	0.150613	0.147903
XLOC_004839	chr5	59798345	59822213	-	23868	chr13	109251034	109276239	+	25205	4480	4005	0.05598	0	2.14423	0.361892
XLOC_004841	chr5	60617325	60627805	-	10480	chr13	108680537	108692288	+	11751	773	1264	0.24104	0	1.0129	0.126735
XLOC_004842	chr5	60920228	60923894	-	3666	chr13	108433754	108437025	+	3271	1266	1166	0.04112	132	0.317533	0.110666
XLOC_004844	chr5	61028616	61031526	-	2910	chr13	108333076	108336175	+	3099	1519	1548	0.00946	132	0.996543	0
XLOC_004846	chr5	63179305	63183220	-	3915	chr13	106319567	106329598	-	10031	289	147	0.32569	0	0.270925	0.480039
XLOC_004847	chr5	64782270	64782875	-	605						365			0	0.316623
XLOC_004848	chr5	65220459	65221176	-	717	chr13	104711521	104712224	+	703	505	494	0.01101	0	0.562861	0.753305
XLOC_004849	chr5	65500951	65505274	-	4323	chr13	104500412	104515101	+	14689	1649	1221	0.14913	0	0.150359	0.083033
XLOC_004850	chr5	65643589	65736315	-	92726	chr13	104286831	104380913	+	94082	2391	577	0.61119	0	11.7847	1.75832
XLOC_004851	chr5	65803371	65807715	-	4344	chr13	104224385	104227318	+	2933	944	885	0.03226	0	0.26265	0.039868
XLOC_004856	chr5	67482631	67485177	-	2546	chr13	102570223	102572278	+	2055	939	640	0.18936	0	0.041692	0.055129
XLOC_004859	chr5	67804064	67861330	-	57266	chr13	102177344	102233657	+	56313	1057	650	0.23843	165	1.29631	1.01563
XLOC_004860	chr5	68263567	68325992	-	62425	chr13	101642728	101707438	+	64710	3019	1234	0.4197	0	0.636646	4.56989
XLOC_004861	chr5	68334344	68339648	-	5304	chr13	101623493	101634914	+	11421	438	470	0.03524	141	1.82327	0.908893
XLOC_004864	chr5	68477524	68484948	-	7424						436	107	0.60589	150	6.954
XLOC_004872	chr5	71393373	71395047	-	1674	chr13	100296021	100297963	+	1942	1354	1619	0.08914	0	0.472251	0.020874
XLOC_004874	chr5	71817326	71956514	-	139188	chr13	99815044	99935273	+	120229	858	730	0.0806	141	1.74931	1.94481
XLOC_004875	chr5	71957505	71986512	-	29007	chr13	99790077	99813759	+	23682	453	375	0.0942	0	0.66256	12.5581
XLOC_004877	chr5	72066457	72067544	-	1087						339			165	1.38579
XLOC_004878	chr5	72236630	72251181	-	14551	chr13	99585703	99599143	+	13440	588	359	0.24182	0	1.5979	1.69743
XLOC_004879	chr5	72408840	72413568	-	4728	chr13	99467575	99471651	+	4076	3417	3005	0.06415	0	0.372354	0.019052
XLOC_004881	chr5	72542336	72570767	-	28431	chr13	99308863	99331755	+	22892	409	390	0.02378	0	0.658976	2.87525
XLOC_004882	chr5	72750011	72768721	-	18710	chr13	99105341	99118760	+	13419	440	252	0.27168	0	0.14829	0.961864
XLOC_004885	chr5	73568705	73617160	-	48455	chr13	98309274	98349943	+	40669	658	453	0.18452	0	0.257818	1.76813
XLOC_004888	chr5	73665200	73832801	-	167601	chr13	98111746	98270616	+	158870	568	474	0.09021	0	0.649334	25.182
XLOC_004890	chr5	74343543	74348668	-	5125	chr13	97695252	97698974	+	3722	794	306	0.44364	0	1.02892	0.110439
XLOC_004896	chr5	77638188	77656217	-	18029	chr13	95055477	95068729	+	13252	1674	1202	0.16412	0	3.09682	1.72576
XLOC_004900	chr5	78623522	78631046	-	7524	chr13	94193120	94199350	+	6230	290			0	0.840475
XLOC_004901	chr5	78654496	78663947	-	9451	chr13	94181401	94186991	+	5590	1187	752	0.22434	0	1.18638	0.568058
XLOC_004905	chr5	79904441	79918343	-	13902	chr13	93165460	93169655	+	4195	440	36	0.84874	0	1.2251	0.856607
XLOC_004907	chr5	80243529	80256189	-	12660	chr13	92901777	92920628	+	18851	1329	235	0.69949	0	0.854309	1.94482
XLOC_004908	chr5	82146851	82155888	-	9037	chr13	90432662	90442920	+	10258	548	446	0.10262	93	0.155148	0.478901
XLOC_004909	chr5	82215194	82216938	-	1744	chr13	90377785	90379995	-	2210	745	527	0.17138	0	0	0
XLOC_004913	chr5	86361560	86370138	-	8578	chr13	85650268	85654668	+	4400	330			0	0.514073
XLOC_004918	chr5	87988461	87989789	-	1328	chr13	83852374	83853487	+	1113	676	525	0.12573	96	0.347196	0.679033
XLOC_004919	chr5	88240172	88259771	-	19599	chr13	83575924	83598870	+	22946	394	391	0.00382	0	3.22336	2.92249
XLOC_004923	chr5	90538752	90560495	-	21743	chr13	81112738	81129674	+	16936	274	205	0.14405	0	1.41628	0.403411
XLOC_004924	chr5	90597873	90610232	-	12359	chr13	81075978	81088337	+	12359	11246	9838	0.06678	0	0.776309	0.023453
XLOC_004926	chr5	92005456	92007287	-	1831	chr13	79441493	79441927	+	434	244			90	0.423017
XLOC_004928	chr5	92242886	92275298	-	32412	chr13	79125980	79170717	+	44737	707	504	0.16763	0	0.203034	1.69758
XLOC_004929	chr5	92355368	92404375	-	49007	chr13	78987798	79029227	+	41429	625	501	0.11012	0	0.237638	0.690075
XLOC_004933	chr5	95549049	95550779	-	1730	chr13	75512208	75512661	+	453	652	214	0.50577	0	4.41125	0.329746
XLOC_004935	chr5	97421963	97496897	-	74934	chr17	16450475	16515547	+	65072	651	25	0.92604	0	0.130601	858.526
XLOC_004937	chr5	99715208	99723958	-	8750	chr5	130473721	130475421	-	1700	701	676	0.01816	0	0.173779	0.450723
XLOC_004942	chr5	102580708	102589507	-	8799						815	224	0.56882	105	0.304223
XLOC_004945	chr5	103216168	103227087	-	10919	chr17	59489327	59502009	-	12682	1747	1501	0.07574	0	1.34347	0.061635
XLOC_004950	chr5	105539002	105541178	-	2176	chr17	61560240	61561257	-	1017	728			0	0.663233
XLOC_004951	chr5	106150897	106346937	-	196040	chr17	62112989	62525348	-	412359	1054	886	0.0866	0	1.06476	6.59025
XLOC_004961	chr5	115703286	115710267	-	6981	chr18	47316813	47324627	-	7814	3084	4482	0.18477	117	0.124191	0.049204
XLOC_004964	chr5	116256538	116260291	-	3753	chr18	47860941	47864663	-	3722	1119	587	0.31184	114	0.023324	0.049134
XLOC_004965	chr5	117803850	117897818	-	93968	chr18	49486616	49602899	-	116283	4344	5600	0.12631	0	1.25345	0.107109
XLOC_004979	chr5	123676149	123676863	-	714	chr18	54770362	54771034	-	672	295	266	0.05169	0	0.113658	0
XLOC_004982	chr5	124204486	124211743	-	7257	chr18	55255021	55262960	-	7939	1129	1195	0.0284	0	0.381431	0.44748
XLOC_004983	chr5	124329348	124331780	-	2432	chr18	55354189	55356058	-	1869	387	430	0.05263	0	0.505797	1.36598
XLOC_004984	chr5	125412492	125621141	-	208649	chr18	56254147	56448024	-	193877	1339	968	0.16081	180	1.71525	2.09918
XLOC_004985	chr5	125469756	125470759	-	1003						253			0	0
XLOC_004988	chr5	126554725	126565505	-	10780	chr18	57237702	57245454	-	7752	1027	1116	0.04153	123	0.988471	0.136509
XLOC_004991	chr5	127018667	127038662	-	19995	chr18	57656225	57693141	-	36916	557	504	0.04995	0	0.445137	2.90004
XLOC_004998	chr5	131514926	131516821	-	1895	chr11	53959402	53960725	+	1323	381			0	0.171254
XLOC_005008	chr5	133764741	133796306	-	31565	chr11	51734978	51767060	+	32082	700	27	0.92572	93	3.44187	28.749
XLOC_005009	chr5	134374527	134375737	-	1210	chr13	55936717	55937785	-	1068	836	807	0.01765	0	2.79815	0.043721
XLOC_005010	chr5	134460069	134466939	-	6870	chr13	56011385	56017461	-	6076	541	390	0.16219	0	0.313575	0.260418
XLOC_005011	chr5	134571924	134583867	-	11943	chr13	56098339	56109240	-	10901	2159	1903	0.06302	162	0.025077	0.168358
XLOC_005012	chr5	135235957	135240982	-	5025	chr13	56589193	56590634	-	1441	283	174	0.23851	0	0.691673	0.179313
XLOC_005020	chr5	139120561	139125808	-	5247	chr18	36073367	36078339	-	4972	784	642	0.09958	0	1.04862	0.770063
XLOC_005026	chr5	140088280	140091097	-	2817	chr18	36960935	36961776	-	841	884	447	0.32832	156	0.369049	37.9665
XLOC_005028	chr5	140441996	140457585	-	15589						353	261	0.14984	0	1.3678
XLOC_005034	chr5	141202479	141204895	-	2416	chr18	38314529	38317965	-	3436	1038	1761	0.25831	150	0.403772	0.01919
XLOC_005041	chr5	144818650	144869293	-	50643	chr18	41681678	41736870	-	55192	3611	2594	0.1639	0	1.48561	0.186541
XLOC_005046	chr5	146556613	146559486	-	2873	chr18	43321282	43334356	-	13074	452	424	0.03196	249	0.255748	33.4901
XLOC_005047	chr5	146559766	146614422	-	54656	chr18	43334641	43367215	-	32574	885	517	0.26248	0	1.13203	0.588296
XLOC_005049	chr5	147729740	147763363	-	33623	chr18	62708534	62741776	+	33242	478	266	0.28495	0	1.06617	1.90908
XLOC_005050	chr5	149016982	149020628	-	3646	chr18	61646472	61648730	+	2258	1355	456	0.49641	0	0.841034	0.259911
XLOC_005051	chr5	149719782	149720699	-	917	chr18	61028720	61029218	+	498	800	381	0.35478	0	0.032624	0
XLOC_005052	chr5	149855078	149865586	-	10508	chr18	60908137	60912992	+	4855	438	148	0.49488	0	0.878651	3.57596
XLOC_005063	chr5	157929676	157942094	-	12418	chr11	45020062	45029030	+	8968	491	383	0.12357	0	1.06782	1.2353
XLOC_005064	chr5	158875563	158893301	-	17738	chr11	44113337	44141047	+	27710	2029	2034	0.00123	0	0.173651	0.078757
XLOC_005066	chr5	160358787	160365633	-	6846						2320	273	0.78943	108	0.06967
XLOC_005067	chr5	161336737	161428237	-	91500	chr11	41863011	41940637	+	77626	1304	1073	0.09718	90	0.874229	2.26889
XLOC_005070	chr5	163875250	163896926	-	21676	chr11	39434082	39462167	+	28085	1250	1314	0.02496	0	1.39891	0.143592
XLOC_005071	chr5	164662758	164668941	-	6183	chr11	38697571	38703795	+	6224	539	369	0.18722	126	0.508424	0.156323
XLOC_005072	chr5	166331943	166334981	-	3038	chr11	37119599	37123200	+	3601	406	425	0.02286	0	0.224992	0.159032
XLOC_005077	chr5	169615273	169626145	-	10872	chr11	34036962	34046695	+	9733	6743	6125	0.04803	0	1.83976	0.033163
XLOC_005079	chr5	170171868	170174581	-	2713	chr11	33512178	33514230	+	2052	1960	1119	0.27314	0	0.834786	1.7329
XLOC_005081	chr5	171150034	171164435	-	14401	chr11	32769067	32785778	+	16711	4225	5087	0.09257	0	0.292034	0.163367
XLOC_005085	chr5	172663703	172671727	-	8024	chr17	26979721	26987337	-	7616	4425	4186	0.02776	165	0.354604	0.073415
XLOC_005087	chr5	173133321	173155306	-	21985	chr11	31639793	31649358	-	9565	3660	2251	0.23837	0	1.481	0.02256
XLOC_005088	chr5	173213541	173217981	-	4440	chr11	31701780	31705727	-	3947	2360	1944	0.09665	111	3.25371	0.208607
XLOC_005099	chr5	177387461	177392855	-	5394	chr6	146350586	146351835	-	1249	4862	753	0.73179	0	0.272825	0
XLOC_005101	chr5	177479412	177479818	-	406	chr18	67973442	67974105	-	663	291	406	0.16499	0	0.807189	7.56492
XLOC_005102	chr5	178121720	178134039	-	12319	chr11	51046901	51048405	+	1504	835	646	0.12762	471	0.390705	0
XLOC_005105	chr5	178804600	178805760	-	1160	chr11	50378648	50378804	+	156	553	156	0.55994	96	0.256243	0
XLOC_005110	chr5	180253815	180259101	-	5286						3666			0	5.25394
XLOC_005111	chr5	180261302	180262712	-	1410						953			0	14.2456
XLOC_005113	chr5	180618045	180618852	-	807						411			117	0.571513
XLOC_005115	chr5	180634461	180644800	-	10339	chr11	48638234	48644771	+	6537	538			0	0.53516
XLOC_005117	chr6	183913	187741	+	3828	chr13	30653755	30657086	+	3331	3599	2508	0.17865	354	0.833806	0
XLOC_005121	chr6	693956	713766	+	19810	chr13	31067008	31079859	+	12851	387	64	0.71619	0	6.57146	8.56885
XLOC_005123	chr6	1489677	1490173	+	496	chr13	31779253	31779517	+	264	306	165	0.29936	0	0.255874	0
XLOC_005125	chr6	1605723	1607305	+	1582	chr13	31894172	31895760	+	1588	1366	1335	0.01148	303	0.562054	0.044389
XLOC_005126	chr6	2245995	2329986	+	83991	chr13	32430669	32479117	+	48448	3075	1673	0.29528	0	3.96728	0.137768
XLOC_005127	chr6	2391779	2484261	+	92482	chr13	32536044	32611509	+	75465	11195	9353	0.08964	111	0.361526	0.443573
XLOC_005128	chr6	2637169	2640623	+	3454	chr13	32775421	32776097	+	676	1222	676	0.28767	0	0.448512	0
XLOC_005129	chr6	2917127	2941664	+	24537						767	223	0.54949	0	0.629509
XLOC_005131	chr6	3026410	3027751	+	1341	chr13	34079003	34081782	+	2779	1268	2365	0.30195	0	1.2641	0.313294
XLOC_005132	chr6	3056123	3056995	+	872						398			0	0.622969
XLOC_005133	chr6	3254644	3258407	+	3763						1603	201	0.77716	0	0.415176
XLOC_005137	chr6	3893359	3894524	+	1165	chr13	34892206	34892561	+	355	441	265	0.24929	0	0.295908	0
XLOC_005140	chr6	4466644	4467252	+	608	chr13	35455057	35455370	+	313	406	198	0.34437	0	0.066677	0.152078
XLOC_005142	chr6	4610845	4612152	+	1307	chr13	35597245	35598435	+	1190	1142	1037	0.04819	0	0.049121	0
XLOC_005143	chr6	5030205	5044060	+	13855						1737			306	2.93997
XLOC_005144	chr6	5851738	5870453	+	18715	chr13	36670598	36685685	+	15087	412	95	0.62525	120	0.895198	0.371398
XLOC_005150	chr6	6759608	6760176	+	568	chr13	37606290	37606793	+	503	263	256	0.01349	111	0.496181	0
XLOC_005151	chr6	6891669	6899654	+	7985	chr13	37719464	37725758	+	6294	1226	701	0.27244	0	0.481793	0.761733
XLOC_005152	chr6	6901254	6918948	+	17694	chr13	37730077	37752547	+	22470	933	1498	0.23241	0	0.316548	3.27942
XLOC_005153	chr6	6993423	6995787	+	2364	chr13	37820440	37822149	+	1709	517	498	0.01872	0	0.227168	0.129555
XLOC_005155	chr6	7427115	7453025	+	25910	chr13	38157060	38176228	+	19168	764	107	0.75431	306	3.10866	2.91256
XLOC_005158	chr6	8284310	8307763	+	23453	chr13	38913013	38929803	+	16790	523			0	0.172685
XLOC_005160	chr6	8906331	8931375	+	25044	chr13	39462269	39487100	+	24831	5612	6193	0.04922	0	0.754242	0.051733
XLOC_005163	chr6	8790347	8792491	+	2144						634			144	0.581738
XLOC_005164	chr6	8931542	8941204	+	9662	chr13	39487490	39496564	+	9074	4274	5921	0.16155	0	1.43793	0.011696
XLOC_005165	chr6	8984904	9046711	+	61807	chr13	39534924	39561808	+	26884	740			0	1.85167
XLOC_005167	chr6	10434548	10457014	+	22466						860	71	0.84748	0	0.318652
XLOC_005171	chr6	11810834	11811481	+	647	chr13	41945925	41946549	+	624	554	554	0	102	0.046312	0
XLOC_005172	chr6	11909098	11920977	+	11879	chr13	42038166	42046188	+	8022	459	277	0.24728	0	0.341165	0.875053
XLOC_005173	chr6	11934222	11961218	+	26996	chr13	42063426	42105038	+	41612	998	197	0.67029	0	1.08751	4.80325
XLOC_005174	chr6	12002390	12008853	+	6463	chr13	42139843	42144447	+	4604	458	436	0.02461	0	0.829404	2.55783
XLOC_005175	chr6	12322519	12335036	+	12517	chr13	42422245	42433723	+	11478	438	240	0.29204	120	0.119174	0.128491
XLOC_005176	chr6	13328899	13330028	+	1129						303			0	0.775221
XLOC_005178	chr6	14005150	14007132	+	1982	chr13	43783182	43786202	+	3020	386	484	0.11264	0	0.270457	0.220966
XLOC_005180	chr6	14431957	14463629	+	31672	chr13	44148289	44169259	+	20970	834	224	0.57656	0	1.94577	2.04033
XLOC_005181	chr6	14474803	14512461	+	37658	chr13	44178339	44199011	+	20672	1449	609	0.40816	141	1.0829	0.332949
XLOC_005182	chr6	14513057	14514697	+	1640	chr13	44199185	44201188	+	2003	1536	1913	0.10931	0	0.377988	0.015489
XLOC_005183	chr6	14661559	14665451	+	3892	chr13	44347965	44349379	+	1414	692	167	0.61118	168	0.509159	0.193169
XLOC_005184	chr6	15995174	16000028	+	4854	chr13	45369883	45375121	+	5238	845	705	0.09032	180	0	0.037565
XLOC_005192	chr6	19538727	19539166	+	439	chr13	48113375	48114010	+	635	300	289	0.01868	0	0.315827	0.122086
XLOC_005194	chr6	20321340	20333471	+	12131	chr13	30139443	30151264	-	11821	2001	710	0.47621	144	0.626066	0.292623
XLOC_005198	chr6	22349446	22517940	+	168494	chr13	26954475	27099200	-	144725	394	27	0.87173	0	0.893546	17.7992
XLOC_005202	chr6	23399153	23404502	+	5349	chr13	26063578	26069430	-	5852	791	488	0.2369	0	0.461931	0.118203
XLOC_005205	chr6	24796944	24798091	+	1147	chr13	24837901	24838483	-	582	1031	526	0.32434	0	2.32892	0.096543
XLOC_005208	chr6	25992926	26002137	+	9211						4533			105	0.862949
XLOC_005210	chr6	26474533	26477465	+	2932	chr13	23551674	23557234	-	5560	1207	5560	0.64327	0	1.5256	2.88981
XLOC_005212	chr6	26569551	26574925	+	5374	chr13	23521142	23524519	-	3377	2883	1952	0.19255	0	0.339479	0.118076
XLOC_005214	chr6	26673487	26688063	+	14576						2356			0	1.49192
XLOC_005216	chr6	26924878	26936850	+	11972						203			102	2.53021
XLOC_005219	chr6	27661813	27676935	+	15122						3094			102	0.207309
XLOC_005220	chr6	27677988	27680876	+	2888						319			120	0.853668
XLOC_005221	chr6	27725274	27731046	+	5772						2126			0	0.555058
XLOC_005225	chr6	28864306	28865099	+	793	chr13	21291680	21291769	-	89	413	89	0.64542	0	0.505552	0
XLOC_005229	chr6	29163279	29168401	+	5122						527			108	1.80762
XLOC_005238	chr6	30259313	30271912	+	12599						956	153	0.72408	0	14.1031
XLOC_005239	chr6	30484042	30488506	+	4464						951			105	0.46127
XLOC_005242	chr6	30997688	31002485	+	4797	chr17	35755479	35757287	-	1808	612	575	0.03117	429	0.106614	0
XLOC_005243	chr6	31021983	31027653	+	5670						5670			99	0.180131
XLOC_005244	chr6	31165536	31196425	+	30889						2985	302	0.81625	90	1.44664
XLOC_005252	chr6	31789990	31795104	+	5114	chr17	35096627	35099829	-	3202	213	99	0.36538	0	1.97521	3.49769
XLOC_005254	chr6	32360319	32361247	+	928	chr13	23550722	23551251	+	529	837	482	0.26914	0	0.423696	0.124943
XLOC_005258	chr6	32685781	32686612	+	831						445			186	3.92953
XLOC_005263	chr6	33857866	33896060	+	38194	chr17	27461443	27499675	+	38232	15211	9972	0.20804	0	1.2697	0.357661
XLOC_005264	chr6	34203397	34204471	+	1074	chr17	27692485	27693405	+	920	800	707	0.06171	0	0.163119	0.359133
XLOC_005275	chr6	36686283	36690080	+	3797	chr17	29273225	29277065	+	3840	1423	1282	0.05213	0	0.659773	218.675
XLOC_005278	chr6	37484563	37509148	+	24585	chr17	29868350	29888883	+	20533	6115	5879	0.01968	168	0.853646	0.018005
XLOC_005279	chr6	37517779	37518636	+	857	chr17	29892667	29893496	+	829	442	395	0.05615	210	0.064187	0.081669
XLOC_005280	chr6	38622107	38631831	+	9724	chr17	30722368	30724671	+	2303	679	152	0.63418	0	1.01171	2.53413
XLOC_005281	chr6	38681826	38682993	+	1167	chr17	30763499	30763773	+	274	400	190	0.35593	0	0.163119	0.364496
XLOC_005283	chr6	39916123	39920971	+	4848	chr17	49555830	49562274	-	6444	304			0	0.221539
XLOC_005284	chr6	40132650	40139354	+	6704	chr17	49442544	49448334	-	5790	623	109	0.70219	0	0.272302	0.620079
XLOC_005285	chr6	40302692	40347631	+	44939	chr17	49251582	49315307	-	63725	1729	1531	0.06074	120	6.86819	4.26056
XLOC_005289	chr6	42420212	42423732	+	3520	chr17	47273771	47277554	-	3783	354	387	0.04453	0	0.535301	0.349295
XLOC_005290	chr6	42423792	42424759	+	967	chr17	47273584	47273712	-	128	386	97	0.59834	0	0.200549	0
XLOC_005295	chr6	43858764	43905943	+	47179	chr17	46002130	46045392	-	43262	2281	2210	0.01581	0	0.332304	0.271406
XLOC_005302	chr6	45540497	45545853	+	5356	chr17	44714686	44719755	-	5069	4792	4556	0.02525	0	0.435711	0
XLOC_005303	chr6	45633187	45634483	+	1296	chr17	44631617	44632367	-	750	597	190	0.51715	0	0.203059	0
XLOC_005306	chr6	46459788	46500495	+	40707	chr17	43891627	43938140	-	46513	622	84	0.76204	0	0.539055	7.56061
XLOC_005309	chr6	47277790	47280162	+	2372	chr17	43150748	43153382	-	2634	383	113	0.54435	0	0.306403	0.312237
XLOC_005315	chr6	50061423	50066995	+	5572	chr1	18298040	18304229	+	6189	692	686	0.00435	0	1.01216	0.050477
XLOC_005323	chr6	52529198	52533951	+	4753						3784	1149	0.53416	114	1.40505
XLOC_005327	chr6	53493177	53496192	+	3015	chr9	77537572	77543883	-	6311	566	3157	0.69594	240	0.371747	0.024336
XLOC_005329	chr6	53863687	53871950	+	8263	chr9	77204264	77213557	-	9293	643	540	0.08707	0	0.38318	0
XLOC_005332	chr6	58182219	58187271	+	5052						1209			0	1.16479
XLOC_005339	chr6	68750265	68819883	+	69618	chr1	26483137	26602477	-	119340	973	353	0.46757	102	0.64376	3.93296
XLOC_005340	chr6	68765242	68770394	+	5152	chr1	26585702	26587392	-	1690	492	355	0.16175	0	0	0
XLOC_005341	chr6	71104589	71109120	+	4531	chr1	24114588	24123243	-	8655	401	200	0.33444	0	1.14202	1.23351
XLOC_005355	chr6	77484703	77698599	+	213896	chr9	80907246	81097592	+	190346	1211	469	0.44167	0	3.81465	8.43724
XLOC_005361	chr6	80247284	80259817	+	12533	chr9	83334845	83343832	+	8987	909	236	0.58777	0	2.38248	0.878852
XLOC_005365	chr6	81128030	81175644	+	47614	chr9	84068204	84096940	+	28736	1187	1036	0.06793	105	1.40495	0.066848
XLOC_005371	chr6	84692247	84717042	+	24795	chr9	86978724	87014465	+	35741	1239	671	0.29738	108	0.961718	0.138147
XLOC_005372	chr6	84732773	84734272	+	1499	chr9	87027761	87028688	+	927	340	321	0.02874	0	0.197231	0
XLOC_005375	chr6	88717725	88729647	+	11922	chr4	34189001	34200668	-	11667	228	359	0.22317	0	0.531694	0.196562
XLOC_005376	chr6	89673582	89675075	+	1493	chr4	33396756	33397089	-	333	366	246	0.19608	0	0.213927	0
XLOC_005384	chr6	91054937	91072351	+	17414	chr4	32276082	32287451	-	11369	1431	668	0.36351	240	0.187445	0.673881
XLOC_005389	chr6	93689707	93695847	+	6140	chr4	29157339	29165715	-	8376	314	316	0.00317	0	0	0.321402
XLOC_005392	chr6	94416800	94486199	+	69399	chr4	28238524	28320382	-	81858	9300	2847	0.53124	0	0.130351	0.13129
XLOC_005397	chr6	98264472	98446788	+	182316	chr4	23586708	23757328	-	170620	652	466	0.16637	0	1.85131	19.3071
XLOC_005405	chr6	101410580	101411032	+	452						345			0	0.406492
XLOC_005406	chr6	103982911	103988696	+	5785	chr10	46899286	46902396	-	3110	560			135	0.559267
XLOC_005409	chr6	105851187	105927108	+	75921	chr10	44727037	44786811	-	59774	1314	561	0.4016	0	1.10999	5.84903
XLOC_005413	chr6	107143409	107147869	+	4460	chr10	43538238	43545120	-	6882	765	518	0.19252	132	0.305121	0.171602
XLOC_005414	chr6	107150736	107167451	+	16715	chr10	43504020	43535024	-	31004	3875	10902	0.47554	186	1.39388	0.037198
XLOC_005417	chr6	108444718	108479222	+	34504	chr10	42311446	42348735	-	37289	2078	2390	0.06983	132	0.225895	0.622155
XLOC_005421	chr6	109072856	109091145	+	18289	chr10	41807976	41827278	-	19302	3311	1919	0.26616	147	0.127982	0.285777
XLOC_005426	chr6	111598891	111619807	+	20916						1246	673	0.29859	0	4.55112
XLOC_005429	chr6	112194866	112197726	+	2860	chr10	39087615	39089373	-	1758	219	189	0.07353	0	0.535855	0.152601
XLOC_005435	chr6	113201573	113204294	+	2721	chr10	37855792	37859655	-	3863	519	532	0.01237	0	0.27658	0.536079
XLOC_005436	chr6	113505722	113518840	+	13118	chr10	37507800	37521780	-	13980	367	359	0.01102	0	0.924492	0.743698
XLOC_005437	chr6	113852319	113864995	+	12676	chr10	37126844	37132443	-	5599	597	412	0.18335	0	0	0.086527
XLOC_005438	chr6	114225550	114242806	+	17256	chr10	36767013	36797647	-	30634	2040	1709	0.08829	114	0.12649	0.061936
XLOC_005441	chr6	114736743	114777802	+	41059	chr10	36090056	36134004	-	43948	1045	884	0.08346	96	0.770049	24.2044
XLOC_005442	chr6	115319521	115323156	+	3635						465			0	0.505144
XLOC_005443	chr6	115793683	115807570	+	13887	chr10	34989948	35007042	+	17094	645	101	0.72922	129	0.129958	54.512
XLOC_005448	chr6	119671081	119738843	+	67762	chr10	53795699	53818863	+	23164	221	57	0.58993	0	8.41087	9.79993
XLOC_005449	chr6	119855040	120010205	+	155165	chr10	53974968	54191154	+	216186	380	333	0.06592	0	4.96248	5.7679
XLOC_005450	chr6	120200453	120201751	+	1298	chr10	54458214	54459383	+	1169	238	203	0.07937	0	0.565949	0.175612
XLOC_005451	chr6	122007929	122017769	+	9840	chr10	56353050	56364184	+	11134	313	109	0.48341	0	1.16737	508.195
XLOC_005452	chr6	122238491	122283567	+	45076	chr10	56626131	56663666	+	37535	1438	681	0.35724	141	0.654139	0.470462
XLOC_005455	chr6	123427048	123433459	+	6411						450			0	0.399492
XLOC_005458	chr6	126380719	126400068	+	19349	chr10	30190328	30238142	-	47814	2191	20549	0.8073	0	0.569744	0.048666
XLOC_005459	chr6	126498338	126523385	+	25047	chr10	30067566	30100890	-	33324	583	122	0.6539	96	1.27623	9.21436
XLOC_005460	chr6	127195165	127198827	+	3662						382			102	0.273289
XLOC_005461	chr6	128969665	129015458	+	45793	chr10	27529814	27636332	-	106518	802	661	0.09638	0	0.735783	1.80157
XLOC_005464	chr6	132406223	132420419	+	14196	chr10	24193820	24199090	-	5270	746	419	0.28069	0	0.58069	0.084207
XLOC_005465	chr6	132448668	132490502	+	41834	chr10	24126765	24168766	-	42001	4541	2746	0.24633	0	0.523017	0.075531
XLOC_005466	chr6	133409218	133427719	+	18501	chr10	23211077	23231778	-	20701	2646	1933	0.15571	0	0.458658	0.069931
XLOC_005467	chr6	134142284	134175130	+	32846	chr10	22564250	22595068	-	30818	3556	2660	0.14414	333	0.278899	0.281039
XLOC_005470	chr6	135376170	135381688	+	5518	chr10	21007601	21015643	-	8042	790	495	0.22957	99	0.445998	0.315156
XLOC_005475	chr6	137736805	137739549	+	2744	chr10	19130688	19133032	-	2344	398	330	0.09341	0	0.262303	0.161811
XLOC_005476	chr6	137742183	137751988	+	9805	chr10	19118168	19127256	-	9088	2236	546	0.60748	0	0.163411	0.98498
XLOC_005477	chr6	137764900	137782759	+	17859						448			0	0.407799
XLOC_005478	chr6	137994548	138008360	+	13812	chr10	18921930	18935235	-	13305	716	360	0.33086	96	0.965959	0.741632
XLOC_005479	chr6	138144830	138182053	+	37223	chr10	18742504	18782793	-	40289	2340	1678	0.16476	0	3.34166	0.147312
XLOC_005482	chr6	139348760	139349782	+	1022	chr10	17743107	17744237	-	1130	245	194	0.11617	0	1.56328	0.594671
XLOC_005485	chr6	140297466	140414872	+	117406	chr10	16698428	16827887	-	129459	2340	2299	0.00884	96	1.85695	0.394849
XLOC_005486	chr6	141724593	141724930	+	337						257			0	1.51334
XLOC_005488	chr6	143703393	143704591	+	1198	chr10	13334043	13335052	-	1009	376	205	0.29432	0	0.250763	0
XLOC_005492	chr6	144606290	144609320	+	3030	chr10	12586283	12589102	-	2819	886	940	0.02957	0	1.39143	0.07507
XLOC_005495	chr6	147180316	147184217	+	3901	chr10	10036102	10039490	-	3388	455	141	0.52685	114	0.516246	0.245582
XLOC_005500	chr6	150255662	150256756	+	1094						500			225	0.548081
XLOC_005501	chr6	150260452	150262631	+	2179						2007			0	0.240575
XLOC_005502	chr6	150590871	150616896	+	26025	chr10	6839931	6853817	-	13886	1526	355	0.62254	132	0.632809	0.521203
XLOC_005510	chr6	154832084	154843051	+	10967	chr10	3127553	3134065	-	6512	611			114	1.18529
XLOC_005513	chr6	156318583	156327735	+	9152	chr17	4232097	4242881	+	10784	448	550	0.1022	144	1.89335	0.314792
XLOC_005514	chr6	156632037	156674882	+	42845	chr17	4535546	4564858	+	29312	2480	3188	0.12491	0	0.720436	0.100641
XLOC_005516	chr6	158137089	158210465	+	73376	chr17	5764637	5813850	+	49213	353	276	0.12242	0	7.54674	7.85513
XLOC_005517	chr6	158703294	158733390	+	30096						424	285	0.19605	0	4.033
XLOC_005520	chr6	159528337	159537085	+	8748	chr17	8057764	8058907	-	1143	1188			156	0.346275
XLOC_005522	chr6	159586940	159588385	+	1445	chr17	8021785	8023434	-	1649	385	944	0.42062	0	0.316413	0
XLOC_005523	chr6	159803507	159817475	+	13968	chr17	7859601	7867640	-	8039	1051	354	0.49609	177	0.211078	1.42065
XLOC_005529	chr6	161352111	161390803	+	38692	chr17	12524479	12562354	-	37875	573	46	0.85137	0	1.00206	49.5978
XLOC_005531	chr6	164092629	164195657	+	103028	chr17	10226466	10319854	-	93388	2303	390	0.71036	126	1.26359	0.958416
XLOC_005532	chr6	164348097	164429693	+	81596	chr17	10043706	10103753	-	60047	236	295	0.11111	0	5.98513	2.89681
XLOC_005539	chr6	167313393	167318514	+	5121	chr12	54030603	54033353	+	2750	4555	2676	0.25985	306	0.535734	0
XLOC_005540	chr6	167655378	167659404	+	4026						205	417	0.34084	0	1.75216
XLOC_005542	chr6	168152125	168152763	+	638						506	11	0.95745	0	0.51367
XLOC_005544	chr6	168630411	168641395	+	10984						1280			0	0.265069
XLOC_005545	chr6	168643617	168663261	+	19644						2246	340	0.73705	138	0.066444
XLOC_005550	chr6	169390443	169423958	+	33515	chr17	14715498	14729923	+	14425	348			0	0.787473
XLOC_005551	chr6	169467912	169469519	+	1607						401			0	0.325425
XLOC_005557	chr6	170340753	170348805	+	8052	chr17	15360473	15365258	+	4785	1127	69	0.88462	168	1.21303	7.19124
XLOC_005560	chr6	170454221	170456494	+	2273						1361	27	0.9611	0	0.437288
XLOC_005561	chr6	170462440	170466134	+	3694	chr17	15429496	15430092	+	596	488	168	0.4878	162	0.828968	0
XLOC_005563	chr6	170483165	170494926	+	11761	chr17	15444102	15450831	+	6729	7890	2908	0.46138	0	0.757114	0.020709
XLOC_005564	chr6	170584461	170588557	+	4096	chr17	15499326	15500192	+	866	403	229	0.27532	0	1.33568	0
XLOC_005566	chr6	171030441	171045633	+	15192	chr11	121672635	121678735	+	6100	1223	123	0.81724	150	0.02134	0.26227
XLOC_005567	chr6	277863	286279	-	8416	chr13	30739852	30745751	-	5899	721	169	0.62022	270	1.31819	0.901446
XLOC_005571	chr6	958562	1101698	-	143136	chr13	31333249	31457451	-	124202	3140	3498	0.05393	105	2.18773	0.106856
XLOC_005572	chr6	1060089	1063404	-	3315	chr13	31415457	31418635	-	3178	533	265	0.33584	0	0	0
XLOC_005574	chr6	1308820	1311276	-	2456	chr13	31646773	31649180	-	2407	565	573	0.00703	0	0.383305	0
XLOC_005575	chr6	1321762	1335838	-	14076	chr13	31656045	31670505	-	14460	1865	1751	0.03153	0	0.344349	0.213468
XLOC_005579	chr6	2791141	2822143	-	31002	chr13	32918762	32925483	-	6721	837	453	0.29767	0	2.42354	1.8887
XLOC_005583	chr6	3182977	3196001	-	13024	chr13	34184459	34188795	-	4336	1517	517	0.49164	123	0.150945	0.171933
XLOC_005584	chr6	3594480	3632287	-	37807	chr13	34588571	34618283	-	29712	1149			0	0.431578
XLOC_005587	chr6	4016674	4021449	-	4775	chr13	34958640	34967315	-	8675	2540	7949	0.51568	0	0.524037	0.548876
XLOC_005589	chr6	4341702	4347376	-	5674	chr13	35292124	35295806	-	3682	3993	1998	0.333	126	7.51679	0.069324
XLOC_005592	chr6	5031989	5055048	-	23059						6436	930	0.74749	0	1.12848
XLOC_005595	chr6	6694899	6745648	-	50749	chr13	37543649	37595386	-	51737	5077	2805	0.28825	0	3.03245	3.44652
XLOC_005602	chr6	10428017	10435107	-	7090	chr13	40842233	40853258	-	11025	3365	2975	0.06151	0	0.081439	0.047932
XLOC_005607	chr6	11865832	11868724	-	2892	chr13	42003810	42005817	-	2007	446	443	0.00337	0	0.273767	0.723217
XLOC_005616	chr6	14391461	14393519	-	2058	chr13	44122388	44124175	-	1787	489	780	0.22931	0	0.23746	0.036976
XLOC_005617	chr6	14444895	14448968	-	4073	chr13	44153588	44156859	-	3271	474	195	0.41704	0	0.547157	1.36917
XLOC_005618	chr6	14977018	15090234	-	113216	chr13	44649711	44730839	-	81128	1017	488	0.3515	147	0.731391	2.28933
XLOC_005621	chr6	15695348	15758477	-	63129	chr13	45128818	45174823	-	46005	1859	1116	0.24975	111	1.22844	0.526319
XLOC_005622	chr6	16126536	16129130	-	2594	chr13	45483393	45484934	-	1541	2456	1409	0.27089	0	0.329427	0.114476
XLOC_005629	chr6	18744006	18757698	-	13692	chr13	47556115	47568299	-	12184	3458	2849	0.09656	144	0.620494	0.194834
XLOC_005633	chr6	19707696	19749995	-	42299	chr13	48237816	48276669	-	38853	1208	1992	0.245	108	2.75639	0.562925
XLOC_005634	chr6	19802394	19804981	-	2587	chr13	48320387	48323181	-	2794	2299	2589	0.05933	0	1.25405	0
XLOC_005635	chr6	20331467	20334683	-	3216	chr13	30138438	30140153	+	1715	654	304	0.36534	0	1.87562	0
XLOC_005637	chr6	21486297	21502716	-	16419	chr13	29124391	29142139	+	17748	566	568	0.00176	0	0.668617	0.658068
XLOC_005665	chr6	28805645	28806783	-	1138	chr13	21325846	21326076	+	230	709			99	0.17457
XLOC_005667	chr6	28996285	29003941	-	7656	chr13	21235815	21238201	-	2386	459	71	0.73208	108	1.16565	0.502102
XLOC_005675	chr6	30807302	30815936	-	8634	chr17	35853209	35859068	+	5859	817	369	0.37774	0	0.079863	4.78087
XLOC_005677	chr6	31139385	31154249	-	14864	chr17	35635830	35642496	+	6666	6120	4866	0.11415	126	4.67474	0.152398
XLOC_005689	chr6	33857288	33864684	-	7396	chr17	27459391	27465688	-	6297	4215	3582	0.08119	150	3.17648	0.014177
XLOC_005701	chr6	36807549	36816400	-	8851	chr17	29374899	29381623	-	6724	2399	1787	0.1462	153	0.961545	0.316754
XLOC_005703	chr6	37301808	37307755	-	5947						538			0	0.291068
XLOC_005711	chr6	40239304	40244055	-	4751						706	170	0.61187	0	0.14787
XLOC_005712	chr6	40312082	40323745	-	11663	chr17	49286392	49295143	+	8751	3169	446	0.75325	0	0.243349	2.28623
XLOC_005715	chr6	40846473	40966970	-	120497	chr17	48641352	48755608	+	114256	3643	1662	0.37342	0	1.93273	0.873444
XLOC_005716	chr6	41137778	41145579	-	7801						982			0	0.554623
XLOC_005718	chr6	41349174	41350213	-	1039	chr17	48226940	48227674	+	734	937	555	0.25603	0	0.724202	0
XLOC_005724	chr6	42909007	42915981	-	6974						1889	315	0.71416	96	5.58642
XLOC_005729	chr6	43690522	43705589	-	15067	chr17	46197305	46213456	+	16151	875	1338	0.20922	99	1.21459	0.185424
XLOC_005730	chr6	43812607	43820084	-	7477	chr17	46081227	46088413	+	7186	1895	2416	0.12085	0	0.075749	0.043811
XLOC_005737	chr6	45523579	45545334	-	21755	chr17	44715196	44735864	+	20668	6021	4767	0.11624	0	0.585182	0.531691
XLOC_005741	chr6	50555319	50604918	-	49599	chr1	18948247	19003481	-	55234	826	786	0.02481	129	0.050935	0.453552
XLOC_005747	chr6	53426086	53481967	-	55881	chr9	77551895	77594806	+	42911	4154	630	0.73662	0	0.427837	3.76907
XLOC_005748	chr6	53605546	53659072	-	53526	chr9	77393278	77437241	+	43963	2611	1059	0.42289	0	0.425089	1.23332
XLOC_005749	chr6	54704915	54705653	-	738						586			0	0.206871
XLOC_005751	chr6	57125323	57128144	-	2821	chr1	33750634	33753273	+	2639	1469	526	0.47268	0	0.353869	0.204975
XLOC_005753	chr6	58234691	58239687	-	4996	chr15	22372597	22373861	-	1264	4445	1264	0.55719	156	0.389827	0.024445
XLOC_005755	chr6	62340206	62371274	-	31068	chr1	32740077	32769430	+	29353	385	331	0.07542	162	2.43849	0.645287
XLOC_005757	chr6	68936863	69039791	-	102928	chr1	26240192	26352362	+	112170	674	208	0.52834	0	0.348226	2.03152
XLOC_005760	chr6	71897276	71943366	-	46090	chr1	23460294	23505478	+	45184	228	150	0.20635	90	9.27511	6.57874
XLOC_005764	chr6	72117910	72130522	-	12612	chr1	23263121	23274373	+	11252	5299	4591	0.07159	0	2.67184	0.011061
XLOC_005768	chr6	77822660	77860954	-	38294	chr9	81207332	81233891	-	26559	473			0	0.708844
XLOC_005769	chr6	78060411	78078829	-	18418	chr9	81424160	81435289	-	11129	267			0	0.244374
XLOC_005772	chr6	80513299	80516942	-	3643	chr9	83575957	83578130	-	2173	481	126	0.58484	144	0.243976	0.560045
XLOC_005774	chr6	82553500	82648074	-	94574	chr9	85318864	85387347	-	68483	2329	1600	0.18554	120	0.339746	0.500601
XLOC_005777	chr6	86096938	86099904	-	2966	chr9	88149983	88154976	-	4993	2511	4256	0.25787	165	0.475455	0
XLOC_005778	chr6	86354448	86356991	-	2543	chr9	88378603	88384688	-	6085	208	152	0.15556	0	0.863444	2.34534
XLOC_005782	chr6	92100030	92102718	-	2688						442	368	0.09136	0	0.037929
XLOC_005783	chr6	93299039	93299804	-	765	chr4	29571140	29572044	+	904	320	322	0.00312	0	0.44152	0
XLOC_005784	chr6	95256289	95317650	-	61361	chr4	27354203	27394246	+	40043	2160	924	0.40078	0	0.651957	0.093641
XLOC_005792	chr6	104785423	104786550	-	1127	chr10	45943845	45944821	+	976	453	394	0.06966	0	0.185748	0
XLOC_005793	chr6	104910762	104951475	-	40713	chr10	45763461	45800461	+	37000	571	533	0.03442	0	1.3017	0.133768
XLOC_005794	chr6	105374298	105379376	-	5078						485			111	0.887908
XLOC_005798	chr6	106938971	106950059	-	11088	chr10	43734271	43745071	+	10800	738	910	0.10437	186	1.91927	0.576092
XLOC_005807	chr6	112697489	112717623	-	20134						1229	230	0.68472	96	1.2954
XLOC_005808	chr6	113667193	113698013	-	30820	chr10	37322913	37352708	+	29795	1562	1228	0.11971	0	0.07519	0.096361
XLOC_005809	chr6	113749741	113754623	-	4882	chr10	37224719	37250593	+	25874	607	79	0.76968	105	0.183514	1.33985
XLOC_005810	chr6	113943170	113971276	-	28106	chr10	37037985	37066122	+	28137	3400	839	0.60415	0	0.570284	0.192248
XLOC_005811	chr6	114189182	114194729	-	5547	chr10	36834867	36849921	+	15054	4086	1149	0.56103	0	0.332029	0.500003
XLOC_005812	chr6	114798513	114809916	-	11403	chr10	36049409	36059019	+	9610	943	537	0.27432	168	0.16606	0.229705
XLOC_005813	chr6	114844607	114866483	-	21876	chr10	35964250	36007688	+	43438	614	561	0.04511	0	0.913894	0.188678
XLOC_005815	chr6	116222977	116247857	-	24880	chr10	34335684	34376779	+	41095	623	576	0.0392	0	0.460819	0.183765
XLOC_005818	chr6	117993975	117996447	-	2472	chr10	52134629	52137105	-	2476	1647	1192	0.16027	93	0.068903	0.028351
XLOC_005827	chr6	125691356	125766329	-	74973	chr10	30892703	30949466	+	56763	1102	1033	0.03232	96	0.864444	0.71727
XLOC_005834	chr6	133125512	133134602	-	9090	chr10	23507706	23513697	+	5991	640	110	0.70667	201	0.488988	1.38495
XLOC_005846	chr6	137300371	137314368	-	13997	chr10	19488501	19515284	+	26783	2887	2225	0.1295	0	0.104064	0.075942
XLOC_005847	chr6	137992330	137994453	-	2123	chr10	18935329	18935692	+	363	1278	116	0.83357	0	0.408437	0
XLOC_005848	chr6	138051306	138060120	-	8814	chr10	18869627	18881167	+	11540	737	953	0.12781	0	0.389539	2.18435
XLOC_005849	chr6	138144809	138148172	-	3363	chr10	18779964	18782811	+	2847	1140	943	0.09458	0	0.622164	0.319314
XLOC_005851	chr6	138264215	138266939	-	2724	chr10	18673123	18675868	+	2745	573	832	0.18434	153	0.568011	0.256719
XLOC_005854	chr6	139613295	139645051	-	31756						549	455	0.09363	0	1.05938
XLOC_005856	chr6	139777986	139795737	-	17751	chr10	17352195	17368025	+	15830	2747	3854	0.1677	0	0.331838	0.137625
XLOC_005859	chr6	140413888	140415734	-	1846	chr10	16698428	16699208	+	780	646	422	0.20974	168	7.41152	0.160163
XLOC_005862	chr6	142847591	142959026	-	111435	chr10	13963848	14063847	+	99999	2562	2600	0.00736	120	0.12168	0.184837
XLOC_005866	chr6	146903782	146920067	-	16285	chr10	10192211	10208745	+	16534	952	775	0.10249	0	0.315273	0.049567
XLOC_005868	chr6	148059207	148064467	-	5260	chr10	9189636	9193999	+	4363	978	434	0.38527	129	0.493695	1.55734
XLOC_005870	chr6	148454944	148458540	-	3596	chr10	8801237	8806834	+	5597	426	395	0.03776	90	0.600756	2.86602
XLOC_005871	chr6	148476260	148478197	-	1937	chr10	8778777	8780413	+	1636	291	488	0.25289	0	1.79375	1.03876
XLOC_005883	chr6	153625729	153630117	-	4388	chr10	4238419	4244052	+	5633	440	458	0.02004	0	0.14829	0.060189
XLOC_005888	chr6	156130116	156133176	-	3060	chr17	4047047	4047641	-	594	901	307	0.49172	0	0.289668	0.110079
XLOC_005891	chr6	156814359	156820905	-	6546	chr17	4704833	4708924	-	4091	811	493	0.24387	0	0.030523	0.111831
XLOC_005898	chr6	159774953	159775705	-	752						420			0	0.186422
XLOC_005900	chr6	159990580	160016234	-	25654	chr17	7722101	7732133	+	10032	3789	1786	0.35928	153	2.17233	0.028433
XLOC_005902	chr6	160536100	160539659	-	3559	chr17	12870501	12872435	+	1934	1905			225	0.626703
XLOC_005905	chr6	161216348	161228213	-	11865						379			0	0.457198
XLOC_005909	chr6	163759373	163768065	-	8692	chr17	10571867	10581887	+	10020	5277	6516	0.10506	0	0.413	0.146067
XLOC_005910	chr6	163810450	163814232	-	3782	chr17	10530898	10534234	+	3336	607	391	0.21643	0	0.236483	0.079025
XLOC_005912	chr6	164085402	164092730	-	7328	chr17	10320962	10329664	+	8702	665	276	0.41339	0	0.137364	0.935049
XLOC_005913	chr6	164529651	164530726	-	1075	chr17	9949416	9950263	+	847	448	342	0.13418	0	0.604262	0
XLOC_005915	chr6	165206863	165241153	-	34290	chr17	9433298	9456005	+	22707	1153	2707	0.40259	177	0.71246	0.051167
XLOC_005916	chr6	166186539	166190289	-	3750	chr17	8879550	8881055	+	1505	736	264	0.472	99	0.531911	0.384708
XLOC_005918	chr6	166315364	166324507	-	9143	chr17	8779088	8780723	+	1635	1219			231	5.09344
XLOC_005921	chr6	167647447	167655400	-	7953	chr17	13644864	13646223	-	1359	5670	281	0.90556	0	0.266974	2.15672
XLOC_005923	chr6	168080305	168096970	-	16665	chr17	13806488	13817340	-	10852	3867	2214	0.27183	0	0.627675	0.404727
XLOC_005924	chr6	168185220	168198899	-	13679	chr17	13871758	13876013	-	4255	4439	1194	0.57607	0	0.520885	0.032173
XLOC_005925	chr6	168224569	168227476	-	2907	chr17	13895488	13897463	-	1975	2311	1406	0.24348	129	0.187423	0.068832
XLOC_005927	chr6	168393505	168397757	-	4252	chr17	14051430	14055028	-	3598	3069	1109	0.46912	0	0.16934	0.286335
XLOC_005928	chr6	168625958	168627197	-	1239						455			0	0.172082
XLOC_005933	chr6	169362704	169364436	-	1732	chr17	14695381	14696979	-	1598	914	156	0.70841	99	4.05479	0.568903
XLOC_005935	chr6	169557256	169563089	-	5833	chr17	14777440	14778754	-	1314	2245	674	0.5382	0	0.086643	0
XLOC_005938	chr6	169754594	169789822	-	35228						5972	1312	0.63976	0	0.405986
XLOC_005939	chr6	169818906	169846389	-	27483						9090			0	0.472311
XLOC_005940	chr6	170124794	170126184	-	1390						1290	78	0.88596	0	1.25438
XLOC_005942	chr6	170337138	170337952	-	814						452			0	0.202095
XLOC_005944	chr6	170453079	170454248	-	1169						1034	27	0.9491	255	0.630396
XLOC_005948	chr6	170563421	170571657	-	8236	chr17	15487475	15490412	-	2937	1330	377	0.55829	156	0.088235	0.093588
XLOC_005951	chr6	171045260	171046865	-	1605	chr11	121678612	121678923	-	311	499			0	0.078454
XLOC_005952	chr7	77037	80886	+	3849						734			264	0.371008
XLOC_005953	chr7	149596	155427	+	5831	chr5	139181243	139182706	+	1463	5111	1303	0.5937	0	0.727426	0.023109
XLOC_005955	chr7	389256	391503	+	2247						1891			0	0.817663
XLOC_005956	chr7	419390	422845	+	3455	chr5	139364454	139365246	+	792	2247			123	0.246975
XLOC_005957	chr7	465455	468067	+	2612	chr5	139400554	139400873	+	319	1031			159	0.243908
XLOC_005958	chr7	560027	565027	+	5000	chr5	139472146	139475756	+	3610	4289	3026	0.17266	135	0.934946	0.46907
XLOC_005963	chr7	1499553	1503644	+	4091	chr5	140212510	140222097	+	9587	575	1011	0.27491	111	0.93049	0.263767
XLOC_005965	chr7	1659119	1682389	+	23270	chr5	140348126	140366886	+	18760	1573	195	0.77941	0	2.4639	3.24276
XLOC_005968	chr7	2477397	2488305	+	10908	chr5	141002522	141012391	+	9869	3281	465	0.75174	0	1.20942	0.074467
XLOC_005972	chr7	4473993	4518319	+	44326	chr5	142761719	142794086	+	32367	2689	81	0.94152	0	1.12772	14.5238
XLOC_005976	chr7	5834112	5855979	+	21867						581	28	0.90805	0	1.63962
XLOC_005979	chr7	6120733	6132716	+	11983						820	320	0.4386	0	1.01843
XLOC_005981	chr7	7294784	7317410	+	22626	chr6	7834766	7860151	+	25385	908	191	0.65241	108	1.3139	0.186645
XLOC_005984	chr7	10000650	10021444	+	20794	chr6	10709307	10732801	+	23494	361	203	0.28014	120	1.22904	0.750465
XLOC_005985	chr7	10716285	10747385	+	31100	chr6	11525814	11544226	+	18412	868	592	0.18904	267	0.150341	0.381443
XLOC_005988	chr7	13141015	13743774	+	602759	chr12	39821940	40407027	-	585087	989	372	0.45334	183	3.67489	28.6207
XLOC_005991	chr7	15728002	15736507	+	8505	chr12	37825110	37833376	-	8266	1244	705	0.27655	228	4.7272	0.07203
XLOC_006001	chr7	19152096	19153891	+	1795	chr12	34645774	34647524	-	1750	1708	1661	0.01395	90	0.697915	0.44608
XLOC_006009	chr7	22602904	22641942	+	39038	chr5	30167980	30207780	+	39800	4767	5800	0.09776	198	1.44918	0.058601
XLOC_006015	chr7	25805267	25807263	+	1996	chr6	51036183	51036673	+	490	445	25	0.89362	0	1.61287	0
XLOC_006016	chr7	25878710	25888418	+	9708	chr6	51102717	51114750	+	12033	2334	2517	0.03772	159	2.52525	0.084859
XLOC_006025	chr7	27224966	27228912	+	3946	chr6	52195930	52199789	+	3859	1998	1958	0.01011	0	3.76069	0.045326
XLOC_006028	chr7	27401264	27449622	+	48358	chr6	52382760	52420712	+	37952	806	650	0.10714	0	4.0962	0.774122
XLOC_006035	chr7	30428961	30452157	+	23196	chr6	54853721	54866978	+	13257	3257	1792	0.29016	0	2.09425	0.113351
XLOC_006039	chr7	33900207	33917087	+	16880	chr9	22979516	22997888	+	18372	534	405	0.13738	0	0.480461	0.174236
XLOC_006043	chr7	35755719	35774497	+	18778	chr9	24979205	25005690	+	26485	3798	6669	0.27429	138	1.67293	0.114229
XLOC_006045	chr7	36134922	36140254	+	5332	chr9	25241878	25244880	+	3002	1843			159	0
XLOC_006051	chr7	37532459	37570312	+	37853	chr13	20058032	20133613	-	75581	322	114	0.47706	105	0.607899	8.43118
XLOC_006053	chr7	38052955	38055984	+	3029						333			0	0.854868
XLOC_006058	chr7	39820782	39822369	+	1587						887			99	0.491728
XLOC_006059	chr7	41137092	41173105	+	36013	chr13	16734769	16762387	-	27618	2054	1707	0.09226	0	0.177891	0.312815
XLOC_006069	chr7	44887842	44889231	+	1389	chr11	6344595	6344972	+	377	626	330	0.30962	90	0.229305	0.102407
XLOC_006070	chr7	45034627	45038116	+	3489						281	190	0.19321	0	0.882354
XLOC_006073	chr7	45241392	45243749	+	2357						1221			0	0.487948
XLOC_006080	chr7	46017132	46030148	+	13016	chr11	7137568	7146479	+	8911	400	120	0.53846	0	1.8803	0.577118
XLOC_006088	chr7	47622654	47630846	+	8192	chr11	8565449	8569526	+	4077	1257	229	0.69179	0	0.14655	3.17801
XLOC_006089	chr7	47661536	47669491	+	7955	chr11	8580327	8588417	+	8090	2761	786	0.55681	93	0.056717	0.110082
XLOC_006091	chr7	48748091	48750837	+	2746						413			0	5.2767
XLOC_006097	chr7	51681946	51698566	+	16620	chr11	12658150	12694429	+	36279	588	348	0.25641	0	0.063148	5.42934
XLOC_006100	chr7	52561401	52569695	+	8294	chr11	13768096	13772409	+	4313	341	224	0.20708	0	0.47185	0.246129
XLOC_006101	chr7	52839106	52842788	+	3682	chr11	14215167	14218021	+	2854	512	83	0.72101	90	0.152924	3.21672
XLOC_006102	chr7	54398389	54417542	+	19153	chr11	15892243	15938699	+	46456	1146	856	0.14486	0	1.44825	0.572787
XLOC_006105	chr7	55659766	55660886	+	1120	chr17	34197653	34198657	+	1004	939	811	0.07314	0	0.055589	0
XLOC_006106	chr7	55661469	55662699	+	1230						543			0	0.16717
XLOC_006110	chr7	56680290	56683113	+	2823						420			0	2.85847
XLOC_006112	chr7	56726843	56742773	+	15930						1298			0	2.34249
XLOC_006115	chr7	62809447	62812151	+	2704	chr16	17925835	17927752	+	1917	654	780	0.08787	117	0.239441	18.6403
XLOC_006118	chr7	63168769	63176135	+	7366						5848	272	0.91111	0	0.01562
XLOC_006128	chr7	64103411	64116285	+	12874						1232			0	0.402503
XLOC_006132	chr7	65292533	65293652	+	1119						245			144	0.639162
XLOC_006133	chr7	65958692	65960583	+	1891	chr5	130384426	130387266	+	2840	698	495	0.17016	183	2.84174	0.167069
XLOC_006138	chr7	66800295	66821094	+	20799	chr13	83642582	83646473	+	3891	1794	793	0.38693	0	4.45146	0.044955
XLOC_006139	chr7	67485239	67497677	+	12438	chr5	134144608	134147828	-	3220	510	74	0.74658	138	0.204699	0
XLOC_006141	chr7	68505138	68511790	+	6652						419	169	0.42517	0	0.186867
XLOC_006142	chr7	69054795	69063004	+	8209	chr5	133019781	133026572	-	6791	1899	1756	0.03912	0	3.76575	0.034295
XLOC_006151	chr7	76312461	76318469	+	6008	chr3	147274493	147279350	-	4857	580	623	0.03574	0	0.217614	0
XLOC_006156	chr7	79327349	79328605	+	1256	chr5	18429456	18430846	-	1390	770	929	0.09358	0	0.217722	0.033585
XLOC_006159	chr7	84161791	84213638	+	51847	chr5	13019380	13075171	-	55791	4276	240	0.89371	0	0.103951	1.9043
XLOC_006163	chr7	88983549	89126232	+	142683	chr5	6598386	6753140	-	154754	1316	711	0.29847	0	2.23191	1.80502
XLOC_006169	chr7	92074773	92076644	+	1871						1212			0	1.5635
XLOC_006177	chr7	95101146	95103310	+	2164	chr6	5329236	5331229	+	1993	534	431	0.10674	132	0.162245	0
[truncated: 2,668 more rows]

## Sheet: mm
DATA	Comprehensive information on all mouse lincRNA clusters and their putative orthologs
	ort_ suffix denotes the putative ortholog data fields (hg19/mm9 genome coordinates)
	chr=chromosome, start = lincRNA gene start, end = lincRNA gene end, strand = DNA strand, length = lincRNA gene length
	Raw RNAseq read counts are available for each lincRNA at ftp://ftp.ncbi.nlm.nih.gov/pub/koonin/num_lincRNA/lincRNA_exp.xls
	ORFs were analyzed in mouse lincRNAs, ORF length less than 90 nt is given as 0.
name	chr	start	end	strand	length	ort_chr	ort_start	ort_end	ort_strand	ort_length	exon_length	ort_exon_length	indel	ORF_length	RPKM	ort_RPKM
mlclust_1	chr1	3063333	3064403	+	1070	chr8	56535074	56535248	-	174	1070	174	0.72026	0	0.099808	0
mlclust_2	chr1	4486631	4489459	+	2828	chr8	55364183	55367391	-	3208	2828	3208	0.06296	0	0.07985	0.004417
mlclust_3	chr1	4847347	4848444	-	1097	chr8	54934048	54934947	+	899	1097	899	0.0992	0	2.16584	0.18109
mlclust_4	chr1	6199946	6204661	-	4715	chr8	53627091	53635700	+	8609	4715	8609	0.29225	117	0.024285	0.617892
mlclust_5	chr1	7162622	7163705	+	1083	chr8	52730062	52730350	-	288	1083	288	0.57987	0	0.109263	27.3759
mlclust_6	chr1	7339486	7387882	-	48396	chr7	92601854	92624206	+	22352	4966	2019	0.4219	111	0.502804	0.084024
mlclust_7	chr1	9181147	9182197	-	1050						1048			0	0.152855
mlclust_8	chr1	9737728	9782003	+	44275	chr8	67578681	67614826	+	36145	2253	1563	0.18082	192	6.85411	7.71435
mlclust_9	chr1	10061263	10066272	+	5009	chr8	68011599	68016333	+	4734	5007	4733	0.02813	0	0.010142	0.127389
mlclust_10	chr1	11290240	11293554	+	3314	chr8	69146021	69149036	+	3015	3314	3015	0.04724	0	0.021293	6.33521
mlclust_11	chr1	12657643	12663171	+	5528	chr8	70356940	70361515	+	4575	3198	1026	0.5142	111	0.011147	0.089032
mlclust_12	chr1	14745534	14748452	+	2918	chr8	72756103	72759283	+	3180	2918	3180	0.04296	0	0.094934	0.44041
mlclust_13	chr1	14778725	14783046	+	4321	chr8	72831040	72836399	+	5359	4320	5358	0.10725	0	0	0.037065
mlclust_14	chr1	16541151	16543613	-	2462						2458			0	0.152068
mlclust_15	chr1	16556090	16557914	-	1824	chr8	74700551	74702978	-	2427	1824	2427	0.14185	0	0.879149	3.95224
mlclust_16	chr1	16677783	16679061	-	1278	chr8	74901748	74904169	-	2421	1275	2418	0.3095	0	1.20652	0.326154
mlclust_17	chr1	17158485	17163184	+	4699	chr8	75291150	75296398	+	5248	1009	911	0.05104	0	0.050329	0.644085
mlclust_18	chr1	17715064	17717336	-	2272	chr8	75893931	75896542	-	2611	2146	2503	0.07679	0	0.013785	0.015641
mlclust_19	chr1	19053380	19094921	-	41541	chr6	50646911	50683305	-	36394	918	729	0.11475	93	3.43273	0.038917
mlclust_20	chr1	19604349	19606848	+	2499						2499			0	0
mlclust_21	chr1	20878730	20880554	-	1824	chr6	52225169	52226824	-	1655	1120	703	0.22874	105	0	0
mlclust_22	chr1	20986381	20990463	-	4082	chr6	52362201	52366850	-	4649	4080	4647	0.06497	0	0.380501	8.77345
mlclust_23	chr1	23398587	23404611	-	6024	chr6	71988806	71990476	+	1670	1522	1317	0.07221	0	0.233555	0.235232
mlclust_24	chr1	25020840	25022003	-	1163						748			108	0
mlclust_25	chr1	25887501	25888723	+	1222	chr6	69343414	69344622	-	1208	1222	1208	0.00576	174	0.022057	2.74784
mlclust_26	chr1	28626762	28628276	-	1514						1508			0	0
mlclust_27	chr1	30932285	30935067	+	2782	chr6	64342403	64344060	-	1657	2782	1657	0.25344	0	0.031901	0.073518
mlclust_28	chr1	34636046	34636456	-	410	chr2	131513253	131513800	-	547	410	547	0.14316	99	0	0.030648
mlclust_29	chr1	35936689	35937964	+	1275	chr2	129252024	129252205	-	181	566	150	0.58101	105	0.047622	0
mlclust_30	chr1	36067916	36068739	+	823						425			0	0.069717
mlclust_31	chr1	36086491	36087863	-	1372	chr2	129105221	129106584	+	1363	1372	1363	0.00329	0	0.021562	0.019861
mlclust_32	chr1	36614545	36616512	+	1967	chr2	97535304	97537189	+	1885	1967	1885	0.02129	0	0.150635	0.676303
mlclust_33	chr1	37356963	37359614	+	2651	chr2	99061548	99064212	+	2664	2651	2664	0.00245	156	0	0.06293
mlclust_34	chr1	39042434	39044532	-	2098	chr2	101177974	101179348	-	1374	2098	1374	0.20853	0	0.014101	0.010324
mlclust_35	chr1	39604432	39608847	-	4415						1814	257	0.75181	0	0.189198
mlclust_36	chr1	39707020	39714235	+	7215	chr2	102003089	102006983	+	3894	3663	1215	0.50185	210	0.264906	0.262163
mlclust_37	chr1	39860993	39862177	-	1184	chr2	102174351	102175692	-	1341	351	165	0.36047	0	0	0.474529
mlclust_38	chr1	40082114	40083150	+	1036	chr2	102508235	102509270	+	1035	1036	1035	0.00048	0	0.154626	38.2104
mlclust_39	chr1	40105883	40107213	-	1330	chr2	102563113	102564286	-	1173	1330	1173	0.06272	0	0	0
mlclust_40	chr1	40912036	40913731	+	1695	chr2	103431606	103433371	+	1765	1695	1765	0.02023	0	0	23.5097
mlclust_41	chr1	42757180	42760021	+	2841	chr2	105475158	105477799	+	2641	2841	2641	0.03648	0	0.2498	3.30492
mlclust_42	chr1	42763916	42764897	-	981	chr2	105481943	105482785	-	842	981	842	0.07625	0	0.26996	0.287948
mlclust_43	chr1	42807556	42809726	+	2170	chr2	105524951	105526284	+	1333	2170	1333	0.23894	0	0.014378	0.060628
mlclust_44	chr1	45431175	45431878	-	703	chr2	189896941	189897669	-	728	703	728	0.01747	0	0.072235	18.4739
mlclust_45	chr1	46934047	46937917	-	3870	chr2	196485512	196490532	+	5020	3869	5020	0.12949	0	0.008735	0.051664
mlclust_46	chr1	47490667	47492609	-	1942	chr2	196001472	196002242	+	770	1941	769	0.43247	147	0.034822	0
mlclust_47	chr1	50957490	50970769	+	13279	chr2	193072420	193079130	-	6710	1271	1402	0.04901	90	0.798232	0.107619
mlclust_48	chr1	51514777	51515775	-	998	chr2	192567456	192569299	+	1843	545	60	0.80165	0	0	1.9353
mlclust_49	chr1	52220293	52222002	-	1709	chr2	191828745	191830277	+	1532	1709	1532	0.05461	162	0.587587	37.9393
mlclust_50	chr1	52567563	52569716	+	2153						2153			0	0.074404
mlclust_51	chr1	52626857	52637136	-	10279	chr2	191441689	191450948	+	9259	2943	2560	0.0696	0	0.070596	0.183363
mlclust_52	chr1	53848044	53849499	+	1455	chr2	197040840	197042138	+	1298	1455	1298	0.05703	108	0.071396	0.119886
mlclust_53	chr1	53863725	53866474	-	2749	chr2	197059105	197062466	-	3361	2749	3361	0.10016	0	0.051872	2.68852
mlclust_54	chr1	54535207	54536447	-	1240	chr2	197702992	197704757	-	1765	1240	1765	0.17471	0	0.081906	1.86403
mlclust_55	chr1	55301192	55302698	+	1506	chr2	198578586	198580255	+	1669	1506	1669	0.05134	93	0.076604	0.388485
mlclust_56	chr1	55481894	55483796	+	1902	chr2	198689557	198690600	+	1043	1900	1043	0.2912	0	0.028104	0.141443
mlclust_57	chr1	55497747	55498819	+	1072	chr2	198707351	198708262	+	911	1072	911	0.08119	0	0.030093	0.338595
mlclust_58	chr1	55616303	55617899	+	1596	chr2	198793068	198794972	+	1904	1596	1904	0.088	0	0	0.070438
mlclust_59	chr1	55948920	55972689	+	23769	chr2	199180711	199203753	+	23042	1620	1245	0.13089	0	0.219426	0.104816
mlclust_60	chr1	56588667	56590720	+	2053	chr2	199825804	199827759	+	1955	2053	1955	0.02445	102	0.024735	0
mlclust_61	chr1	57028323	57099357	+	71034	chr2	200322424	200419428	+	97004	7326	7369	0.00293	0	0.26755	0.716631
mlclust_62	chr1	57184183	57186245	+	2062	chr2	200502494	200512712	+	10218	2062	10218	0.66417	147	0	0.027892
mlclust_63	chr1	57416065	57434388	-	18323	chr2	200761330	200775922	-	14592	2051	1944	0.02678	0	0.025825	1.1076
mlclust_64	chr1	58462257	58464197	+	1940	chr2	201687245	201689749	+	2504	1940	2504	0.12691	0	0.076245	11.665
mlclust_65	chr1	59545323	59549449	-	4126	chr2	202904593	202907502	-	2909	3586	2369	0.20437	0	0.407423	0.049537
mlclust_66	chr1	59572639	59573479	-	840	chr2	202928735	202929629	-	894	839	893	0.03118	153	0	0
mlclust_67	chr1	59773381	59775888	+	2507	chr2	203174906	203175999	+	1093	2507	1093	0.39278	0	0.12132	0.142762
mlclust_68	chr1	59819052	59820692	-	1640	chr2	203239651	203241368	-	1717	1640	1717	0.02294	162	1.21955	0.685721
mlclust_69	chr1	59933714	59935858	+	2144	chr2	203431709	203434260	+	2551	2144	2551	0.08669	0	0.045139	12.6592
mlclust_70	chr1	60393136	60395162	+	2026	chr2	204088118	204089907	+	1789	2026	1789	0.06212	0	0.032518	4.86079
mlclust_71	chr1	60539153	60542727	-	3574	chr2	204298484	204301418	-	2934	3573	2862	0.11049	168	0.298538	7.69348
mlclust_72	chr1	60621649	60622603	-	954	chr2	204398244	204398931	-	687	954	687	0.16271	0	0.06541	0.224294
mlclust_73	chr1	60833508	60838537	-	5029	chr2	204605382	204611650	-	6268	704	670	0.02475	0	0.639421	4.017
mlclust_74	chr1	60834132	60835127	+	995	chr2	204606048	204607213	+	1165	995	1165	0.0787	0	0.028986	0.41906
mlclust_75	chr1	60937181	60938582	+	1401	chr2	204700835	204702322	+	1487	1400	1487	0.03014	0	0.020601	0.028293
mlclust_76	chr1	61663516	61667723	-	4207	chr2	205391383	205395048	-	3665	847	761	0.05348	153	0.244487	0
mlclust_77	chr1	63165883	63168631	+	2748	chr2	206956934	206960654	+	3720	2748	3720	0.15028	120	0.011987	0.047301
mlclust_78	chr1	64076036	64079501	-	3465	chr2	207939826	207943255	-	3429	3196	3216	0.00312	0	0.017913	5.62457
mlclust_79	chr1	64726444	64737233	-	10789	chr2	208564953	208576096	-	11143	2051	1579	0.13003	0	0.338453	0.082644
mlclust_80	chr1	64770593	64772210	+	1617	chr2	208618758	208620890	+	2132	1617	2132	0.13737	0	0.1091	5.999
mlclust_81	chr1	64782813	64787181	+	4368	chr2	208633102	208638557	+	5455	4365	5455	0.111	135	0.482885	0.174091
mlclust_82	chr1	66743571	66746440	-	2869	chr2	210861803	210866045	-	4242	2866	4239	0.19324	0	26.2285	4.13678
mlclust_83	chr1	66858888	66861067	+	2179	chr2	211030943	211032776	+	1833	2178	1832	0.08628	0	0.637146	0.080876
mlclust_84	chr1	68568801	68569752	-	951	chr2	212787052	212787631	-	579	951	579	0.24314	0	0.060655	0
mlclust_85	chr1	68685997	68687403	-	1406						1406			0	0
mlclust_86	chr1	68690936	68693386	-	2450	chr2	212880883	212882930	-	2047	2450	2047	0.08962	93	0.021795	0.075361
mlclust_87	chr1	68805058	68808301	-	3243	chr2	213010933	213014848	-	3915	3243	3915	0.09388	0	0.010157	0.121792
mlclust_88	chr1	68918507	68921044	-	2537	chr2	213146091	213148645	-	2554	2537	2554	0.00334	0	0	0.158217
mlclust_89	chr1	69114399	69116127	-	1728	chr2	213363261	213364326	-	1065	1728	1065	0.23738	0	0	0.08815
mlclust_90	chr1	69487629	69490658	+	3029	chr2	213777621	213779660	+	2039	3029	2039	0.19534	129	0.029823	0
mlclust_91	chr1	71149066	71149981	+	915	chr2	215673829	215675170	+	1341	915	1341	0.18883	90	1.92814	0.136237
mlclust_92	chr1	71699912	71703819	+	3907	chr2	216300977	216305327	+	4350	430	404	0.03118	99	6.13498	0.323009
mlclust_93	chr1	71889663	71893184	-	3521	chr2	216486921	216490207	-	3286	3521	3286	0.03452	0	0.008861	0.020643
mlclust_94	chr1	72005571	72051769	-	46198	chr2	216604214	216651023	-	46809	1093	942	0.0742	198	4.05489	0.312637
mlclust_95	chr1	72153728	72168575	-	14847	chr2	216768850	216783376	-	14526	2047	2181	0.03169	0	0.033832	0.113683
mlclust_96	chr1	72603122	72604765	+	1643	chr2	217252909	217255826	+	2917	1643	2917	0.27939	0	0.039269	0.022989
mlclust_97	chr1	72998105	73007478	+	9373						1936	23121	0.84547	0	0.139646
mlclust_98	chr1	73062609	73072075	+	9466	chr2	217724928	217736362	+	11434	539	568	0.0262	252	0.107019	80.3421
mlclust_99	chr1	73253463	73255997	-	2534	chr2	217946609	217948762	-	2153	2532	2152	0.08113	0	0.097434	0.023371
mlclust_100	chr1	73568670	73572034	-	3364	chr2	218285082	218288817	-	3735	3364	3735	0.05226	0	0.010488	0.014496
mlclust_101	chr1	73664661	73911040	-	246379	chr2	218374985	218621982	-	246997	2444	4527	0.29881	114	4.41969	0.932454
mlclust_102	chr1	73956817	73957939	-	1122	chr2	218664525	218665800	-	1275	1122	1275	0.06383	0	0.137424	238.949
mlclust_103	chr1	74482086	74485498	-	3412	chr2	219314976	219319184	-	4208	3412	4208	0.10446	159	1.15687	4.48734
mlclust_104	chr1	74903389	74904306	+	917	chr2	219826276	219827231	+	955	916	954	0.02032	0	0.032347	1.24768
mlclust_105	chr1	75000825	75002415	+	1590	chr2	219928406	219929270	+	864	1590	864	0.29584	0	0.055905	0.431
mlclust_106	chr1	75364786	75371587	-	6801	chr2	220292242	220299261	-	7019	671	588	0.06593	249	0.343495	28.1494
mlclust_107	chr1	76485707	76498019	+	12312	chr2	221373333	221385313	+	11980	1604	607	0.45093	126	0.126413	0.490577
mlclust_108	chr1	80221618	80225367	+	3749	chr2	225281677	225297407	+	15730	1460	7969	0.69032	126	0.142303	0.01619
mlclust_109	chr1	80262184	80263336	-	1152	chr2	225337464	225338569	-	1105	1152	1105	0.02082	0	0.051441	5.17352
mlclust_110	chr1	80725383	80727239	-	1856	chr2	225875351	225876510	-	1159	1856	1159	0.23118	90	0.017381	0.072324
mlclust_111	chr1	82229679	82233943	-	4264	chr2	227596115	227600728	-	4613	4264	4613	0.03932	0	0.013876	8.85541
mlclust_112	chr1	82445003	82446218	-	1215	chr2	227867367	227868832	-	1465	1215	1465	0.09328	0	0.232315	8.7989
mlclust_113	chr1	82718345	82721722	-	3377	chr2	228179218	228190223	-	11005	3374	10958	0.52917	0	0.66179	0.389657
mlclust_114	chr1	82903478	82907429	+	3951	chr2	228451125	228452635	+	1510	3951	1510	0.44699	0	0.008165	0.017284
mlclust_115	chr1	83840176	83908219	-	68043	chr2	229684042	229750053	-	66011	1508	2662	0.27674	123	0.383882	0.163086
mlclust_116	chr1	88241430	88243833	-	2403						2403			0	0.066664
mlclust_117	chr1	88331265	88332611	+	1346	chr2	232469674	232471064	+	1390	1345	1389	0.01609	0	0.044775	0.216083
mlclust_118	chr1	88976745	88992993	+	16248	chr2	233271359	233274587	-	3228	885			171	106.327
mlclust_119	chr1	89350281	89352509	+	2228	chr2	233725999	233726762	+	763	2227	763	0.48963	0	0	0.403905
mlclust_120	chr1	89761647	89762491	+	844						844			0	1.19603
mlclust_121	chr1	90448091	90458497	+	10406	chr2	235186700	235196702	+	10002	2378	1995	0.08758	144	0.134729	0.109942
mlclust_122	chr1	90651464	90652308	+	844						476			276	0
mlclust_123	chr1	90912687	90918785	+	6098	chr2	235784746	235790189	+	5443	602	368	0.24124	0	0.183165	0.294249
mlclust_124	chr1	91785854	91786545	+	691	chr2	237033184	237033889	+	705	691	705	0.01003	0	0.051061	14.9098
mlclust_125	chr1	91791212	91794192	+	2980	chr2	237039773	237040622	+	849	2980	849	0.55654	0	0.019886	12.5389
mlclust_126	chr1	91826835	91829865	+	3030	chr2	237076119	237079201	+	3082	3030	3082	0.00851	381	0.100076	0.008468
mlclust_127	chr1	92050202	92056037	+	5835	chr2	237417033	237424467	+	7434	1009	535	0.30699	0	0.053428	0.121958
mlclust_128	chr1	92177032	92180487	+	3455	chr2	237586197	237590160	+	3963	1001	1124	0.05788	126	0.304384	0
mlclust_129	chr1	92655213	92657064	+	1851	chr2	238230410	238230847	+	437	1851	437	0.61801	141	0.287679	0.032461
mlclust_130	chr1	93301455	93302606	-	1151	chr2	239135747	239136553	-	806	547	403	0.15158	0	0	1.1981
mlclust_131	chr1	93695104	93699514	-	4410	chr2	239753790	239758260	-	4470	4410	4470	0.00676	135	1.18786	0.989062
mlclust_132	chr1	93812836	93816128	+	3292	chr2	239941896	239946856	+	4960	3290	4960	0.20242	0	0.058831	0
mlclust_133	chr1	94468950	94469326	-	376						376			0	0
mlclust_134	chr1	94717534	94734473	-	16939	chr2	241368154	241382694	-	14540	1049	354	0.49537	144	2.74649	2.28523
mlclust_135	chr1	94912042	94914798	-	2756	chr2	241653189	241656539	-	3350	2756	3350	0.09728	0	0.01956	56.1089
mlclust_136	chr1	95911626	95913724	+	2098						2097			0	0.025464
mlclust_137	chr1	97479626	97481937	-	2311	chr5	100139700	100140122	-	422	2310	421	0.69169	90	0.01335	0.246416
mlclust_138	chr1	97597760	97613095	-	15335	chr5	100284351	100303734	-	19383	761			153	0.28366
mlclust_139	chr1	98768797	98777807	+	9010	chr5	101632072	101645930	+	13858	3843	2733	0.1688	0	0.009181	0.088713
mlclust_140	chr1	99440840	99442025	-	1185	chr5	102722488	102724003	+	1515	1185	1515	0.12222	0	0	0
mlclust_141	chr1	99502894	99505201	-	2307						2307			0	0.013052
mlclust_142	chr1	100028043	100041232	+	13189	chr5	102056427	102067371	-	10944	1686	2244	0.14198	156	0.240956	0.081414
mlclust_143	chr1	101739681	101742782	+	3101	chr2	124877988	124879839	+	1851	3101	1851	0.25242	186	0	0
mlclust_144	chr1	101744560	101747269	+	2709	chr2	124891214	124892317	+	1103	2708	1102	0.42152	0	0.013029	0.076065
mlclust_145	chr1	103052385	103071723	+	19338						789			0	3.38871
mlclust_146	chr1	105620921	105623810	+	2889						2887			111	0.035982
mlclust_147	chr1	107173491	107174808	-	1317	chr18	59475298	59476719	-	1421	1317	1421	0.03798	0	0.02679	24.4652
mlclust_148	chr1	107252583	107258207	+	5624	chr18	59561017	59567383	+	6366	1285	1370	0.03202	0	0.299757	0.137645
mlclust_149	chr1	110313653	110316409	+	2756	chr18	62314415	62316784	+	2369	2754	2369	0.07515	0	0.012811	0
mlclust_150	chr1	113040991	113044019	-	3028						3027			0	0.070562
mlclust_151	chr1	115787961	115860711	-	72750	chr2	122903878	122951628	-	47750	1005			156	6.4086
mlclust_152	chr1	117565564	117581196	-	15632	chr2	124772779	124782742	-	9963	1342	266	0.66915	93	0.151092	0.315124
mlclust_153	chr1	120951046	120952912	+	1866	chr2	121491537	121492815	-	1278	1866	1278	0.18702	0	0.032274	0.040382
mlclust_154	chr1	120955045	120956421	+	1376						1376			0	0.465676
mlclust_155	chr1	121416669	121422936	-	6267	chr2	120980794	120986361	+	5567	604	180	0.54082	300	1.32746	1.94514
mlclust_156	chr1	121441609	121443931	-	2322	chr2	120934501	120936694	+	2193	2321	2193	0.02836	90	0.283847	11.9904
mlclust_157	chr1	121549046	121551040	-	1994	chr2	120740383	120742471	+	2088	1992	2086	0.02305	111	0.029749	3.24684
mlclust_158	chr1	121799706	121803474	+	3768	chr2	120446680	120449319	-	2639	775	26	0.93508	111	0.572573	14.5057
mlclust_159	chr1	122332381	122335034	+	2653	chr2	119816937	119823944	-	7007	1379	1255	0.04708	225	0	0.05199
mlclust_160	chr1	122518316	122586980	+	68664	chr2	119516360	119586890	-	70530	1133	571	0.32981	117	0.448204	1.68932
mlclust_161	chr1	122983981	123017533	+	33552	chr2	119040219	119076928	-	36709	1561	810	0.31674	123	0.173193	0.087564
mlclust_162	chr1	123196713	123197408	-	695						695			102	0
mlclust_163	chr1	123251692	123256477	-	4785	chr2	118831382	118832834	+	1452	1741	808	0.36603	114	0.102381	0.052612
mlclust_164	chr1	123603091	123603840	+	749						749			171	0
mlclust_165	chr1	124101721	124148757	+	47036	chr2	117844364	117897668	-	53304	1609	822	0.32374	0	0.065785	0.063501
mlclust_166	chr1	126272154	126275819	-	3665	chr2	115609129	115612408	+	3279	3665	3279	0.05559	0	0.009448	0.035789
mlclust_167	chr1	128412009	128413189	-	1180	chr2	134046155	134049657	-	3502	1180	3502	0.49594	0	0	0.034616
mlclust_168	chr1	128768779	128773166	-	4387	chr2	134482606	134490522	-	7916	387	172	0.38462	0	5.51912	1.40351
mlclust_169	chr1	129844643	129846808	-	2165						2163			0	0.240132
mlclust_170	chr1	132319400	132334491	+	15091	chr1	207488172	207492961	-	4789	2438	430	0.70014	195	8.45083	0.775665
mlclust_171	chr1	133182644	133184747	+	2103	chr1	206635997	206638149	-	2152	2103	2152	0.01152	0	12.3563	2.64134
mlclust_172	chr1	133831952	133832897	+	945	chr1	205682321	205683300	-	979	945	979	0.01767	0	0.032633	101.473
mlclust_173	chr1	133901164	133904586	-	3422	chr1	205600689	205602396	+	1707	3420	1337	0.43788	0	0.245245	2.78169
mlclust_174	chr1	133975552	133976392	+	840						840			0	0.042003
mlclust_175	chr1	134000463	134005200	+	4737						4734	509	0.80584	129	0.058231
mlclust_176	chr1	134097539	134102360	+	4821	chr1	205408326	205414274	-	5948	1585	1975	0.10955	99	0	0.459178
mlclust_177	chr1	134858229	134869291	-	11062	chr1	204544827	204558235	+	13408	2028	1171	0.2679	0	0.043831	2.43489
mlclust_178	chr1	135025252	135028359	-	3107	chr1	204380503	204383731	+	3228	3107	3228	0.0191	0	0.746274	0.620475
mlclust_179	chr1	135506987	135510999	+	4012						746	803	0.0368	0	0.406475
mlclust_180	chr1	135516447	135517937	-	1490	chr1	203821698	203823246	+	1548	1490	1548	0.01909	0	0.039709	16.8964
mlclust_181	chr1	135599256	135601738	-	2482	chr1	203710686	203713207	+	2521	2480	2519	0.0078	0	0.17225	74.6183
mlclust_182	chr1	135671786	135674998	-	3212	chr1	203618739	203628301	+	9562	3212	9562	0.4971	0	0.07905	0.851911
mlclust_183	chr1	136351068	136352050	-	982	chr1	202896432	202898431	+	1999	982	1999	0.34116	0	0.084215	0.019461
mlclust_184	chr1	137278893	137280590	-	1697	chr1	201847115	201849731	+	2616	1697	2616	0.21308	123	0.020791	3.0579
mlclust_185	chr1	137676010	137681677	+	5667	chr1	201414168	201419806	-	5638	2153	2891	0.14631	0	0.065551	0.03425
mlclust_186	chr1	138022754	138027760	-	5006	chr1	200993047	200997919	+	4872	2049	2089	0.00967	0	0.202794	0.462263
mlclust_187	chr1	138499609	138502045	-	2436	chr1	200411950	200413680	+	1730	1557	1307	0.08729	0	0.655078	0
mlclust_188	chr1	139831911	139833923	+	2012	chr1	198862938	198865230	-	2292	2010	2291	0.06533	0	0.13283	0.029541
mlclust_189	chr1	139848154	139851220	+	3066	chr1	198843867	198847901	-	4034	3066	4034	0.13634	0	0	0.09974
mlclust_190	chr1	139854401	139857204	+	2803	chr1	198834057	198836934	-	2877	2803	2877	0.01303	0	0	0.034963
mlclust_191	chr1	139863107	139866430	+	3323	chr1	198820431	198828196	-	7765	3323	7765	0.40061	0	0.03561	0.023749
mlclust_192	chr1	139867750	139868892	+	1142	chr1	198819301	198819512	-	211	1142	211	0.6881	93	0.030321	0.079453
mlclust_193	chr1	140086792	140088670	-	1878	chr1	198590501	198592692	+	2191	617	624	0.00564	0	0.09349	0
mlclust_194	chr1	140158224	140158638	+	414	chr1	198518944	198519373	-	429	414	429	0.01779	0	0	0
mlclust_195	chr1	140536671	140578652	-	41981	chr1	198071919	198113168	+	41249	1930	1077	0.28367	123	0.210493	0.084816
mlclust_196	chr1	140772850	140773527	-	677	chr1	197867537	197867983	+	446	408	370	0.04884	0	0	0.034671
mlclust_197	chr1	141070286	141072615	+	2329	chr1	197473882	197476318	-	2436	2329	2436	0.02246	0	0	2.67731
mlclust_198	chr1	141276028	141299429	+	23401	chr1	197195549	197236515	-	40966	1111	664	0.25183	123	0.062335	0.47971
mlclust_199	chr1	141346175	141349579	+	3404	chr1	197122810	197126503	-	3693	3404	3693	0.04072	0	0.018332	4.24449
mlclust_200	chr1	145446094	145448169	-	2075	chr1	193228379	193230943	+	2564	2075	2564	0.10541	0	0.017004	1.38615
mlclust_201	chr1	148274027	148342171	-	68144	chr1	190447629	190498697	+	51068	592	227	0.44567	0	0.811786	5.24356
mlclust_202	chr1	151257852	151259309	-	1457	chr1	187296952	187298800	+	1848	1457	1848	0.11831	0	0	0.030704
mlclust_203	chr1	151268111	151297080	-	28969	chr1	187276513	187294579	+	18066	1491	834	0.28258	0	0.34558	0.10829
mlclust_204	chr1	151935182	151947004	-	11822	chr1	186649769	186661260	+	11491	1831	1219	0.20066	177	0.642994	0.355369
mlclust_205	chr1	153596079	153597128	-	1049	chr1	184731059	184731531	+	472	1039	465	0.38165	0	0.067917	0
mlclust_206	chr1	153733349	153735080	-	1731	chr1	184594350	184596217	+	1867	1731	1867	0.0378	0	0	3.8997
mlclust_207	chr1	153737978	153738825	-	847	chr1	184590249	184591163	+	914	847	914	0.03805	0	0	7.44787
mlclust_208	chr1	154531155	154534631	-	3476	chr1	183700314	183702047	+	1733	1133	726	0.21893	165	0.062282	0
mlclust_209	chr1	154750587	154752359	+	1772	chr1	183439277	183440870	-	1593	1770	1584	0.05546	90	0.200831	0.543732
mlclust_210	chr1	155253377	155254917	-	1540						540			99	0.571071
mlclust_211	chr1	155561783	155563699	+	1916	chr1	182593922	182594600	-	678	1915	678	0.47705	204	0.014948	0
mlclust_212	chr1	155568369	155584959	-	16590	chr1	182575342	182588843	+	13501	3337	495	0.74165	0	0.088792	2.60991
mlclust_213	chr1	155744244	155745248	-	1004	chr1	182362766	182363558	+	792	1003	791	0.11817	0	0.05063	0.156473
mlclust_214	chr1	156088650	156104036	-	15386	chr1	181954945	181963028	+	8083	613	548	0.05599	117	0.522651	0.048946
mlclust_215	chr1	156729295	156731154	-	1859	chr1	181287175	181288881	+	1706	1859	1706	0.04292	144	0.028724	0.015791
mlclust_216	chr1	157545168	157547362	-	2194	chr1	180245822	180248112	+	2290	2193	2289	0.02142	156	0.054044	0.358953
mlclust_217	chr1	157817107	157819941	-	2834	chr1	179924324	179927449	+	3125	2834	3125	0.04883	0	0.033028	0.075165
mlclust_218	chr1	157915080	157915985	+	905	chr1	179809059	179811878	-	2819	905	2819	0.51396	0	0.295014	8.70116
mlclust_219	chr1	158233626	158235090	+	1464	chr1	179554627	179560884	-	6257	1464	6257	0.62077	0	0.109421	0.502628
mlclust_220	chr1	158337121	158339155	+	2034						684			0	0.103166
mlclust_221	chr1	158513238	158516179	+	2941	chr1	179161923	179163667	-	1744	2941	1744	0.2555	0	0.009733	0.162676
mlclust_222	chr1	158734298	158735446	-	1148	chr1	178889684	178890973	+	1289	1148	1289	0.05786	0	0.031053	6.67998
mlclust_223	chr1	159068436	159070809	-	2373	chr1	178442398	178444937	+	2539	2372	2538	0.03381	0	0.041662	4.62897
mlclust_224	chr1	162143824	162144947	+	1123	chr1	174967777	174968085	-	308	1123	308	0.56953	0	0.030093	0.889743
mlclust_225	chr1	162933054	162934552	-	1498	chr1	173871245	173872685	+	1440	1496	1440	0.01907	0	4.337	2.50347
mlclust_226	chr1	163643835	163644958	+	1123	chr1	172732197	172733182	-	985	1123	985	0.06546	153	0.024547	0
mlclust_227	chr1	164797208	164799687	+	2479	chr1	171213102	171217170	-	4068	2479	4068	0.24271	0	0.273229	0.013948
mlclust_228	chr1	165856589	165859494	-	2905	chr1	169866404	169868867	+	2463	2904	2463	0.08217	93	0.039429	0
mlclust_229	chr1	166078722	166082121	-	3399	chr1	169555596	169559324	+	3728	998	1103	0.04998	201	3.37078	13.9924
mlclust_230	chr1	166433437	166445013	+	11576	chr1	169014119	169029721	-	15602	2025	1947	0.01964	108	0.085499	0.083017
mlclust_231	chr1	166507564	166508684	+	1120	chr1	168939531	168940608	-	1077	1120	1077	0.01957	0	0.286058	0.095407
mlclust_232	chr1	166891051	166892955	+	1904	chr1	168500530	168504291	-	3761	681	2099	0.51007	90	0	0.020274
mlclust_233	chr1	166994154	167022061	-	27907	chr1	168356585	168380143	+	23558	3611	4848	0.14623	93	0.046794	0.067294
mlclust_234	chr1	167801621	167803743	-	2122	chr1	167387203	167389837	+	2634	2122	2634	0.10765	0	0.097909	1.05506
mlclust_235	chr1	167802183	167805411	+	3228	chr1	167385486	167388869	-	3383	3227	3382	0.02345	0	3.47116	1.95063
mlclust_236	chr1	168242792	168246954	+	4162	chr1	166882442	166886499	-	4057	4162	4057	0.01278	90	0.072348	3.4192
mlclust_237	chr1	168928523	168930972	-	2449	chr1	166136196	166138817	+	2621	1529	2033	0.14149	0	0.042196	0.031589
mlclust_238	chr1	169302101	169302413	-	312	chr1	165624965	165625412	+	447	312	447	0.17787	0	0.108315	2.85499
mlclust_239	chr1	169396148	169398143	+	1995	chr1	165512214	165514230	-	2016	1994	2015	0.00524	0	0.139188	0.88724
mlclust_240	chr1	171902410	171905564	-	3154	chr1	162752841	162756390	+	3549	3154	3549	0.05893	105	0.215102	41.9139
mlclust_241	chr1	172105310	172106446	+	1136	chr1	162527223	162531009	-	3786	1136	3786	0.5384	0	0.029749	0.051702
mlclust_242	chr1	172123563	172126772	-	3209	chr1	162495981	162499391	+	3410	3209	3410	0.03037	0	0.010995	25.5391
mlclust_243	chr1	172519738	172520596	+	858	chr1	162038864	162039732	-	868	858	868	0.00579	0	0.691134	0.03126
mlclust_244	chr1	172634587	172637444	-	2857	chr1	161931477	161934100	+	2623	2857	2623	0.0427	0	0.017774	6.82729
mlclust_245	chr1	173353315	173367449	-	14134	chr1	160991194	161003817	+	12623	954	94	0.82061	111	3.03853	32.9713
mlclust_246	chr1	173931091	173932524	-	1433	chr1	160397119	160398458	+	1339	1433	1339	0.03391	0	0.111788	3.95058
mlclust_247	chr1	174305102	174306494	-	1392	chr1	160001855	160003744	+	1889	1392	1889	0.15148	0	0.048555	0.079874
mlclust_248	chr1	174628186	174763160	+	134974						1892	1720	0.04762	141	0.640631
mlclust_249	chr1	175349998	175350606	-	608	chr1	159082463	159083194	+	731	608	731	0.09186	0	0.09905	0.038811
mlclust_250	chr1	176992087	176995042	-	2955	chr1	240943120	240948810	-	5690	2955	5690	0.31637	0	0.289123	0.050088
mlclust_251	chr1	177504439	177508546	+	4107	chr1	241625832	241632126	+	6294	943	239	0.5956	126	0.228668	0.701448
mlclust_252	chr1	178702860	178708389	-	5529	chr1	243352304	243359994	-	7690	5517	5906	0.03405	0	0.00559	0.31792
mlclust_253	chr1	179359177	179373401	-	14224	chr1	244200671	244213157	-	12486	1219	1205	0.00578	0	1.46991	0.624168
mlclust_254	chr1	179565837	179567068	-	1231	chr1	244391137	244391956	-	819	1231	819	0.20098	0	0	0
mlclust_255	chr1	180243458	180248680	-	5222	chr1	244996520	244998269	-	1749	2558	1068	0.41092	270	0.168596	0.549841
mlclust_256	chr1	180256867	180259121	-	2254	chr1	245015606	245017388	-	1782	2253	1781	0.11701	0	0.210421	35.7046
mlclust_257	chr1	180662837	180664121	+	1284	chr1	245604490	245605815	+	1325	1284	1325	0.01571	0	0.023451	0.059092
mlclust_258	chr1	180880313	180882491	-	2178						2178			0	0.027208
mlclust_259	chr1	182354642	182354929	+	287	chr1	226819391	226819694	-	303	287	303	0.02712	0	0.530817	29.5456
mlclust_260	chr1	182685968	182689019	+	3051						1751	453	0.58893	96	0.182973
mlclust_261	chr1	182707972	182709037	+	1065	chr1	226297096	226298375	-	1279	1060	1270	0.09013	0	0.10075	0.01117
mlclust_262	chr1	182822231	182824167	-	1936	chr1	226127801	226129887	+	2086	1936	2086	0.03729	363	2.83072	0.535025
mlclust_263	chr1	183017272	183020178	-	2906	chr1	224413796	224415204	-	1408	2906	1408	0.34724	0	0.029552	0.248669
mlclust_264	chr1	183074387	183075908	+	1521						1521			0	0.037924
mlclust_265	chr1	183096985	183099115	+	2130	chr1	224564006	224567143	+	3137	2130	3137	0.19119	0	0.055643	2.97296
mlclust_266	chr1	184218245	184233418	+	15173						2463	454	0.68872	153	1.67897
mlclust_267	chr1	185834545	185836171	+	1626						1608			0	0.021534
mlclust_268	chr1	186266858	186267611	+	753	chr1	221386055	221386894	-	839	753	839	0.05402	90	0.040953	0.079924
mlclust_269	chr1	186536375	186542868	+	6493	chr1	221067245	221076675	-	9430	1721	1509	0.06563	0	0.020501	0.059582
mlclust_270	chr1	186909980	186915198	+	5218	chr1	220595264	220601347	-	6083	1386	817	0.25828	0	0.024383	0
mlclust_271	chr1	187051126	187053216	+	2090	chr1	220396161	220399616	-	3455	2090	3455	0.24617	93	0.223926	0.048708
mlclust_272	chr1	188006135	188006623	-	488	chr1	219240613	219241020	+	407	488	407	0.0905	0	0.437684	0
mlclust_273	chr1	188573274	188576800	+	3526	chr1	218454985	218458553	-	3568	1269	1191	0.03171	0	0.020869	0.045459
mlclust_274	chr1	188750811	188753991	+	3180	chr1	218199285	218204064	-	4779	1460	2460	0.2551	150	0	0
mlclust_275	chr1	188788406	188791482	-	3076						3076			0	0.009789
mlclust_276	chr1	188866591	188868167	-	1576	chr1	218040630	218046767	+	6137	1575	717	0.37435	147	0.135613	1.75338
mlclust_277	chr1	189653741	189654357	+	616	chr1	217068714	217069479	-	765	616	765	0.10789	0	0.056213	0
mlclust_278	chr1	190888773	190890312	+	1539	chr1	215634171	215635274	-	1103	1539	1103	0.16503	123	0.020038	0
mlclust_279	chr1	191994174	192041155	+	46981	chr1	214117811	214161798	-	43987	828	858	0.01779	0	2.6754	1.86581
mlclust_280	chr1	192227526	192241024	+	13498	chr1	213902645	213918183	-	15538	1131	92	0.84955	105	0.188851	0.364448
mlclust_281	chr1	192849229	192853660	+	4431	chr1	213030192	213032559	-	2367	1649	2367	0.17878	180	0.392299	0.470684
mlclust_282	chr1	193048352	193049565	+	1213	chr1	212732151	212732334	-	183	547	74	0.76167	0	0.140454	2.74367
mlclust_283	chr1	193359763	193360771	-	1008						1008			0	0.035003
mlclust_284	chr1	193606487	193608132	+	1645	chr1	211916799	211918681	-	1882	1645	1882	0.0672	0	0.042897	13.5918
mlclust_285	chr1	193641274	193643082	+	1808	chr1	211851200	211854480	-	3280	851	284	0.49956	0	0.082921	1.47037
mlclust_286	chr1	193922653	193924516	-	1863	chr1	211487319	211489357	+	2038	1863	2038	0.04486	0	0.016553	11.7697
mlclust_287	chr1	195033892	195035132	+	1240						1238			0	0
mlclust_288	chr1	195107464	195110037	+	2573						2573			0	0.011209
mlclust_289	chr1	195115960	195117082	-	1122	chr1	209835811	209836724	+	913	246	248	0.00405	0	0.206429	8.82154
mlclust_290	chr1	195333433	195335997	-	2564	chr1	209602889	209605888	+	2999	1728	2003	0.07371	132	0.034851	2.75158
mlclust_291	chr1	196444411	196447061	-	2650	chr1	208416434	208419217	+	2783	2643	2776	0.02454	0	0.588172	0.362348
mlclust_292	chr1	196843592	196864099	+	20507	chr1	207974868	207997116	-	22248	5380	6161	0.06767	141	0.251838	1.46666
mlclust_293	chr1	196863022	196865102	-	2080	chr1	207973462	207976167	+	2705	2080	2705	0.13062	0	5.25645	1.22496
mlclust_294	chr10	6577657	6581536	-	3879	chr6	150945635	150948743	+	3108	3879	3108	0.11035	0	0.009096	0.095847
mlclust_295	chr10	6596879	6599629	-	2750	chr6	150927555	150930022	+	2467	2750	2467	0.05425	0	0.010024	0.345002
mlclust_296	chr10	6979405	6982468	+	3063	chr6	150461307	150464796	-	3489	1536	1615	0.02507	132	1.53903	0.722468
mlclust_297	chr10	7383168	7384421	+	1253	chr6	150069500	150070796	-	1296	1253	1296	0.01687	90	0.623841	0.040276
mlclust_298	chr10	7399736	7400837	-	1101	chr6	150039383	150040079	+	696	1101	696	0.22538	0	0.175263	0.460787
mlclust_299	chr10	7433807	7436621	+	2814	chr6	149979272	149982064	-	2792	2814	2792	0.00392	0	0.012538	6.8047
mlclust_300	chr10	7511187	7512622	-	1435	chr6	149867270	149867420	+	150	1435	150	0.81073	0	0.871352	0
mlclust_301	chr10	8662761	8665101	-	2340	chr6	148593399	148596479	+	3080	2336	3076	0.13673	135	0.148	0.032247
mlclust_302	chr10	8889584	8892601	-	3017	chr6	148355540	148356198	+	658	3017	658	0.6419	0	0.057387	0.061146
mlclust_303	chr10	9018743	9020386	+	1643	chr6	148228985	148231030	-	2045	1643	2045	0.109	0	0.3575	0.042366
mlclust_304	chr10	9202726	9207000	-	4274	chr6	148044710	148051806	+	7096	4274	7096	0.2482	0	0.01409	0.146161
mlclust_305	chr10	9266043	9267319	-	1276	chr6	147973039	147974368	+	1329	1276	1329	0.02035	0	0.112169	0
mlclust_306	chr10	9342744	9344647	-	1903	chr6	147889382	147891157	+	1775	1903	1775	0.0348	0	0.018541	11.6408
mlclust_307	chr10	9475348	9476793	-	1445	chr6	147710035	147711601	+	1566	1444	1565	0.04021	0	0.037333	7.24146
mlclust_308	chr10	9737176	9741204	+	4028	chr6	147425232	147428542	-	3310	4028	3310	0.09785	0	0.05141	0.008562
mlclust_309	chr10	10964587	11000797	-	36210	chr6	146136353	146166428	+	30075	1613	1878	0.07591	0	1.59563	0.599737
mlclust_310	chr10	11021896	11023877	+	1981	chr6	146115387	146117118	-	1731	1978	1731	0.06659	0	0.014581	2.15868
mlclust_311	chr10	12099645	12100133	-	488						488			0	0.997203
mlclust_312	chr10	12636445	12642898	-	6453	chr6	144537160	144544963	+	7803	1153	2732	0.40644	0	0.27029	0.174117
mlclust_313	chr10	12725148	12728858	-	3710	chr6	144416142	144424348	+	8206	3702	7483	0.33804	0	2.62722	1.92046
mlclust_314	chr10	12927522	12929693	-	2171	chr6	144149636	144151966	+	2330	2164	2323	0.03544	0	0.988426	10.3333
mlclust_315	chr10	13591085	13599014	+	7929	chr6	143363720	143378981	-	15261	633	10782	0.88909	0	0.055739	0.06064
mlclust_316	chr10	13647003	13648770	-	1767	chr6	143292820	143306459	+	13639	1767	13639	0.77061	0	0.019125	0.009833
mlclust_317	chr10	13685579	13685781	+	202	chr6	143267320	143267515	-	195	202	195	0.01763	0	0.159699	0.290671
mlclust_318	chr10	13692241	13695040	+	2799	chr6	143257745	143260616	-	2871	2799	2871	0.0127	0	0.024742	0.251986
mlclust_319	chr10	13699397	13701985	+	2588	chr6	143248892	143252198	-	3306	2588	3306	0.12182	0	0.012728	0.110006
mlclust_320	chr10	13802643	13804173	+	1530	chr6	143142950	143143889	-	939	1530	939	0.23937	0	0.021084	0.096181
mlclust_321	chr10	13806466	13808627	+	2161	chr6	143137503	143138871	-	1368	2161	1368	0.22471	0	0.548642	0.16591
mlclust_322	chr10	14033713	14034539	-	826	chr6	142891101	142891960	+	859	826	859	0.01958	114	0	0
mlclust_323	chr10	15020155	15021518	+	1363	chr6	141882394	141884054	-	1660	1361	1331	0.01114	105	0	0
mlclust_324	chr10	15511582	15526871	+	15289						627			0	0.15435
mlclust_325	chr10	16670900	16815588	-	144688	chr6	140312455	140432838	+	120383	3400	2257	0.20205	93	0.356492	1.94307
mlclust_326	chr10	17510327	17515134	-	4807	chr6	139614568	139616751	+	2183	2946	652	0.63758	0	0.034475	0.119334
mlclust_327	chr10	18521132	18551736	-	30604						3162			90	1.04014
mlclust_328	chr10	18806335	18806984	-	649	chr6	138126993	138127721	+	728	305	288	0.02867	99	0	0
mlclust_329	chr10	19217606	19220378	-	2772						2770	210	0.85906	0	0.081521
mlclust_330	chr10	20906749	20908423	+	1674	chr6	135466998	135468913	-	1915	597	880	0.1916	0	0.058002	0
mlclust_331	chr10	24157367	24160960	+	3593	chr6	132456395	132461332	-	4937	3593	4937	0.15756	144	0.022506	0.044935
mlclust_332	chr10	24309110	24315618	-	6508	chr6	132272201	132280048	+	7847	1634	1706	0.02156	0	44.6727	1.08167
mlclust_333	chr10	25018414	25026238	+	7824	chr6	131449427	131451960	-	2533	2420	243	0.8175	267	0.230825	0.161106
mlclust_334	chr10	25247751	25256070	-	8319	chr6	131148452	131156421	+	7969	663	751	0.06223	126	0.188238	11.9047
mlclust_335	chr10	26430034	26431436	+	1402	chr6	130072860	130073928	-	1068	1399	1020	0.15668	0	0.32786	0
mlclust_336	chr10	28926069	28929095	+	3026	chr6	127783248	127786781	-	3533	3026	3533	0.0773	0	0	0.044323
mlclust_337	chr10	29915954	29920327	-	4373	chr6	126661411	126670916	+	9505	1353	1553	0.06882	123	0.051186	2.62168
mlclust_338	chr10	31219664	31221333	-	1669	chr6	125405242	125406995	+	1753	1665	1749	0.0246	0	0	3.14909
mlclust_339	chr10	31281549	31282635	-	1086	chr6	125330879	125331497	+	618	1086	618	0.27465	0	0.295014	0.207578
mlclust_340	chr10	32296902	32298173	-	1271	chr6	124386153	124388424	+	2271	1271	2271	0.28233	0	0.392767	0
mlclust_341	chr10	32358636	32359292	-	656	chr6	124354721	124356188	+	1467	656	1467	0.38201	0	0.217373	0
mlclust_342	chr10	32498905	32501594	-	2689	chr6	124211367	124211714	+	347	2688	347	0.77133	90	0.012882	0.096626
mlclust_343	chr10	32972523	32975337	-	2814	chr6	123761605	123764365	+	2760	2795	2760	0.0063	0	0	0.58796
mlclust_344	chr10	33186004	33188339	-	2335						2330	2721	0.07741	0	0.141375
mlclust_345	chr10	33344051	33382238	+	38187	chr6	123289909	123317784	-	27875	2111	1535	0.15798	102	0.208113	0.382255
mlclust_346	chr10	34015717	34018713	-	2996	chr6	116573738	116576831	+	3093	2777	2848	0.01262	0	12.5308	6.48099
mlclust_347	chr10	37057291	37099458	+	42167	chr6	113906854	113953554	-	46700	2600	2409	0.03813	0	0.148889	1.16202
mlclust_348	chr10	37779351	37783162	+	3811						1852			0	0.200722
mlclust_349	chr10	37895585	37901709	+	6124	chr6	113167836	113173135	-	5299	480	276	0.26984	0	0	0.236405
mlclust_350	chr10	38014879	38033652	-	18773	chr6	113042780	113083421	+	40641	711	142	0.66706	90	0.748936	3.40024
mlclust_351	chr10	38683794	38685918	-	2124	chr6	112575194	112577495	+	2301	2124	2301	0.04	174	4.69372	2.76992
mlclust_352	chr10	39330441	39332878	-	2437	chr6	111927241	111931574	+	4333	2437	4333	0.28006	0	0.024278	0.042075
mlclust_353	chr10	39377233	39378232	-	999	chr6	111875848	111876982	+	1134	999	1134	0.06329	0	0.207971	0.343059
mlclust_354	chr10	39398821	39451683	-	52862	chr6	111804695	111856921	+	52226	2674	173	0.87847	0	0.664386	42.556
mlclust_355	chr10	39980739	39981139	+	400						400			0	0
mlclust_356	chr10	41287821	41296282	+	8461	chr6	109640187	109651560	-	11373	617	372	0.24772	162	4.86068	1.01787
mlclust_357	chr10	41532190	41534878	+	2688	chr6	109409937	109414002	-	4065	2686	4063	0.20403	0	0.012264	0.237032
mlclust_358	chr10	41593972	41596436	+	2464						2463	330	0.76369	0	0.01171
mlclust_359	chr10	41809415	41810007	+	592	chr6	109088920	109089030	-	110	592	110	0.68661	0	0.055643	0
mlclust_360	chr10	41901651	41903095	-	1444	chr6	109004240	109005971	+	1731	1444	1731	0.09039	90	0.089361	36.9276
mlclust_361	chr10	41904909	41905282	-	373	chr6	109001869	109002264	+	395	373	395	0.02865	0	0	46.0644
mlclust_362	chr10	42574673	42576489	-	1816	chr6	108149265	108150146	+	881	1797	433	0.61166	153	0.019634	0
mlclust_363	chr10	42820885	42824004	-	3119	chr6	107879238	107882482	+	3244	3117	3242	0.01966	0	0.010842	0.099491
mlclust_364	chr10	42940026	42941188	-	1162	chr6	107780862	107781891	+	1029	1162	1029	0.0607	0	0.050998	0.177545
mlclust_365	chr10	43313204	43316534	+	3330						2481			0	0.064568
mlclust_366	chr10	43465963	43485642	+	19679	chr6	107178664	107194179	-	15515	1060	990	0.03415	273	0.266286	15.2519
mlclust_367	chr10	43546385	43553107	+	6722	chr6	107139371	107143049	-	3678	1059			180	0.655493
mlclust_368	chr10	44317694	44321980	-	4286	chr6	106348222	106351693	+	3471	4129	3471	0.08658	0	0.129323	0.00483
mlclust_369	chr10	44416985	44419737	+	2752	chr6	106244582	106247198	-	2616	2752	2616	0.02534	0	0.011206	0
mlclust_370	chr10	44786217	44786884	-	667	chr6	105851081	105852130	+	1049	667	1049	0.22261	0	0.052898	0.335612
mlclust_371	chr10	45527369	45529737	+	2368	chr6	105133246	105134806	-	1560	2368	1560	0.2057	135	0	0
mlclust_372	chr10	48813140	48816354	-	3214						3214			0	0
mlclust_373	chr10	49699839	49701687	-	1848	chr6	101746099	101749064	+	2965	1847	2047	0.05136	0	0.019301	0.006922
mlclust_374	chr10	50611220	50614339	-	3119	chr6	100912966	100916399	+	3433	3119	3433	0.04792	0	0.010835	0.004883
mlclust_375	chr10	52922829	52924121	-	1292						1292			105	0.052313
mlclust_376	chr10	53795727	53800887	+	5160	chr6	119671110	119676465	+	5355	1230	1123	0.04547	0	0.247275	0.468353
mlclust_377	chr10	55734103	55735837	-	1734	chr6	121399761	121401288	-	1527	1734	1527	0.06348	0	0.020348	0.589666
mlclust_378	chr10	56224306	56225093	+	787	chr12	117013772	117014402	+	630	787	630	0.1108	0	0	20.1532
mlclust_379	chr10	57198188	57206159	-	7971	chr6	122713266	122720756	-	7490	723	2384	0.5346	117	0.038128	0.071159
mlclust_380	chr10	58909733	58910989	-	1256	chr10	74646098	74647450	+	1352	1208	1339	0.05143	0	0.619876	8.45038
mlclust_381	chr10	59078811	59080164	+	1353	chr10	74450830	74452551	-	1721	1353	1721	0.11971	0	0.153296	0.041212
mlclust_382	chr10	59566092	59569636	-	3544	chr10	73847672	73851572	+	3900	3539	3829	0.03936	0	5.83555	1.91907
mlclust_383	chr10	60494050	60500828	+	6778	chr10	72698829	72700644	-	1815	1131	763	0.1943	0	0.63371	0
mlclust_384	chr10	61246044	61247568	+	1524	chr10	71811612	71813290	-	1678	1524	1678	0.04809	0	0.427051	0.154897
mlclust_385	chr10	61486151	61488363	+	2212	chr10	71516518	71518627	-	2109	2212	2109	0.02384	0	0.013613	0
mlclust_386	chr10	62065097	62066876	+	1779						1779			0	0.018996
mlclust_387	chr10	62267317	62269871	-	2554	chr10	70458542	70460551	+	2009	2554	2009	0.11944	126	0.013815	0.621271
mlclust_388	chr10	62479666	62481465	+	1799	chr10	70097795	70099322	-	1527	1799	1527	0.08178	123	5.71516	23.2287
mlclust_389	chr10	62801950	62803661	+	1711	chr10	69643510	69644239	-	729	1711	729	0.40246	132	0.037708	0.107404
mlclust_390	chr10	65583358	65586812	-	3454	chr10	66297626	66299937	+	2311	343	301	0.06522	0	0.467033	0
mlclust_391	chr10	66378383	66380487	-	2104	chr10	65474502	65476332	+	1830	388	53	0.75964	0	0.643156	0.802087
mlclust_392	chr10	66383649	66386347	+	2698	chr10	65470309	65472966	-	2657	1766	1885	0.03259	0	0.017667	0
mlclust_393	chr10	66574421	66575488	+	1067						1066			0	0.050091
mlclust_394	chr10	66640530	66644032	+	3502	chr10	65034965	65043673	-	8708	3501	8707	0.42644	0	0.075644	0.141739
mlclust_395	chr10	66947135	66948799	-	1664	chr10	64628073	64629419	+	1346	1664	1346	0.10565	153	0.030518	0.021055
mlclust_396	chr10	67031626	67034699	-	3073	chr10	64533531	64538060	+	4529	3073	4529	0.19153	132	0.055891	0.011395
mlclust_397	chr10	67171367	67180787	-	9420	chr10	64374377	64385570	+	11193	688	735	0.03303	0	0.155225	0.105322
mlclust_398	chr10	67425226	67436456	-	11230	chr10	64034886	64044597	+	9711	491	285	0.26546	0	0.143718	0.29832
mlclust_399	chr10	68366951	68367238	-	287	chr10	63042969	63043326	+	357	287	357	0.1087	96	0	0
mlclust_400	chr10	69654780	69655946	+	1166	chr10	61548522	61549708	-	1186	1163	1183	0.00853	0	0.174347	13.568
mlclust_401	chr10	70063880	70118711	-	54831	chr10	60867086	60934713	+	67627	1665	2158	0.12896	0	1.70494	4.91752
mlclust_402	chr10	70631484	70644788	-	13304	chr10	60236851	60266623	+	29772	2300	2987	0.12994	111	0.10363	0.113588
mlclust_403	chr10	70773492	70776725	+	3233						1527			0	0.022131
mlclust_404	chr10	70947056	70948266	-	1210						1209			138	0.024906
mlclust_405	chr10	72408310	72411029	+	2719	chr10	57606214	57606527	-	313	2589	313	0.78429	0	0.026106	0
mlclust_406	chr10	72986381	72988511	+	2130						2130			246	0.125346
mlclust_407	chr10	75298720	75300169	-	1449	chr22	24256245	24256532	+	287	1449	287	0.66935	0	0.255386	0.61012
mlclust_408	chr10	75323087	75324443	+	1356	chr22	24235802	24236185	-	383	1356	383	0.55952	0	0.021851	0.879215
mlclust_409	chr10	75383956	75385286	+	1330	chr22	24128493	24129537	-	1044	1330	1044	0.12047	90	2.78473	0.661215
mlclust_410	chr10	76400191	76402926	-	2735	chr21	47092590	47095848	+	3258	2734	2603	0.02455	0	0.058593	0.065395
mlclust_411	chr10	76978683	76979675	+	992						992			0	0.970291
mlclust_412	chr10	77899492	77900019	-	527	chr21	45181619	45182177	+	558	527	558	0.02857	0	0.061213	28.3998
mlclust_413	chr10	77932559	77934001	-	1442	chr21	45121639	45122907	-	1268	1442	1268	0.06421	0	0	0.158651
mlclust_414	chr10	78061866	78064619	+	2753	chr19	15202952	15203455	-	503	2753	503	0.69103	0	0.010763	0
mlclust_415	chr10	79620694	79621112	+	418	chr19	1258731	1259142	+	411	418	411	0.00844	0	0.849272	31.8221
mlclust_416	chr10	79863389	79864420	+	1031						1031			0	0.156863
mlclust_417	chr10	80024570	80026154	+	1584						1584			0	0.087442
mlclust_418	chr10	81589420	81591032	-	1612						1609			0	0.171326
mlclust_419	chr10	81778119	81779304	-	1185	chr2	27760263	27760620	+	357	1185	357	0.53696	210	0.045061	0.234799
mlclust_420	chr10	82111827	82113068	+	1241	chr12	104381222	104382642	+	1420	1241	1420	0.06727	171	0.708019	3.20886
mlclust_421	chr10	82274867	82286987	+	12120	chr12	104609652	104637665	+	28013	1054	336	0.51655	0	0.114275	2.2526
mlclust_422	chr10	83185642	83225506	+	39864	chr12	105724449	105765295	+	40846	1049	1213	0.0725	162	0.747648	21.1205
mlclust_423	chr10	83455472	83467585	-	12113	chr12	106062089	106080620	-	18531	2707	3586	0.13968	0	0.089542	0.0374
mlclust_424	chr10	83499304	83563442	-	64138	chr12	106115198	106195150	-	79952	2713	2852	0.02498	0	0.243332	0.219628
mlclust_425	chr10	83903593	83907119	+	3526	chr12	106532953	106537859	+	4906	3526	4906	0.16366	0	0.062544	0.306245
mlclust_426	chr10	83961618	83962371	+	753	chr12	106598600	106599277	+	677	753	677	0.05315	0	0.076031	0
mlclust_427	chr10	84502951	84503671	-	720						720			129	0.07053
mlclust_428	chr10	84847701	84851094	-	3393	chr12	107709815	107713723	-	3908	3390	3905	0.0706	0	0.201029	0.589252
mlclust_429	chr10	88337344	88338546	-	1202	chr12	101623496	101624981	+	1485	1200	1483	0.10548	0	0.025093	0.027444
mlclust_430	chr10	89149115	89163611	+	14496	chr12	100640778	100660843	-	20065	3027	325	0.80609	0	0.114215	4.33647
mlclust_431	chr10	89379106	89381359	+	2253	chr12	100332293	100334723	-	2430	2253	2430	0.0378	0	0.015	0.016111
mlclust_432	chr10	89554438	89558246	+	3808	chr12	100136179	100140385	-	4206	3804	4206	0.05019	0	0.014037	0.031887
mlclust_433	chr10	90433455	90436044	+	2589	chr12	99136781	99138694	-	1913	2589	1913	0.15016	0	0.052212	10.192
mlclust_434	chr10	90671240	90683364	-	12124	chr12	98837189	98861922	+	24733	659	1131	0.26369	108	0.367814	7.00615
mlclust_435	chr10	90964047	90965878	-	1831	chr12	98583954	98585746	+	1792	1831	1792	0.01076	0	0.029163	0
mlclust_436	chr10	91544490	91627915	-	83425	chr12	97856581	97948246	+	91665	8975	10031	0.05556	99	0.291529	8.60759
mlclust_437	chr10	92106835	92114479	+	7644	chr12	97381798	97388995	-	7197	2572	2746	0.03272	96	0.06859	0
mlclust_438	chr10	92798976	92811622	+	12646	chr12	96545078	96559190	-	14112	853	1169	0.15628	162	0.119066	0.20876
mlclust_439	chr10	94136449	94151319	-	14870	chr12	94853809	94868889	+	15080	3884	2193	0.27826	0	0.022886	1.45789
mlclust_440	chr10	94880008	94891274	+	11266	chr12	93956591	93964233	-	7642	1182	569	0.35009	246	0.606368	2.42621
mlclust_441	chr10	95143442	95143758	+	316						316			0	0.338442
mlclust_442	chr10	95506901	95507763	+	862	chr12	93166664	93167522	-	858	862	858	0.00233	216	0.066918	9.89455
mlclust_443	chr10	95688840	95711342	+	22502	chr12	92918809	92950291	-	31482	1207	1427	0.08352	108	8.47866	0.914475
mlclust_444	chr10	96082443	96085443	+	3000	chr12	92534063	92536703	-	2640	3000	2640	0.06383	0	0.053397	1.39167
mlclust_445	chr10	96197985	96347342	+	149357	chr12	92252521	92414244	-	161723	3678	3557	0.01672	0	0.175417	2.53637
mlclust_446	chr10	96498401	96523693	+	25292	chr12	92058963	92085870	-	26907	1015	771	0.13662	105	1.05065	0.224744
mlclust_447	chr10	97053617	97059565	-	5948	chr12	91461100	91467791	+	6691	1464	1006	0.18543	0	0.024351	0
mlclust_448	chr10	97177418	97181997	+	4579	chr12	91317757	91333293	-	15536	453	206	0.37481	0	0.476013	0.380084
mlclust_449	chr10	98382946	98387254	+	4308	chr12	90094469	90097550	-	3081	4305	3080	0.16588	0	0.25951	0.087507
mlclust_450	chr10	98388936	98392796	+	3860	chr12	90089195	90092547	-	3352	3860	3352	0.07044	99	0.019904	0.093363
mlclust_451	chr10	99101364	99104554	-	3190						2506	612	0.60744	0	0.028159
mlclust_452	chr10	100170168	100204269	-	34101	chr12	88242867	88262908	+	20041	1625	1242	0.13359	99	0.063927	0.010507
mlclust_453	chr10	101144120	101475856	+	331736	chr12	86827617	87232908	-	405291	1993	1946	0.01193	0	15.0125	0.697808
mlclust_454	chr10	101594626	101597062	+	2436	chr12	86677324	86678076	-	752	2436	752	0.52823	111	0.014484	0
mlclust_455	chr10	101878516	101880231	+	1715	chr12	86349929	86351466	-	1537	1715	1537	0.05474	0	0.034554	0.283591
mlclust_456	chr10	102526323	102528527	-	2204	chr12	85636200	85638388	+	2188	2204	2188	0.00364	0	0.023041	0.041041
mlclust_457	chr10	105903994	105908024	-	4030	chr12	82151805	82155651	+	3846	3879	3702	0.02335	0	0.437772	0.040757
mlclust_458	chr10	106370572	106373008	-	2436	chr12	81648926	81651359	+	2433	2436	2433	0.00062	0	0.083237	7.36047
mlclust_459	chr10	109085834	109086594	+	760	chr12	78637210	78638275	-	1065	760	1065	0.16712	0	0.044466	0
mlclust_460	chr10	109118315	109119788	-	1473	chr12	78605646	78607080	+	1434	1472	1434	0.01308	0	0	4.55942
mlclust_461	chr10	109327172	109328452	-	1280	chr12	78348606	78349792	+	1186	1280	1186	0.03812	90	0.250301	0.011948
mlclust_462	chr10	109816563	109818717	-	2154	chr12	77789351	77791291	+	1940	2152	1938	0.05232	129	0.015704	0.086836
mlclust_463	chr10	110037705	110053017	+	15312	chr12	77582810	77607168	-	24358	1303	1642	0.11511	144	0.350755	0.077669
mlclust_464	chr10	111023774	111031329	-	7555	chr12	76314031	76326370	+	12339	1144	229	0.66642	210	1.0595	0.367441
mlclust_465	chr10	112274807	112282863	+	8056	chr12	75041444	75044484	-	3040	1088	697	0.21905	111	0.155305	0
mlclust_466	chr10	112359093	112364513	-	5420	chr12	74933145	74937236	+	4091	5415	3914	0.1609	111	0.051157	12.0799
mlclust_467	chr10	114384942	114385478	+	536						536			0	0
mlclust_468	chr10	115824452	115826586	+	2134	chr12	70909653	70911465	-	1812	2132	1774	0.09165	0	0.031702	4.4114
mlclust_469	chr10	115910218	115912375	+	2157	chr12	70758121	70760884	-	2763	1986	2579	0.1299	0	2.35726	0.799553
mlclust_470	chr10	116160122	116166233	-	6111	chr12	70424808	70432446	+	7638	594	306	0.32	0	0.233179	0
mlclust_471	chr10	116166308	116176816	+	10508	chr12	70392588	70424726	-	32138	1227	1035	0.08488	0	0.477522	0.161977
mlclust_472	chr10	116387622	116400335	+	12713	chr12	70113902	70132496	-	18594	2139	1619	0.13837	0	0.730483	0.540037
mlclust_473	chr10	116615505	116618166	+	2661	chr12	69834117	69837120	-	3003	537	442	0.09704	0	0.060073	0.303432
mlclust_474	chr10	116661644	116662010	+	366						366			132	0.078212
mlclust_475	chr10	117122554	117124400	+	1846	chr12	69244959	69245873	-	914	1846	914	0.33768	0	0.080127	10.3098
mlclust_476	chr10	117274567	117276253	-	1686						1686			129	0
mlclust_477	chr10	117362514	117385363	+	22849	chr12	68883086	68905085	-	21999	1704	1719	0.00438	132	0.892455	0.060731
mlclust_478	chr10	118269643	118272162	-	2519						2519			0	0.014007
mlclust_479	chr10	118292660	118293990	-	1330	chr12	68055139	68056441	+	1302	1330	1302	0.01064	0	0.086649	9.00879
mlclust_480	chr10	118357436	118364199	-	6763	chr12	67982309	67990982	+	8673	2357	3865	0.24237	0	0.024473	0.020258
mlclust_481	chr10	118762163	118768918	+	6755	chr12	67582492	67589848	-	7356	584	578	0.00516	105	0.365736	0.022194
mlclust_482	chr10	118846934	118848278	-	1344	chr12	67502326	67503711	+	1385	1344	1385	0.01502	0	0.025145	0
mlclust_483	chr10	119060410	119064324	+	3914	chr12	67280267	67285020	-	4753	3914	4753	0.0968	0	0.009108	0.014109
mlclust_484	chr10	119091119	119093451	+	2332	chr12	67243176	67245020	-	1844	2332	1844	0.11686	96	0	0.036523
mlclust_485	chr10	119226964	119228188	+	1224	chr12	67102296	67102869	-	573	1224	573	0.36227	117	0.02829	0
mlclust_486	chr10	119277310	119278560	-	1250	chr12	67051086	67052222	+	1136	1250	1136	0.04778	0	0.270354	0
mlclust_487	chr10	119284230	119287695	-	3465	chr12	67041237	67044169	+	2932	1188	1089	0.04348	0	0.612596	0.049475
mlclust_488	chr10	119638667	119640264	+	1597	chr12	66580948	66582904	-	1956	593	236	0.43064	147	0.149661	0
mlclust_489	chr10	120070078	120072972	-	2894	chr12	66026038	66030782	+	4744	1514	3295	0.37035	0	0.335413	0.00407
mlclust_490	chr10	120388903	120390189	-	1286	chr12	65603686	65605205	+	1519	1282	1515	0.0833	0	0.082565	0.221315
mlclust_491	chr10	120636196	120639705	-	3509	chr12	65343334	65347692	+	4358	1986	1876	0.02848	0	0.026887	0.062555
mlclust_492	chr10	120787883	120788700	+	817	chr12	65173900	65175083	-	1183	817	1183	0.183	0	0.129558	0.386082
mlclust_493	chr10	120947392	120949135	+	1743	chr12	64958880	64960885	-	2005	1743	2005	0.0699	0	0.016547	0.03359
mlclust_494	chr10	121024440	121026318	-	1878	chr12	64843385	64844896	+	1511	1878	1511	0.10829	0	0.055315	6.40142
mlclust_495	chr10	121077860	121078935	-	1075	chr12	64784283	64785677	+	1394	1075	1394	0.1292	0	0.065642	0.954846
mlclust_496	chr10	121218049	121219045	-	996	chr12	64540572	64541610	+	1038	995	1037	0.02067	0	0.102073	2.54196
mlclust_497	chr10	122144628	122145531	+	903	chr12	63304715	63304935	-	220	903	220	0.60819	0	0.056236	0
mlclust_498	chr10	122193493	122195466	-	1973	chr12	63249113	63251951	+	2838	1972	593	0.53762	105	0.304162	0.028271
mlclust_499	chr10	122214535	122215121	-	586	chr12	63230062	63230495	+	433	586	433	0.15015	0	0.295453	0
mlclust_500	chr10	122381747	122382844	+	1097	chr12	63037768	63038833	-	1065	1097	1065	0.0148	0	2.82724	10.4838
mlclust_501	chr10	122422132	122422887	-	755	chr12	62997166	62998175	+	1009	755	1009	0.14399	183	0	1.58294
mlclust_502	chr10	124659069	124660854	-	1785	chr12	60178244	60180657	+	2413	1785	2413	0.1496	0	0.018072	12.3275
mlclust_503	chr10	125692172	125694274	+	2102	chr12	58986589	58990015	-	3426	528	292	0.2878	0	0.480885	0.275575
mlclust_504	chr10	126130489	126131593	+	1104						1103			0	0
mlclust_505	chr10	126225919	126230766	-	4847	chr12	58481286	58485886	+	4600	1737	1803	0.01864	90	0.05847	0.029753
mlclust_506	chr10	126507512	126508155	+	643	chr12	58138051	58138665	-	614	643	614	0.02307	0	0.776188	0.142714
mlclust_507	chr10	126831225	126832253	+	1028						1028			99	0.139229
mlclust_508	chr10	127104225	127105741	+	1516	chr12	57480657	57482329	-	1672	482	518	0.036	0	0.936989	0.277114
mlclust_509	chr10	127518902	127520031	-	1129	chr12	57040128	57040377	+	249	1129	249	0.63861	0	0.224896	0.412666
mlclust_510	chr10	127566525	127567144	-	619	chr12	56988570	56989385	+	815	619	815	0.13668	0	0.227999	22.1471
mlclust_511	chr10	127774198	127775057	-	859	chr12	56693903	56694822	+	919	859	919	0.03375	126	6.29829	0.408615
mlclust_512	chr10	127804143	127806239	-	2096	chr12	56660520	56661961	+	1441	2096	1441	0.18519	138	0.054982	2.45704
mlclust_513	chr10	127936302	127940019	+	3717						890	270	0.53448	108	0.173246
mlclust_514	chr10	127985172	127986171	-	999	chr12	56510415	56511610	+	1195	389	421	0.03951	0	4.48688	29.5569
mlclust_515	chr10	128318973	128320215	-	1242	chr12	56145690	56147168	+	1478	1240	1478	0.08756	0	0.430625	3.00311
mlclust_516	chr10	128408252	128415166	+	6914	chr12	56053301	56054199	-	898	639	585	0.04412	0	9.76309	0
mlclust_517	chr11	4174091	4181931	+	7840	chr22	30626953	30634391	-	7438	720	705	0.01053	105	1.01371	0.11106
mlclust_518	chr11	5426425	5427597	-	1172	chr22	29188060	29189580	+	1520	1172	1520	0.12927	0	0.662306	0.083992
mlclust_519	chr11	6100031	6101646	+	1615	chr7	44530093	44530921	+	828	1615	828	0.32214	0	1.34242	0.682363
mlclust_520	chr11	6190872	6191848	-	976	chr7	44645615	44646414	-	799	976	799	0.09972	0	1.18076	0.097994
mlclust_521	chr11	6424544	6428747	-	4203	chr7	45022475	45025270	-	2795	1246	293	0.61923	0	0.60083	29.8231
mlclust_522	chr11	6503069	6505592	-	2523	chr7	45125847	45128538	-	2691	2523	2691	0.03222	120	0.878373	0.180667
mlclust_523	chr11	6526137	6527277	+	1140	chr7	45151401	45151715	+	314	1140	314	0.56809	0	0	0.327155
mlclust_524	chr11	7170353	7190377	-	20024	chr7	46062912	46087806	-	24894	1439	899	0.23097	0	0.148429	0.157867
mlclust_525	chr11	8714501	8717548	-	3047						3047			0	0
mlclust_526	chr11	11362096	11363643	+	1547	chr7	50132702	50135116	+	2414	1518	2394	0.22393	93	0.017756	0.196234
mlclust_527	chr11	13972105	14079044	-	106939	chr7	52686729	52734252	-	47523	1603	756	0.35905	0	46.4215	0.051784
mlclust_528	chr11	16650154	16651811	-	1657	chr7	55085442	55086279	-	837	1657	837	0.32879	0	0.043029	0.046773
mlclust_529	chr11	16834715	16851121	-	16406	chr7	55292878	55317931	-	25053	4039	9112	0.38575	99	0.008736	0.011457
mlclust_530	chr11	16858791	16860040	+	1249	chr2	68685599	68686224	-	625	1249	625	0.33298	0	0.027724	0.022672
mlclust_531	chr11	16978598	16979374	+	776	chr2	68520142	68520960	-	818	774	816	0.02642	117	0.038221	25.5989
mlclust_532	chr11	18367482	18393258	-	25776	chr2	67156350	67177623	+	21273	1339			141	0.02635
mlclust_533	chr11	18651329	18652625	-	1296	chr2	66922650	66923948	+	1298	1296	1298	0.00077	0	0.045725	0.405209
mlclust_534	chr11	18698944	18700512	+	1568	chr2	66896724	66897471	-	747	1568	747	0.35464	0	0.037793	0
mlclust_535	chr11	18740414	18743613	-	3199	chr2	66860555	66865166	+	4611	3199	4611	0.18079	0	0.031748	0.016981
mlclust_536	chr11	18769474	18770502	-	1028	chr2	66810163	66811266	+	1103	1028	1103	0.03519	0	0.028823	0.046522
mlclust_537	chr11	18926396	18927419	-	1023	chr2	66653100	66654431	+	1331	1023	1331	0.13084	210	0.031534	0.106019
mlclust_538	chr11	18965277	18975743	+	10466	chr2	66595318	66604803	-	9485	1416	400	0.55947	279	0.251038	0.163119
mlclust_539	chr11	19452823	19454723	-	1900	chr2	66062474	66063561	+	1087	1900	1087	0.27218	0	0.026727	0
mlclust_540	chr11	20641786	20644967	+	3181	chr2	64742709	64751267	-	8558	3181	8558	0.45805	0	0.044367	0.33089
mlclust_541	chr11	22881345	22882848	+	1503	chr2	62132183	62133526	-	1343	1503	1343	0.05622	0	0.838008	0.547591
mlclust_542	chr11	23052139	23066375	+	14236						537			0	1.32214
mlclust_543	chr11	23936469	23937595	-	1126	chr2	60831080	60833852	+	2772	1126	2772	0.42227	0	0	0
mlclust_544	chr11	24079458	24080839	+	1381	chr2	60671362	60672538	-	1176	1377	1176	0.07873	168	0	0
mlclust_545	chr11	25514876	25517510	-	2634	chr2	59233118	59235903	+	2785	2633	2785	0.02805	0	0.011436	0
mlclust_546	chr11	25784171	25785571	-	1400	chr2	58962683	58964800	+	2117	1400	2117	0.20387	0	0	0
mlclust_547	chr11	28581563	28593276	+	11713	chr2	56267124	56276801	-	9677	1597	1749	0.04543	0	0.063596	0.007461
mlclust_548	chr11	31003233	31005355	+	2122	chr2	53887804	53890146	-	2342	2122	2342	0.04928	0	0.016627	0.501077
mlclust_549	chr11	31700687	31724524	-	23837	chr5	173212477	173248972	-	36495	715	598	0.08911	0	1.37068	13.181
mlclust_550	chr11	31770096	31770745	-	649	chr5	173314479	173315177	-	698	649	698	0.03638	0	0	0.074313
mlclust_551	chr11	32033275	32036195	-	2920	chr5	173631896	173632230	-	334	2920	334	0.79471	138	0.023147	0
mlclust_552	chr11	32689761	32690725	-	964	chr5	171244093	171245224	+	1131	668	769	0.07029	165	0.044356	0
mlclust_553	chr11	33993042	33994126	-	1084	chr5	169673158	169674032	+	874	1084	874	0.10725	0	0.287494	6.44524
mlclust_554	chr11	34294008	34294866	-	858	chr5	169319059	169319652	+	593	858	593	0.18263	150	0.034479	0.645875
mlclust_555	chr11	34307925	34311404	-	3479	chr5	169301481	169305048	+	3567	3478	3566	0.01249	117	0.025558	0.112333
mlclust_556	chr11	35602330	35603344	+	1014	chr5	167977617	167978570	-	953	1014	953	0.03101	0	0.056887	7.64483
mlclust_557	chr11	36873443	36874460	-	1017	chr5	166584456	166584809	+	353	1017	353	0.48467	0	0.049933	0
mlclust_558	chr11	36913881	36915446	-	1565	chr5	166544541	166545391	+	850	1565	850	0.29607	0	0	0
mlclust_559	chr11	38072808	38076993	-	4185	chr5	165373618	165374502	+	884	4184	883	0.65147	0	0	0
mlclust_560	chr11	38305049	38333512	-	28463	chr5	165085910	165134425	+	48515	2418	1660	0.18588	123	0.111473	0.070694
mlclust_561	chr11	40554795	40556545	+	1750	chr5	162876966	162878528	-	1562	1750	1562	0.05676	0	0	1.74931
mlclust_562	chr11	40557315	40558870	+	1555	chr5	162875569	162876536	-	967	1555	967	0.23315	129	0.034062	1.07455
mlclust_563	chr11	42443141	42445143	+	2002	chr5	160716359	160718329	-	1970	2000	1966	0.00857	0	0.044445	18.7771
mlclust_564	chr11	42629168	42632682	+	3514	chr5	160528354	160531503	-	3149	3514	3149	0.05478	0	0.009617	0
mlclust_565	chr11	43074227	43075771	+	1544	chr5	159990141	159991775	-	1634	1542	1632	0.02836	0	0.019185	1.66062
mlclust_566	chr11	43494597	43496159	-	1562	chr5	159545769	159547451	+	1682	1556	1676	0.03713	0	0.580553	0.328637
mlclust_567	chr11	43534658	43535917	+	1259	chr5	159502886	159504199	-	1313	1259	1313	0.021	0	0.541292	3.4501
mlclust_568	chr11	44916367	44930430	-	14063	chr5	158033880	158038081	+	4201	1447	1676	0.07333	114	0.046709	0
mlclust_569	chr11	47413211	47416112	-	2901	chr5	155530558	155532834	+	2276	2901	2276	0.12073	0	0.011649	0.041247
mlclust_570	chr11	48675469	48685185	-	9716						3832			0	0.080197
mlclust_571	chr11	49934171	49938178	+	4007	chr5	179339748	179345700	-	5952	4007	5952	0.1953	0	0.015573	1.82236
mlclust_572	chr11	50104911	50106654	+	1743	chr5	179158606	179160759	-	2153	1743	2153	0.10524	420	0.591234	1.05819
mlclust_573	chr11	50624596	50627343	-	2747	chr5	178507625	178509421	+	1796	2745	1796	0.20898	0	0.038905	1.59997
mlclust_574	chr11	50729252	50731647	+	2395	chr5	178322792	178323485	-	693	2395	693	0.55117	0	0.110577	0.024191
mlclust_575	chr11	50757382	50758032	+	650						650			0	0.078125
mlclust_576	chr11	51394914	51397420	+	2506	chr5	177660770	177663979	-	3209	2506	3209	0.12301	129	0.264345	2.66576
mlclust_577	chr11	51452389	51453838	-	1449	chr5	177551881	177552335	+	454	1449	454	0.52286	171	0.036851	2.79918
mlclust_578	chr11	51910813	51912091	-	1278	chr5	133562063	133563498	+	1435	1278	1435	0.05787	99	0.023148	0.306443
mlclust_579	chr11	53244073	53244859	+	786	chr5	132201890	132202691	-	801	786	801	0.00945	111	77.2683	4.75508
mlclust_580	chr11	53378265	53380815	-	2550						1428	191	0.76405	0	0.062248
mlclust_581	chr11	53415446	53417736	+	2290	chr5	132028324	132031449	-	3125	2290	3125	0.1542	0	0.069953	13.1435
mlclust_582	chr11	54633420	54638469	+	5049	chr5	130558538	130561269	-	2731	928			174	1.18191
mlclust_583	chr11	54673491	54675007	+	1516	chr5	130505713	130506754	-	1041	1516	1041	0.18576	0	0.515615	0.049828
mlclust_584	chr11	55005220	55011184	-	5964	chr5	150735535	150736657	-	1122	1790			0	0.039422
mlclust_585	chr11	55048610	55049831	+	1221	chr5	150870640	150871939	+	1299	1219	1297	0.031	174	0	2.77284
mlclust_586	chr11	55315067	55318336	+	3269	chr5	151185350	151190909	+	5559	3268	2548	0.1238	0	0.020159	20.5114
mlclust_587	chr11	55421574	55422159	-	585	chr5	151304463	151305043	-	580	585	580	0.00429	0	0	0
mlclust_588	chr11	57415078	57416174	-	1096	chr5	153519304	153519736	-	432	1096	432	0.43455	102	0.030834	0.164182
mlclust_589	chr11	57874853	57875532	+	679	chr5	154196408	154197161	+	753	679	753	0.05168	0	0.168634	36.1521
mlclust_590	chr11	58136489	58137941	+	1452						886			222	0.702288
mlclust_591	chr11	58790190	58791183	-	993						993			0	0.080009
mlclust_592	chr11	59011294	59015887	-	4593						3403			0	0.015841
mlclust_593	chr11	59319197	59324887	+	5690						2537	1898	0.14408	168	0.451017
mlclust_594	chr11	59735000	59735391	+	391						274			93	0
mlclust_595	chr11	60040216	60040472	-	256	chr17	17746823	17747101	-	278	256	278	0.0412	0	0.112662	38.9566
mlclust_596	chr11	60345564	60347376	-	1812						1812			126	0.019472
mlclust_597	chr11	60349226	60351405	-	2179	chr17	18085727	18087029	-	1302	2176	1300	0.25201	0	0.278704	0.64244
mlclust_598	chr11	60685227	60686301	-	1074	chr17	21110132	21111302	-	1170	1074	1170	0.04278	0	0.137942	0.069075
mlclust_599	chr11	61431339	61432649	+	1310						1310			0	0.020216
mlclust_600	chr11	62363025	62364461	-	1436	chr17	16281480	16282560	-	1080	1436	1080	0.14149	0	0.14874	0.112795
mlclust_601	chr11	62416378	62418308	+	1930	chr17	16342355	16345221	+	2866	1404	1486	0.02837	0	0.276432	109.236
mlclust_602	chr11	62570679	62574060	-	3381						2391			0	0.044305
mlclust_603	chr11	62732580	62735094	-	2514	chr17	15405879	15408339	+	2460	1011	671	0.20214	174	0.113257	3.3648
mlclust_604	chr11	62987415	63001956	+	14541	chr17	15090389	15113842	-	23453	734	152	0.65688	0	0.096139	2.64704
mlclust_605	chr11	63226670	63231390	+	4720	chr17	14811293	14822034	-	10741	3270	2868	0.06549	105	0.018094	0.03185
mlclust_606	chr11	63698194	63701270	+	3076	chr17	14250857	14253401	-	2544	3074	2466	0.10975	111	4.98672	9.13798
mlclust_607	chr11	63893018	63896758	+	3740	chr17	13964525	13972787	-	8262	865	610	0.17288	111	0.356507	1.13562
mlclust_608	chr11	64586591	64588204	-	1613	chr17	13145666	13146635	+	969	1613	969	0.24942	0	0	0
mlclust_609	chr11	64975633	64977568	+	1935	chr17	12691416	12693718	-	2302	1935	2302	0.08662	285	0.436619	0.089675
mlclust_610	chr11	66771395	66778516	+	7121	chr17	10698305	10705961	-	7656	1071	1191	0.05305	255	0.030757	2.05982
mlclust_611	chr11	66925962	66933582	-	7620	chr17	10508435	10518935	+	10500	2723	3538	0.13017	0	2.00306	0.23337
mlclust_612	chr11	67388639	67390424	+	1785	chr17	9955351	9956744	-	1393	1780	1387	0.12409	0	0.029999	0.131443
mlclust_613	chr11	68396765	68400459	-	3694	chr17	8648193	8650034	+	1841	1333	461	0.48606	249	0.025977	0.707677
mlclust_614	chr11	68504372	68505272	-	900	chr17	8534382	8535384	+	1002	900	1002	0.05363	0	0.19722	0.039071
mlclust_615	chr11	68871219	68872977	-	1758	chr17	8093781	8094610	+	829	1758	829	0.3591	0	0.060748	0.347305
mlclust_616	chr11	69107652	69108979	+	1327						383			0	0.24439
mlclust_617	chr11	69262049	69267178	+	5129	chr17	7701268	7707628	-	6360	859	768	0.05593	138	2.09479	0.662673
mlclust_618	chr11	69615637	69616437	-	800	chr17	7341592	7342407	+	815	800	815	0.00929	0	0.168972	0.946652
mlclust_619	chr11	69617403	69620412	+	3009	chr17	7338431	7340538	-	2107	3007	2105	0.17645	0	1.15885	2.90206
mlclust_620	chr11	69652064	69653114	+	1050	chr17	7306296	7307405	-	1109	953	1009	0.02854	96	0.305681	12.8309
mlclust_621	chr11	71460577	71471979	-	11402	chr17	5859330	5870160	-	10830	3730	2007	0.30033	0	0.014781	0.026008
mlclust_622	chr11	71741972	71753624	-	11652	chr17	6201049	6210805	-	9756	787	1183	0.20102	0	0.039184	0.045767
mlclust_623	chr11	72079922	72082077	+	2155	chr17	6616507	6619458	+	2951	1801	1998	0.05186	99	0.450341	0.142593
mlclust_624	chr11	72829366	72832343	-	2977	chr17	3796532	3798946	+	2414	2413	1925	0.11249	0	0.752389	0.372917
mlclust_626	chr11	75022057	75024108	+	2051	chr17	1905896	1908877	-	2981	2051	2981	0.18482	0	0.692034	0.168389
mlclust_627	chr11	75275131	75280192	+	5061	chr17	1614800	1619548	-	4748	1675	1424	0.08099	180	0.121269	20.1476
mlclust_628	chr11	75343778	75346573	-	2795	chr17	1530694	1533730	+	3036	2795	3036	0.04133	447	0.710269	1.15038
mlclust_629	chr11	76427968	76435704	-	7736	chr17	1125246	1132112	-	6866	2493	1740	0.17789	105	0.012078	0.283201
mlclust_630	chr11	76482687	76486548	-	3861	chr17	1172292	1174352	-	2060	3861	2060	0.30417	279	0.084416	0.032929
mlclust_631	chr11	76590709	76592474	-	1765	chr17	28795102	28797010	+	1908	1765	1908	0.03893	0	0.017472	11.8246
mlclust_632	chr11	77025478	77026708	-	1230	chr17	28260294	28261282	+	988	1230	988	0.10911	0	0.05737	0.085166
mlclust_633	chr11	77303355	77304911	+	1556	chr17	27918717	27920333	-	1616	1082	1114	0.01457	0	0.224203	0.138321
mlclust_634	chr11	77342669	77343643	-	974	chr17	27877956	27878916	+	960	974	960	0.00724	0	0.224233	17.6902
mlclust_635	chr11	77528788	77529894	+	1106	chr17	27584531	27585686	-	1155	1106	1155	0.02167	120	0.310312	14.9998
mlclust_636	chr11	77579531	77583025	+	3494	chr17	27499977	27504455	-	4478	3016	4438	0.19077	162	0.011481	0.041553
mlclust_637	chr11	78000570	78002898	-	2328	chr17	27044224	27045909	+	1685	2327	1685	0.16002	0	1.34757	1.93184
mlclust_638	chr11	78112201	78115004	-	2803	chr17	26926142	26928516	+	2374	2803	2374	0.08287	0	0.783671	0.590074
mlclust_639	chr11	78597722	78598521	-	799	chr17	26276324	26276685	+	361	799	361	0.37759	96	0	0
mlclust_640	chr11	79508309	79511523	+	3214	chr17	29860981	29865234	+	4253	3214	4253	0.13915	0	0.060223	6.86667
mlclust_641	chr11	79517377	79517952	-	575	chr17	29876050	29876896	-	846	575	846	0.19071	0	1.00211	0.527979
mlclust_642	chr11	79543801	79544888	+	1087	chr17	29908902	29909878	+	976	1087	976	0.05381	0	0	0.068707
mlclust_643	chr11	80216820	80219373	+	2553	chr17	30705710	30708480	+	2770	2548	2524	0.00473	0	3.54291	4.36688
mlclust_644	chr11	80241233	80242677	-	1444	chr17	30770386	30772065	-	1679	1444	1679	0.07525	0	0.860446	0.303117
mlclust_645	chr11	80663882	80671802	-	7920	chr17	31290843	31318759	-	27916	1152	11603	0.81936	0	0.075108	0.020244
mlclust_646	chr11	81787193	81788815	+	1622	chr17	32489334	32491455	+	2121	1622	2121	0.13332	0	0	0.039521
mlclust_647	chr11	82593145	82594541	-	1396	chr17	33304088	33307374	-	3286	1396	3286	0.40367	0	0.198811	0.038852
mlclust_648	chr11	82787817	82789087	-	1270						1270			102	0.055564
mlclust_649	chr11	83037095	83040087	+	2992						1951			0	0.091361
mlclust_650	chr11	83105243	83108133	+	2890	chr17	33895172	33901328	+	6156	340	692	0.34109	0	5.82958	10.8166
mlclust_651	chr11	83631183	83662995	-	31812	chr17	36106392	36149913	+	43521	3036	3356	0.05006	186	0.479767	0.742513
mlclust_652	chr11	84339185	84349332	+	10147	chr17	35283387	35293936	-	10549	599	541	0.05088	0	0.395098	12.2745
mlclust_653	chr11	84642679	84644370	+	1691	chr17	34947327	34948181	-	854	755	280	0.45894	0	0.408448	0.144317
mlclust_654	chr11	84953752	84955132	+	1380	chr17	58469784	58470878	+	1094	1380	1094	0.1156	0	0.025092	0.035785
mlclust_655	chr11	85048276	85051804	+	3528	chr17	58603257	58613918	+	10661	1897	630	0.50139	156	0.50794	2.65134
mlclust_656	chr11	86079958	86082101	-	2143	chr17	60019474	60021471	-	1997	2142	1997	0.03503	0	0.067324	8.06749
mlclust_657	chr11	86394702	86395196	-	494						493			0	0.068548
mlclust_658	chr11	86679521	86683187	-	3666	chr17	57558496	57564130	+	5634	3666	5634	0.21161	0	0.017022	0.025178
mlclust_659	chr11	87569078	87570769	+	1691	chr17	56408248	56409881	-	1633	266	283	0.03097	0	0.911239	44.3104
mlclust_660	chr11	87865199	87867258	+	2059	chr17	56078006	56080619	-	2613	2059	2613	0.11858	0	0.155602	5.01252
mlclust_661	chr11	88152962	88156489	-	3527	chr17	55758545	55761966	+	3421	3527	3421	0.01526	0	0.130698	11.2647
mlclust_662	chr11	88210015	88211922	+	1907	chr17	55690974	55691295	-	321	1790	240	0.76355	0	0.432526	0.169193
mlclust_663	chr11	88333600	88336661	-	3061	chr17	55556948	55560567	+	3619	3061	3619	0.08353	0	0	0.026181
mlclust_664	chr11	88482439	88483958	-	1519	chr17	55442476	55443160	+	684	1519	684	0.37903	123	0.319144	0.098462
mlclust_665	chr11	88579958	88583914	+	3956	chr17	55330609	55333535	-	2926	3220	2166	0.19569	0	0.010957	0.206219
mlclust_666	chr11	92958130	92960399	-	2269	chr17	50236283	50238709	+	2426	2268	2425	0.03345	0	1.0974	0.006913
mlclust_667	chr11	94538878	94548978	+	10100	chr17	48416386	48423314	-	6928	1511	1321	0.06709	117	0.094373	0.150337
mlclust_668	chr11	94870711	94871231	-	520	chr17	48207486	48208093	+	607	520	607	0.0772	0	0.341342	0.106277
mlclust_669	chr11	95042278	95044464	-	2186	chr17	48008601	48011404	+	2803	2186	2803	0.12367	114	0.067772	0.029905
mlclust_670	chr11	95561421	95574068	-	12647	chr17	47439753	47458482	+	18729	535	883	0.24542	183	0.963104	3.05466
mlclust_671	chr11	95590073	95592261	+	2188						2188			0	0.098659
mlclust_672	chr11	95685270	95685725	-	455	chr17	47308244	47308717	+	473	455	473	0.0194	0	0	0.603145
mlclust_673	chr11	95720178	95722358	+	2180	chr17	47268712	47270267	-	1555	1269	664	0.31299	0	0.845894	0.291461
mlclust_674	chr11	95818480	95821617	-	3137	chr17	47130085	47133498	+	3413	3134	3410	0.04218	0	0.053916	1.65703
mlclust_675	chr11	96152349	96168224	-	15875	chr17	46667779	46683759	+	15980	584	611	0.02259	0	47.1164	35.3604
mlclust_676	chr11	96156167	96156721	+	554	chr17	46679387	46679952	-	565	554	565	0.00983	0	0.312519	2.6224
mlclust_677	chr11	96675319	96676923	+	1604						1603			105	1.19956
mlclust_678	chr11	97257738	97258372	+	634	chr17	36559522	36560228	+	706	634	706	0.05373	0	0.042515	6.24752
mlclust_679	chr11	97370662	97372345	-	1683	chr17	36686267	36687960	-	1693	1683	1693	0.00296	0	0.200798	7.12967
mlclust_680	chr11	97459824	97484207	+	24383	chr17	36808428	36824250	+	15822	612	321	0.3119	195	0.7069	0.121958
mlclust_681	chr11	97702606	97705413	+	2807	chr17	37081829	37083969	+	2140	2188	1603	0.15431	117	0.024638	3.76498
mlclust_682	chr11	98011069	98012168	+	1099	chr17	37558064	37559211	+	1147	1099	1147	0.02137	0	0.234422	0.136041
mlclust_683	chr11	98140107	98140790	+	683						683			0	0.038775
mlclust_684	chr11	98146695	98148758	+	2063	chr17	37720532	37722671	+	2139	2063	2139	0.01809	0	0.207067	0.377832
mlclust_685	chr11	99281285	99286811	+	5526	chr17	39021331	39028767	+	7436	2767	2988	0.0384	117	0.249894	0.042986
mlclust_686	chr11	99854547	99855308	-	761	chr17	39471165	39471956	-	791	761	791	0.01933	0	0	0.021194
mlclust_687	chr11	99963957	99967424	+	3467	chr17	39643032	39646601	+	3569	3467	3569	0.0145	261	0.014647	0.038582
mlclust_688	chr11	100318438	100319486	-	1048	chr17	40004772	40005956	-	1184	1048	1184	0.06093	0	0.036655	9.96351
mlclust_689	chr11	102150614	102152407	-	1793	chr17	42269173	42271064	-	1891	1793	1891	0.0266	0	0.10795	9.59213
mlclust_690	chr11	102437712	102440433	-	2721	chr17	42613574	42616530	-	2956	677	458	0.19295	0	0.17791	0.092917
mlclust_691	chr11	102440675	102441485	+	810	chr17	42617094	42617939	+	845	810	845	0.02115	0	0.09983	0.016787
mlclust_692	chr11	102991693	102994239	-	2546	chr17	43236860	43238936	-	2076	2544	2074	0.10178	0	0.224209	1.03278
mlclust_693	chr11	103206066	103211438	+	5372	chr17	43487836	43496717	+	8881	2727	1308	0.35167	0	0.996252	0.385981
mlclust_694	chr11	103289593	103290808	+	1215						1214			0	0.418299
mlclust_695	chr11	103366595	103368271	+	1676	chr5	139495936	139496249	+	313	1658	202	0.7828	0	0	11.2407
mlclust_696	chr11	103559037	103566973	+	7936	chr17	44984726	45000475	-	15749	3303	5846	0.27795	99	0.018233	0.12054
mlclust_697	chr11	104363842	104366512	-	2670	chr17	45195074	45197880	-	2806	2670	2806	0.02484	111	0.055399	8.65864
mlclust_698	chr11	104700217	104701468	-	1251						1251			0	0.043092
mlclust_699	chr11	105143943	105145270	+	1327	chr17	60691694	60692843	+	1149	1327	1149	0.07189	0	0.020773	2.00966
mlclust_700	chr11	105785987	105790617	+	4630	chr17	61500165	61505064	+	4899	4630	4899	0.02823	0	0.174186	5.08174
mlclust_701	chr11	105805017	105806567	+	1550	chr17	61523095	61525044	+	1949	1550	1949	0.11403	189	0.478685	0.076393
mlclust_702	chr11	105826921	105847008	-	20087	chr17	61551578	61571404	-	19826	1241	1308	0.02628	0	103.148	16.2222
mlclust_703	chr11	105926395	105928158	-	1763	chr17	61677616	61678917	-	1301	1762	1141	0.21392	99	28.3853	0.618289
mlclust_704	chr11	106245347	106249402	-	4055	chr17	62085812	62097955	-	12143	4052	3412	0.08574	0	0.087574	1.46759
mlclust_705	chr11	106889431	106891752	+	2321	chr17	65987217	65989726	-	2509	997	1181	0.08448	0	0.212334	5.85838
mlclust_706	chr11	107225774	107228528	-	2754	chr17	65497990	65500868	+	2878	2754	2878	0.02202	0	0.058167	0.059147
mlclust_707	chr11	107289589	107297000	+	7411	chr17	65413799	65418099	-	4300	876	237	0.57412	93	7.58607	2.454
mlclust_708	chr11	107551976	107552427	+	451	chr17	65069767	65070253	-	486	451	486	0.03735	0	0.079045	6.54237
mlclust_709	chr11	107553609	107555135	+	1526	chr17	65066564	65068062	-	1498	1526	1498	0.00926	0	0.327057	7.95343
mlclust_710	chr11	109259308	109262682	+	3374	chr17	63005412	63008777	-	3365	3374	3365	0.00134	99	0.020915	27.1421
mlclust_711	chr11	109626730	109627560	+	830						830			0	0
mlclust_712	chr11	109707191	109709790	+	2599						389			189	0.086875
mlclust_713	chr11	111657660	111662190	-	4530	chr17	68951148	68964685	-	13537	3005	9748	0.52874	204	0	0.004361
mlclust_714	chr11	112018207	112018665	-	458	chr17	69421853	69421997	-	144	458	144	0.52159	234	0	0
mlclust_715	chr11	112684278	112686421	-	2143	chr17	70158754	70160355	-	1601	384	198	0.31959	0	0	0
mlclust_716	chr11	112901679	112903324	-	1645	chr17	70395909	70397611	-	1702	1641	1700	0.01766	132	0	0.043684
mlclust_717	chr11	112905208	113063152	-	157944	chr17	70399215	70588943	-	189728	2513	2951	0.08016	0	0.631806	2.92571
mlclust_718	chr11	113064628	113070983	-	6355	chr17	70590281	70600468	-	10187	2446	1266	0.31789	168	0.062283	0.278086
mlclust_719	chr11	114080552	114099816	-	19264	chr17	71784330	71799552	-	15222	1855	1295	0.17778	165	0.082126	0.130999
mlclust_720	chr11	115719219	115721008	-	1789	chr17	73583623	73585468	-	1845	1789	1845	0.01541	0	0.072128	0.169148
mlclust_721	chr11	115948986	115949497	+	511						511			0	0.069764
mlclust_722	chr11	115960254	115961182	+	928						928			108	1.72868
mlclust_723	chr11	116135583	116136341	+	758						758			0	0.226588
mlclust_724	chr11	116938103	116940268	+	2165	chr17	75084729	75089523	+	4794	592	822	0.16266	0	0.097438	4.8665
mlclust_725	chr11	116956398	116958341	-	1943	chr17	75110048	75110256	-	208	753	173	0.62635	0	0.816238	0.149915
mlclust_726	chr11	117245886	117246693	+	807	chr17	75538414	75539289	+	875	807	875	0.04043	0	0.125852	0
mlclust_727	chr11	117269024	117272022	+	2998	chr17	75567480	75570539	+	3059	2996	3057	0.01008	0	0.050253	0.043872
mlclust_728	chr11	117523352	117525204	+	1852	chr17	75962620	75964055	+	1435	1852	1435	0.12686	0	0.082259	0.247131
mlclust_729	chr11	117835679	117838398	+	2719	chr17	76360514	76363929	+	3415	2719	3415	0.11347	0	0.093383	0.112153
mlclust_730	chr11	118120967	118127362	-	6395	chr17	76791725	76800262	-	8537	3814	3639	0.02348	255	0.245132	5.93296
mlclust_731	chr11	118151777	118152371	+	594						594			0	0.059399
mlclust_732	chr11	119409943	119431846	+	21903	chr17	78451339	78481602	+	30263	3191	4219	0.13873	132	0.046427	0.015894
mlclust_733	chr11	119794323	119794849	-	526						526			0	0
mlclust_734	chr11	119797026	119797834	-	808	chr17	78999138	78999731	-	593	808	593	0.15346	0	0.122303	0.216329
mlclust_735	chr11	119960250	119961736	+	1486	chr17	79213119	79215117	+	1998	489	570	0.07649	222	0.379104	9.72789
mlclust_736	chr11	120049274	120051199	-	1925	chr17	79317672	79319785	-	2113	1925	2113	0.04656	0	0.027739	0.07411
mlclust_737	chr11	120124335	120126815	+	2480	chr17	79402878	79403508	+	630	2480	630	0.59486	0	0.081906	0.044985
mlclust_738	chr11	120210037	120212504	+	2467	chr17	79480059	79483434	+	3375	573	1004	0.2733	0	0.201337	0.52578
mlclust_739	chr11	120442983	120444151	+	1168						1168			0	0.043477
mlclust_740	chr11	120495081	120496439	+	1358						908			171	0.333954
mlclust_741	chr11	120533747	120534587	-	840	chr17	79935364	79935698	-	334	840	334	0.43101	0	0.430162	0.162101
mlclust_742	chr11	120794263	120795044	+	781	chr17	80170819	80171083	+	264	781	264	0.49474	153	0	0.051271
mlclust_743	chr11	120862141	120863399	+	1258						1258			108	0
mlclust_744	chr12	3404064	3426644	-	22580	chr2	26101607	26150643	+	49036	3070	1813	0.25742	0	5.69109	24.643
mlclust_745	chr12	3803311	3806221	-	2910	chr2	25565671	25569942	+	4271	2910	4271	0.18953	0	0.040728	0.054065
mlclust_746	chr12	4540083	4543165	-	3082	chr2	24644473	24646249	+	1776	3082	1776	0.26883	0	0.026237	0.014695
mlclust_747	chr12	4923313	4924008	-	695	chr2	24150171	24151525	+	1354	695	1354	0.32162	240	0.046416	0.754316
mlclust_748	chr12	5815039	5862948	+	47909	chr2	23179947	23218572	-	38625	780	614	0.11908	141	0.129978	0.02284
mlclust_749	chr12	5933833	5950438	-	16605	chr2	23102309	23119494	+	17185	1517	1259	0.09294	138	0.467818	0.04146
mlclust_750	chr12	6273826	6276219	+	2393	chr2	22810242	22819737	-	9495	2369	703	0.54232	0	0	0
mlclust_751	chr12	7530807	7866497	-	335690	chr2	21396367	21725423	+	329056	2111	1735	0.09776	0	41.1376	0.797264
mlclust_752	chr12	8460309	8461724	+	1415	chr2	20706019	20707229	-	1210	1415	1210	0.0781	0	0.124674	0.013855
mlclust_753	chr12	8758534	8759358	+	824	chr2	20448477	20449344	-	867	824	867	0.02543	0	0.105006	21.5998
mlclust_754	chr12	9036239	9037261	-	1022	chr2	20101439	20109840	+	8401	1022	8401	0.78308	174	0.265168	0.0466
mlclust_755	chr12	10226665	10229135	-	2470	chr2	18933099	18937826	+	4727	2468	1659	0.19603	99	0	0.042753
mlclust_756	chr12	10397066	10398140	-	1074	chr2	18741288	18744919	+	3631	1074	3631	0.54346	0	0.627426	1.49507
mlclust_757	chr12	11209294	11211215	-	1921	chr2	18002713	18004528	+	1815	1235	1217	0.00734	0	0	0.013775
mlclust_758	chr12	11445032	11451618	+	6586	chr2	17712037	17720149	-	8112	1941	3029	0.21891	120	0.036355	0.28227
mlclust_759	chr12	12729666	12733206	+	3540	chr2	16346914	16350687	-	3773	3540	3773	0.03186	0	0.02869	0
mlclust_760	chr12	12794790	12801091	+	6301	chr2	16239360	16243576	-	4216	1466	1591	0.04089	90	0.254968	0.031611
mlclust_761	chr12	13003987	13004839	+	852						852			0	0
mlclust_762	chr12	14134921	14137454	-	2533	chr2	14792458	14794107	+	1649	2532	1648	0.21148	90	0.727024	0.081382
mlclust_763	chr12	14145916	14148027	-	2111	chr2	14784103	14785169	+	1066	2102	902	0.39947	99	0	0.194129
mlclust_764	chr12	15003194	15057195	-	54001	chr2	13796548	13865632	+	69084	806	48	0.88759	138	0.267536	3.60996
mlclust_765	chr12	16783605	16786695	-	3090	chr2	11650488	11652649	+	2161	3086	1934	0.22948	0	0.298749	0.013495
mlclust_766	chr12	17695086	17696325	-	1239	chr2	10438199	10438670	-	471	1239	471	0.44912	0	0.395727	0.057608
mlclust_767	chr12	25447205	25449797	+	2592	chr2	9225585	9226147	-	562	312			96	0.386043
mlclust_768	chr12	25645521	25649257	+	3736	chr2	8992827	8997210	-	4383	3735	4383	0.07982	0	0.04289	5.18659
mlclust_769	chr12	27504649	27519738	-	15089	chr2	6538076	6554155	+	16079	1584	824	0.31561	0	0.044549	0.047511
mlclust_770	chr12	28019461	28020456	-	995	chr2	5841139	5842092	+	953	995	953	0.02156	0	0.030263	0.269553
mlclust_771	chr12	28283063	28299328	+	16265	chr2	5492825	5507566	-	14741	2099	1392	0.20252	108	0.076318	0.018749
mlclust_772	chr12	29789351	29791602	-	2251	chr2	2874571	2876495	+	1924	2145	1635	0.13492	96	0.066479	0.063851
mlclust_773	chr12	30211770	30215980	-	4210	chr2	2332314	2336617	+	4303	1528	1573	0.01451	0	2.48727	0.479598
mlclust_774	chr12	31095423	31152223	-	56800	chr2	825510	904140	+	78630	1547	349	0.63186	0	0.049663	5.79565
mlclust_775	chr12	32781485	32808567	-	27082	chr7	106619844	106646025	+	26181	1067	1023	0.02105	0	0.750668	0.180071
mlclust_776	chr12	33609821	33638648	-	28827	chr7	105753170	105782440	+	29270	1449	1761	0.0972	93	0.766158	1.37832
mlclust_777	chr12	33662001	33664359	+	2358	chr7	105728047	105730693	-	2646	2358	2646	0.05755	0	0.014963	0.482494
mlclust_778	chr12	33817919	33832462	-	14543	chr7	105517193	105533915	+	16722	3791	1938	0.32344	0	0.044572	0.588232
mlclust_779	chr12	33945080	33947574	+	2494	chr7	105384072	105386497	-	2425	2493	2424	0.01403	0	0.011569	0.137597
mlclust_780	chr12	34059257	34061262	+	2005	chr7	105244782	105246746	-	1964	2005	1964	0.01033	0	0.029509	2.54313
mlclust_781	chr12	35387676	35389776	-	2100	chr7	18341381	18349095	+	7714	2100	7714	0.57204	0	0	0.023906
mlclust_782	chr12	35458339	35459957	-	1618	chr7	18272108	18273729	+	1621	1618	1621	0.00093	0	0.125541	0
mlclust_783	chr12	36357051	36379790	-	22739	chr7	17132518	17162270	+	29752	835	549	0.20665	132	0.81118	0.180357
mlclust_784	chr12	36704330	36705662	+	1332	chr7	16862592	16863900	-	1308	1329	1305	0.00911	0	0.040563	0
mlclust_785	chr12	37445600	37448614	-	3014	chr7	16103049	16106043	+	2994	3009	2994	0.0025	144	0.023016	0.026876
mlclust_786	chr12	37455736	37458297	+	2561	chr7	16092358	16092822	-	464	2557	456	0.69731	0	0.062649	0
mlclust_787	chr12	40925242	40927692	+	2450	chr7	112118858	112122018	-	3160	2299	3006	0.13327	99	0.438197	0.254521
mlclust_788	chr12	45415565	45423476	+	7911	chr7	108103886	108108389	-	4503	7614	3874	0.32556	0	0.014026	0.108187
mlclust_789	chr12	46538167	46542685	+	4518	chr14	25864119	25867610	+	3491	4399	3346	0.13596	0	0	0.004008
mlclust_790	chr12	46567279	46647664	+	80385	chr14	25881405	25980406	+	99001	3401	4438	0.13229	0	9.876	0.356838
mlclust_791	chr12	46770485	46772780	-	2295	chr14	26096306	26099067	-	2761	2295	2761	0.09217	0	0	0
mlclust_792	chr12	47768303	47793979	+	25676	chr14	26885349	26909838	+	24489	3896	3842	0.00698	0	0.456312	0.026181
mlclust_793	chr12	47791117	47795466	-	4349	chr14	26907046	26911641	-	4595	4349	4595	0.0275	0	0.013847	0.018312
mlclust_794	chr12	50490874	50508332	+	17458	chr14	29242008	29261967	+	19959	3602	5012	0.16369	0	0.014966	0.612116
mlclust_795	chr12	50577979	50581849	-	3870	chr14	29341497	29345536	-	4039	708	609	0.07517	0	0.525053	0
mlclust_796	chr12	53071845	53073348	+	1503	chr14	31889107	31890990	+	1883	1503	1883	0.11223	210	0.323776	0.055442
mlclust_797	chr12	53418546	53421902	+	3356						3356			0	0.010513
mlclust_798	chr12	53669634	53672010	+	2376	chr14	32625458	32627557	+	2099	2376	2099	0.0619	0	0.074704	14.5682
mlclust_799	chr12	53700970	53703309	-	2339	chr14	32664735	32670025	-	5290	304			0	0.702599
mlclust_800	chr12	53807977	53809922	+	1945	chr14	32806975	32809937	+	2962	1945	2962	0.20725	93	0.017375	0.009139
mlclust_801	chr12	53847677	53849278	+	1601	chr14	32850583	32852385	+	1802	1599	1800	0.05914	0	0.744741	0.023617
mlclust_802	chr12	55172596	55173655	-	1059	chr14	34272811	34273890	-	1079	1059	1079	0.00935	147	1.51087	2.71901
mlclust_803	chr12	55334601	55343307	+	8706	chr14	34449639	34459343	+	9704	598	541	0.05004	0	0.059614	1.1439
mlclust_804	chr12	56698205	56700174	-	1969	chr14	36000409	36002997	-	2588	1969	2588	0.13583	0	0	0.040339
mlclust_805	chr12	57354229	57367368	+	13139	chr14	36684743	36698531	+	13788	1221	1455	0.08744	0	5.63485	1.0946
mlclust_806	chr12	57589307	57630247	-	40940	chr14	36939535	36982839	-	43304	10255	12052	0.08056	117	0.130741	9.36431
mlclust_807	chr12	58637237	58639596	+	2359	chr14	38054535	38057150	+	2615	2357	2613	0.05151	93	0.650368	0.227362
mlclust_808	chr12	59361746	59364435	-	2689						2689			0	0.011997
mlclust_809	chr12	60625588	60626997	-	1409	chr14	40185832	40187045	-	1213	1399	1150	0.09769	0	0	0.029156
mlclust_810	chr12	62600646	62622807	-	22161	chr14	42048891	42074798	-	25907	1089	902	0.09392	165	0.062065	4.03419
mlclust_811	chr12	63091303	63092794	-	1491						1485			0	0.024006
mlclust_812	chr12	66175976	66177302	-	1326	chr14	45604582	45605874	-	1292	1326	1292	0.01299	93	0.56771	0.261601
mlclust_813	chr12	67396829	67398228	+	1399						1398			0	0
mlclust_814	chr12	67567046	67568610	-	1564	chr14	47305722	47307332	-	1610	1564	1610	0.01449	0	0.034142	0.478989
mlclust_815	chr12	70071556	70090364	+	18808	chr14	49868511	49888617	+	20106	1749	814	0.36481	204	0.69683	0.099284
mlclust_816	chr12	70298195	70300855	+	2660	chr14	50100802	50102422	+	1620	2660	1620	0.24299	0	0.076363	0.210153
mlclust_817	chr12	71112424	71114130	-	1706	chr14	51186537	51188361	-	1824	1705	1823	0.03345	0	0.033832	18.5746
mlclust_818	chr12	71212700	71214227	+	1527	chr14	51297580	51299129	+	1549	1527	1549	0.00715	153	0.074985	0.032469
mlclust_819	chr12	71328829	71335152	+	6323	chr14	51411489	51420680	+	9191	1294	1099	0.08149	105	2.14887	0.319017
mlclust_820	chr12	72110778	72116563	-	5785	chr14	58759126	58764832	-	5706	810	112	0.75705	93	0.066554	32.5348
mlclust_821	chr12	74051881	74052681	+	800	chr14	60986004	60986485	+	481	800	481	0.24902	0	0.048018	0
mlclust_822	chr12	74137915	74142780	-	4865	chr14	61105933	61111256	-	5323	4865	5323	0.04495	0	0.030404	0.316015
mlclust_823	chr12	74140325	74142693	+	2368	chr14	61108571	61111210	+	2639	2366	2637	0.05417	180	0.625168	0.306777
mlclust_824	chr12	74418802	74419910	+	1108	chr14	61485307	61486204	+	897	1108	897	0.10524	0	0	0
mlclust_825	chr12	74649469	74652973	+	3504	chr14	61749969	61751680	+	1711	1039	542	0.31436	144	0.120117	1.17374
mlclust_826	chr12	75136330	75137797	-	1467	chr14	62345365	62346463	-	1098	1161	1003	0.07301	0	0.557193	0
mlclust_827	chr12	75943761	75950648	+	6887	chr14	63135359	63141255	+	5896	1015	1437	0.1721	171	7.89084	0
mlclust_828	chr12	75988506	75990981	-	2475	chr14	63166184	63168710	-	2526	2475	2526	0.0102	0	0.081926	2.30961
mlclust_829	chr12	76550451	76552411	-	1960	chr14	63838083	63840172	-	2089	1960	2089	0.03186	0	0.131444	5.88337
mlclust_830	chr12	76711673	76712273	-	600						600			0	0
mlclust_831	chr12	77355548	77356321	-	773	chr14	64854485	64854960	-	475	773	475	0.23878	0	1.42646	0.209047
mlclust_832	chr12	77433373	77435129	+	1756	chr14	64939497	64941219	+	1722	1748	1717	0.00895	0	3.24797	5.98527
mlclust_833	chr12	77503737	77504969	-	1232	chr14	65004913	65007023	-	2110	1232	2110	0.26272	0	0.089501	0.41437
mlclust_834	chr12	78162026	78162241	-	215	chr14	65697474	65698164	-	690	215	690	0.52486	0	0	0.41346
mlclust_835	chr12	78337051	78339650	-	2599	chr14	65876568	65879348	-	2780	2599	2780	0.03365	189	0.078155	0.261218
mlclust_836	chr12	78784047	78790478	+	6431	chr14	66432955	66437682	+	4727	1264	837	0.20324	0	0	0.062363
mlclust_837	chr12	79327365	79327764	+	399	chr14	66974853	66975245	+	392	391	384	0.00903	0	0.474122	0.635353
mlclust_838	chr12	80057918	80061202	-	3284	chr14	67930555	67935327	-	4772	3284	4772	0.18471	0	0.26053	0.289316
mlclust_839	chr12	81018005	81025720	-	7715	chr14	69042624	69051711	-	9087	1082	1152	0.03133	99	0.652178	0.322935
mlclust_840	chr12	81038259	81039373	+	1114	chr14	69066050	69067383	+	1333	1114	1333	0.0895	0	0.023773	0.153978
mlclust_841	chr12	81216867	81220071	+	3204	chr14	69262961	69266049	+	3088	3203	3088	0.01828	0	0.036018	0.050531
mlclust_842	chr12	81221535	81233831	-	12296	chr14	69270500	69283498	-	12998	1623	1823	0.05804	0	2.64557	0.988227
mlclust_843	chr12	81608192	81618941	+	10749	chr14	69716888	69725790	+	8902	508	483	0.02523	195	5.58804	0.624768
mlclust_844	chr12	82024422	82025434	-	1012						373	331	0.05966	90	0.079437
mlclust_845	chr12	82633954	82658445	+	24491						1089	620	0.27443	0	0.493846
mlclust_846	chr12	82815946	82817016	-	1070	chr14	71189245	71190424	-	1179	1070	1179	0.04847	0	0	3.51218
mlclust_847	chr12	82882344	82884018	+	1674	chr14	71276648	71278841	+	2193	1674	2193	0.13421	0	0.017672	0.336363
mlclust_848	chr12	83741187	83742691	+	1504	chr14	72419374	72419959	+	585	1504	585	0.43992	0	0.020745	0
mlclust_849	chr12	84827084	84829972	+	2888	chr14	73359105	73362156	+	3051	2888	3051	0.02745	0	0.410386	0.021386
mlclust_850	chr12	85391161	85393394	-	2233						2233			0	0.138101
mlclust_851	chr12	85555314	85557087	-	1773	chr14	74249792	74251616	-	1824	977	1003	0.01313	117	0.567076	0.128634
mlclust_852	chr12	86441727	86443297	-	1570	chr14	75334531	75335864	-	1333	1570	1333	0.08164	159	0.0861	0
mlclust_853	chr12	86938539	86940122	-	1583	chr14	75892886	75894494	-	1608	1583	1608	0.00783	0	0.187175	1.3845
mlclust_854	chr12	88035511	88036635	+	1124	chr14	77248195	77249363	+	1168	1124	1168	0.0192	0	0.058613	7.78279
mlclust_855	chr12	88232353	88233517	-	1164	chr14	77503623	77504809	-	1186	971	939	0.01675	0	0.146856	0.105748
mlclust_856	chr12	88286864	88288094	-	1230	chr14	77562726	77564338	-	1612	1230	1612	0.13441	192	0.116364	0.275239
mlclust_857	chr12	91679203	91680764	-	1561						1561			0	0.018476
mlclust_858	chr12	91976640	91989133	+	12493	chr14	80677731	80690184	+	12453	3040	2747	0.05063	147	1.48071	0.394189
mlclust_859	chr12	92208388	92209958	+	1570	chr14	80921467	80922963	+	1496	411	226	0.29042	0	0.072092	0.148359
mlclust_860	chr12	92794415	92796495	-	2080	chr14	81642552	81644814	-	2262	2079	2258	0.04127	0	0.044499	15.3439
mlclust_861	chr12	97858889	97860516	-	1627						1627			102	0.196918
mlclust_862	chr12	99820573	99824186	+	3613	chr14	88795559	88798513	+	2954	3612	2953	0.10038	129	0	0.022709
mlclust_863	chr12	100399486	100400919	-	1433	chr14	89587942	89589268	-	1326	1077	982	0.04614	105	0.071336	0.053155
mlclust_864	chr12	100631325	100632284	+	959	chr14	89883610	89884749	+	1139	959	1139	0.0858	141	0.252753	0.456395
mlclust_865	chr12	100703350	100706009	-	2659	chr14	89968711	89970172	-	1461	2644	1325	0.33233	0	1.45371	0.126586
mlclust_866	chr12	100807949	100809624	+	1675	chr14	90090904	90093315	+	2411	1675	2411	0.18013	0	0.035379	0.02165
mlclust_867	chr12	100877925	100880134	-	2209	chr14	90186169	90188265	-	2096	2209	2096	0.02625	0	0.039169	0.037356
mlclust_868	chr12	103072298	103073831	-	1533	chr14	92432411	92434249	-	1838	1533	1838	0.09048	90	0.022588	3.59091
mlclust_869	chr12	103150897	103153863	+	2966	chr14	92505888	92506931	+	1043	2349	1043	0.38502	99	0.414334	1.42752
mlclust_870	chr12	103508600	103510701	+	2101	chr14	92965176	92967967	+	2791	2101	2791	0.14105	0	0.076246	1.77164
mlclust_871	chr12	103678932	103679982	+	1050	chr14	93217496	93218752	+	1256	1050	1256	0.08933	0	0.032978	0.318932
mlclust_872	chr12	106103539	106109734	+	6195	chr14	95786588	95791701	+	5113	621	1127	0.28947	105	0.327095	0.254738
mlclust_873	chr12	106498455	106501220	+	2765	chr14	96245683	96247696	+	2013	2764	1467	0.30655	0	0.077276	0
mlclust_874	chr12	106728427	106731305	+	2878	chr14	96556309	96560234	+	3925	2878	3925	0.1539	159	0.046969	13.0871
mlclust_875	chr12	107322579	107326864	+	4285	chr14	97358565	97365960	+	7395	4285	7395	0.26627	0	0.006731	0.027204
mlclust_876	chr12	107396986	107398338	+	1352	chr14	97472344	97473132	+	788	1352	788	0.26355	204	0.019937	0.563052
mlclust_877	chr12	107680862	107685873	-	5011	chr14	97838987	97844470	-	5483	1024	911	0.0584	180	0.053841	0
mlclust_878	chr12	107686041	107687579	+	1538	chr14	97844817	97845496	+	679	1534	639	0.41187	117	0	0
mlclust_879	chr12	107933925	107954572	-	20647	chr14	98110521	98122617	-	12096	2028	1425	0.17463	333	0.086989	0.069608
mlclust_880	chr12	108285482	108286516	+	1034	chr14	98553693	98554666	+	973	1034	973	0.03039	0	0	0.013412
mlclust_881	chr12	108309108	108311664	-	2556	chr14	98589885	98592139	-	2254	2556	2254	0.06279	0	0.013804	0
mlclust_882	chr12	108961951	108973698	-	11747	chr14	99383202	99399127	-	15925	1444	1294	0.05478	0	0.036979	0.010962
mlclust_883	chr12	109148613	109149885	-	1272	chr14	99635632	99636858	-	1226	1271	1225	0.01843	105	0.027244	12.7531
mlclust_884	chr12	109567685	109569077	+	1392	chr14	100145948	100146620	+	672	1392	672	0.34884	0	0	0.498947
mlclust_885	chr12	110028244	110030953	-	2709	chr14	100699845	100704958	-	5113	2708	5112	0.30742	0	0.014185	0.041624
mlclust_886	chr12	110056176	110058356	+	2180	chr14	100746399	100749127	+	2728	2180	2728	0.11165	0	0.016185	11.5728
mlclust_887	chr12	110802542	110803772	+	1230	chr14	101319495	101320606	+	1111	1230	1111	0.05083	0	0.048179	8.19811
mlclust_888	chr12	110805188	110806519	+	1331	chr14	101322113	101323562	+	1449	1331	1449	0.04245	126	0.022261	8.88863
mlclust_889	chr12	110806837	110809933	+	3096	chr14	101323918	101327359	+	3441	1228	1247	0.00768	0	0.046621	17.6325
mlclust_890	chr12	110834014	110835306	+	1292	chr14	101351517	101352791	+	1274	1292	1274	0.00701	0	0.165317	0.231594
mlclust_891	chr12	110871007	110874483	+	3476	chr14	101402091	101406117	+	4026	3475	2812	0.10546	0	0.017053	0.301091
mlclust_892	chr12	110907078	110909200	+	2122	chr14	101428594	101431541	+	2947	2122	2947	0.16275	0	0	0.330828
mlclust_893	chr12	110973190	110987665	+	14475	chr14	101521834	101539271	+	17437	4197	4799	0.06692	114	0.07434	1.19488
mlclust_894	chr12	111086627	111089482	+	2855						2774	232	0.84564	0	0.010855
mlclust_895	chr12	111389863	111396287	-	6424	chr14	101899269	101901468	-	2199	1623	578	0.47478	117	0	0.067306
mlclust_896	chr12	111425785	111428476	+	2691	chr14	101923814	101926540	+	2726	2691	2726	0.00646	0	0	0.019148
mlclust_897	chr12	111474701	111476844	+	2143	chr14	101978483	101980274	+	1791	2143	1791	0.08948	333	0.031539	0.028651
mlclust_898	chr12	111820390	111821271	+	881	chr14	102393441	102394313	+	872	881	872	0.00513	0	0.153436	19.8969
mlclust_899	chr12	111828721	111829790	-	1069	chr14	102412362	102414389	-	2027	1069	2027	0.30943	0	0.031613	0.008271
mlclust_900	chr12	111837992	111840173	-	2181	chr14	102428811	102431643	-	2832	2180	2831	0.12991	144	2.5919	0.24634
mlclust_901	chr12	111934173	111935326	+	1153	chr14	102553008	102553701	+	693	1145	686	0.25068	96	0.525962	0.491484
mlclust_902	chr12	111975471	111976563	-	1092	chr14	102605297	102606584	-	1287	1092	1287	0.08197	0	0.937967	0.716437
mlclust_903	chr12	112079238	112082014	+	2776	chr14	102771558	102778794	+	7236	1652	180	0.80349	0	0.614788	0.072498
mlclust_904	chr12	112224193	112225328	-	1135	chr14	102980788	102981489	-	701	1135	701	0.23638	0	0.052211	0.037231
mlclust_905	chr12	112809123	112812567	-	3444	chr14	103848007	103851578	-	3571	3444	3571	0.0181	141	0.053827	0.064437
mlclust_906	chr12	113180201	113182695	-	2494	chr14	104353070	104354984	-	1914	1731	734	0.40446	0	0.041189	0.034955
mlclust_907	chr12	113629736	113644005	-	14269	chr14	104924322	104944168	-	19846	3578			105	0.016122
mlclust_908	chr12	113919483	113920957	+	1474	chr14	105269549	105271045	+	1496	1472	1494	0.00742	0	0.023524	1.5583
mlclust_909	chr12	114113426	114114025	-	599	chr14	105555049	105555259	-	210	599	210	0.48084	0	0	0.549785
mlclust_910	chr12	114193759	114196609	-	2850	chr14	105668747	105673936	-	5189	2850	5189	0.29096	0	0.07428	0.013669
mlclust_911	chr12	114238174	114240135	+	1961	chr14	105766764	105767580	+	816	1961	816	0.41232	0	0.24721	0.511747
mlclust_912	chr12	114388600	114389569	-	969	chr14	105951758	105952939	-	1181	969	1181	0.0986	0	0.145646	0.19552
mlclust_913	chr12	119541586	119544688	+	3102	chr7	21462455	21465943	-	3488	3102	3488	0.05857	0	0	0.026189
mlclust_914	chr12	119881265	119883924	+	2659	chr7	21086728	21089179	-	2451	2659	2451	0.0407	102	0	0
mlclust_915	chr12	120396505	120397436	-	931	chr7	20454372	20455378	+	1006	931	1006	0.03872	0	0.028446	14.3149
mlclust_916	chr13	3477488	3487807	+	10319	chr2	100101190	100106448	-	5258	5272	2083	0.43358	144	0.021883	0.251972
mlclust_917	chr13	3605939	3608039	-	2100	chr10	5728828	5731855	+	3027	2036	1857	0.04598	0	0.026227	0.269689
mlclust_918	chr13	6529840	6530490	+	650	chr10	3237779	3238363	-	584	650	584	0.05348	0	0	0.022345
mlclust_919	chr13	9102234	9103318	+	1084	chr10	965310	965948	-	638	1084	638	0.259	0	0.065773	0.466915
mlclust_920	chr13	9172257	9173650	+	1393	chr10	855483	856818	-	1335	1392	1334	0.02128	0	0.149255	8.76454
mlclust_921	chr13	9776744	9777702	-	958	chr10	171971	173251	+	1280	958	1280	0.14388	0	0.05755	0.031724
mlclust_922	chr13	11645371	11646493	-	1122	chr1	237996144	237997285	+	1141	1122	1141	0.0084	93	0.205424	101.954
mlclust_923	chr13	12198003	12200591	+	2588	chr1	237204371	237206615	-	2244	2588	2244	0.07119	159	1.02418	0.484099
mlclust_924	chr13	12895447	12897652	+	2205						2205			0	0.04606
mlclust_925	chr13	15551818	15553128	-	1310	chr7	42279771	42280399	+	628	1310	628	0.35191	0	0.026933	0.123268
mlclust_926	chr13	15818983	15821856	+	2873	chr7	42000549	42003546	-	2997	2873	2997	0.02112	0	0.037172	8.45376
mlclust_927	chr13	15873496	15894463	-	20967	chr7	41961112	41968721	+	7609	1123	1063	0.02745	0	0.226097	0.066723
mlclust_928	chr13	15905380	16115193	-	209813	chr7	41733588	41947936	+	214348	4298	1331	0.52709	96	10.3966	2.50091
mlclust_929	chr13	16120652	16123440	+	2788	chr7	41724713	41727700	-	2987	2788	2987	0.03446	0	0.051337	5.44351
mlclust_930	chr13	17800436	17801698	-	1262	chr7	40143076	40143696	+	620	1262	620	0.34113	0	0.458712	0.167324
mlclust_931	chr13	17802559	17803918	-	1359						1358			0	0.532159
mlclust_932	chr13	18176780	18192036	-	15256	chr7	39531264	39538695	+	7431	859	244	0.55757	198	0.430796	0.27483
mlclust_933	chr13	18213074	18214000	-	926	chr7	39507206	39508068	+	862	923	862	0.03417	0	0.038226	0.836286
mlclust_934	chr13	19269892	19270359	+	467	chr7	38369946	38370440	-	494	366	369	0.00408	0	0	2.7818
mlclust_935	chr13	21102501	21128486	+	25985	chr7	36527394	36563952	-	36558	1626	925	0.27479	147	0.06568	55.8374
mlclust_936	chr13	21569491	21571312	-	1821	chr6	28219401	28220748	+	1347	1821	1347	0.14962	0	0.247201	0.494081
mlclust_937	chr13	21605091	21606856	-	1765	chr6	28125943	28127237	+	1294	1765	1294	0.15397	0	0.020198	6.17893
mlclust_938	chr13	22109374	22112607	+	3233	chr6	27190557	27198935	-	8378	3042	8132	0.45552	0	0.017553	0.005233
mlclust_939	chr13	22141382	22143319	-	1937						1937			0	0.015545
mlclust_940	chr13	23370218	23374136	+	3918						1426			0	0.074891
mlclust_941	chr13	23515853	23517120	+	1267	chr6	26595473	26597030	-	1557	1264	1455	0.07025	0	0.030391	0.008969
mlclust_942	chr13	23519844	23522886	-	3042	chr6	26572307	26576564	+	4257	3042	4257	0.16646	102	0.010829	0.150206
mlclust_943	chr13	23533691	23537804	-	4113	chr6	26545244	26547237	+	1993	4113	1993	0.3472	201	0.007843	28.1076
mlclust_944	chr13	23618879	23622812	-	3933	chr6	26285925	26299179	+	13254	1080	1178	0.0434	0	0.426824	0.218011
mlclust_945	chr13	23645130	23648003	-	2873	chr6	26234408	26238120	+	3712	2873	3712	0.12741	765	3.99464	0.271325
mlclust_946	chr13	23928803	23930259	+	1456	chr6	25875245	25876752	-	1507	1035	1069	0.01616	189	0	0
mlclust_947	chr13	24396648	24398412	-	1764	chr6	25233407	25233798	+	391	1764	391	0.63712	108	0.020002	0
mlclust_948	chr13	24997468	24999149	+	1681	chrX	71092246	71092578	+	332	1477	328	0.63657	0	0.095553	0
mlclust_949	chr13	25262590	25263700	+	1110	chr6	24217567	24219251	-	1684	1108	813	0.15357	156	0.091663	0
mlclust_950	chr13	25520037	25521996	-	1959	chr6	23990311	23990992	+	681	1959	681	0.48409	150	0.017251	0
mlclust_951	chr13	26861261	26864596	+	3335	chr6	22568366	22570400	-	2034	3335	2034	0.24232	0	0	2.74592
mlclust_952	chr13	28552642	28977221	-	424579	chr6	21666666	22111265	+	444599	10332	8382	0.1042	141	1.13399	1.79523
mlclust_953	chr13	29107324	29107990	+	666	chr6	21522195	21522915	-	720	666	720	0.03896	0	0.053527	0.325979
mlclust_954	chr13	29108161	29120666	+	12505	chr6	21508097	21522078	-	13981	682	479	0.17485	0	0.521217	0.32692
mlclust_955	chr13	29124262	29126901	+	2639	chr6	21500935	21502853	-	1918	2639	1918	0.15822	162	0	0.020411
mlclust_956	chr13	29285068	29287600	+	2532	chr6	21335223	21340787	-	5564	2532	5564	0.37451	96	0.013676	0.009381
mlclust_957	chr13	30095354	30098227	+	2873	chr6	20374821	20377919	-	3098	2872	3098	0.03786	0	0.012285	0.004574
mlclust_958	chr13	31417802	31422637	-	4835	chr6	1062792	1067132	-	4340	2819	1858	0.20547	105	0.018942	0.105352
mlclust_959	chr13	31452888	31500791	-	47903	chr6	1098605	1136836	-	38231	1231	805	0.20923	117	0.65066	6.92721
mlclust_960	chr13	31706536	31717661	-	11125	chr6	1378504	1389899	-	11395	1525	1561	0.01167	0	0.07565	0.281017
mlclust_961	chr13	32817719	32818841	-	1122	chr6	2690028	2690517	-	489	1121	488	0.39341	0	0.753664	0.028738
mlclust_962	chr13	34027900	34052050	+	24150						777	53	0.87229	144	2.63373
mlclust_963	chr13	34176023	34205141	-	29118	chr6	3176490	3210278	-	33788	1033	547	0.30759	237	0.208969	3.09548
mlclust_964	chr13	34744791	34758643	+	13852	chr6	3752341	3766985	+	14644	1090	631	0.26671	0	0.372708	14.1361
mlclust_965	chr13	36673959	36675395	-	1436	chr6	5854720	5856090	-	1370	1436	1370	0.02352	249	0.131392	0.009789
mlclust_966	chr13	37871608	37873311	+	1703	chr6	7053646	7055004	+	1358	1702	826	0.34652	138	0.243338	0.124399
mlclust_967	chr13	38063270	38064393	-	1123	chr6	7280208	7281344	-	1136	1119	1051	0.03134	0	0.115314	0.526383
mlclust_968	chr13	39052487	39058166	+	5679	chr6	8435978	8455160	+	19182	1370	3434	0.42964	123	0.48023	0.193805
mlclust_969	chr13	39867159	39886753	-	19594	chr6	9333387	9351641	-	18254	453	355	0.12129	0	4.44308	0.047224
mlclust_970	chr13	40737975	40740018	-	2043	chr6	10307314	10310094	-	2780	2039	2777	0.15324	0	0.030248	0
mlclust_971	chr13	41369989	41371936	+	1947	chr6	11136800	11138959	+	2159	1946	2155	0.05096	0	0.044463	14.8976
mlclust_972	chr13	41734881	41736723	+	1842	chr6	11581987	11583754	+	1767	1841	1766	0.02079	0	0.166928	9.59741
mlclust_973	chr13	42295101	42299229	+	4128	chr6	12183201	12185571	+	2370	4127	2370	0.27043	210	0	0.011971
mlclust_974	chr13	43384271	43387098	-	2827	chr6	13470452	13473838	-	3386	2827	3386	0.08997	0	0.035926	0.222039
mlclust_975	chr13	44281128	44285563	-	4435	chr6	14601143	14603760	-	2617	4435	2617	0.2578	225	0.008662	0.044596
mlclust_976	chr13	44288957	44311856	-	22899	chr6	14608889	14629358	-	20469	4016	3687	0.04271	0	2.24583	0.189924
mlclust_977	chr13	44344828	44348039	-	3211	chr6	14657157	14664627	-	7470	1689	686	0.42232	243	0.022744	0.454923
mlclust_978	chr13	44889642	44892970	+	3328	chr6	15329374	15333080	+	3706	3327	3706	0.05389	0	0.008892	0.045932
mlclust_979	chr13	45195325	45213096	+	17771	chr6	15781871	15795713	+	13842	509	457	0.05383	0	0.190133	0.088854
mlclust_980	chr13	46034537	46036407	-	1870	chr6	16738082	16739807	-	1725	1870	1725	0.04033	0	0.018868	2.368
mlclust_981	chr13	47762918	47763761	+	843	chr6	18990810	18991965	+	1155	692	978	0.17126	0	0	0.01384
mlclust_982	chr13	48005803	48029670	+	23867	chr6	19382929	19428334	+	45405	3502	1762	0.33055	0	0.02015	0.53876
mlclust_983	chr13	48127141	48137840	+	10699	chr6	19558743	19565742	+	6999	2996	2527	0.08492	0	0.069229	0.042851
mlclust_984	chr13	48139599	48357992	-	218393	chr6	19569499	19839146	-	269647	2816	2831	0.00266	0	4.08252	8.67302
mlclust_985	chr13	48367786	48369253	-	1467	chr6	19851005	19852223	-	1218	667	610	0.04464	129	1.46932	0.04598
mlclust_986	chr13	48972576	48973717	+	1141	chr9	96331174	96331317	-	143	1140	143	0.77708	0	0.1038	0.816144
mlclust_987	chr13	49063548	49065274	+	1726	chr9	96211392	96213806	-	2414	1393	2036	0.18752	0	0.184946	3.098
mlclust_988	chr13	49354412	49357162	+	2750						2038			0	3.2962
mlclust_989	chr13	49436231	49436745	-	514	chr9	95527350	95528002	+	652	514	652	0.11835	0	0.05244	0.060044
mlclust_990	chr13	49514133	49516406	-	2273	chr9	95432635	95433036	+	401	2273	401	0.70007	225	0.11746	1.01263
mlclust_991	chr13	50232437	50242039	+	9602						1220	113	0.83046	138	0.115681
mlclust_992	chr13	50848761	50860617	-	11856	chr9	90497927	90503618	-	5691	1185			0	0.057037
mlclust_993	chr13	51193116	51196092	-	2976	chr9	90999406	91003168	-	3762	2974	3760	0.11672	0	0.159086	0.576124
mlclust_994	chr13	51214816	51217201	+	2385	chr9	91033576	91034518	+	942	2385	942	0.43372	93	0.012625	1.00774
mlclust_995	chr13	51478812	51479550	-	738						738			0	0.072354
mlclust_996	chr13	51518761	51520955	-	2194	chr9	91620692	91622929	-	2237	2194	2237	0.0097	0	0.161803	12.9426
mlclust_997	chr13	52192109	52219527	+	27418	chr9	92686228	92699326	+	13098	3270	395	0.78445	273	0.084715	0.099111
mlclust_998	chr13	52270794	52271433	+	639	chr9	92781924	92782259	+	335	639	335	0.31211	0	0	0
mlclust_1000	chr13	52824738	52830977	-	6239	chr1	174973761	174979921	+	6160	2301	6440	0.47352	99	0.022069	7.2395
mlclust_1001	chr13	53489057	53550999	+	61942						5004	2034	0.42199	108	0.166077
mlclust_1002	chr13	53743953	53745449	+	1496	chr5	173930285	173931865	-	1580	537	535	0.00187	0	0	0.250686
mlclust_1003	chr13	53871995	53874342	+	2347	chr5	174363919	174369065	+	5146	682	462	0.19231	102	0.084579	0.16074
mlclust_1004	chr13	54612606	54613503	+	897						896			0	0.039787
mlclust_1005	chr13	54843312	54843693	+	381	chr5	176028650	176028822	+	172	381	172	0.37794	0	0.778206	0.292406
mlclust_1006	chr13	55014595	55015835	+	1240	chr5	176197235	176198121	+	886	482	151	0.52291	0	0	0
mlclust_1007	chr13	55028123	55031566	-	3443	chr5	176208581	176211445	-	2864	1667	764	0.37145	120	0.080846	0
mlclust_1008	chr13	55415188	55417116	+	1928	chr5	176722568	176724424	+	1856	1928	1856	0.01903	120	0.284443	7.08864
mlclust_1009	chr13	56122411	56126352	+	3941	chr5	134597919	134600499	+	2580	3938	2577	0.2089	0	0.007923	0.064777
mlclust_1010	chr13	56447596	56451529	+	3933	chr5	134979414	134982580	+	3166	3933	3166	0.10804	216	0	0.055308
mlclust_1011	chr13	56696897	56698003	+	1106	chr5	135351101	135351573	+	472	508	118	0.623	0	0.069454	0
mlclust_1012	chr13	58101898	58103234	-	1336	chr5	136953519	136954816	-	1297	1336	1297	0.01481	0	2.01272	2.4499
mlclust_1013	chr13	58199648	58200701	-	1053	chr5	137059379	137059920	-	541	1048	537	0.3224	120	0	0.062438
mlclust_1014	chr13	58227240	58228431	-	1191	chr5	137087262	137088464	-	1202	1190	1202	0.00502	0	0.198877	47.8127
mlclust_1015	chr13	58248309	58251053	+	2744						849			147	0.318439
mlclust_1016	chr13	58256501	58258936	-	2435	chr5	137110220	137111919	-	1699	1141	750	0.20677	0	0.177709	0.107291
mlclust_1017	chr13	58842434	58863672	-	21238	chr9	87201870	87225621	-	23751	1626	1825	0.05766	0	4.6653	0.014833
mlclust_1018	chr13	59520749	59524260	+	3511	chr9	88100885	88104447	+	3562	3511	3562	0.00721	0	0.101245	0
mlclust_1019	chr13	59547558	59549007	-	1449	chr9	88157310	88158020	-	710	1447	708	0.34292	0	0	2.20213
mlclust_1020	chr13	59640448	59642967	-	2519						2519			0	0
mlclust_1021	chr13	59681536	59686584	-	5048	chr9	88553616	88555914	-	2298	3151	121	0.92604	0	0.033892	1.29417
mlclust_1022	chr13	59835005	59836571	+	1566						1339			0	0.126192
mlclust_1023	chr13	59871325	59873482	+	2157	chr9	88902076	88902892	+	816	1577	816	0.31801	0	5.28219	3.85054
mlclust_1024	chr13	63230502	63231603	+	1101						1101			120	5.72478
mlclust_1025	chr13	63668405	63669362	-	957	chr9	98272382	98273308	-	926	957	926	0.01646	0	0.24769	0.746897
mlclust_1026	chr13	63915484	63916421	-	937	chr9	98636560	98637737	-	1177	937	1177	0.11353	0	0	0.975668
mlclust_1027	chr13	64031085	64033570	+	2485						2485			147	0.279343
mlclust_1028	chr13	64197616	64198616	-	1000	chr9	99082852	99083180	-	328	1000	328	0.50602	0	0.461166	2.48072
mlclust_1029	chr13	67108189	67109094	+	905	chr8	97358887	97359718	+	831	905	831	0.04263	0	0.708033	0.077186
mlclust_1030	chr13	67654169	67664946	+	10777						1363	383	0.56128	135	1.2273
mlclust_1031	chr13	68589824	68590978	-	1154						1154			165	0
mlclust_1032	chr13	69155499	69157066	+	1567	chr5	7375589	7376062	-	473	1567	473	0.53627	0	0	0
mlclust_1033	chr13	69280106	69282838	+	2732	chr5	7209785	7211732	-	1947	666	718	0.03757	0	0	0.017867
mlclust_1034	chr13	69673721	69674733	+	1012	chr5	6712091	6713131	-	1040	1012	1040	0.01365	0	0.03255	0.074009
mlclust_1035	chr13	70098775	70102315	+	3540	chr5	6224234	6230353	-	6119	2057	5311	0.44164	120	0.016429	0.027898
mlclust_1036	chr13	70142927	70167226	-	24299	chr5	6155685	6188268	+	32583	1044	1242	0.08661	0	0.298509	0.215969
mlclust_1037	chr13	70789021	70794857	+	5836	chr5	5402295	5411592	-	9297	1871	1681	0.05349	126	0.094289	0.062104
mlclust_1038	chr13	71287324	71288563	+	1239	chr5	4646866	4648138	-	1272	1239	1272	0.01314	0	0	0.030777
mlclust_1039	chr13	71846502	72094000	-	247498	chr5	3603292	3967718	+	364426	3386	2520	0.14663	186	0.38573	1.20206
mlclust_1040	chr13	72504773	72509095	-	4322	chr5	3092376	3098290	+	5914	4322	5914	0.15553	0	0.013346	0.002207
mlclust_1041	chr13	72605424	72609251	+	3827	chr5	2963651	2967815	-	4164	3820	4087	0.03377	0	0.088467	0.092595
mlclust_1042	chr13	72760913	72762760	-	1847	chr5	2755422	2757661	+	2239	1847	2239	0.09594	126	0.038206	0.093253
mlclust_1043	chr13	72947048	72954211	-	7163	chr5	2537021	2541558	+	4537	585	97	0.71554	108	0.059192	0
mlclust_1044	chr13	74258274	74259445	-	1171	chr5	524200	524827	+	627	1169	627	0.30178	0	0.747599	0.214826
mlclust_1045	chr13	74307245	74308625	-	1380						1380			99	0.594911
mlclust_1046	chr13	74644259	74715551	-	71292						1682			0	3.52013
mlclust_1047	chr13	75837609	75844620	-	7011	chr5	95297912	95304753	+	6841	365	102	0.56317	0	0.289996	2.10374
mlclust_1048	chr13	76705829	76708448	+	2619	chr5	94424380	94426545	-	2165	2618	2165	0.09471	0	0.025165	0.061948
mlclust_1049	chr13	76718857	76721185	+	2328	chr5	94416070	94417349	-	1279	2328	1279	0.29082	0	0	1.01885
mlclust_1051	chr13	78305817	78308294	+	2477	chr5	92950923	92953406	-	2483	2476	2482	0.00121	0	0.054595	1.18091
mlclust_1052	chr13	78345929	78347602	+	1673	chr5	92910433	92912176	-	1743	1672	1743	0.02079	0	0.25549	0.30696
mlclust_1053	chr13	78454743	78458660	+	3917						3915			0	0.008632
mlclust_1054	chr13	81080319	81087858	+	7539	chr5	90598612	90607697	-	9085	973	601	0.23634	180	0.066309	12.567
mlclust_1055	chr13	81118730	81123134	+	4404	chr5	90547489	90548437	-	948	3040	948	0.52457	141	0	0.054181
mlclust_1056	chr13	81917771	81922768	-	4997	chr5	89704886	89711372	+	6486	4933	6402	0.1296	99	0.365581	0.253711
mlclust_1057	chr13	82066783	82068686	-	1903	chr5	89576263	89577809	+	1546	1901	1357	0.16697	0	0.015172	0.019949
mlclust_1058	chr13	83804876	83806682	+	1806	chr5	88014058	88015881	-	1823	1806	1823	0.00468	0	0.131251	42.4219
mlclust_1059	chr13	83861149	83863028	+	1879	chr5	87978471	87980589	-	2118	1879	2118	0.05979	0	0.094614	0.514495
mlclust_1060	chr13	83863046	83869187	-	6141	chr5	87971987	87978454	+	6467	2011	2326	0.07263	105	4.61171	1.20365
mlclust_1061	chr13	83867710	83877186	+	9476	chr5	87963972	87973499	-	9527	3410	3401	0.00132	0	0.512657	0.773903
mlclust_1062	chr13	83874313	83878140	-	3827	chr5	87963036	87966851	+	3815	3827	3815	0.00157	0	0.960048	0.395496
mlclust_1063	chr13	83900858	83902833	+	1975						1880	690	0.46304	0	1.44768
mlclust_1064	chr13	84164907	84204377	-	39470	chr5	87688036	87732485	+	44449	3397	5371	0.22514	225	0.251504	1.16425
mlclust_1065	chr13	84359185	84361780	-	2595	chr5	87564800	87569031	+	4231	2557	4203	0.24349	150	0	0.506568
mlclust_1066	chr13	84488908	84491432	+	2524	chr5	87432363	87436206	-	3843	2524	3843	0.20716	138	0.063468	0.187582
mlclust_1067	chr13	84492983	84495462	+	2479	chr5	87428647	87430693	-	2046	2479	2046	0.09569	0	0.012147	0.057357
mlclust_1068	chr13	90247456	90248674	+	1218	chr5	82348184	82348702	-	518	1218	518	0.40323	0	0.024288	0.780092
mlclust_1069	chr13	91398995	91414559	+	15564	chr5	81220306	81230707	-	10401	934	1020	0.04401	0	166.76	0
mlclust_1070	chr13	91508594	91527690	-	19096	chr5	81132082	81149911	+	17829	2807	2885	0.0137	0	0.142819	0.195256
mlclust_1071	chr13	93157749	93159085	+	1336	chr5	79923044	79924660	-	1616	1336	1616	0.09485	0	0.020634	2.38651
mlclust_1072	chr13	93184971	93197179	-	12208	chr5	79864774	79891684	+	26910	923	1078	0.07746	0	0.475976	0.062206
mlclust_1073	chr13	93300857	93302761	+	1904	chr5	79701653	79703739	-	2086	1904	2086	0.04561	0	0.032393	0.062558
mlclust_1074	chr13	93614714	93618367	+	3653	chr5	79284030	79287089	-	3059	1809	1490	0.0967	0	0	0.65433
mlclust_1075	chr13	93624895	93628171	+	3276	chr5	79272552	79277383	-	4831	3275	4830	0.19186	0	0.048914	4.2522
mlclust_1076	chr13	94071468	94073323	-	1855	chr5	78810763	78812807	+	2044	1855	2044	0.04847	0	0.246379	0.032807
mlclust_1077	chr13	94540903	94542149	-	1246	chr5	78280573	78282343	+	1770	1246	1770	0.17374	144	0.379711	0.24626
mlclust_1078	chr13	97408920	97410117	+	1197	chr5	74666926	74668133	-	1207	1197	1207	0.00416	0	0.049429	13.0159
mlclust_1079	chr13	97417790	97419370	-	1580	chr5	74657479	74658359	+	880	1580	880	0.28455	0	0.350654	4.50449
mlclust_1080	chr13	98053136	98055889	+	2753	chr5	73892277	73894377	-	2100	1033	106	0.81387	0	0.030204	0
mlclust_1081	chr13	98560518	98563213	-	2695	chr5	73379977	73382518	+	2541	2693	2541	0.02904	0	0	0
mlclust_1082	chr13	98635795	98646617	-	10822	chr5	73258516	73269704	+	11188	2215	2538	0.06796	0	0.072322	0.042457
mlclust_1083	chr13	98668549	98669546	-	997	chr5	73236884	73237817	+	933	997	933	0.03316	0	0.032356	3.53703
mlclust_1084	chr13	99777065	99780071	+	3006	chr5	72003052	72008778	-	5726	3005	5661	0.30649	0	0.035539	0.012516
mlclust_1085	chr13	99846482	99857876	-	11394	chr5	71910920	71921132	+	10212	718	653	0.04741	0	0.835387	0.098226
mlclust_1086	chr13	100411928	100412758	+	830	chr5	71272962	71273893	-	931	830	931	0.05735	93	0	0
mlclust_1087	chr13	101602894	101604155	+	1261	chr5	68387745	68390326	-	2581	1261	2581	0.34357	0	0.477579	0.110295
mlclust_1088	chr13	102024273	102063351	+	39078	chr5	67963385	68003473	-	40088	1285	949	0.1504	0	2.7732	0.298062
mlclust_1089	chr13	102316352	102318088	-	1736	chr5	67721150	67723904	+	2754	1736	2754	0.22673	165	0.14626	0.019705
mlclust_1090	chr13	102625445	102626306	+	861	chr5	67411716	67412739	-	1023	545	657	0.09318	0	0	0
mlclust_1091	chr13	103129223	103129934	+	711	chr5	66806883	66806987	-	104	711	104	0.74479	0	0.04633	0
mlclust_1092	chr13	103333141	103360240	-	27099	chr5	66589271	66621341	+	32070	3602	1341	0.45741	0	0.042294	0.062747
mlclust_1093	chr13	107812632	107823601	+	10969	chr5	61594424	61601838	-	7414	3006	805	0.57754	90	0.088818	0.097264
mlclust_1094	chr13	107853774	107877877	+	24103	chr5	61542731	61557567	-	14836	843	794	0.02993	162	0.903585	0.24498
mlclust_1095	chr13	108259901	108269268	+	9367	chr5	61096802	61105383	-	8581	5174	4407	0.08005	0	0.006819	0.022825
mlclust_1096	chr13	108335110	108337790	+	2680	chr5	61026511	61029757	-	3246	2680	3246	0.09551	0	0	0.315047
mlclust_1097	chr13	108605660	108606896	-	1236	chr5	60731628	60732553	+	925	1236	925	0.14391	0	0.064279	0.17593
mlclust_1098	chr13	108642170	108642935	-	765	chr5	60670348	60674131	+	3783	765	3783	0.66359	111	0.113104	0.22899
mlclust_1099	chr13	108786478	108795240	+	8762	chr5	60507730	60510989	-	3259	3118	1715	0.2903	0	0.079211	0.031416
mlclust_1100	chr13	108832314	108834311	-	1997	chr5	60458797	60461959	+	3162	1996	3161	0.22591	0	0.050883	0.178566
mlclust_1101	chr13	108986536	108989474	+	2938	chr5	60163365	60164874	-	1509	2938	1509	0.32134	0	0.039225	0.552578
mlclust_1102	chr13	109286011	109288364	+	2353	chr5	59784369	59786522	-	2153	2353	2153	0.04439	0	0.074974	1.89133
mlclust_1103	chr13	111672618	111694054	-	21436	chr5	57140036	57159009	+	18973	1178	1127	0.02213	0	0.086064	0.029751
mlclust_1104	chr13	112955665	112962276	-	6611	chr5	55685334	55699236	+	13902	1135	1127	0.00354	0	0.02717	0.191227
mlclust_1105	chr13	113003479	113004864	+	1385	chr5	55614971	55616389	-	1418	1385	1418	0.01177	0	0	0
mlclust_1106	chr13	113205145	113207570	-	2425	chr5	55366391	55368072	+	1681	1602	427	0.5791	0	0.022024	0.157723
mlclust_1107	chr13	113868313	113869355	-	1042	chr5	54423831	54424846	+	1015	1042	1015	0.01313	0	0.033861	0.050845
mlclust_1108	chr13	113926292	113934220	+	7928	chr5	54354483	54359337	-	4854	442	101	0.62799	219	3.41342	0.140449
mlclust_1109	chr13	114236495	114293052	-	56557	chr5	53951713	54004295	+	52582	2567	2503	0.01262	0	0.678612	0.128866
mlclust_1110	chr13	115031085	115032848	-	1763						1763			0	0.040442
mlclust_1111	chr13	115397435	115488030	+	90595	chr5	52571352	52644280	-	72928	1412	1292	0.04438	156	0.099951	0.186649
mlclust_1112	chr13	115743353	115745940	-	2587	chr5	52252447	52255033	+	2586	2578	2578	0	0	0.09849	2.92457
mlclust_1113	chr13	117100050	117102990	+	2940	chr5	50676195	50679086	-	2891	2936	2887	0.00841	0	0	0.027121
mlclust_1114	chr13	117590901	117626985	-	36084	chr5	50148643	50169543	+	20900	1786	526	0.54498	0	0.113732	0.3466
mlclust_1115	chr13	117639650	117641035	-	1385	chr5	50140984	50142348	+	1364	1385	1364	0.00764	0	0.027736	4.20329
mlclust_1116	chr13	117805809	117808215	-	2406	chr5	49968061	49969688	+	1627	2406	1627	0.19316	0	0.015966	0.034875
mlclust_1117	chr13	117918831	117924691	+	5860	chr5	49824737	49833994	-	9257	1622	1679	0.01727	141	0.042697	0.008449
mlclust_1118	chr13	118774036	118776217	+	2181	chr5	45254997	45255647	-	650	2181	650	0.5408	0	0.015495	3.58505
mlclust_1119	chr13	119501507	119503302	-	1795	chr5	44389689	44391425	+	1736	1795	1736	0.01671	0	0.031895	0.073541
mlclust_1120	chr13	120245942	120249127	+	3185	chr5	43523434	43527450	-	4016	3185	4016	0.1154	0	2.12003	1.42973
mlclust_1121	chr14	8895773	8897759	+	1986	chr3	58282245	58285068	+	2823	1986	2823	0.17405	120	0.053774	0.175872
mlclust_1122	chr14	9498903	9505834	+	6931	chr3	59035892	59054809	+	18917	1037	205	0.66989	90	0.034377	1.08216
mlclust_1123	chr14	11198139	11200285	-	2146	chr3	60464988	60472829	-	7841	2146	7841	0.57024	0	0	0.022235
mlclust_1124	chr14	11210210	11212462	-	2252	chr3	60477136	60478971	-	1835	2252	1835	0.10203	0	0.012807	0.073404
mlclust_1125	chr14	13073221	13074553	+	1332	chr3	62281973	62283283	+	1310	1332	1310	0.00833	0	0.044489	13.5621
mlclust_1126	chr14	13153892	13156987	+	3095	chr3	62335290	62338137	+	2847	3094	2846	0.04175	0	0.04626	0.005891
mlclust_1127	chr14	15895545	15897939	+	2394	chr3	27109896	27114696	-	4800	2394	4800	0.33445	0	0.133828	0.00564
mlclust_1128	chr14	16270136	16284959	+	14823	chr3	26651682	26665703	-	14021	1273	2421	0.31077	153	1.18706	0.055397
mlclust_1129	chr14	17912219	17914750	-	2531	chr3	24975847	24978410	+	2563	2528	2560	0.00629	0	0.013957	0
mlclust_1130	chr14	18659682	18662355	+	2673	chr3	24374696	24378579	-	3883	2672	3883	0.18474	111	0.019984	0.055502
mlclust_1131	chr14	19165584	19167464	+	1880	chr3	23844179	23846337	-	2158	1878	1410	0.14234	0	0.135201	0.095118
mlclust_1132	chr14	20691781	20693126	-	1345	chr14	52435340	52436512	+	1172	1345	1172	0.06873	0	0.085682	51.6852
mlclust_1133	chr14	21390141	21393543	+	3402	chr10	75284699	75286650	+	1951	1248	805	0.21578	222	1.11587	0.999629
mlclust_1134	chr14	21460230	21461072	+	842	chr10	75385786	75386538	+	752	842	752	0.05646	0	0.28095	1.58394
mlclust_1135	chr14	21491862	21493433	-	1571	chr10	75501810	75504033	-	2223	1569	573	0.46499	213	0.103075	6.98126
mlclust_1136	chr14	22617192	22617946	+	754	chr10	76941094	76941880	+	786	754	786	0.02078	0	0.04138	16.7859
mlclust_1137	chr14	22687851	22708988	-	21137	chr10	77025595	77040198	-	14603	1164	998	0.07678	0	0.567147	0.235175
mlclust_1138	chr14	22808966	22810356	+	1390	chr10	77163433	77164835	+	1402	1390	1402	0.0043	0	0.255734	0.10065
mlclust_1139	chr14	22811657	22815322	+	3665	chr10	77166079	77169847	+	3768	3665	3768	0.01386	0	0.108389	0.721763
mlclust_1140	chr14	24938907	24939478	+	571						571			0	0.050132
mlclust_1141	chr14	25265776	25267150	+	1374						1374			102	0.745459
mlclust_1142	chr14	25424656	25425811	-	1155	chr10	79923583	79924535	-	952	1155	952	0.09635	0	0	0.068538
mlclust_1143	chr14	25441380	25448422	+	7042	chr10	79941350	79947142	+	5792	756	278	0.46228	0	0.09431	0
mlclust_1144	chr14	25653120	25654570	+	1450	chr10	80127980	80128521	+	541	1450	541	0.45655	318	0	0
mlclust_1145	chr14	25886389	25893928	-	7539	chr10	80379044	80387193	-	8149	2626	2516	0.02139	147	0.013436	0
mlclust_1146	chr14	25959280	25962727	-	3447	chr10	80461273	80464294	-	3021	774	826	0.0325	0	0.557193	0
mlclust_1147	chr14	26261126	26272713	+	11587	chr10	80806796	80821219	+	14423	608	724	0.08709	135	2.43667	0.793067
mlclust_1148	chr14	26275222	26280614	-	5392	chr10	80825234	80830566	-	5332	3467	3339	0.01881	108	0.446623	0.17587
mlclust_1149	chr14	27488498	27492137	+	3639	chr3	57540244	57542649	-	2405	3639	2405	0.20417	135	0.314436	0.264518
mlclust_1150	chr14	27732173	27732632	-	459	chr3	57307110	57307484	+	374	458	373	0.10229	0	0.539257	11.8309
mlclust_1151	chr14	29609848	29610702	-	854	chr3	55239455	55240984	+	1529	817	372	0.37426	0	1.84667	0
mlclust_1152	chr14	30654042	30654917	+	875	chr3	54058259	54059443	-	1184	874	1183	0.15022	111	0.181806	0.033093
mlclust_1153	chr14	31943045	31944939	-	1894	chr3	52567114	52569311	+	2197	1892	2195	0.07414	0	1.00265	0.319021
mlclust_1154	chr14	33278227	33296734	+	18507	chr10	50802484	50818168	-	15684	1118	265	0.61678	0	0.031559	0
mlclust_1155	chr14	33326471	33326938	-	467	chr10	50746845	50747221	+	376	467	376	0.10795	0	0.380081	0
mlclust_1156	chr14	34999289	35000589	-	1300	chr10	47010844	47011150	+	306	1300	306	0.61893	0	0	0.109573
mlclust_1157	chr14	35485651	35486948	-	1297	chr10	88281694	88282875	+	1181	1297	1181	0.04681	0	0.10627	0.307941
mlclust_1158	chr14	35572587	35579200	+	6613	chr10	88169918	88175649	-	5731	4080	2295	0.28	90	0.017296	0.012362
mlclust_1159	chr14	35582160	35582996	-	836						836			186	0.04595
mlclust_1160	chr14	37688130	37690598	-	2468	chr10	86275968	86278267	+	2299	2467	2298	0.03547	0	0.043289	19.1599
mlclust_1161	chr14	38279007	38281084	-	2077	chr10	85596498	85597243	+	745	2077	745	0.47201	0	0	0
mlclust_1162	chr14	39395227	39398540	-	3313						3312	146	0.91556	0	0.00974
mlclust_1163	chr14	39664622	39666193	-	1571	chr10	84303237	84304360	+	1123	1571	1123	0.1663	0	0.237926	0.063158
mlclust_1164	chr14	40033358	40063718	+	30360	chr10	83869489	83900913	-	31424	1512	1020	0.19431	0	21.3897	1.06833
mlclust_1165	chr14	40106541	40110301	-	3760	chr10	83820202	83822527	+	2325	3760	2325	0.23583	0	0.008761	0.086527
mlclust_1166	chr14	40130703	40133120	-	2417	chr10	83794742	83797204	+	2462	2417	2462	0.00922	129	0	0.074903
mlclust_1167	chr14	40154160	40158487	-	4327	chr10	83768494	83770340	+	1846	4327	1846	0.40191	150	0	0.036326
mlclust_1168	chr14	40197169	40198713	-	1544	chr10	83719594	83721206	+	1612	1544	1612	0.02155	0	0.017854	0.135199
mlclust_1169	chr14	40202810	40205517	-	2707	chr10	83712074	83715791	+	3717	2705	3715	0.15732	0	0.844876	0.010877
mlclust_1170	chr14	41602457	41606491	-	4034	chr10	82421163	82424165	+	3002	4034	3002	0.14667	0	0.007734	0.011169
mlclust_1171	chr14	41616882	41618840	-	1958	chr10	82408277	82408818	+	541	1958	541	0.56703	0	0.105761	0
mlclust_1172	chr14	44769271	44790902	-	21631						568	250	0.38875	0	0.406219
mlclust_1173	chr14	45165867	45169160	-	3293						3293			114	0.105154
mlclust_1174	chr14	46163357	46182552	+	19195	chr14	53431363	53470861	+	39498	762	753	0.00594	105	6.01753	0.810052
mlclust_1175	chr14	47222480	47257098	-	34618	chr14	54684526	54721292	-	36766	1926	2018	0.02333	0	0.314661	0.193997
mlclust_1176	chr14	47497673	47500263	-	2590	chr14	55027651	55030038	-	2387	2588	2385	0.04082	90	0.148836	0.08435
mlclust_1177	chr14	47913286	47915773	+	2487	chr14	55513320	55516204	+	2884	2487	2884	0.07392	0	0.04843	5.24025
mlclust_1178	chr14	47941112	47942769	+	1657	chr14	55534098	55536260	+	2162	1655	505	0.53241	93	0.061367	35.261
mlclust_1179	chr14	48376715	48377173	-	458	chr14	56183174	56183819	-	645	342	505	0.19244	0	0	0.171562
mlclust_1180	chr14	48980247	48980948	-	701	chr14	56943344	56944089	-	745	701	745	0.03043	0	0	0
mlclust_1181	chr14	49180488	49182951	+	2463	chr14	57178610	57181006	+	2396	832	1501	0.28676	225	1.18607	0
mlclust_1182	chr14	49288962	49413023	+	124061	chr14	57279088	57414487	+	135399	2680	1788	0.19964	129	56.3207	0.328428
mlclust_1183	chr14	49291768	49293574	-	1806	chr14	57281784	57283624	-	1840	1806	1840	0.00933	0	0.033346	0
mlclust_1184	chr14	49347088	49360484	-	13396	chr14	57346707	57357705	-	10998	1432	341	0.61534	96	0.778017	0.267879
mlclust_1185	chr14	49434095	49435404	+	1309	chr14	57430702	57432009	+	1307	1309	1307	0.00076	0	0.024644	0.032525
mlclust_1186	chr14	49602163	49610865	-	8702	chr14	57645155	57656262	-	11107	741	409	0.2887	0	0.199615	0.163957
mlclust_1187	chr14	49623764	49628238	-	4474	chr14	57664309	57670080	-	5771	4472	5765	0.12631	165	0.119404	0.511681
mlclust_1188	chr14	51508264	51510242	-	1978	chr14	20894016	20896916	-	2900	1978	2900	0.18901	0	0.029959	1.80214
mlclust_1189	chr14	51762547	51763792	-	1245						1245			0	0
mlclust_1190	chr14	51937009	51965164	-	28155	chr20	31762902	31769254	-	6352	1140	633	0.28596	162	0.0619	0.288616
mlclust_1191	chr14	52874069	52877398	-	3329	chr14	21920061	21924234	-	4173	3328	4173	0.11265	0	1.19064	0.275344
mlclust_1192	chr14	52992827	52995201	+	2374	chr14	22038975	22045618	+	6643	2372	6641	0.47365	93	0.015029	0
mlclust_1193	chr14	54772887	54773891	+	1004	chr14	22942337	22943430	+	1093	1004	1093	0.04244	0	0.029512	0.561195
mlclust_1194	chr14	54969136	54971320	-	2184						2175			111	0.028357
mlclust_1195	chr14	55065154	55066698	+	1544						1544			0	0.020893
mlclust_1196	chr14	55701584	55703763	+	2179						2178			0	1.03392
mlclust_1197	chr14	56177936	56179244	-	1308	chr14	24579884	24583884	-	4000	1308	4000	0.50716	0	0.715606	0.061885
mlclust_1198	chr14	57285936	57286951	-	1015	chr13	20207278	20207658	-	380	1015	380	0.4552	0	0.31565	0.033759
mlclust_1199	chr14	58190450	58191205	+	755	chr13	21348129	21349610	+	1481	532	624	0.07958	0	0.169801	1.20366
mlclust_1200	chr14	58508658	58509673	+	1015	chr13	22032923	22033945	+	1022	1014	1021	0.00344	0	0.875141	0.772419
mlclust_1201	chr14	58618159	58622532	+	4373	chr13	22178366	22181516	+	3150	856	523	0.24148	132	0.064407	0.181163
mlclust_1202	chr14	60870463	60871114	+	651	chr13	25874968	25875505	-	537	651	537	0.09596	144	0.053191	0.145805
mlclust_1203	chr14	61004820	61007030	+	2210	chr13	25735819	25737410	-	1591	2210	1591	0.16285	0	0.024162	13.3611
mlclust_1204	chr14	61017973	61018296	+	323	chr13	25723425	25724096	-	671	323	671	0.3501	0	0	0.124923
mlclust_1205	chr14	61308835	61310872	-	2037	chr13	24795514	24798183	-	2669	2033	2665	0.13453	0	0.814621	0.371149
mlclust_1206	chr14	61911819	61924171	-	12352						798	510	0.22018	0	0.482692
mlclust_1207	chr14	62067324	62068974	+	1650	chr13	50386542	50386856	+	314	1650	314	0.68024	93	0.577355	0.043107
mlclust_1208	chr14	62111524	62119219	+	7695	chr13	50416987	50424935	+	7948	677	684	0.00514	117	0.056742	0
mlclust_1209	chr14	62211114	62212678	-	1564						1560			0	0
mlclust_1210	chr14	62237031	62301162	-	64131	chr13	50599649	50699677	-	100028	5568	3768	0.1928	108	0.870653	4.83009
mlclust_1211	chr14	64219980	64222877	-	2897	chr8	11061261	11063065	+	1804	2897	1804	0.2325	0	0.055296	0.04313
mlclust_1212	chr14	64283284	64285017	+	1733	chr8	10963467	10966767	-	3300	1730	2286	0.13845	129	0	2.99515
mlclust_1213	chr14	64370088	64474326	+	104238	chr8	10713714	10853956	-	140242	6053	5871	0.01526	105	0.312652	1.33352
mlclust_1214	chr14	64477572	64479385	-	1813						1813			102	0.179773
mlclust_1215	chr14	64718131	64723072	-	4941	chr8	10337022	10342019	+	4997	865	1060	0.1013	0	0.040789	1.58157
mlclust_1216	chr14	65149788	65156375	-	6587	chr8	9816782	9823671	+	6889	1836	1442	0.1202	102	0.032801	0
mlclust_1217	chr14	65193195	65195629	+	2434	chr8	9774565	9776754	-	2189	2434	2189	0.053	0	0.041727	0.022976
mlclust_1218	chr14	65206951	65212798	+	5847	chr8	9757573	9763484	-	5911	4044	4056	0.00148	0	0.058615	1.94678
mlclust_1219	chr14	65425774	65428452	+	2678	chr8	28924799	28927219	-	2420	2678	2420	0.05061	0	0.0527	7.24129
mlclust_1220	chr14	65792905	65804173	+	11268						520	75	0.7479	93	0.40711
mlclust_1221	chr14	65811285	65814526	-	3241	chr8	28428563	28431772	+	3209	3241	3209	0.00496	0	0.010886	4.23164
mlclust_1222	chr14	66084633	66086000	+	1367	chr8	28125501	28126846	-	1345	1200	1200	0	0	0	0.035463
mlclust_1223	chr14	66857867	66861360	-	3493	chr8	27221901	27226891	+	4990	3492	4989	0.17651	0	0.286912	0.05971
mlclust_1224	chr14	66883365	66885021	-	1656	chr8	27198499	27200652	+	2153	1650	2147	0.13089	0	0.194173	0.134102
mlclust_1225	chr14	66914170	66915813	-	1643	chr8	27168947	27169521	+	574	611	216	0.47763	0	0.113346	1.31944
mlclust_1226	chr14	66955551	66960066	-	4515	chr8	27120445	27126637	+	6192	2360	3046	0.1269	138	0.029901	0.280695
mlclust_1227	chr14	67355495	67358904	+	3409	chr8	26611344	26615331	-	3987	3409	3987	0.07815	0	0	10.5825
mlclust_1228	chr14	67489505	67490560	+	1055	chr8	26431764	26433377	-	1613	1055	1613	0.20915	0	0.160163	0.020787
mlclust_1229	chr14	68287034	68290387	-	3353	chr8	25370995	25375217	+	4222	3353	4222	0.11472	0	0	0.067999
mlclust_1230	chr14	68551740	68553942	+	2202	chr8	25038617	25041973	-	3356	2202	3356	0.20763	0	0.067173	0.069936
mlclust_1231	chr14	68741741	68749421	+	7680	chr8	24764841	24772440	-	7599	2987	3376	0.06113	0	2.82446	12.9161
mlclust_1232	chr14	70095112	70095640	+	528						528			0	0.224113
mlclust_1233	chr14	70688985	70701091	+	12106	chr8	22281978	22298973	-	16995	3941	2184	0.28686	0	0.425149	0.382167
mlclust_1234	chr14	71252739	71273761	+	21022	chr8	21665446	21678364	-	12918	1356	852	0.22826	0	0.063809	0.111207
mlclust_1235	chr14	72244229	72245502	-	1273						1273			0	0
mlclust_1236	chr14	72256515	72320245	+	63730	chr8	20669826	20724165	-	54339	1548	649	0.40919	0	3.07699	0.877967
mlclust_1237	chr14	73132554	73138120	-	5566	chr13	49525113	49530387	+	5274	1205	2223	0.29697	0	0.044313	0
mlclust_1238	chr14	73727926	73729125	+	1199						1197	84	0.86885	0	0.042424
mlclust_1239	chr14	73746324	73749119	-	2795	chr13	48851876	48854219	+	2343	2795	2343	0.08797	0	0.076419	0.023942
mlclust_1240	chr14	74755333	74769548	+	14215	chr13	47715177	47733888	-	18711	1659	1367	0.0965	0	0.042535	0.066823
mlclust_1241	chr14	75297155	75299384	-	2229	chr13	47179850	47181768	+	1918	2229	1918	0.07499	0	0.028945	0.043871
mlclust_1242	chr14	75321921	75326411	+	4490	chr13	47144177	47152859	-	8682	388	240	0.23567	0	10.3096	3.25081
mlclust_1243	chr14	76345169	76347972	-	2803	chr13	45782493	45786086	+	3593	2803	3593	0.12351	0	0.05435	0.021449
mlclust_1244	chr14	76651268	76652132	+	864	chr13	45384352	45384507	-	155	452	155	0.48929	174	0	0
mlclust_1245	chr14	76914364	76920662	-	6298	chr13	44986148	44993923	+	7775	1658	1192	0.16351	90	1.48922	0.210964
mlclust_1246	chr14	77077374	77086909	+	9535	chr13	44818438	44829035	-	10597	2794	3103	0.0524	147	0.012759	0.021704
mlclust_1247	chr14	78220496	78222129	-	1633	chr13	43687041	43688340	+	1299	1633	1299	0.11392	0	0.018144	3.14901
mlclust_1248	chr14	78223544	78224771	-	1227	chr13	43684218	43685577	+	1359	1221	1359	0.05349	159	0.023444	1.7147
mlclust_1249	chr14	78959156	78962636	-	3480	chr13	42812383	42817034	+	4651	3479	4650	0.14405	0	0	4.12032
mlclust_1250	chr14	79124644	79127528	+	2884	chr13	42620377	42623277	-	2900	2884	2900	0.00277	0	0.269148	0.24754
mlclust_1251	chr14	80102726	80112711	+	9985	chr13	53352360	53358113	+	5753	1054	1095	0.01908	123	0.160315	0.107257
mlclust_1252	chr14	80298273	80307037	+	8764	chr13	53523941	53537660	+	13719	3446	3562	0.01655	126	0.007685	0.01412
mlclust_1253	chr14	84933376	84934510	+	1134	chr13	58299448	58300545	+	1097	1134	1097	0.01658	0	0.023354	28.2974
mlclust_1254	chr14	85644873	85645818	-	945	chr13	58973543	58974441	-	898	940	893	0.02564	0	0	0
mlclust_1255	chr14	86645809	86683495	+	37686	chr13	59837520	59865156	+	27636	1144	931	0.10265	0	0.16493	0.070084
mlclust_1256	chr14	90526697	90669567	+	142870	chr13	64052270	64187298	+	135028	1479	1972	0.14286	0	0.685972	0.628655
mlclust_1257	chr14	93931176	93935906	-	4730	chr13	67447442	67451441	-	3999	4730	3999	0.08374	0	0.02439	0.737828
mlclust_1258	chr14	94018064	94022248	-	4184	chr13	67537925	67540785	-	2860	4184	2860	0.18796	0	0.014163	0.082065
mlclust_1259	chr14	94030391	94033956	-	3565	chr13	67548848	67551144	-	2296	3564	2226	0.23109	0	0.047411	0.075313
mlclust_1260	chr14	94084357	94086024	-	1667	chr13	67598009	67598341	-	332	1662	332	0.667	0	0.020835	0.252479
mlclust_1261	chr14	94110596	94112125	-	1529	chr13	67620732	67622046	-	1314	1529	1314	0.07562	0	0.019693	0.041003
mlclust_1262	chr14	96282162	96283652	-	1490						1490			0	0.019886
mlclust_1263	chr14	99921763	99976121	+	54358	chr13	73878686	73940162	+	61476	965	830	0.07521	0	4.71657	0.12119
mlclust_1264	chr14	100265401	100266079	-	678	chr13	74260232	74260914	-	682	678	682	0.00294	0	0	9.69142
mlclust_1265	chr14	100877074	100878744	+	1670	chr13	74875972	74877661	+	1689	1669	1688	0.00566	0	0.141738	0.066743
mlclust_1266	chr14	102039272	102039897	-	625	chr13	76111477	76112234	-	757	536	669	0.11037	0	0	3.25613
mlclust_1267	chr14	102126817	102129032	-	2215	chr13	76206814	76210350	-	3536	2212	3180	0.17953	0	0.296207	0.123437
mlclust_1268	chr14	103378652	103379726	-	1074	chr13	77457248	77458249	-	1001	1074	1001	0.03518	0	0.047283	62.1527
mlclust_1269	chr14	103386628	103433020	-	46392	chr13	77465713	77518900	-	53187	1061	1281	0.09394	0	22.0621	0.152805
mlclust_1270	chr14	103745805	103759695	+	13890	chr13	77900984	77926937	+	25953	789	900	0.06572	261	0.570535	0.275491
mlclust_1271	chr14	104298700	104299857	+	1157	chr13	78543749	78552762	+	9013	1157	9013	0.77247	0	0	0.011583
mlclust_1272	chr14	104687649	104858553	-	170904	chr13	78965590	79169069	-	203479	5727	4791	0.08899	0	0.242766	1.07775
mlclust_1273	chr14	105012007	105316656	+	304649	chr13	79326653	79679472	+	352819	7709	4147	0.30044	0	1413.77	2.06112
mlclust_1274	chr14	105505975	105512713	-	6738	chr13	79885971	79892983	-	7012	3072	3182	0.01759	0	0.082652	7.12387
mlclust_1275	chr14	105826775	105836933	+	10158	chr13	80298529	80319670	+	21141	894	425	0.35557	0	0.795235	0.253545
mlclust_1276	chr14	105912417	105914011	-	1594	chr13	80422295	80424176	-	1881	1594	1881	0.08259	231	0.021201	0.006938
mlclust_1277	chr14	105989273	105993121	+	3848	chr13	80512196	80514776	+	2580	3387	2444	0.16172	129	0.010525	0.021358
mlclust_1278	chr14	106640900	106667151	-	26251	chr13	81291755	81328328	-	36573	2306	1032	0.38167	0	0.133267	0.341413
mlclust_1279	chr14	109185026	109186605	-	1579	chr13	84312899	84314654	-	1755	1578	1754	0.05282	0	0.18461	0.009558
mlclust_1280	chr14	109278807	109283231	-	4424	chr13	84414952	84423304	-	8352	4424	8352	0.30745	0	0.007975	0.174631
mlclust_1281	chr14	115231186	115260549	+	29363	chr13	91759336	91790521	+	31185	1895	1173	0.23533	237	0.221303	3.1808
mlclust_1282	chr14	115339448	115345170	-	5722	chr13	91861502	91863965	-	2463	1074	646	0.24884	0	0.354654	0
mlclust_1283	chr14	115443718	115445948	+	2230	chr13	92003635	92006845	+	3210	2230	3210	0.18015	0	0.013287	0.464006
mlclust_1284	chr14	118490591	118490997	+	406						406			0	0.521421
mlclust_1285	chr14	118635453	118637981	+	2528	chr13	95364924	95367655	+	2731	2322	2487	0.03431	0	0.092866	0.478604
mlclust_1286	chr14	119104874	119106823	+	1949	chr13	95953038	95955406	+	2368	1949	2368	0.09706	144	0.367741	0.250885
mlclust_1287	chr14	120870597	120872318	-	1721	chr13	98080733	98081150	-	417	1721	417	0.60992	0	0.019636	0.344233
mlclust_1288	chr14	121036256	121037440	+	1184	chr13	98300895	98301954	-	1059	1183	1058	0.05578	0	0	0
mlclust_1289	chr14	122145640	122146513	-	873	chr13	99678384	99679717	-	1333	873	1333	0.20852	0	0	0.057742
mlclust_1290	chr14	122197178	122200251	+	3073	chr13	99739008	99743065	+	4057	3073	4057	0.13801	0	0.025854	0.463184
mlclust_1291	chr14	122497160	122506196	-	9036	chr13	100137171	100153533	-	16362	2711	1870	0.18358	0	0.081347	1.48639
mlclust_1292	chr14	122849602	122851636	+	2034	chr13	100608634	100610773	+	2139	2034	2139	0.02516	0	0.058269	0
mlclust_1293	chr14	122869505	122874421	-	4916	chr13	100628938	100633834	-	4896	2352	2361	0.00191	0	2.93527	0.060798
mlclust_1294	chr14	122870374	122872044	+	1670	chr13	100629795	100631345	+	1550	1668	1548	0.03731	177	2.39371	0.02166
mlclust_1295	chr14	124374245	124376952	-	2707	chr13	102369798	102372473	-	2675	2707	2675	0.00595	0	1.00541	3.32317
mlclust_1296	chr15	4529548	4531292	+	1744	chr5	41307056	41308875	-	1819	1744	1819	0.02105	0	0.020231	18.8746
mlclust_1297	chr15	4997354	5013748	-	16394	chr5	40909598	40936094	+	26496	2576	1940	0.14083	0	0.041458	59.6252
mlclust_1298	chr15	5973511	5976152	-	2641	chr5	39815393	39816175	+	782	2641	782	0.54309	0	0	0
mlclust_1299	chr15	7077224	7079467	-	2243	chr5	38556846	38559516	+	2670	2243	2670	0.08691	0	0.1132	2.82369
mlclust_1300	chr15	7439887	7440818	+	931	chr5	38156945	38157773	-	828	931	828	0.05856	168	0.454773	0
mlclust_1301	chr15	8449289	8450370	+	1081						1081			0	0.049396
mlclust_1302	chr15	8478950	8482788	+	3838						1690	242	0.74948	0	0.519912
mlclust_1303	chr15	9129575	9132238	+	2663	chr5	36098652	36101247	-	2595	2633	2564	0.01328	117	0.0237	9.97769
mlclust_1304	chr15	10367307	10370076	-	2769						2769			0	0.308986
mlclust_1305	chr15	10644590	10719878	+	75288	chr5	34583108	34656280	-	73172	2682	1141	0.40309	0	0.943734	0.273512
mlclust_1306	chr15	10758805	10762468	+	3663	chr5	34558184	34559459	-	1275	870	552	0.22363	240	0.19422	0
mlclust_1307	chr15	10965680	10968710	+	3030	chr5	33934674	33938195	-	3521	3030	3521	0.07495	306	0.213499	0.007296
mlclust_1308	chr15	11266182	11278986	+	12804	chr5	33523639	33534964	-	11325	3756	3855	0.01301	93	0.023629	2.97214
mlclust_1309	chr15	11894097	11899838	+	5741	chr3	33075723	33076456	+	733	1023	192	0.68395	120	3.14792	5.35034
mlclust_1310	chr15	12286808	12289792	+	2984	chr5	32110679	32117093	-	6414	2983	1467	0.34067	0	3.6785	8.72795
mlclust_1311	chr15	13047530	13050253	-	2723	chr5	31245814	31248867	+	3053	2723	3053	0.05713	0	0.098049	0.017734
mlclust_1312	chr15	13052300	13055031	-	2731	chr5	31240730	31243032	+	2302	2731	2302	0.08524	126	0.117314	0.03046
mlclust_1313	chr15	13095728	13097338	-	1610	chr5	31199596	31200650	+	1054	1609	1054	0.20841	0	0	0.076677
mlclust_1314	chr15	16720348	16723140	+	2792						2791			0	0.010599
mlclust_1315	chr15	18007891	18299382	-	291491	chr5	25058806	25350398	+	291592	2506	892	0.47499	201	5.35294	7.02218
mlclust_1316	chr15	18627438	18748529	-	121091	chr5	24644984	24765604	+	120620	1162	284	0.60719	93	0.436243	0.459491
mlclust_1317	chr15	22888117	22890151	+	2034						2034			0	0.017024
mlclust_1318	chr15	24303364	24305382	-	2018	chr5	18498197	18498999	+	802	482	301	0.23116	0	0	0
mlclust_1319	chr15	24924354	24927955	-	3601	chr5	17829712	17830146	+	434	3600	288	0.85185	0	0	0
mlclust_1320	chr15	24949027	24950479	-	1452	chr5	17807827	17809218	+	1391	1452	1391	0.02146	102	0	0
mlclust_1321	chr15	25307547	25309534	-	1987	chr5	17257284	17259718	+	2434	1987	2434	0.10111	0	0.017941	0.069936
mlclust_1322	chr15	25388243	25390738	+	2495						2495			144	0.038789
mlclust_1323	chr15	27906650	27908925	-	2275	chr5	14203598	14205634	+	2036	2275	2036	0.05544	126	0.015221	0.062705
mlclust_1324	chr15	28784758	28787527	+	2769	chr5	13246831	13250165	-	3334	2769	3334	0.09258	0	0	0.01957
mlclust_1325	chr15	29754294	29759067	+	4773	chr5	12182211	12187335	-	5124	4773	5124	0.03547	0	0	0
mlclust_1326	chr15	31979705	31981108	+	1403	chr5	9760690	9762257	-	1567	1401	1565	0.05529	0	0	0
mlclust_1327	chr15	32170323	32174417	-	4094	chr5	9546382	9550406	+	4024	1482	1565	0.02724	108	0.125089	2.68102
mlclust_1328	chr15	32687170	32702907	-	15737	chr5	8912825	8916011	+	3186	436	1239	0.4794	0	0.242772	0
mlclust_1329	chr15	33527344	33529337	+	1993	chr8	98168993	98170289	+	1296	1993	1296	0.21192	0	0.069497	0.198437
mlclust_1330	chr15	33859327	33860172	+	845						845			141	0
mlclust_1331	chr15	34372734	34374567	+	1833	chr8	99057529	99059701	+	2172	1833	2172	0.08464	129	9.44076	0.93367
mlclust_1332	chr15	36094646	36095202	+	556	chr8	101157742	101158181	+	439	556	439	0.11759	0	0	0.085545
mlclust_1333	chr15	37161554	37162896	-	1342	chr8	102503365	102504752	-	1387	1341	1386	0.0165	132	0.12028	1.48441
mlclust_1334	chr15	37890225	37894732	+	4507	chr8	103250627	103262712	+	12085	4507	12085	0.45673	0	0.236671	0.298144
mlclust_1335	chr15	38314735	38316053	+	1318	chr8	103751111	103751431	+	320	622	320	0.32059	123	0.622364	0
mlclust_1336	chr15	38448540	38449819	+	1279	chr8	103875865	103877217	+	1352	1275	1348	0.02783	102	7.88799	2.18231
mlclust_1337	chr15	39844348	39846324	-	1976	chr8	105675983	105678291	-	2308	1976	2308	0.0775	0	0.015239	0
mlclust_1338	chr15	39994152	39999619	+	5467	chr8	105795392	105801417	+	6025	1061	855	0.10752	0	0.139411	0.039215
mlclust_1339	chr15	40170186	40171295	+	1109	chr8	105939937	105940391	+	454	1109	454	0.41907	0	0	0
mlclust_1340	chr15	40342867	40358823	-	15956	chr8	106136328	106149551	-	13223	1459	1172	0.10908	0	0	0
mlclust_1341	chr15	40456198	40458086	-	1888	chr8	106289281	106292228	-	2947	1888	2947	0.21903	96	0.028283	0.009186
mlclust_1342	chr15	41425761	41429612	+	3851	chr8	107435717	107442765	+	7048	3851	7048	0.29333	0	0.026373	0.011939
mlclust_1343	chr15	41886761	41887686	-	925	chr8	107933482	107934464	-	982	925	982	0.02989	0	0	0
mlclust_1344	chr15	42507786	42536162	+	28376	chr8	108509565	108544524	+	34959	4069	5020	0.10463	0	0.509798	0.64812
mlclust_1345	chr15	43363046	43364757	+	1711	chr8	109507889	109509617	+	1728	1706	1726	0.00583	0	0	0.155408
mlclust_1346	chr15	43531085	43532581	-	1496	chr8	109671334	109671697	-	363	1496	363	0.60947	0	0.019775	0
mlclust_1347	chr15	43565077	43566282	-	1205	chr8	109695110	109698311	-	3201	1205	3201	0.45302	0	0.02928	0
mlclust_1348	chr15	46267411	46327725	-	60314						1298	116	0.83593	0	1.39986
mlclust_1349	chr15	47942234	47944389	-	2155	chr8	113781130	113782223	-	1093	2155	1093	0.32697	0	0	0.046015
mlclust_1350	chr15	48556652	48559153	-	2501	chr8	114391368	114393690	-	2322	2500	2322	0.03691	0	0.094624	0.057759
mlclust_1351	chr15	50486300	50488973	-	2673	chr8	116420225	116422998	-	2773	2673	2773	0.01836	0	0.022135	5.63387
mlclust_1352	chr15	51063185	51227156	-	163971	chr8	117050419	117242028	-	191609	1874	1964	0.02345	0	0.243881	0.27848
mlclust_1353	chr15	55520165	55521780	-	1615	chr8	121592735	121593416	-	681	1615	681	0.40679	234	0	0.019162
mlclust_1354	chr15	55561277	55565581	-	4304	chr8	121630417	121635566	-	5149	4304	5149	0.08939	93	0.011799	0.049946
mlclust_1355	chr15	57544091	57546199	+	2108	chr8	123815040	123818830	+	3790	2098	3780	0.28615	0	0	0.172626
mlclust_1356	chr15	58064615	58065916	+	1301	chr8	124571421	124573445	+	2024	1300	2023	0.21757	0	0	0.012901
mlclust_1357	chr15	58237378	58242881	+	5503	chr8	124771541	124776182	+	4641	1390	868	0.23118	189	0.042633	0.030068
mlclust_1358	chr15	58607175	58609420	-	2245						2245			0	0.023785
mlclust_1359	chr15	58772798	58773616	-	818	chr8	125563035	125563868	-	833	818	833	0.00909	0	0.941781	16.0496
mlclust_1360	chr15	60654507	60657164	+	2657	chr8	127568691	127571427	+	2736	2657	2736	0.01465	0	2.3554	0.74831
mlclust_1361	chr15	60744528	60803905	+	59377						1679	836	0.33519	282	0.339719
mlclust_1362	chr15	61328192	61330668	-	2476	chr8	128266358	128268733	-	2375	2476	2375	0.02082	99	0.013985	0
mlclust_1363	chr15	61368355	61375738	-	7383	chr8	128310276	128318252	-	7976	1189	1849	0.21725	0	0.801208	0.091965
mlclust_1364	chr15	62042973	62044802	+	1829	chr8	129042662	129050312	+	7650	1827	7648	0.61435	123	0.017657	0.100158
mlclust_1365	chr15	63245954	63311163	-	65209	chr8	130350393	130419675	-	69282	4592	2916	0.22323	0	0.161907	0.102158
mlclust_1366	chr15	63567291	63568846	+	1555	chr8	130705012	130705973	+	961	1125	961	0.07862	0	0	0
mlclust_1367	chr15	65817969	65821839	-	3870	chr8	133133128	133137143	-	4015	3867	4014	0.01865	0	0.034852	8.95032
mlclust_1368	chr15	66118478	66121805	+	3327	chr8	133493448	133495770	+	2322	1151	601	0.31393	0	0.088082	0
mlclust_1369	chr15	66934436	66935865	-	1429	chr8	134467090	134468902	-	1812	1427	595	0.41147	0	0.040423	118.02
mlclust_1370	chr15	67006161	67007713	-	1552	chr8	134581875	134583523	-	1648	1552	1648	0.03	0	0.092917	0.254611
mlclust_1371	chr15	67008567	67012584	+	4017	chr8	134584418	134587859	+	3441	4015	3439	0.07727	0	0	0.54315
mlclust_1372	chr15	67058330	67208656	+	150326	chr8	134662430	134812815	+	150385	1038	1000	0.01865	0	0.720197	0.269234
mlclust_1373	chr15	69064360	69065429	-	1069						1069			258	0
mlclust_1374	chr15	69100962	69105148	+	4186	chr8	136844000	136849605	+	5605	1101	3357	0.50606	0	0.092246	0.008442
mlclust_1375	chr15	72332302	72333093	-	791	chr8	140617874	140618645	-	771	789	769	0.01284	0	0.114492	0.370609
mlclust_1376	chr15	72920095	72921088	-	993	chr8	141521502	141521807	-	305	993	305	0.53005	126	0.714996	1.39546
mlclust_1377	chr15	72926284	72926960	-	676	chr8	141530257	141530976	-	719	676	719	0.03082	0	0.76797	8.00319
mlclust_1378	chr15	73476281	73478032	+	1751	chr8	142318656	142319989	+	1333	1751	1333	0.13554	189	0.016348	0.161675
mlclust_1379	chr15	74614494	74631070	+	16576						1625	208	0.77305	153	0.703196
mlclust_1380	chr15	74819179	74819760	+	581	chr12	93964796	93964925	-	129	581	129	0.63662	99	0.425094	0.314778
mlclust_1381	chr15	75770707	75771355	-	648	chr8	144717944	144718043	-	99	648	99	0.73494	114	0.160311	0.659069
mlclust_1382	chr15	75867075	75868326	+	1251						1251			90	0.162371
mlclust_1383	chr15	76844453	76845274	+	821	chr22	36001350	36002119	+	769	821	769	0.0327	0	0.240734	1.31915
mlclust_1384	chr15	77173567	77175656	+	2089	chr22	36503692	36508231	+	4539	2089	4539	0.36964	198	0.03378	0.031252
mlclust_1385	chr15	77199923	77201440	-	1517	chr2	85132779	85133795	+	1016	669	744	0.05308	120	0.180038	399.62
mlclust_1386	chr15	77950135	77974572	+	24437	chr22	37099457	37130552	+	31095	4396	9058	0.34651	0	0.310049	0.042238
mlclust_1387	chr15	78269175	78269731	+	556	chr22	37458828	37459440	+	612	556	612	0.04795	0	0.617274	7.24975
mlclust_1388	chr15	78755384	78757127	-	1743	chr22	38069640	38071615	-	1975	1743	1975	0.0624	0	0.033945	0.093372
mlclust_1389	chr15	78856885	78859042	-	2157	chr22	38199118	38201440	-	2322	2157	2322	0.03684	0	0.739871	1.69047
mlclust_1390	chr15	78905148	78905478	-	330	chr22	38244754	38244935	-	181	330	181	0.29159	0	1.23107	5.6834
mlclust_1391	chr15	79058632	79059795	-	1163	chr22	38452420	38453388	-	968	1156	918	0.11475	141	0.233168	0.219145
mlclust_1392	chr15	79720125	79722812	-	2687	chr22	39406820	39410201	-	3381	2687	3381	0.11437	0	0.134476	0.008391
mlclust_1393	chr15	79878685	79880524	+	1839	chr22	39670379	39672588	+	2209	1835	2209	0.09248	0	0.261895	0.022768
mlclust_1394	chr15	80767541	80771510	+	3969	chr22	40727156	40731806	+	4650	3967	4648	0.07905	0	0.043644	4.49459
mlclust_1395	chr15	81073089	81082292	-	9203	chr22	41082541	41101141	-	18600	1190	2314	0.32078	150	0.269231	0.039029
mlclust_1396	chr15	81482057	81482499	+	442	chr22	41575595	41576078	+	483	442	483	0.04432	0	0.08691	15.68
mlclust_1397	chr15	82124621	82125002	+	381	chr22	42393838	42394223	+	385	381	385	0.00522	0	0.311075	86.3922
mlclust_1398	chr15	82184917	82188766	+	3849	chr22	42513375	42516355	+	2980	3849	2980	0.12725	0	0.018524	0.061307
mlclust_1399	chr15	82189039	82190758	+	1719						1719			0	0.020525
mlclust_1400	chr15	83002779	83005229	+	2450	chr22	43045522	43048960	+	3438	2450	3438	0.1678	0	0.318372	0.04487
mlclust_1401	chr15	83003625	83006875	-	3250	chr22	43048952	43050596	-	1644	1684	200	0.78769	0	0.661527	0.20117
mlclust_1402	chr15	83091086	83093818	-	2732						2731			186	0.116169
mlclust_1403	chr15	84409953	84411871	-	1918						1917			0	0.139274
mlclust_1404	chr15	84545058	84550696	-	5638	chr22	45141766	45148884	-	7118	1237	805	0.21156	153	0.288191	0.334809
mlclust_1405	chr15	84977628	84978581	-	953	chr22	45832014	45834531	-	2517	953	2517	0.45072	0	0.070922	0.053284
mlclust_1406	chr15	84979683	84986562	-	6879	chr22	45835779	45840434	-	4655	1165	120	0.81323	126	0.098921	1.17739
mlclust_1407	chr15	85486095	85489433	+	3338	chr22	46451874	46455355	+	3481	3338	3481	0.02097	0	0.063987	0.801366
mlclust_1408	chr15	86720348	86721166	-	818						818			0	0.195834
mlclust_1409	chr15	89011356	89011966	+	610	chr22	50746407	50746995	+	588	610	588	0.01836	162	0.242483	0.09163
mlclust_1410	chr15	89146197	89147016	+	819						816			0	0.124464
mlclust_1411	chr15	89306666	89315278	+	8612	chr22	51066644	51097761	+	31117	1886	13920	0.76136	0	0.529381	0.075874
mlclust_1412	chr15	89607414	89609599	-	2185	chr12	33523866	33526163	-	2297	2185	2297	0.02499	0	0	0.516031
mlclust_1413	chr15	90176348	90177265	-	917	chr12	38879599	38880580	-	981	917	981	0.03372	0	0.02888	0
mlclust_1414	chr15	91428013	91435105	+	7092	chr12	40536188	40537492	+	1304	1011			0	1.97581
mlclust_1415	chr15	92269857	92273757	+	3900	chr12	41663514	41666755	+	3241	3741	3193	0.07903	0	0.016098	0.027134
mlclust_1416	chr15	92307754	92310640	+	2886	chr12	41705502	41710513	+	5011	2886	5011	0.26909	102	0	0.010417
mlclust_1417	chr15	92601467	92602250	+	783	chr12	41967720	41968533	+	813	783	813	0.0188	0	0.04316	8.76894
mlclust_1418	chr15	93105884	93108416	+	2532	chr12	42538768	42540876	+	2108	2531	2108	0.09118	0	0.304376	0.127246
mlclust_1419	chr15	93399892	93402595	-	2703	chr12	42952708	42956255	-	3547	2703	3547	0.13504	0	0.012811	0.027676
mlclust_1420	chr15	93420810	93425326	-	4516	chr12	42977783	42982262	-	4479	4510	4475	0.0039	0	0.035519	0.033717
mlclust_1421	chr15	93564843	93568921	+	4078	chr12	43173506	43178958	+	5452	2538	2421	0.02359	0	0.042078	0.010598
mlclust_1422	chr15	93735286	93757542	-	22256	chr12	43373302	43398007	-	24705	1130	1187	0.0246	0	0.418691	0.083654
mlclust_1423	chr15	95882033	95885256	-	3223	chr12	45908139	45910912	-	2773	1506	1180	0.12137	0	0.819986	0.091319
mlclust_1424	chr15	96008223	96011999	-	3776	chr12	46020810	46025244	-	4434	3769	4216	0.05598	135	0.014628	0.019882
mlclust_1425	chr15	96020904	96028405	-	7501						3631			0	0.132686
mlclust_1426	chr15	96133695	96134900	+	1205						1205			0	0
mlclust_1427	chr15	96242130	96243031	-	901	chr12	46312532	46313420	-	888	901	888	0.00727	0	0.042635	8.99385
mlclust_1428	chr15	96291618	96294044	+	2426	chr12	46384716	46387733	+	3017	2426	3017	0.10858	0	0.157007	0.179456
mlclust_1429	chr15	96530603	96531064	+	461	chr12	46767105	46767549	+	444	461	444	0.01878	0	0	0.499645
mlclust_1430	chr15	98039370	98051385	-	12015	chr12	48597886	48599336	-	1450	948	1128	0.08671	0	0.334964	0.083997
mlclust_1431	chr15	98228868	98246699	+	17831	chr12	48876290	48890911	+	14621	1009	968	0.02074	222	0.069936	5.12276
mlclust_1432	chr15	98369121	98373057	-	3936	chr12	49082237	49086242	-	4005	3936	4005	0.00869	162	0.027133	7.89878
mlclust_1433	chr15	98703074	98704512	+	1438	chr12	49455012	49456327	+	1315	1428	1311	0.04272	0	0	0.206491
mlclust_1434	chr15	98772980	98774096	+	1116						1115			0	0.025673
mlclust_1435	chr15	99733393	99734707	+	1314	chr12	50706230	50708285	+	2055	1314	2055	0.21995	0	0.022916	0.041417
mlclust_1436	chr15	99843463	99844669	-	1206	chr12	50870497	50871630	-	1133	1206	1133	0.03121	0	4.48896	9.97445
mlclust_1437	chr15	99843998	99846364	+	2366	chr12	50870942	50873393	+	2451	2366	2451	0.01765	0	0.167069	11.5351
mlclust_1438	chr15	99920321	99922188	-	1867	chr12	50975373	50976792	-	1419	1867	1419	0.13634	0	0.811601	0.069977
mlclust_1439	chr15	100091083	100091538	+	455	chr12	51214310	51214757	+	447	455	447	0.00887	0	0.126776	8.82905
mlclust_1440	chr15	100290170	100299122	-	8952						2311	386	0.71376	144	0.413662
mlclust_1441	chr15	100430634	100433197	+	2563	chr12	51611941	51612994	+	1053	2563	1053	0.41759	0	0.269784	0.146192
mlclust_1442	chr15	100443605	100444274	-	669	chr12	51629642	51630842	-	1200	668	1199	0.28441	138	0	0.081875
mlclust_1443	chr15	100444570	100445541	-	971						878			0	0.07698
mlclust_1444	chr15	100693466	100695147	+	1681	chr12	51973049	51978168	+	5119	1681	5119	0.50559	0	0.128277	0.020073
mlclust_1445	chr15	101042458	101044109	+	1651	chr12	52389105	52390859	+	1754	1651	1754	0.03025	0	0.302474	16.4492
mlclust_1446	chr15	101123660	101126749	+	3089	chr12	52473510	52477145	+	3635	841	959	0.06556	267	0.038358	1.22428
mlclust_1447	chr15	102125867	102126582	-	715	chr12	53661309	53661939	-	630	715	630	0.0632	0	0.168455	0.062141
mlclust_1448	chr15	102266058	102266813	+	755	chr12	53809408	53810221	+	813	755	813	0.03699	0	0.05088	19.7087
mlclust_1449	chr15	102774492	102778161	-	3669	chr12	54356092	54359983	-	3891	2006	2052	0.01134	0	0.026619	0.820367
mlclust_1450	chr15	102966311	102971100	+	4789	chr12	54555129	54559717	+	4588	841	834	0.00418	111	0.209767	0.279877
mlclust_1451	chr15	103021979	103026255	-	4276	chr12	54624728	54630163	-	5435	4275	4994	0.07757	0	0.057708	20.1107
mlclust_1452	chr16	3872469	3877047	+	4578	chr16	3493587	3500163	+	6576	2698	1318	0.34363	0	0.362411	0.801344
mlclust_1453	chr16	4003933	4004233	+	300	chr16	3661717	3661842	+	125	300	125	0.41176	0	0.089847	1.02626
mlclust_1454	chr16	4082715	4083990	-	1275	chr16	3776569	3777702	-	1133	1274	1132	0.05902	0	0.259988	18.5253
mlclust_1455	chr16	4284888	4286151	-	1263	chr16	4012657	4013913	-	1256	1263	1256	0.00278	0	0	14.1699
mlclust_1456	chr16	4592921	4594230	-	1309	chr16	4363855	4365538	-	1683	1308	1682	0.12508	0	0.060741	0.016094
mlclust_1457	chr16	4871449	4874336	-	2887	chr16	4654257	4657159	-	2902	2887	2902	0.00259	0	0.415523	0.221241
mlclust_1458	chr16	5813503	5816794	+	3291	chr16	5976140	5977386	+	1246	3291	1246	0.45074	0	0.032451	0.026909
mlclust_1459	chr16	5961101	5962817	+	1716	chr16	6154725	6158716	+	3991	1716	3991	0.39863	0	0.020561	0.029404
mlclust_1460	chr16	5975679	5998589	+	22910	chr16	6175348	6199965	+	24617	675	718	0.03087	0	0.200263	1.35424
mlclust_1461	chr16	6287916	6290160	+	2244	chr16	6471094	6471769	+	675	2242	675	0.5372	0	0	0.024836
mlclust_1462	chr16	6576125	6578413	+	2288	chr16	6803732	6806212	+	2480	2284	2480	0.04114	0	0.014796	0
mlclust_1463	chr16	8459738	8460548	-	810						810			165	0.047425
mlclust_1464	chr16	8688818	8689824	-	1006	chr16	8985956	8986767	-	811	1006	811	0.10732	0	0.029407	3.58569
mlclust_1465	chr16	8856533	8859009	+	2476	chr16	9211168	9213545	+	2377	2475	2376	0.02041	0	0.035858	15.9585
mlclust_1467	chr16	10324197	10331378	-	7181	chr16	10682733	10688569	-	5836	4490	2042	0.37477	0	0.03393	0.025129
mlclust_1468	chr16	10895191	10896683	+	1492	chr16	11534751	11536729	+	1978	1492	1978	0.14006	0	0.021621	0.027372
mlclust_1469	chr16	11060184	11066215	-	6031	chr16	11758551	11762135	-	3584	2639	148	0.89379	108	0.026243	1.09747
mlclust_1470	chr16	11073786	11075062	+	1276	chr16	11771341	11772992	+	1651	1276	1651	0.12812	153	0.507519	33.187
mlclust_1471	chr16	11176267	11178361	+	2094	chr16	11890928	11891611	+	683	2094	683	0.5081	0	0.355427	0.955312
mlclust_1472	chr16	12629176	12946028	-	316852	chr16	13585022	13919341	-	334319	2188	858	0.43664	0	0.741374	2.24701
mlclust_1473	chr16	13252765	13255090	-	2325	chr16	14159965	14164065	-	4100	2325	4100	0.27626	93	0	0
mlclust_1474	chr16	13777254	13779064	-	1810	chr16	15189077	15191702	+	2625	1810	2625	0.18377	0	0.035646	0.02829
mlclust_1475	chr16	14109261	14110190	-	929	chr16	15688243	15689106	-	863	929	863	0.03683	0	4.58986	25.361
mlclust_1476	chr16	16312337	16313837	-	1500	chr12	32896629	32898474	+	1845	1500	1845	0.10314	0	1.16544	19.0817
mlclust_1477	chr16	17047612	17049204	+	1592	chr22	22113843	22114523	-	680	1043	189	0.69318	0	0.03683	9.31368
mlclust_1478	chr16	17922135	17923301	+	1166	chr22	19159180	19160427	+	1247	1166	1247	0.03357	141	0.060519	0.488449
mlclust_1479	chr16	18220847	18222419	-	1572	chr22	20133874	20135530	+	1656	1572	1656	0.02602	0	0	0.323954
mlclust_1480	chr16	19876777	19884367	-	7590	chr3	183113894	183118762	-	4868	902	733	0.10336	123	0.056299	0.142424
mlclust_1481	chr16	20547485	20548522	-	1037	chr3	183903203	183903777	-	574	1037	574	0.2874	114	0.636605	0.089507
mlclust_1482	chr16	20650766	20651715	-	949	chr3	184015036	184016978	-	1942	949	1942	0.34348	108	0.124889	0.00697
mlclust_1483	chr16	20800364	20803458	-	3094	chr3	184129223	184134206	-	4983	1064	1444	0.15152	0	0.050186	0.079955
mlclust_1484	chr16	21331974	21333429	-	1455	chr3	184428147	184429828	-	1681	1455	1681	0.07207	333	0.059467	18.1734
mlclust_1485	chr16	21794419	21809110	+	14691	chr3	185000995	185014168	+	13173	3955	3764	0.02474	150	0.01496	3.76504
mlclust_1486	chr16	21954552	21955030	-	478	chr3	185225205	185225619	-	414	478	414	0.07175	0	0	1.93218
mlclust_1487	chr16	22059088	22060465	-	1377	chr3	185361533	185362912	-	1379	1376	1378	0.00073	0	0.125825	7.63072
mlclust_1488	chr16	22466643	22469099	-	2456	chr3	185864991	185867633	-	2642	2456	2642	0.03648	0	0.028732	3.97224
mlclust_1489	chr16	23127865	23128988	+	1123	chr3	186524361	186533109	+	8748	1122	8747	0.77262	0	0.027485	0.045999
mlclust_1490	chr16	23526951	23529902	+	2951						2951			0	0.011956
mlclust_1491	chr16	23757264	23758965	-	1701	chr3	187265684	187267332	-	1648	1701	1648	0.01583	0	0.018965	0.007784
mlclust_1492	chr16	23989160	23992539	+	3379	chr3	187463707	187467274	+	3567	3379	3567	0.02707	0	0.038188	0.051699
mlclust_1493	chr16	24392643	24393528	-	885	chr3	187870674	187871639	-	965	639	677	0.02888	171	0.15465	1.50555
mlclust_1494	chr16	24989447	24992658	+	3211	chr3	188605069	188608455	+	3386	3211	3386	0.02653	0	0.099777	83.6928
mlclust_1495	chr16	25059724	25069144	+	9420	chr3	188666154	188676267	+	10113	2793	2813	0.00357	0	0.012398	0.259835
mlclust_1496	chr16	25902474	25903509	-	1035	chr3	189621693	189622996	-	1303	1035	1303	0.11463	0	0.026634	0.010388
mlclust_1497	chr16	25943095	25945619	-	2524	chr3	189656282	189659321	-	3039	2524	3039	0.09258	0	0.253871	0
mlclust_1498	chr16	26398663	26401862	-	3199	chr3	190062391	190063783	-	1392	3199	1392	0.3936	0	0.054095	0.037499
mlclust_1499	chr16	26730004	26755588	-	25584	chr3	190381697	190393184	-	11487	517	424	0.09883	99	2.81074	0.434931
mlclust_1500	chr16	26991980	26992659	+	679	chr3	190610548	190611232	+	684	679	684	0.00367	0	0	0
mlclust_1501	chr16	27450392	27452302	+	1910	chr3	191114254	191116220	+	1966	1910	1966	0.01445	0	0.041597	17.223
mlclust_1502	chr16	28157868	28159988	-	2120	chr3	191857041	191859243	-	2202	2120	2202	0.01897	0	0.430399	19.7414
mlclust_1503	chr16	28612494	28615180	-	2686	chr3	192304638	192307686	-	3048	2091	2135	0.01041	0	0.11592	0.106788
mlclust_1504	chr16	28630642	28632115	-	1473	chr3	192324826	192326861	-	2035	1473	2035	0.16021	0	0.01958	0.158168
mlclust_1505	chr16	28667777	28671132	-	3355	chr3	192353508	192355615	-	2107	3351	2103	0.22882	0	0.239022	0.331616
mlclust_1506	chr16	28681159	28683704	-	2545	chr3	192367688	192371125	-	3437	2544	1926	0.13826	0	0.135899	0.069635
mlclust_1507	chr16	29809474	29814194	-	4720	chr3	193582281	193587570	-	5289	4720	5289	0.05685	261	0.007553	0.032762
mlclust_1508	chr16	29903141	29904732	-	1591	chr3	193687913	193689936	-	2023	1591	2023	0.11954	0	0	0.008287
mlclust_1509	chr16	29944465	29946840	-	2375	chr3	193718223	193721793	-	3570	2375	3570	0.20101	0	0.022483	0.090995
mlclust_1510	chr16	29948723	29950618	-	1895	chr3	193723460	193724276	-	816	1893	816	0.39756	111	0.768272	0
mlclust_1511	chr16	30017203	30019506	+	2303	chr3	193798455	193800357	+	1902	2302	1853	0.10806	0	1.04224	0.063382
mlclust_1512	chr16	30021927	30039565	-	17638	chr3	193803851	193822460	-	18609	1209	722	0.2522	147	0.51554	0.469929
mlclust_1513	chr16	30384388	30386615	-	2227						2227			105	0
mlclust_1514	chr16	30510200	30513195	-	2995	chr3	194303996	194305999	-	2003	2994	1669	0.28415	0	0.271377	1.44357
mlclust_1515	chr16	31959762	31961969	-	2207	chr3	196659264	196661580	+	2316	2207	2316	0.0241	0	0.124904	4.5801
mlclust_1516	chr16	32230205	32231356	-	1151	chr3	196313060	196314150	+	1090	1151	1090	0.02722	96	0	8.98214
mlclust_1517	chr16	32303212	32304580	+	1368						1368			111	0.31303
mlclust_1518	chr16	33379940	33380813	-	873	chr3	125094245	125095208	+	963	737	821	0.05392	93	0	0.238421
mlclust_1519	chr16	33772771	33773726	+	955						955			0	0.073891
mlclust_1520	chr16	34351215	34353986	+	2771	chr3	123990700	123993374	-	2674	2771	2674	0.01781	0	0.317088	0.079574
mlclust_1521	chr16	34531978	34534727	-	2749	chr3	123795605	123798052	+	2447	2749	2447	0.05812	0	0.086053	0.046327
mlclust_1522	chr16	34559625	34562789	-	3164	chr3	123763230	123767234	+	4004	3164	4004	0.11719	93	0.128171	0.286966
mlclust_1523	chr16	34733405	34734586	+	1181	chr3	123619707	123620476	-	769	1181	769	0.21128	0	0.429987	0.021801
mlclust_1524	chr16	34746701	34749223	+	2522	chr3	123598963	123601353	-	2390	2519	2313	0.04263	0	0.127187	0
mlclust_1525	chr16	35001358	35002505	+	1147	chr3	123331159	123332285	-	1126	1147	1126	0.00924	0	0.138534	440.823
mlclust_1526	chr16	35234044	35236036	+	1992	chr3	123082184	123084288	-	2104	1992	2104	0.02734	0	0.034766	0.012194
mlclust_1527	chr16	35503255	35509505	-	6250	chr3	122774475	122778226	+	3751	477	294	0.23735	204	0.21778	0
mlclust_1528	chr16	36184297	36188194	+	3897	chr3	122044090	122044612	+	522	1856	422	0.6295	177	0.018657	79.0835
mlclust_1529	chr16	36894479	36895769	-	1290	chr3	121436479	121437807	+	1328	1290	1328	0.01451	138	0.812111	0.34654
mlclust_1530	chr16	37884244	37888942	+	4698	chr3	120043297	120049095	-	5798	4698	5798	0.1048	0	0.095818	6.61771
mlclust_1531	chr16	38085149	38089346	-	4197	chr3	119813553	119815373	+	1820	4195	1819	0.39508	90	0.102356	0.303602
mlclust_1533	chr16	40307070	40308718	+	1648	chr3	117409309	117410316	-	1007	1646	1007	0.24086	0	0.017522	0.013441
mlclust_1534	chr16	40323160	40327188	+	4028	chr3	117390141	117392622	-	2481	4028	2481	0.23767	0	0	0.074329
mlclust_1535	chr16	40354446	40357195	+	2749	chr3	117364661	117366218	-	1557	2749	1557	0.27682	0	0	0.064604
mlclust_1536	chr16	40476808	40478236	+	1428	chr3	117232462	117233840	-	1378	1428	1378	0.01782	0	0.024708	0.072995
mlclust_1537	chr16	40642487	40644478	+	1991	chr3	117070944	117072824	-	1880	1990	1879	0.02869	0	0.026833	0.01389
mlclust_1538	chr16	40776626	40778032	+	1406	chr3	116942859	116943387	-	528	1406	528	0.45398	0	0.025355	0.063502
mlclust_1539	chr16	40781846	40783799	+	1953	chr3	116938663	116941649	-	2986	1953	2986	0.20915	0	0.052004	0.013111
mlclust_1540	chr16	41222272	41222745	+	473	chr3	116508651	116508862	-	211	473	211	0.38304	0	0	0
mlclust_1541	chr16	42179958	42181815	+	1857	chr3	115521210	115523171	-	1961	1857	1961	0.02724	0	0.016215	23.98
mlclust_1542	chr16	42493341	42495253	-	1912	chr3	115187221	115189807	+	2586	1909	2583	0.15004	0	0	0.019471
mlclust_1543	chr16	42509574	42510992	-	1418	chr3	115173382	115174466	+	1084	1418	1084	0.13349	0	0.063705	0
mlclust_1544	chr16	42725814	42875693	-	149879	chr3	114866416	114981772	+	115356	4097	9495	0.39715	0	0.088195	0.074699
mlclust_1545	chr16	42884482	42912176	-	27694	chr3	114814240	114855013	+	40773	2523	2017	0.11145	0	4.72675	2.72876
mlclust_1546	chr16	42896786	42897534	+	748	chr3	114832319	114833021	-	702	748	702	0.03172	0	0.04717	0.121113
mlclust_1547	chr16	43627412	43630181	+	2769	chr3	114046214	114049207	-	2993	2769	2993	0.03888	0	0.011137	1.51454
mlclust_1548	chr16	43634921	43639104	+	4183	chr3	114036950	114041341	-	4391	4183	4391	0.02426	159	0.015424	5.41646
mlclust_1549	chr16	43640198	43642715	+	2517	chr3	114033365	114035917	-	2552	2516	2551	0.00691	0	0.126096	13.3038
mlclust_1550	chr16	43682215	43685170	+	2955						2955			0	0.082027
mlclust_1551	chr16	45357149	45358476	-	1327	chr3	112106574	112110142	+	3568	1327	3568	0.45781	0	0.028948	0.026426
mlclust_1552	chr16	46183264	46183717	-	453						453			0	0
mlclust_1553	chr16	48399565	48412529	-	12964	chr3	108855557	108869071	+	13514	628	638	0.0079	126	0.175582	7.48507
mlclust_1554	chr16	49800645	49804987	+	4342	chr3	107840397	107844385	-	3988	1210	1288	0.03122	0	0.028617	0.28635
mlclust_1555	chr16	49955942	49959025	+	3083	chr3	107717371	107720259	-	2888	510	343	0.19578	153	0.814755	0.146629
mlclust_1556	chr16	49979719	49997588	+	17869	chr3	107688813	107701202	-	12389	2296	2219	0.01705	0	0.015367	0
mlclust_1557	chr16	50042605	50044052	-	1447	chr3	107648421	107649442	+	1021	1447	1021	0.17261	0	0	0.084857
mlclust_1558	chr16	50590615	50654279	+	63664	chr3	107018809	107096833	-	78024	1362	831	0.24213	111	0.186422	12.7198
mlclust_1559	chr16	50719409	50732862	-	13453	chr3	106959526	106968836	+	9310	4167	2153	0.31867	99	0.041218	3.82525
mlclust_1560	chr16	50752452	50753589	+	1137	chr3	106927669	106928676	-	1007	1136	1006	0.06069	108	0.028997	0.166646
mlclust_1561	chr16	50783521	50784203	+	682	chr3	106862098	106862733	-	635	413	422	0.01078	0	0.129292	0.063561
mlclust_1562	chr16	52052396	52053190	+	794	chr3	105565947	105566808	-	861	794	861	0.04048	0	0.087222	0.608941
mlclust_1563	chr16	52241604	52244045	-	2441	chr3	105299427	105301406	+	1979	2440	1978	0.10457	90	0	0.006485
mlclust_1564	chr16	52829235	52971987	+	142752	chr3	104556030	104708260	-	152230	1015	173	0.70875	105	1.05065	0.704157
mlclust_1565	chr16	55840065	55843957	-	3892	chr3	101541099	101544248	+	3149	3892	3149	0.10552	93	0.00741	6.03186
mlclust_1566	chr16	57037079	57071485	-	34406	chr3	100238020	100295893	+	57873	4610	583	0.77547	0	0.051337	36.8139
mlclust_1567	chr16	57332063	57335545	+	3482	chr3	99851264	99853294	-	2030	2040	753	0.46079	0	0.094591	0.085287
mlclust_1568	chr16	57338422	57340516	+	2094	chr3	99843046	99845195	-	2149	1103	1160	0.02519	126	0.243789	0.115618
mlclust_1569	chr16	57361826	57365192	-	3366	chr3	99825805	99828078	+	2273	3366	2273	0.19383	0	0.587173	0.007376
mlclust_1570	chr16	57624378	57625608	-	1230	chr3	99516759	99518053	+	1294	1230	1294	0.02536	102	0.192409	19.3231
mlclust_1571	chr16	58404990	58408365	-	3375	chr3	98620790	98625192	+	4402	1277	1713	0.14582	0	0.030082	0.05872
mlclust_1572	chr16	59641854	59645871	-	4017	chr3	97477012	97480371	+	3359	4017	3359	0.08921	219	0.017567	2.02633
mlclust_1573	chr16	64763277	64765108	-	1831	chr3	88206940	88207637	+	697	1829	696	0.44871	0	0.058473	1.6367
mlclust_1574	chr16	64820905	64822069	-	1164	chr3	88142889	88143650	+	761	1163	756	0.21209	0	0.688704	0.070959
mlclust_1575	chr16	65861072	65863311	+	2239	chr3	86993318	86996057	-	2739	2239	2739	0.10044	0	0.026425	8.82273
mlclust_1576	chr16	69796385	69800626	-	4241	chr3	82231628	82235691	+	4063	540	457	0.08325	0	0.05341	0
mlclust_1577	chr16	70313120	70314592	-	1472	chr3	81810466	81812100	+	1634	1471	1633	0.05219	0	0.190893	0.40103
mlclust_1578	chr16	72027865	72029928	+	2063	chr3	79815113	79817185	-	2072	2063	2072	0.00218	0	0	0.040455
mlclust_1579	chr16	72118449	72119689	+	1240	chr3	79686575	79688030	-	1455	1239	1455	0.08018	0	0	0
mlclust_1580	chr16	72159191	72160483	+	1292						1284			0	0.025124
mlclust_1581	chr16	72176315	72177560	+	1245	chr3	79612577	79613347	-	770	1245	770	0.23573	0	0	0
mlclust_1582	chr16	72220696	72221960	+	1264	chr3	79565083	79565444	-	361	1264	361	0.55569	0	0.027914	0.078589
mlclust_1583	chr16	72226627	72234572	-	7945	chr3	79540096	79559187	+	19091	1926	1819	0.02857	0	0.438659	0.294135
mlclust_1584	chr16	72341160	72344055	+	2895	chr3	79427339	79429398	-	2059	2895	2059	0.16875	0	0.010401	0
mlclust_1585	chr16	72358695	72360904	+	2209	chr3	79407910	79409317	-	1407	2209	1407	0.22179	0	0.143751	0
mlclust_1586	chr16	72412989	72415688	+	2699	chr3	79345419	79346852	-	1433	2698	1433	0.30622	0	0.01069	0.009106
mlclust_1587	chr16	72483637	72486462	+	2825	chr3	79250131	79252894	-	2763	2824	2762	0.0111	153	0.095447	0.00607
mlclust_1588	chr16	73099151	73204257	+	105106	chr3	78429133	78553166	-	124033	1030	844	0.09925	198	0.907701	0.083947
mlclust_1589	chr16	73471963	73472708	+	745	chr3	78114829	78115429	-	600	745	600	0.10781	0	0	0
mlclust_1590	chr16	74526819	74529313	-	2494	chr3	76947508	76950070	+	2562	2492	2562	0.01385	0	0.101889	0.020374
mlclust_1591	chr16	74692458	74695626	-	3168	chr3	76789760	76794364	+	4604	3164	4600	0.18496	0	0	0.007289
mlclust_1592	chr16	74807907	74810254	-	2347	chr3	76676251	76680784	+	4533	2347	4533	0.31773	129	0.011284	0.021656
mlclust_1593	chr16	74873283	74876183	-	2900	chr3	76602372	76604455	+	2083	2898	2081	0.16409	90	0	0.28304
mlclust_1594	chr16	74921711	74923463	-	1752	chr3	76534877	76535931	+	1054	1752	1054	0.24875	0	0.028985	0.047717
mlclust_1595	chr16	74998153	75002534	-	4381	chr3	76457833	76460532	+	2699	4381	2699	0.23757	0	0.487537	0.012423
mlclust_1596	chr16	75010943	75011335	-	392	chr3	76452076	76452526	+	450	392	450	0.06888	0	0	0.074509
mlclust_1597	chr16	75024698	75026147	-	1449	chr3	76435203	76436349	+	1146	1449	1146	0.11676	0	0.023323	0
mlclust_1598	chr16	75032151	75035176	-	3025	chr3	76423991	76427613	+	3622	3025	3622	0.08981	0	0.00891	0.019561
mlclust_1599	chr16	75196117	75198602	-	2485	chr3	76241586	76242328	+	742	2485	742	0.54013	0	0.012982	0
mlclust_1600	chr16	76287650	76288890	-	1240	chr21	16333243	16334479	-	1236	1240	1236	0.00162	129	0.040953	10.1549
mlclust_1601	chr16	76383351	76398371	+	15020	chr21	16446960	16458533	+	11573	1281	1318	0.01424	0	1.58935	0.102934
mlclust_1602	chr16	77413887	77415161	+	1274	chr21	17674647	17675705	+	1058	1274	1058	0.09262	90	0.318314	0.140728
mlclust_1603	chr16	77616555	77618579	+	2024	chr21	17933790	17935582	+	1792	2024	1792	0.0608	0	0	0.558375
mlclust_1604	chr16	77646584	77649671	+	3087	chr21	17962633	17965892	+	3259	3087	3259	0.0271	0	0.012444	0.396096
mlclust_1605	chr16	77654775	77655683	+	908	chr21	17971320	17972879	+	1559	906	1557	0.26431	0	0.0424	0.344552
mlclust_1606	chr16	77685521	77687654	+	2133	chr21	18005816	18007983	+	2167	2133	2167	0.00791	0	0.027782	0.106557
mlclust_1607	chr16	78477986	78480784	-	2798	chr21	19088049	19098020	-	9971	2798	9971	0.56175	114	0.02522	0.055386
mlclust_1608	chr16	78489924	78493200	-	3276						3273			0	0.163145
mlclust_1609	chr16	78695278	78709325	+	14047	chr21	19351592	19362203	+	10611	2208	2475	0.05701	0	0.031365	0.057998
mlclust_1610	chr16	81333036	81335504	+	2468	chr21	22543245	22545076	+	1831	2468	1831	0.14817	0	0.012006	0.051495
mlclust_1611	chr16	81871754	81873980	+	2226						2226			123	0.012384
mlclust_1612	chr16	82147977	82149006	-	1029						1029			0	0.830282
mlclust_1613	chr16	84713276	84715489	+	2213	chr21	26945097	26947232	+	2135	1253	1088	0.07048	0	0.080912	2.80091
mlclust_1614	chr16	85453110	85455371	-	2261	chr21	27838540	27840278	-	1738	2261	1738	0.13078	117	0.046815	17.6516
mlclust_1615	chr16	85819455	85827014	+	7559	chr21	28253518	28260433	+	6915	904	528	0.26257	123	0.107055	0.025635
mlclust_1616	chr16	85900757	85901309	-	552	chr21	28338913	28339408	-	495	552	495	0.05444	0	0.278364	4.66615
mlclust_1617	chr16	85900993	85904237	+	3244	chr21	28339121	28342229	+	3108	3244	3108	0.02141	0	0.419487	0.37386
mlclust_1618	chr16	86139548	86150921	-	11373	chr21	28635085	28647492	-	12407	537	460	0.07723	96	0.071535	0.226949
mlclust_1619	chr16	86770471	86806758	-	36287	chr21	29587428	29616757	-	29329	782	397	0.32655	0	0.315477	0.54551
mlclust_1620	chr16	87001171	87024042	-	22871	chr21	29826864	29860122	-	33258	1805	1968	0.0432	135	0.016415	0.109035
mlclust_1621	chr16	87731761	87733585	+	1824	chr21	30716660	30718462	+	1802	1824	1802	0.00607	0	0.05855	29.8156
mlclust_1622	chr16	87760896	87765149	-	4253	chr21	30753802	30757642	-	3840	4251	3840	0.0508	93	0.051877	0.125599
mlclust_1623	chr16	89084335	89084779	+	444	chr21	31859507	31859719	-	212	444	212	0.35366	246	0	0
mlclust_1624	chr16	89174979	89175437	+	458	chr21	32007528	32007844	+	316	458	316	0.18346	156	0	0
mlclust_1625	chr16	90103524	90104408	-	884	chr21	32880175	32880604	-	429	884	429	0.34653	0	0.039913	0.089708
mlclust_1626	chr16	90116006	90119829	-	3823	chr21	32891946	32895861	-	3915	3823	3915	0.01189	0	0.083805	0.024257
mlclust_1627	chr16	90935211	90935873	+	662	chr21	33984809	33985084	+	275	662	275	0.41302	0	0.089516	4.08095
mlclust_1628	chr16	91222344	91223171	-	827	chr21	34394740	34395606	-	866	827	866	0.02304	0	0.099999	0.154869
mlclust_1629	chr16	91465348	91470366	+	5018						776			0	0.3272
mlclust_1630	chr16	91918556	91920818	+	2262	chr21	35267610	35270181	+	2571	2261	2570	0.06396	0	0	2.72017
mlclust_1631	chr16	91931481	91963160	+	31679	chr21	35287672	35320480	+	32808	2331	2437	0.02223	291	0.942985	1.18129
mlclust_1632	chr16	93883239	93884706	-	1467	chr21	37757635	37758362	-	727	1462	727	0.33577	0	0.24314	0.06918
mlclust_1633	chr16	94081895	94084111	-	2216	chr21	38067900	38069912	-	2012	2216	2012	0.04825	99	0.137495	0.194144
mlclust_1634	chr16	94533823	94535178	-	1355						1355			0	0.02835
mlclust_1635	chr16	95922818	95923967	-	1149	chr21	40176341	40177710	-	1369	1149	1369	0.08737	0	0.187671	0.168835
mlclust_1636	chr16	96027635	96029924	-	2289	chr21	40321978	40323998	-	2020	1702	1779	0.02212	0	0.017381	0
mlclust_1637	chr16	96122043	96123333	+	1290	chr21	40436754	40437946	+	1192	663	686	0.01705	0	0.106434	0
mlclust_1638	chr16	96403039	96413852	-	10813	chr21	40802316	40817701	-	15385	2196	246	0.79853	0	0.538616	8.22228
mlclust_1639	chr16	97681034	97684512	-	3478						3478			0	0.010145
mlclust_1640	chr16	98169006	98169931	-	925	chr21	43408752	43409729	-	977	925	977	0.02734	0	0.166691	5.22586
mlclust_1641	chr17	3083927	3084986	+	1059						1053			0	12.1295
mlclust_1642	chr17	4120216	4122113	-	1897	chr6	156209212	156210528	-	1316	430	387	0.05263	0	0.392957	0
mlclust_1643	chr17	4851697	4854482	-	2785	chr6	156958999	156961170	-	2171	1482	1432	0.01716	0	0.155589	0
mlclust_1644	chr17	5051356	5053062	+	1706	chr6	157161584	157163211	+	1627	1706	1627	0.0237	159	0.016159	0.06623
mlclust_1645	chr17	5227875	5231141	+	3266	chr6	157391296	157396338	+	5042	3265	5041	0.21382	0	0.245569	0.081606
mlclust_1646	chr17	5250527	5253864	+	3337	chr6	157414239	157418184	+	3945	3337	3945	0.08349	153	0.010683	0.104278
mlclust_1647	chr17	5343921	5347654	+	3733	chr6	157529836	157534723	+	4887	3733	4887	0.13387	0	0.052945	2.25151
mlclust_1648	chr17	5799489	5803240	+	3751	chr6	158181377	158184368	+	2991	1175	850	0.16049	0	0.30752	0.100025
mlclust_1649	chr17	6117514	6120035	+	2521	chr6	158673023	158679097	+	6074	2521	6074	0.41338	135	0.042362	0.042038
mlclust_1650	chr17	7002738	7032339	-	29601	chr6	159260575	159290854	-	30279	1442	712	0.3389	0	0.88849	1.93255
mlclust_1651	chr17	7012857	7022878	+	10021	chr6	159271178	159282739	+	11561	1299	1625	0.11149	141	1.34577	0.30553
mlclust_1652	chr17	7213875	7216081	+	2206	chr6	167288934	167291600	-	2666	2206	2666	0.09442	0	0	0.021283
mlclust_1653	chr17	8017395	8020167	-	2772	chr6	159590431	159593005	+	2574	2772	2574	0.03704	129	0.036639	0.024943
mlclust_1654	chr17	8131269	8134896	-	3627						3627			0	0
mlclust_1655	chr17	9358238	9360789	-	2551	chr6	165348624	165349854	+	1230	2550	1230	0.34921	117	0.066263	0.010609
mlclust_1656	chr17	9360181	9361146	+	965	chr6	165341616	165341934	-	318	964	318	0.5039	0	0.195726	0
mlclust_1657	chr17	10040329	10042053	-	1724	chr6	164431723	164432944	+	1221	1718	1221	0.16911	0	0	0.054921
mlclust_1658	chr17	10395468	10397988	-	2520	chr6	163996469	163999291	+	2822	2520	2822	0.05653	0	0.026143	12.2259
mlclust_1659	chr17	10492641	10495086	-	2445	chr6	163854958	163857879	+	2921	2445	2921	0.08871	0	0	0.241052
mlclust_1660	chr17	10512791	10515471	+	2680	chr6	163831537	163834962	-	3425	2680	3425	0.12203	0	0.013165	0.5629
mlclust_1661	chr17	12970229	12971495	+	1266	chr6	160384288	160384626	-	338	1266	338	0.57855	93	0.045222	0.463298
mlclust_1662	chr17	13679886	13898367	-	218481	chr6	167859538	168228440	-	368902	4423	3608	0.10148	114	1.29087	1.70715
mlclust_1663	chr17	14035830	14042802	+	6972	chr6	168366330	168372703	+	6373	2662	2953	0.05183	273	0.010356	13.424
mlclust_1664	chr17	14238825	14242319	-	3494	chr6	168457473	168457999	-	526	1077	525	0.34457	123	0.055917	1.17534
mlclust_1665	chr17	15344565	15346353	+	1788						1787			0	0.239049
mlclust_1666	chr17	15511979	15516439	+	4460	chr6	170598975	170603575	+	4600	3933	4015	0.01032	0	0.149672	0.356461
mlclust_1667	chr17	16629864	16632539	-	2675	chr5	97214652	97218181	-	3529	2675	3529	0.13765	0	0.012945	0.009501
mlclust_1668	chr17	17088540	17089026	+	486						486			0	0.508189
mlclust_1669	chr17	17531301	17531860	+	559	chr5	96497422	96498099	-	677	559	677	0.09547	0	0.115418	2.52019
mlclust_1670	chr17	17658378	17660187	-	1809	chr5	96371419	96373212	+	1793	1809	1793	0.00444	102	0.063705	29.6983
mlclust_1671	chr17	17659825	17664545	+	4720	chr5	96366511	96371773	-	5262	4720	5262	0.0543	0	11.6197	17.9683
mlclust_1672	chr17	17763543	17764806	+	1263	chr5	96268433	96269422	-	989	1262	988	0.12178	0	0	0.057431
mlclust_1673	chr17	22099552	22208135	+	108583						1338	119	0.83665	180	107.763
mlclust_1674	chr17	23687765	23702258	+	14493	chr16	3184914	3200120	-	15206	1624	788	0.3466	0	1.89447	19.5743
mlclust_1675	chr17	23837154	23838170	+	1016	chr16	3052924	3054151	-	1227	1016	1227	0.09407	141	0.249909	0.055157
mlclust_1676	chr17	23927670	23931208	+	3538						2094			0	0.102001
mlclust_1677	chr17	24549374	24551372	-	1998	chr16	2318403	2320397	+	1994	1998	1994	0.001	0	0.300204	0.10671
mlclust_1678	chr17	24856477	24856894	-	417	chr16	2015011	2015503	+	492	165	212	0.12467	0	0.189093	2.80234
mlclust_1679	chr17	25320758	25321405	-	647						647			0	0.078488
mlclust_1680	chr17	25707860	25711979	+	4119	chr16	1025751	1031265	-	5514	1234	1499	0.09696	153	0.048803	4.10448
mlclust_1681	chr17	25970057	25971204	+	1147	chr16	728483	729945	-	1462	1145	1460	0.12092	0	2.48425	0.053628
mlclust_1682	chr17	25998654	25999912	+	1258	chr16	698925	699090	-	165	1258	165	0.7681	0	0.305359	0.164066
mlclust_1683	chr17	26420898	26422449	+	1551						1550	141	0.83323	0	0.02234
mlclust_1684	chr17	26691198	26698444	-	7246	chr5	172253674	172261284	-	7610	421	212	0.33017	0	0.846775	0.264603
mlclust_1685	chr17	27021550	27023210	-	1660	chr5	172708931	172710947	-	2016	1660	2016	0.09684	99	0.083439	0.013305
mlclust_1686	chr17	27372019	27385011	-	12992	chr6	33786891	33796636	-	9745	2579	1973	0.13313	147	0.109447	0.046298
mlclust_1687	chr17	27460855	27461998	-	1143	chr6	33859890	33860569	-	679	1143	679	0.25467	0	0.030295	14.0874
mlclust_1688	chr17	27462298	27463953	+	1655	chr6	33860890	33862659	+	1769	1655	1769	0.03329	0	0	0.302449
mlclust_1689	chr17	27535107	27536145	+	1038	chr6	33947281	33948573	+	1292	1037	1291	0.10911	0	0	0.025972
mlclust_1690	chr17	27682659	27684281	-	1622	chr6	34191338	34191842	-	504	1622	504	0.52587	237	0	0
mlclust_1691	chr17	27888181	27889921	-	1740	chr6	34555059	34557139	-	2080	1740	2080	0.08901	144	0.059702	44.8256
mlclust_1692	chr17	28036642	28036985	+	343	chr6	34844936	34845289	+	353	343	353	0.01437	0	0.175576	5.54514
mlclust_1693	chr17	29088805	29089327	-	522	chr6	36410110	36410670	-	560	522	560	0.03512	159	0	0.068723
mlclust_1694	chr17	29789172	29795258	-	6086						2481			117	0.231561
mlclust_1695	chr17	29854016	29855187	+	1171	chr6	37467743	37468500	+	757	1171	757	0.21473	0	0	0.088585
mlclust_1696	chr17	29855729	29856098	+	369	chr6	37470017	37470359	+	342	369	342	0.03797	0	0	0.098039
mlclust_1697	chr17	30713244	30714374	+	1130	chr6	38607734	38609219	+	1485	1130	1485	0.13576	153	0.073185	0.259158
mlclust_1698	chr17	30759393	30761234	-	1841						336			96	0.309171
mlclust_1699	chr17	31649322	31650975	+	1653	chr21	44299765	44300585	+	820	1653	820	0.33684	0	1.08944	0.477423
mlclust_1700	chr17	32049610	32050265	+	655	chr21	44909019	44910636	+	1617	655	1617	0.42342	0	0.040432	0.080702
mlclust_1701	chr17	32902616	32905106	-	2490						2490			0	0.021445
mlclust_1702	chr17	32925338	32926536	+	1198	chr19	12626075	12626719	+	644	885	644	0.15762	0	0.030457	0.210178
mlclust_1703	chr17	33236679	33237434	-	755						755			0	0.431693
mlclust_1704	chr17	33493642	33495823	-	2181						2180			0	0.015884
mlclust_1705	chr17	35399213	35400549	-	1336	chr6	31324508	31325777	+	1269	1336	1269	0.02572	150	13.4258	59.5423
mlclust_1706	chr17	35786652	35787514	+	862	chr6	30899125	30900059	-	934	506	562	0.05243	231	0	16.9654
mlclust_1707	chr17	35909394	35917632	+	8238	chr6	30749222	30755696	-	6474	1475	807	0.29273	0	0.502332	0.020774
mlclust_1708	chr17	35996597	35998519	-	1922	chr6	30658560	30659070	+	510	1922	510	0.58059	264	0.548334	0.434985
mlclust_1709	chr17	37060736	37070377	+	9641	chr6	30058676	30065541	-	6865	655	434	0.20294	0	0.465174	0.733935
mlclust_1710	chr17	37218169	37218990	+	821						821			105	0
mlclust_1711	chr17	42471811	42474867	+	3056	chr6	48014907	48018051	-	3144	3054	3142	0.0142	0	0	0.057488
mlclust_1712	chr17	42477500	42480145	+	2645	chr6	48010645	48012706	-	2061	2645	2061	0.1241	0	0.040376	0.031122
mlclust_1713	chr17	43268986	43270099	-	1113	chr6	47142316	47142691	+	375	1113	375	0.49597	105	0	0
mlclust_1714	chr17	43286310	43295240	-	8930	chr6	47114792	47126239	+	11447	3416	2862	0.08824	0	0.078158	0.025948
mlclust_1715	chr17	44230505	44233426	+	2921	chr6	46114210	46116317	-	2107	2921	2107	0.16189	0	0.27449	1.16167
mlclust_1716	chr17	44242876	44244275	+	1399	chr6	46096120	46097721	-	1601	1399	1601	0.06733	0	0.024751	0.285281
mlclust_1717	chr17	44503516	44504852	-	1336	chr6	45783500	45784823	+	1323	718	739	0.01441	0	0.053502	0
mlclust_1718	chr17	45284185	45288578	+	4393	chr6	44757786	44761142	-	3356	4392	3355	0.13386	120	0.138747	0.007779
mlclust_1719	chr17	45640457	45641814	-	1357						1356			0	0.024922
mlclust_1720	chr17	45871454	45918201	+	46747	chr6	43999882	44043850	-	43968	2634	992	0.45284	120	0.174137	0.557694
mlclust_1721	chr17	46002028	46003928	+	1900	chr6	43903927	43906094	-	2167	1900	2167	0.06565	0	0.146074	0.087446
mlclust_1722	chr17	46752943	46756571	-	3628	chr6	43057332	43062144	+	4812	3628	4812	0.14028	120	0.073591	0.023583
mlclust_1723	chr17	47498212	47498903	+	691	chr6	42192985	42193638	-	653	691	653	0.02827	0	0.372837	3.89153
mlclust_1724	chr17	47824558	47828032	+	3474	chr6	41752265	41755696	-	3431	2944	2796	0.02578	90	1.75021	2.3236
mlclust_1725	chr17	48201738	48227328	-	25590	chr6	41349544	41374297	+	24753	1829	816	0.38299	102	0.291601	0.479763
mlclust_1726	chr17	51989563	51991840	+	2277	chr3	18504575	18505524	+	949	2274	785	0.48676	0	0.029722	0.175413
mlclust_1727	chr17	52021044	52021706	+	662	chr3	18522788	18523362	+	574	662	574	0.0712	0	0	0.321271
mlclust_1728	chr17	52068627	52071101	+	2474						2472			0	0
mlclust_1729	chr17	52490818	52492163	+	1345	chr3	18933372	18934610	+	1238	1345	1238	0.04142	0	0	0
mlclust_1730	chr17	52608098	52609290	+	1192	chr3	19039587	19040785	+	1198	1192	1198	0.00251	0	0	0.033895
mlclust_1731	chr17	53828792	53832190	+	3398	chr3	20231386	20231899	+	513	3396	513	0.73753	0	2.25893	0
mlclust_1732	chr17	56091472	56092586	-	1114	chr19	4229081	4229774	-	693	1114	693	0.23298	0	0.479331	0.163756
mlclust_1733	chr17	56381138	56382224	+	1086	chr19	4769083	4770504	+	1421	745	961	0.12661	0	0	1.34434
mlclust_1734	chr17	56767565	56774017	+	6452						1324	249	0.68341	390	0.444608
mlclust_1735	chr17	57218012	57218969	+	957	chr19	6481868	6481996	+	128	957	128	0.76406	0	0.278651	0
mlclust_1736	chr17	58756917	58759192	+	2275						2273			0	0
mlclust_1737	chr17	61097677	61098494	-	817	chr5	105071795	105071882	-	87	815	87	0.8071	90	0.173167	0
mlclust_1738	chr17	63383113	63384920	-	1807	chr5	107168472	107169792	-	1320	1807	1320	0.15574	0	0.049192	0
mlclust_1739	chr17	63395302	63398520	-	3218	chr5	107178907	107181938	-	3031	3218	3031	0.02992	0	0.082967	0
mlclust_1740	chr17	64211349	64213677	-	2328	chr5	108082265	108084971	-	2706	2328	2706	0.07509	0	0.245924	0.655264
mlclust_1741	chr17	65116450	65117271	+	821	chr5	109213218	109213911	+	693	727	591	0.10319	177	0	0
mlclust_1742	chr17	66542691	66549160	+	6469						3450			102	0.015981
mlclust_1743	chr17	66799193	66801939	+	2746	chr18	8703001	8705112	-	2111	2745	2111	0.13056	0	0.070297	0.031766
mlclust_1744	chr17	69183828	69185883	-	2055	chr18	5896099	5897797	+	1698	2055	1698	0.09512	0	0.017348	0.07637
mlclust_1745	chr17	69449822	69451835	+	2013	chr18	5604378	5606958	-	2580	2013	2580	0.12345	0	0.015499	0.048921
mlclust_1746	chr17	69765999	69788644	-	22645	chr18	5197280	5215594	+	18314	4402	3260	0.14905	246	0.545211	0.113135
mlclust_1747	chr17	69822944	69825215	-	2271	chr18	5154441	5157077	+	2636	822	1764	0.36427	93	0.324415	0.009504
mlclust_1748	chr17	71202536	71204037	+	1501	chr18	3446666	3448058	-	1392	1501	1392	0.03768	0	0.280852	0.661215
mlclust_1749	chr17	71240368	71242249	-	1881	chr18	3392721	3394307	+	1586	1881	1586	0.08509	0	0.01715	0
mlclust_1750	chr17	71493877	71531327	+	37450	chr18	3015646	3052227	-	36581	1562	399	0.59306	114	0.325105	0.784936
mlclust_1751	chr17	78774907	78775919	+	1012	chr2	36777176	36778169	+	993	1012	993	0.00948	0	0.091417	65.4325
mlclust_1752	chr17	79049250	79051415	-	2165	chr2	37070941	37072918	-	1977	2159	1973	0.04501	0	0.07117	6.22832
mlclust_1753	chr17	79138647	79138949	-	302	chr2	37195529	37195590	-	61	302	61	0.66391	0	0	0
mlclust_1754	chr17	79754038	79757362	+	3324	chr2	37898443	37902574	+	4131	2504	3342	0.14335	0	0.628757	0.509414
mlclust_1755	chr17	79874963	79877225	-	2262	chr2	38012767	38014753	-	1986	1616	1769	0.0452	177	0	0.130075
mlclust_1756	chr17	80211054	80213032	+	1978						437			0	0
mlclust_1757	chr17	80462140	80463606	+	1466	chr2	38830726	38831885	+	1159	1466	1159	0.11695	0	0.072952	0.077479
mlclust_1758	chr17	80728188	80728711	+	523						523			0	0
mlclust_1759	chr17	80771196	80772882	-	1686	chr2	39185586	39187530	-	1944	1686	1944	0.07107	105	0.931425	0.443041
mlclust_1760	chr17	80793365	80796427	-	3062	chr2	39208702	39211824	-	3122	3062	3122	0.0097	0	1.30635	9.04392
mlclust_1761	chr17	81127469	81128808	+	1339	chr2	39664406	39666179	+	1773	1339	1773	0.13946	0	0.518422	0.073602
mlclust_1762	chr17	81252652	81254384	-	1732						1732			0	0
mlclust_1763	chr17	81407215	81408478	+	1263	chr2	39949512	39950217	+	705	1263	705	0.28354	0	0.047682	0.114635
mlclust_1764	chr17	82081510	82082323	-	813	chr2	40692472	40692866	-	394	813	394	0.34714	0	0.06568	0.180017
mlclust_1765	chr17	83432933	83477565	-	44632	chr2	42087750	42129578	-	41828	1541	608	0.43416	0	0.400232	2.57557
mlclust_1766	chr17	84031581	84033195	+	1614	chr2	42721485	42723253	+	1768	1614	1768	0.04554	0	0.094389	0.465001
mlclust_1767	chr17	84220860	84223054	+	2194	chr2	42981957	42984084	+	2127	2193	2126	0.01551	0	0.071136	4.0847
mlclust_1768	chr17	84251014	84253733	-	2719						1617			129	0.282643
mlclust_1769	chr17	84317276	84320946	+	3670	chr2	43106746	43109579	+	2833	1853	1763	0.02489	96	0.015565	0.057055
mlclust_1770	chr17	84338372	84341982	+	3610	chr2	43134209	43140741	+	6532	3610	6532	0.28811	0	0.019547	0.010266
mlclust_1771	chr17	84477999	84489215	+	11216	chr2	43306343	43320076	+	13733	1786	1391	0.12433	120	0.562254	1.80504
mlclust_1772	chr17	84496211	84497050	+	839	chr2	43328248	43329109	+	861	839	861	0.01294	120	0.206359	0.105428
mlclust_1773	chr17	85672190	85675846	+	3656	chr2	44785009	44788433	+	3424	3656	3424	0.03277	0	0	0.050919
mlclust_1774	chr17	86090544	86095398	+	4854	chr2	45239593	45244215	+	4622	4853	4621	0.02449	0	0.007135	0.023433
mlclust_1775	chr17	86564806	86566817	-	2011	chr2	45876120	45878130	-	2010	1142	1021	0.05594	255	0.051891	0.461739
mlclust_1776	chr17	86600874	86604975	+	4101	chr2	45910764	45914991	+	4227	4101	4227	0.01513	0	0.008603	0.13088
mlclust_1777	chr17	86842674	86844126	-	1452	chr2	46161082	46163385	-	2303	1452	2303	0.22663	0	0.310022	0.110871
mlclust_1778	chr17	87314960	87316600	-	1640	chr2	46705272	46706552	-	1280	1640	1280	0.12329	0	0.021114	0
mlclust_1779	chr17	87360926	87362337	-	1411	chr2	46768099	46769589	-	1490	1411	1490	0.02723	150	0.107969	1.1762
mlclust_1780	chr17	87591555	87594282	-	2727	chr2	47062880	47065012	+	2132	1396	847	0.24476	90	0.07661	0.01598
mlclust_1781	chr17	87679571	87682119	-	2548	chr2	47166467	47168242	-	1775	2548	1775	0.17881	0	0.07405	0.021917
mlclust_1782	chr17	88695409	88704676	-	9267						352			0	0.549873
mlclust_1783	chr17	89719566	89726673	+	7107	chr2	49508826	49514480	+	5654	977	431	0.38778	129	0.070885	0.062234
mlclust_1784	chr17	90432983	90435817	-	2834	chr2	50145657	50148535	-	2878	2834	2878	0.0077	0	0.062731	28.6886
mlclust_1785	chr17	91163644	91164825	-	1181	chr2	50925676	50927276	-	1600	1181	1600	0.15067	0	0	0.025146
mlclust_1786	chr17	91277452	91278708	-	1256	chr2	51041713	51041971	-	258	1254	258	0.65873	0	0.127745	0
mlclust_1787	chr17	91360940	91362384	-	1444	chr2	51118997	51120063	-	1066	1444	1066	0.1506	0	0	0.031453
mlclust_1788	chr18	4681080	4682866	+	1786	chr10	30303817	30305838	-	2021	1786	2021	0.06173	0	0.054187	13.1548
mlclust_1789	chr18	5162877	5165729	-	2852	chr10	31073641	31077658	-	4017	1729	2930	0.25778	0	0.074631	0.008757
mlclust_1790	chr18	5348255	5361859	-	13604	chr10	31342484	31354345	-	11861	2481			0	0.028442
mlclust_1791	chr18	5512484	5514436	-	1952	chr10	31548271	31548943	-	672	1952	672	0.4878	96	0	0.135933
mlclust_1792	chr18	5518412	5521090	-	2678	chr10	31553631	31554587	-	956	2678	956	0.47386	0	0.028689	0.059353
mlclust_1793	chr18	5572821	5575053	-	2232	chr10	31593831	31594734	-	903	2232	903	0.42392	0	0	0.028721
mlclust_1794	chr18	7004960	7006403	+	1443	chr10	28034975	28036601	+	1626	1443	1626	0.05963	0	0.26151	0.091343
mlclust_1795	chr18	7150341	7151775	-	1434	chr10	28178325	28179268	-	943	1434	943	0.20656	0	0	0.055353
mlclust_1796	chr18	9215037	9218135	+	3098	chr10	35924975	35928212	-	3237	3098	3237	0.02194	0	0.09835	1.35653
mlclust_1797	chr18	10307100	10307818	-	718	chr18	18784491	18785261	-	770	718	770	0.03495	0	0	0.055268
mlclust_1798	chr18	10327893	10328800	+	907	chr18	18825142	18826827	+	1685	907	1685	0.30015	0	0	0.074906
mlclust_1799	chr18	10706857	10711830	+	4973	chr18	19284876	19305120	+	20244	1545	1320	0.07853	0	0.021873	2.10233
mlclust_1800	chr18	10812907	10817748	+	4841	chr18	19445371	19450124	+	4753	4841	4753	0.00917	0	0.030555	6.44472
mlclust_1801	chr18	11003685	11048675	-	44990						3015	1653	0.29177	0	6.53615
mlclust_1802	chr18	11019047	11019819	+	772						772			0	0.049759
mlclust_1803	chr18	11049084	11051485	-	2401	chr18	19746067	19748476	-	2409	1965	1975	0.00254	0	0.017956	1.48034
mlclust_1804	chr18	11996599	11999378	-	2779	chr18	20713804	20716962	-	3158	2779	3158	0.06384	261	0.227542	0.138907
mlclust_1805	chr18	14156515	14157972	+	1457	chr18	22959678	22969951	+	10273	1456	10272	0.75171	0	0.118912	0.006897
mlclust_1806	chr18	14390817	14437051	+	46234	chr18	23219087	23262109	+	43022	1271	1303	0.01243	147	0.399539	0.054433
mlclust_1807	chr18	14841533	14842289	+	756	chr18	23670818	23671714	+	896	756	896	0.08475	0	0.039131	0.058257
mlclust_1808	chr18	15353290	15373205	+	19915	chr18	24276068	24291559	+	15491	1595			198	0.07233
mlclust_1809	chr18	15378129	15379407	-	1278	chr18	24294025	24295259	-	1234	1278	1234	0.01752	0	0.15894	1.39303
mlclust_1810	chr18	15467366	15471208	-	3842	chr18	24357001	24360462	-	3461	1774	1814	0.01115	0	0	0.022276
mlclust_1811	chr18	17727254	17739499	-	12245	chr18	26404901	26410102	-	5201	862	740	0.07615	0	0.200853	0
mlclust_1812	chr18	21144121	21145755	+	1634	chr18	29651710	29653045	+	1335	1634	1335	0.10071	0	0.289547	10.6896
mlclust_1813	chr18	21346253	21348551	-	2298	chr18	29917000	29923596	-	6596	2296	6594	0.48346	0	0	0.028474
mlclust_1814	chr18	21403128	21404257	-	1129						1129			0	0.034025
mlclust_1815	chr18	22329990	22331726	+	1736	chr18	31021152	31023586	+	2434	1733	2431	0.16763	246	0	0.440174
mlclust_1816	chr18	22494538	22496530	-	1992	chr18	31150387	31152391	-	2004	1908	1918	0.00261	0	0.032325	0.042136
mlclust_1817	chr18	22685843	22690207	+	4364	chr18	31328408	31332700	+	4292	4364	4292	0.00832	0	0.007935	0.630655
mlclust_1818	chr18	24497866	24503131	+	5265	chr18	33364794	33366600	+	1806	3154	251	0.85257	0	0	0
mlclust_1819	chr18	26155205	26157634	-	2429	chr18	35343291	35344833	-	1542	2423	1541	0.2225	0	0.111578	0
mlclust_1820	chr18	26372864	26374149	+	1285	chr18	35580868	35581331	+	463	1285	463	0.47025	0	0.041554	0
mlclust_1821	chr18	29607479	29656225	-	48746	chr18	38725638	38778984	-	53346	543	212	0.43841	108	0.129955	0.467057
mlclust_1822	chr18	31599971	31608751	+	8780	chr18	40850440	40859267	+	8827	2498	2623	0.02441	0	17.0567	4.56345
mlclust_1823	chr18	31792919	31793861	-	942	chr2	128785808	128786711	+	903	942	903	0.02114	0	0.057228	0.072257
mlclust_1824	chr18	31918149	31920135	-	1986	chr2	128643102	128645334	+	2232	1986	2232	0.05832	0	0.59583	0.982814
mlclust_1825	chr18	31947143	31948498	-	1355						1355			0	0.078117
mlclust_1826	chr18	32069795	32070237	-	442	chr2	128459798	128460256	+	458	442	458	0.01778	162	0.574451	5.82202
mlclust_1827	chr18	32272113	32280067	-	7954						1364	427	0.52317	288	0.108614
mlclust_1828	chr18	32389815	32394820	+	5005	chr2	128057966	128063192	-	5226	5004	5225	0.02161	0	0.011824	10.2061
mlclust_1829	chr18	32395134	32396398	+	1264	chr2	128056250	128057642	-	1392	1264	1392	0.04819	0	0.024684	6.96049
mlclust_1830	chr18	32823295	32996941	-	173646	chr5	110280128	110428044	-	147916	1616	554	0.4894	0	3.25318	13.3377
mlclust_1831	chr18	33075479	33098887	-	23408	chr5	110534915	110560013	-	25098	1302	434	0.5	90	0.864773	0.060136
mlclust_1832	chr18	33954574	33955640	+	1066	chr5	111496597	111498007	+	1410	401	446	0.05313	0	0.368865	39.0314
mlclust_1833	chr18	35091822	35095106	+	3284	chr5	137879120	137880129	+	1009	3283	1009	0.52982	105	0.205875	0.253639
mlclust_1834	chr18	35113701	35115584	+	1883	chr5	137910786	137912879	+	2093	1880	2090	0.0529	105	7.78913	0.4556
mlclust_1835	chr18	35193814	35196302	+	2488	chr5	137986859	137988824	+	1965	2488	1965	0.11745	0	0.024789	0.013282
mlclust_1836	chr18	35713063	35717539	+	4476	chr5	138609790	138615881	+	6091	2519	4373	0.26901	117	0.127369	0.372921
mlclust_1837	chr18	36480559	36481146	-	587	chr5	139526422	139526976	-	554	586	553	0.02897	0	1.09346	0.333473
mlclust_1838	chr18	37815554	37818327	+	2773	chr5	140706074	140709084	+	3010	2773	3010	0.04098	0	0.385124	0.525759
mlclust_1839	chr18	38409275	38409854	-	579	chr5	141302890	141303326	-	436	579	436	0.14089	0	0.059805	0.247148
mlclust_1840	chr18	38478632	38482159	+	3527	chr5	141369839	141372512	+	2673	3527	2673	0.13774	0	0.080029	0.371483
mlclust_1841	chr18	39570465	39572181	-	1716	chr5	142657753	142659408	-	1655	1715	1654	0.01811	129	0.13167	27.2499
mlclust_1842	chr18	39650655	39651930	+	1275	chr5	142784276	142785621	+	1345	1275	1345	0.02672	144	0.251642	0.100635
mlclust_1843	chr18	40507083	40511405	+	4322	chr5	143666676	143670269	+	3593	4320	3583	0.09326	0	0.143806	0.023395
mlclust_1844	chr18	40528890	40543602	+	14712	chr5	143684600	143698488	+	13888	456	297	0.21116	0	0.12975	0.677358
mlclust_1845	chr18	40690809	40694829	+	4020	chr5	143853742	143857704	+	3962	4020	3962	0.00727	0	0.009556	1.68408
mlclust_1846	chr18	41965724	41968055	-	2331	chr5	145070633	145073543	-	2910	2313	2273	0.00872	0	0	0.21831
mlclust_1847	chr18	42434040	42434841	-	801	chr5	145582357	145582975	-	618	801	618	0.12896	0	0.044048	0
mlclust_1848	chr18	42775289	42777578	-	2289	chr5	145929322	145934538	-	5216	1024	583	0.27442	108	0.028935	0.833918
mlclust_1849	chr18	43480645	43482279	-	1634	chr5	146770376	146771956	-	1580	1634	1580	0.0168	0	0.072419	74.1053
mlclust_1850	chr18	44987399	44988577	-	1178	chr5	112849003	112849784	-	781	1178	781	0.20265	255	0.255614	0.197298
mlclust_1851	chr18	45495657	45497484	+	1827	chr5	113456890	113458432	+	1542	1827	1542	0.08459	0	0	0.066637
mlclust_1852	chr18	46395137	46397438	-	2301	chr5	114542912	114544769	-	1857	2300	1856	0.10683	90	0.083509	1.48044
mlclust_1853	chr18	46441818	46442836	-	1018	chr5	114602813	114603499	-	686	1018	686	0.19484	0	0.026015	7.49493
mlclust_1854	chr18	46499549	46500083	-	534	chr5	114651437	114652053	-	616	534	616	0.0713	0	0.16646	0
mlclust_1855	chr18	46661402	46663326	-	1924	chr5	114856607	114858588	-	1981	1922	1979	0.01461	0	0.036715	5.93835
mlclust_1856	chr18	47612321	47630522	+	18201	chr5	115986911	116006834	+	19923	676	540	0.11184	195	0.099983	0.577921
[truncated: 2,305 more rows]

## Sheet: orthologs
DATA	Orthologous pairs of human and mouse lincRNAs (196 pairs)
[truncated: 202 more rows]

## Sheet: Expression
			Distribution of RPKM values
[truncated: 5 more rows]

[truncated: 4 more sheets: bstrap_orf_90, bstrap_orf_120, bstrap_orf_150, bstrap_No_ORF]
